# Supplementary material for: Construction of a Global Pain Systems Network Highlights Phospholipid Signaling as a Regulator of Heat Nociception
Source: PubMed Central journal article supplement (PMC3516557; doi:10.1371/journal.pgen.1003071), 2012-12-06
Supplement: pgen.1003071.s002.pdf [file pgen.1003071.s002.pdf]

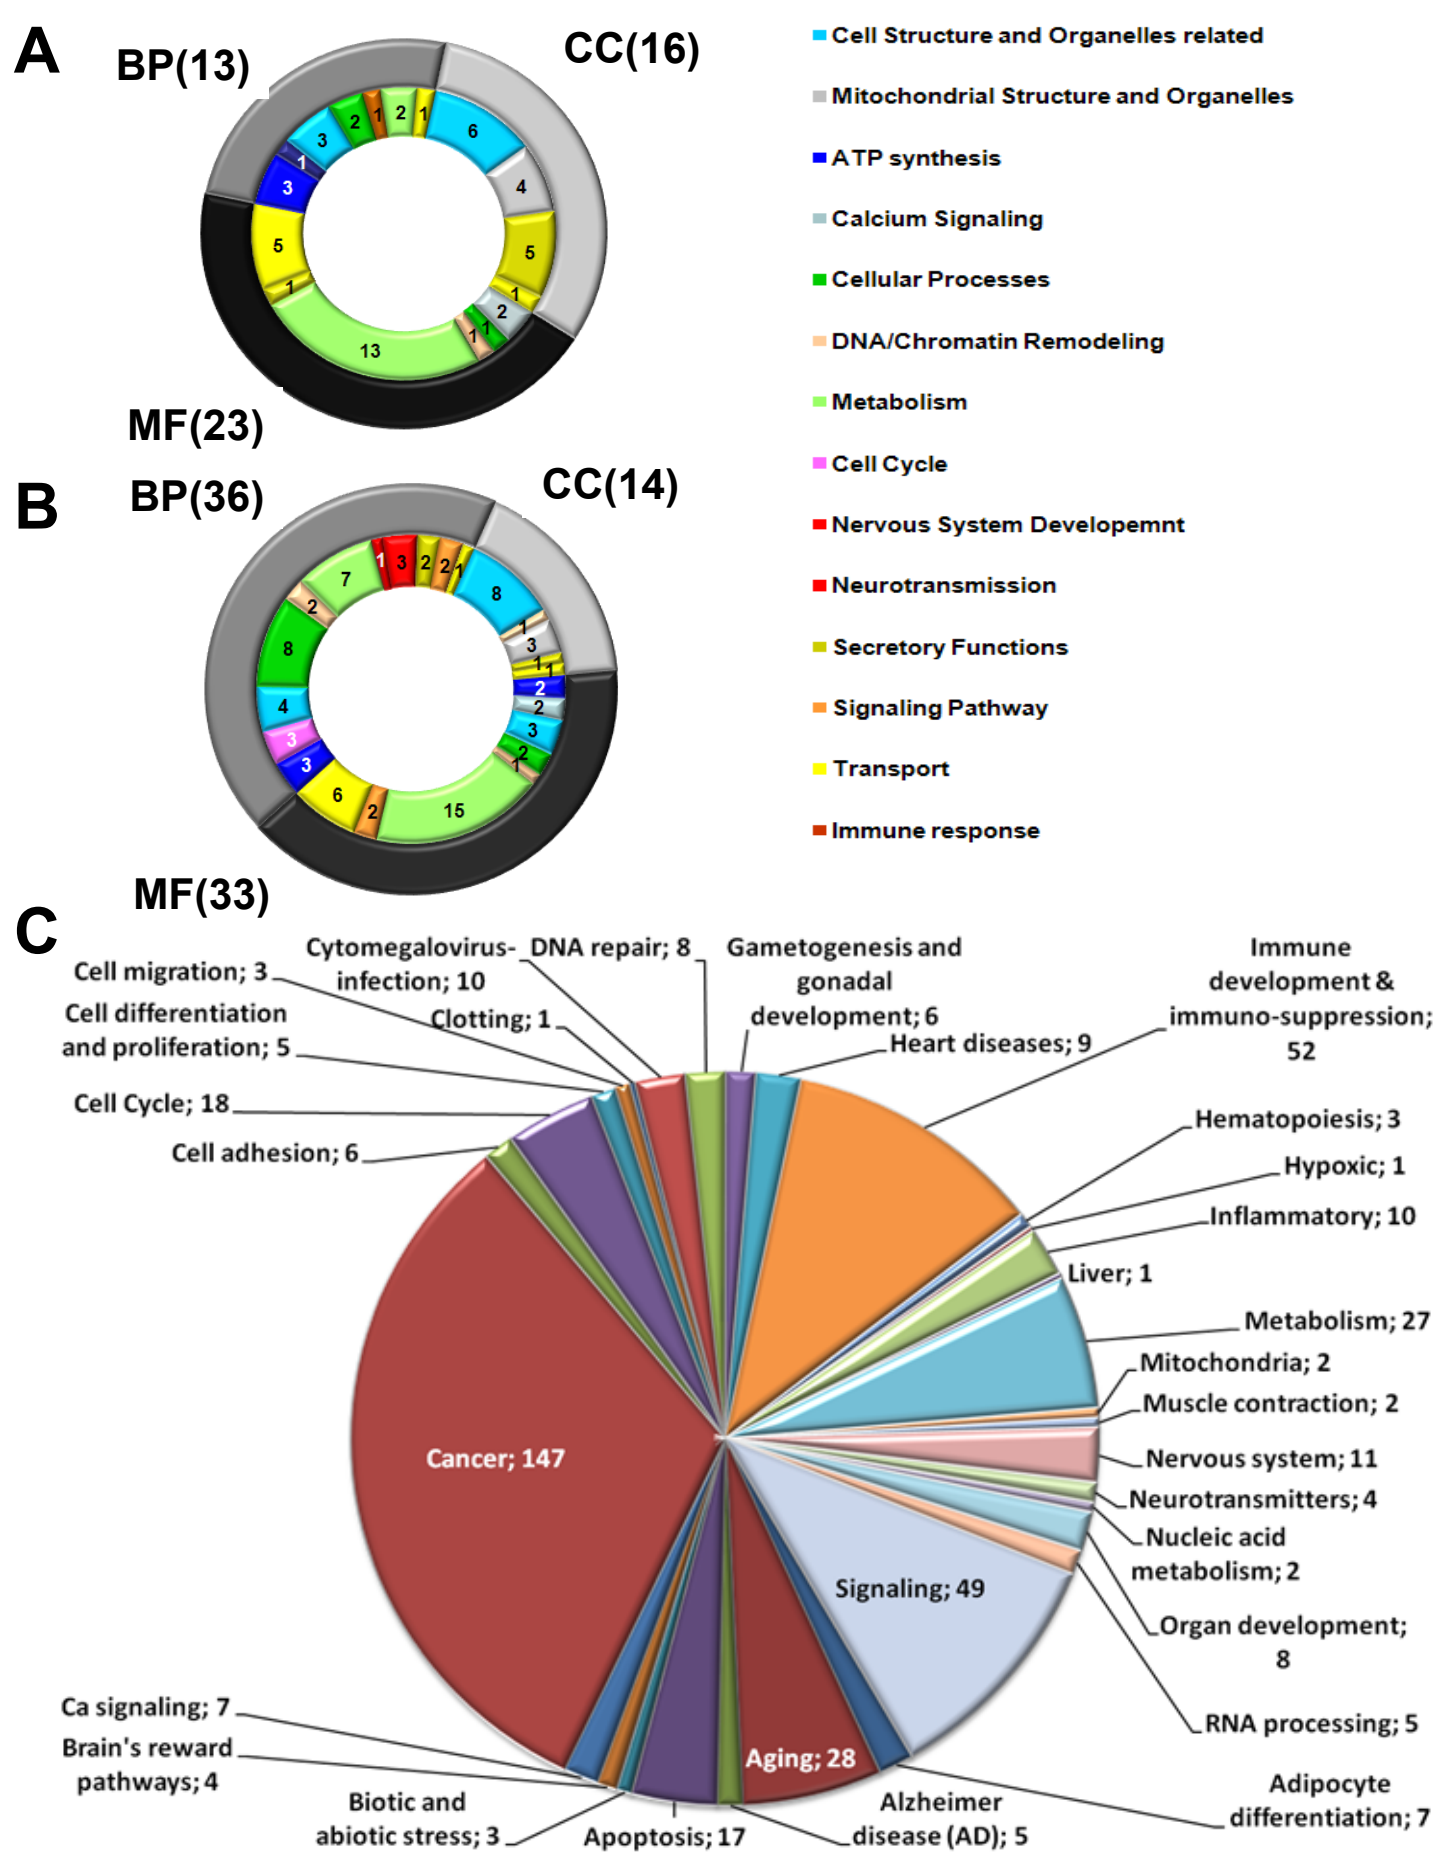

**Figure S2**
