# Supplementary material for: Construction of a Global Pain Systems Network Highlights Phospholipid Signaling as a Regulator of Heat Nociception
Source: PLoS Genet. 2012 Dec 6;8(12):e1003071. doi: 10.1371/journal.pgen.1003071 (PMC3516557; doi:10.1371/journal.pgen.1003071)
Supplement: Table S4 — Interactions between candidate pain genes and first degree binding partners. All interactions involving mammalian orthologs of Drosophila pain hit genes and their first degree binding partners are listed. Each row corresponds to a biological interaction between two proteins. Every interaction has two participating nodes: Source and Target. Gene symbols and CG IDs for all source and target nodes are listed. Classifications of all source and target nodes into pain hits (pain), binding partners (BP), and developmentally lethal phenotypes are provided. Potential mosue and human orthologs are presented for hits and binding partners. Both One-to-one and many to many mappings were observed between the Drosophila and the mammalian genes. (XLS) [file pgen.1003071.s009.xls]

## Sheet: TableS3.Candidatepaingenesandfi
Table S4. Candidate pain genes and first degree binding partners and mosue and human homologs
SOURCE									TARGET
CGID	Gene Symbol	Category	200804_fbgn	200804_fbgn_info	Predicted orthologs in Homo sapiens based on Inparanoid6.1 seed-ortholog/identical seed-inparalog assignments (I), or Compara49 1to1 ortholog assignment (COMP), or Homologene cluster with one representative per wanted species (HOM_clusterid), or Orthomcl cluster with one representative per wanted species (OMCL_clusterid)	Other predicted orthologs in Homo sapiens based on Inparanoid6.1 (I), or Compara49 (COMP), or Homologene cluster (HOM_clusterid), or Orthomcl cluster (OMCL_clusterid)	Predicted orthologs in Mus musculus based on Inparanoid6.1 seed-ortholog/identical seed-inparalog assignments (I), or Compara49 1to1 ortholog assignment (COMP), or Homologene cluster with one representative per wanted species (HOM_clusterid), or Orthomcl cluster with one representative per wanted species (OMCL_clusterid)	Other predicted orthologs in Mus musculus based on Inparanoid6.1 (I), or Compara49 (COMP), or Homologene cluster (HOM_clusterid), or Orthomcl cluster (OMCL_clusterid)	CGID	Gene Symbol	Category	200804_fbgn	200804_fbgn_info	Predicted orthologs in Homo sapiens based on Inparanoid6.1 seed-ortholog/identical seed-inparalog assignments (I), or Compara49 1to1 ortholog assignment (COMP), or Homologene cluster with one representative per wanted species (HOM_clusterid), or Orthomcl cluster with one representative per wanted species (OMCL_clusterid)	Other predicted orthologs in Homo sapiens based on Inparanoid6.1 (I), or Compara49 (COMP), or Homologene cluster (HOM_clusterid), or Orthomcl cluster (OMCL_clusterid)	Predicted orthologs in Mus musculus based on Inparanoid6.1 seed-ortholog/identical seed-inparalog assignments (I), or Compara49 1to1 ortholog assignment (COMP), or Homologene cluster with one representative per wanted species (HOM_clusterid), or Orthomcl cluster with one representative per wanted species (OMCL_clusterid)	Other predicted orthologs in Mus musculus based on Inparanoid6.1 (I), or Compara49 (COMP), or Homologene cluster (HOM_clusterid), or Orthomcl cluster (OMCL_clusterid)
CG10018	Snm1	BP	FBgn0037338	Snm1 Snm1 DNA repair	ENSG00000198924 DCLRE1A DNA cross-link repair 1A protein (HOMG_8920, COMP, I)	ENSG00000118655 DCLRE1B DNA cross-link repair 1B protein (OMCL_OG2_71630); ENSG00000198924 DCLRE1A DNA cross-link repair 1A protein (OMCL_OG2_71630)	ENSMUSG00000025077 Dclre1a DNA cross-link repair 1A protein (HOMG_8920, COMP, I)	ENSMUSG00000027845 Dclre1b DNA cross-link repair 1B protein (OMCL_OG2_71630); ENSMUSG00000025077 Dclre1a DNA cross-link repair 1A protein (OMCL_OG2_71630)	CG1966	Acf1	PAIN	FBgn0027620	Acf1 ATP-dependent chromatin assembly factor large subunit nucleosome positioning,chromatin assembly or disassembly,neuron development,dendrite morphogenesis,regulation of transcription, DNA-dependent,nucleosome mobilization,nucleosome assembly,muscle development,epidermis development	ENSG00000198604 BAZ1A Bromodomain adjacent to zinc finger domain protein 1A WCRF18 (HOMG_45654, I, OMCL_OG2_78483)	-	ENSMUSG00000035021 Baz1a Bromodomain adjacent to zinc finger domain protein 1A (HOMG_45654, I, OMCL_OG2_78483)	-
CG10018	Snm1	BP	FBgn0037338	Snm1 Snm1 DNA repair	ENSG00000198924 DCLRE1A DNA cross-link repair 1A protein (HOMG_8920, COMP, I)	ENSG00000118655 DCLRE1B DNA cross-link repair 1B protein (OMCL_OG2_71630); ENSG00000198924 DCLRE1A DNA cross-link repair 1A protein (OMCL_OG2_71630)	ENSMUSG00000025077 Dclre1a DNA cross-link repair 1A protein (HOMG_8920, COMP, I)	ENSMUSG00000027845 Dclre1b DNA cross-link repair 1B protein (OMCL_OG2_71630); ENSMUSG00000025077 Dclre1a DNA cross-link repair 1A protein (OMCL_OG2_71630)	CG13096	CG13096	PAIN	FBgn0032050	CG13096 CG13096 translation	ENSG00000171490 RSL1D1 Ribosomal L1 domain-containing protein 1 (OMCL_OG2_72799, I)	-	ENSMUSG00000005846 Rsl1d1 ribosomal L1 domain containing 1 (OMCL_OG2_72799, I)	-
CG10018	Snm1	BP	FBgn0037338	Snm1 Snm1 DNA repair	ENSG00000198924 DCLRE1A DNA cross-link repair 1A protein (HOMG_8920, COMP, I)	ENSG00000118655 DCLRE1B DNA cross-link repair 1B protein (OMCL_OG2_71630); ENSG00000198924 DCLRE1A DNA cross-link repair 1A protein (OMCL_OG2_71630)	ENSMUSG00000025077 Dclre1a DNA cross-link repair 1A protein (HOMG_8920, COMP, I)	ENSMUSG00000027845 Dclre1b DNA cross-link repair 1B protein (OMCL_OG2_71630); ENSMUSG00000025077 Dclre1a DNA cross-link repair 1A protein (OMCL_OG2_71630)	CG7100	CadN	PAIN	FBgn0015609	CadN Cadherin-N axon target recognition,axon extension involved in axon guidance,axon guidance,calcium-dependent cell-cell adhesion,negative regulation of dendrite morphogenesis,homophilic cell adhesion,axonal fasciculation,cell adhesion,ommatidial rotation,retinal ganglion cell axon guidance	-	ENSG00000189184 PCDH18 Protocadherin-18 precursor (OMCL_OG2_70632); ENSG00000146001 PCDHB18 protocadherin beta 18 pseudogene on chromosome 5 (OMCL_OG2_70632); ENSG00000081818 PCDHB4 Protocadherin beta 4 precursor (OMCL_OG2_70632); ENSG00000113212 PCDHB7 Protocadherin beta 7 precursor (OMCL_OG2_70632); ENSG00000204963 PCDHA7 Protocadherin alpha 7 precursor (OMCL_OG2_70632); ENSG00000196159 FAT4 FA…	-	ENSMUSG00000043458 Pcdhb12 protocadherin beta 12 (OMCL_OG2_70632); ENSMUSG00000045876 Pcdhb8 protocadherin beta 8 (OMCL_OG2_70632); ENSMUSG00000046743 Fat4 FAT tumor suppressor homolog 4 (OMCL_OG2_70632); ENSMUSG00000036510 Cdh8 Cadherin-8 precursor (I); ENSMUSG00000053166 Cdh22 Cadherin-22 precursor (I); ENSMUSG00000051323 Pcdh19 Protocadherin-19 precursor (OMCL_OG2_70632); ENSMUSG00000074505 Fa…
CG10032	CG10032	BP	FBgn0037493	CG10032 CG10032	-	-	-	-	CG34401	CG34401	PAIN	FBgn0085430	CG34401	ENSG00000214655 KIAA0913 \N (COMP); 23053 KIAA0913 (HOMG_34313); ENSG00000162415 ZSWIM5 Zinc finger SWIM domain-containing protein 5 (I)	ENSG00000130449 ZSWIM6 Zinc finger SWIM domain-containing protein 6 (I); ENSG00000132003 ZSWIM4 Zinc finger SWIM domain-containing protein 4 (I)	ENSMUSG00000021819 2310021P13Rik Zinc finger SWIM domain-containing protein KIAA0913 (HOMG_34313, COMP, I, OMCL_OG2_76846)	-
CG10032	CG10032	BP	FBgn0037493	CG10032 CG10032	-	-	-	-	CG4863	RpL3	PAIN	FBgn0020910	RpL3 Ribosomal protein L3 mitotic spindle organization and biogenesis,translation,mitotic spindle elongation	ENSG00000100316 RPL3 60S ribosomal protein L3 (I, HOMG_747)	ENSG00000140986 RPL3L 60S ribosomal protein L3-like (OMCL_OG2_71114, I, COMP); ENSG00000100316 RPL3 60S ribosomal protein L3 (OMCL_OG2_71114, COMP)	MGI:3644217 EG668219 predicted gene, EG668219 (I); ENSMUSG00000060036 Rpl3 60S ribosomal protein L3 (I)	ENSMUSG00000068262 \N \N (OMCL_OG2_71114, I, COMP); ENSMUSG00000060036 Rpl3 60S ribosomal protein L3 (OMCL_OG2_71114, COMP, HOMG_747); MGI:3647624 EG545864 predicted gene, EG545864 (I); 100043000 LOC100043000 (HOMG_747); ENSMUSG00000060264 \N \N (OMCL_OG2_71114); ENSMUSG00000002500 Rpl3l ribosomal protein L3-like (COMP); ENSMUSG00000057111 (OMCL_OG2_71114)
CG10032	CG10032	BP	FBgn0037493	CG10032 CG10032	-	-	-	-	CG12932	CG12932	PAIN	FBgn0033419	CG12932 CG12932	-	-	-	-
CG10032	CG10032	BP	FBgn0037493	CG10032 CG10032	-	-	-	-	CG10691	l(2)37Cc	PAIN	FBgn0002031	l(2)37Cc lethal (2) 37Cc instar larval or pupal development	ENSG00000167085 PHB Prohibitin (HOMG_1980, COMP, I, OMCL_OG2_72138)	-	ENSMUSG00000038845 1700071K01Rik Prohibitin (HOMG_1980, I, OMCL_OG2_72138); MGI:3648907 EG665511 predicted gene, EG665511 (I); MGI:97572 Phb prohibitin (I)	ENSMUSG00000038845 1700071K01Rik Prohibitin (I, COMP); ENSMUSG00000067547 Phb Adult male stomach cDNA, RIKEN full-length enriched library, clone:2210416H05 product:prohibitin, full insert sequence (COMP)
CG10032	CG10032	BP	FBgn0037493	CG10032 CG10032	-	-	-	-	CG4798	l(2)k01209	PAIN	FBgn0022029	l(2)k01209 lethal (2) k01209 metabolic process	ENSG00000198276 UCKL1 Uridine/cytidine kinase-like 1 (COMP, I)	ENSG00000143179 UCK2 Uridine-cytidine kinase 2 (OMCL_OG2_70884); ENSG00000198276 UCKL1 Uridine/cytidine kinase-like 1 (OMCL_OG2_70884)	ENSMUSG00000010492 Uckl1 Uridine/cytidine kinase-like 1 (COMP, I)	ENSMUSG00000026558 Uck2 Uridine-cytidine kinase 2 (OMCL_OG2_70884); ENSMUSG00000010492 Uckl1 Uridine/cytidine kinase-like 1 (OMCL_OG2_70884)
CG10033	Dmel_CG10033	PAIN	FBgn0000721	for foraging larval locomotory behavior,protein amino acid phosphorylation,regulation of heart contraction,larval feeding behavior,feeding behavior	ENSG00000185532 PRKG1 cGMP-dependent protein kinase 1, beta isozyme (COMP, I)	ENSG00000185532 PRKG1 cGMP-dependent protein kinase 1, beta isozyme (OMCL_OG2_71230); ENSG00000138669 PRKG2 cGMP-dependent protein kinase 2 (OMCL_OG2_71230)	ENSMUSG00000052920 Prkg1 cGMP-dependent protein kinase 1, alpha isozyme (COMP, I)	ENSMUSG00000052920 Prkg1 cGMP-dependent protein kinase 1, alpha isozyme (OMCL_OG2_71230); ENSMUSG00000029334 Prkg2 cGMP-dependent protein kinase 2 (OMCL_OG2_71230)	CG12065	CG12065	BP	FBgn0030052	CG12065 CG12065	-	-	-	-
CG10103	CG10103	BP	FBgn0035715	CG10103 CG10103	ENSG00000182149 KIAA0174 Uncharacterized protein KIAA0174 (OMCL_OG2_72950, COMP, I, HOMG_8849)	-	ENSMUSG00000031729 2400003C14Rik Uncharacterized protein KIAA0174 (OMCL_OG2_72950, COMP, I, HOMG_8849)	-	CG12082	CG12082	PAIN	FBgn0035402	CG12082 CG12082 protein deubiquitination,ubiquitin-dependent protein catabolic process	ENSG00000111667 USP5 Ubiquitin carboxyl-terminal hydrolase 5 (HOMG_55758, I)	ENSG00000058056 USP13 Ubiquitin carboxyl-terminal hydrolase 13 (OMCL_OG2_71693, I, COMP); ENSG00000111667 USP5 Ubiquitin carboxyl-terminal hydrolase 5 (OMCL_OG2_71693, COMP)	ENSMUSG00000038429 Usp5 Ubiquitin carboxyl-terminal hydrolase 5 (HOMG_55758, I)	ENSMUSG00000056900 Usp13 ubiquitin specific protease 13 (OMCL_OG2_71693, I, COMP); ENSMUSG00000038429 Usp5 Ubiquitin carboxyl-terminal hydrolase 5 (OMCL_OG2_71693, COMP)
CG10209	CG10209	BP	FBgn0033971	CG10209 CG10209	-	-	-	-	CG2371	CG2371	PAIN	FBgn0030323	CG2371 CG2371	ENSG00000145781 COMMD10 COMM domain-containing protein 10 (OMCL_OG2_80120, COMP, I)	-	ENSMUSG00000042705 Commd10 COMM domain-containing protein 10 (OMCL_OG2_80120, COMP, I)	-
CG10263	CG10263	BP	FBgn0032812	CG10263 CG10263	ENSG00000105879 CBLL1 E3 ubiquitin-protein ligase Hakai (OMCL_OG2_80074)	ENSG00000105879 CBLL1 E3 ubiquitin-protein ligase Hakai (COMP); ENSG00000175809 ZNF645 Zinc finger protein 645 (COMP)	ENSMUSG00000020659 Cbll1 E3 ubiquitin-protein ligase Hakai (OMCL_OG2_80074, COMP)	-	CG15167	CG15167	PAIN	FBgn0032709	CG15167 CG15167	-	-	-	-
CG10263	CG10263	BP	FBgn0032812	CG10263 CG10263	ENSG00000105879 CBLL1 E3 ubiquitin-protein ligase Hakai (OMCL_OG2_80074)	ENSG00000105879 CBLL1 E3 ubiquitin-protein ligase Hakai (COMP); ENSG00000175809 ZNF645 Zinc finger protein 645 (COMP)	ENSMUSG00000020659 Cbll1 E3 ubiquitin-protein ligase Hakai (OMCL_OG2_80074, COMP)	-	CG5380	CG5380	PAIN	FBgn0038951	CG5380 CG5380 transcription,transcription from RNA polymerase III promoter	ENSG00000132664 POLR3F DNA-directed RNA polymerase III subunit RPC6 (HOMG_4722, COMP, I, OMCL_OG2_72557)	-	ENSMUSG00000027427 Polr3f DNA-directed RNA polymerase III subunit RPC6 (HOMG_4722, COMP, I, OMCL_OG2_72557)	-
CG10305	RpS26	BP	FBgn0004413	RpS26 Ribosomal protein S26 translation	ENSG00000196656 RPS26 40S ribosomal protein S26 (I); ENSG00000197728 RS26_HUMAN 40S ribosomal protein S26 (I)	ENSG00000170847 RPS26P10 40S ribosomal protein S26-like on chromosome 13 (I, COMP); ENSG00000204652 \N \N (I, OMCL_OG2_71387); ENSG00000173534 Q75MH1_HUMAN Ribosomal protein S26 (I, COMP); ENSG00000196656 RPS26 40S ribosomal protein S26 (COMP, OMCL_OG2_71387); ENSG00000197728 RS26_HUMAN 40S ribosomal protein S26 (COMP, OMCL_OG2_71387); ENSG00000196933 RPS26L1 40S ribosomal protein S26-like 1 (I, …	ENSMUSG00000025362 Rps26 40S ribosomal protein S26 (I, HOMG_37420); ENSMUSG00000059775 Rps26 40S ribosomal protein S26 (I); MGI:1351628 Rps26 ribosomal protein S26 (I)	ENSMUSG00000059775 Rps26 40S ribosomal protein S26 (COMP, OMCL_OG2_71387); ENSMUSG00000025362 Rps26 40S ribosomal protein S26 (COMP, OMCL_OG2_71387); MGI:3648118 EG626175 predicted gene, EG626175 (I)	CG8487	garz	PAIN	FBgn0033714	garz gartenzwerg phagocytosis, engulfment,ER to Golgi vesicle-mediated transport,intra-Golgi vesicle-mediated transport,regulation of ARF protein signal transduction	ENSG00000107862 GBF1 Golgi-specific brefeldin A-resistance guanine nucleotide exchange factor 1 (HOMG_37897, COMP, I, OMCL_OG2_73056)	-	ENSMUSG00000025224 Gbf1 golgi-specific brefeldin A-resistance factor 1 (HOMG_37897, COMP, I, OMCL_OG2_73056)	-
CG10305	RpS26	BP	FBgn0004413	RpS26 Ribosomal protein S26 translation	ENSG00000196656 RPS26 40S ribosomal protein S26 (I); ENSG00000197728 RS26_HUMAN 40S ribosomal protein S26 (I)	ENSG00000170847 RPS26P10 40S ribosomal protein S26-like on chromosome 13 (I, COMP); ENSG00000204652 \N \N (I, OMCL_OG2_71387); ENSG00000173534 Q75MH1_HUMAN Ribosomal protein S26 (I, COMP); ENSG00000196656 RPS26 40S ribosomal protein S26 (COMP, OMCL_OG2_71387); ENSG00000197728 RS26_HUMAN 40S ribosomal protein S26 (COMP, OMCL_OG2_71387); ENSG00000196933 RPS26L1 40S ribosomal protein S26-like 1 (I, …	ENSMUSG00000025362 Rps26 40S ribosomal protein S26 (I, HOMG_37420); ENSMUSG00000059775 Rps26 40S ribosomal protein S26 (I); MGI:1351628 Rps26 ribosomal protein S26 (I)	ENSMUSG00000059775 Rps26 40S ribosomal protein S26 (COMP, OMCL_OG2_71387); ENSMUSG00000025362 Rps26 40S ribosomal protein S26 (COMP, OMCL_OG2_71387); MGI:3648118 EG626175 predicted gene, EG626175 (I)	CG10728	vls	PAIN	FBgn0003978	vls valois mitosis,cellularization,pole plasm assembly	ENSG00000116455 WDR77 Methylosome protein 50 (COMP, I, OMCL_OG2_81397)	-	ENSMUSG00000000561 Wdr77 Methylosome protein 50 (COMP, OMCL_OG2_81397)	-
CG10308	CycJ	BP	FBgn0010317	CycJ Cyclin J mitosis,mitotic cell cycle, embryonic	ENSG00000107443 CCNJ cyclin J (OMCL_OG2_83117, I)	ENSG00000135083 CCNJL cyclin J-like (I, COMP); ENSG00000107443 CCNJ cyclin J (COMP)	ENSMUSG00000025010 Ccnj Cyclin-J (OMCL_OG2_83117, I)	ENSMUSG00000044707 Ccnjl Cyclin-J-like protein (I, COMP); ENSMUSG00000025010 Ccnj Cyclin-J (COMP)	CG5473	SP2637	PAIN	FBgn0034371	SP2637 SP2637	ENSG00000157045 NTAN1 Protein N-terminal asparagine amidohydrolase (OMCL_OG2_78753, HOMG_7869, COMP, I)	-	ENSMUSG00000022681 Ntan1 Protein N-terminal asparagine amidohydrolase (OMCL_OG2_78753, HOMG_7869, COMP, I)	-
CG10327	TBPH	BP	FBgn0025790	TBPH TBPH	ENSG00000120948 TARDBP TAR DNA-binding protein 43 (OMCL_OG2_75828, I, HOMG_7221)	ENSG00000120948 TARDBP TAR DNA-binding protein 43 (COMP)	ENSMUSG00000041459 Tardbp TAR DNA-binding protein 43 (OMCL_OG2_75828, I, HOMG_7221)	ENSMUSG00000041459 Tardbp TAR DNA-binding protein 43 (COMP)	CG12645	CG12645	PAIN	FBgn0030181	CG12645 CG12645	-	-	-	-
CG10498	cdc2c	BP	FBgn0004107	cdc2c cdc2c G2/M transition of mitotic cell cycle,regulation of cell cycle,protein amino acid phosphorylation,G1/S transition of mitotic cell cycle,cellular process,JAK-STAT cascade	ENSG00000123374 CDK2 Cell division protein kinase 2 (I, HOMG_74409)	ENSG00000108504 CDK3 Cell division protein kinase 3 (OMCL_OG2_70889, I, COMP); ENSG00000123374 CDK2 Cell division protein kinase 2 (OMCL_OG2_70889, COMP); ENSG00000170312 CDC2 Cell division control protein 2 homolog (OMCL_OG2_70889); ENSG00000164885 CDK5 Cell division protein kinase 5 (OMCL_OG2_70889)	ENSMUSG00000025358 Cdk2 Cell division protein kinase 2 (I, HOMG_74409); ENSMUSG00000034288 Cdk3 Cell division protein kinase 3 (I)	ENSMUSG00000025358 Cdk2 Cell division protein kinase 2 (OMCL_OG2_70889, I, COMP); ENSMUSG00000034288 Cdk3 Cell division protein kinase 3 (OMCL_OG2_70889, COMP); ENSMUSG00000019942 Cdc2a Cell division control protein 2 homolog (OMCL_OG2_70889); ENSMUSG00000028969 Cdk5 Cell division protein kinase 5 (OMCL_OG2_70889)	CG4609	fax	PAIN	FBgn0014163	fax failed axon connections axonogenesis	ENSG00000146267 C6orf168 Uncharacterized protein C6orf168 (OMCL_OG2_74720, COMP, I)	-	ENSMUSG00000028246 6230409E13Rik Mammary gland RCB-0526 Jyg-MC cDNA, RIKEN full-length enriched library, clone:G830005H23 product:hypothetical Glutathione S- transferase, C-terminal-like containing protein, full insert sequence (OMCL_OG2_74720, COMP, I)	-
CG10523	park	BP	FBgn0041100	park parkin negative regulation of JNK cascade,response to oxidative stress,methylation,mitochondrion organization and biogenesis,ubiquitin cycle	ENSG00000185345 PARK2 Parkin (OMCL_OG2_78738, COMP, I, HOMG_3355)	-	ENSMUSG00000023826 Park2 E3 ubiquitin-protein ligase parkin (OMCL_OG2_78738, COMP, I, HOMG_3355); MGI:1355296 Park2 Parkinson disease autosomal recessive, juvenile 2, parkin (I)	-	CG5134	MED9	PAIN	FBgn0034311	MED9 Mediator complex subunit 9	ENSG00000141026 MED9 mediator complex subunit 9 (COMP)	-	ENSMUSG00000061650 Med9 Mediator of RNA polymerase II transcription subunit 9 (COMP)	-
CG10523	park	BP	FBgn0041100	park parkin negative regulation of JNK cascade,response to oxidative stress,methylation,mitochondrion organization and biogenesis,ubiquitin cycle	ENSG00000185345 PARK2 Parkin (OMCL_OG2_78738, COMP, I, HOMG_3355)	-	ENSMUSG00000023826 Park2 E3 ubiquitin-protein ligase parkin (OMCL_OG2_78738, COMP, I, HOMG_3355); MGI:1355296 Park2 Parkinson disease autosomal recessive, juvenile 2, parkin (I)	-	CG1725	dlg1	PAIN	FBgn0001624	dlg1 discs large 1 morphogenesis of follicular epithelium,negative regulation of cell proliferation,establishment and/or maintenance of neuroblast polarity,septate junction assembly,basal protein localization,morphogenesis of a polarized epithelium,neuron differentiation,establishment and/or maintenance of polarity of embryonic epithelium,morphogenesis of an epithelium,establishment and/or mainte…	ENSG00000075711 DLG1 Disks large homolog 1 (I, HOMG_20869)	ENSG00000082458 DLG3 Discs large homolog 3 (I, OMCL_OG2_73729); ENSG00000132535 DLG4 Discs large homolog 4 (I, OMCL_OG2_73729); ENSG00000150672 DLG2 Discs large homolog 2 (I, OMCL_OG2_73729); ENSG00000075711 DLG1 Disks large homolog 1 (OMCL_OG2_73729)	ENSMUSG00000022770 Dlg1 Disks large homolog 1 (I, HOMG_20869)	ENSMUSG00000052572 Dlg2 Disks large homolog 2 (I, OMCL_OG2_73729); ENSMUSG00000020886 Dlg4 Disks large homolog 4 (I, OMCL_OG2_73729); ENSMUSG00000000881 Dlg3 Disks large homolog 3 (I, OMCL_OG2_73729); ENSMUSG00000022770 Dlg1 Disks large homolog 1 (OMCL_OG2_73729)
CG10540	cpa	PAIN	FBgn0034577	cpa capping protein alpha barbed-end actin filament capping,phagocytosis, engulfment,microtubule-based movement,actin filament organization,wing disc development,actin cytoskeleton organization and biogenesis,negative regulation of actin filament polymerization	ENSG00000116489 CAPZA1 F-actin capping protein subunit alpha-1 (I, HOMG_24376)	ENSG00000198898 CAPZA2 F-actin capping protein subunit alpha-2 (I, COMP, OMCL_OG2_72873); ENSG00000116489 CAPZA1 F-actin capping protein subunit alpha-1 (COMP, OMCL_OG2_72873); ENSG00000177938 CAPZA3 F-actin capping protein subunit alpha-3 (COMP)	ENSMUSG00000070372 Capza1 F-actin-capping protein subunit alpha-1 (I)	ENSMUSG00000015733 Capza2 F-actin-capping protein subunit alpha-2 (I, COMP, OMCL_OG2_72873); ENSMUSG00000074348 (OMCL_OG2_72873, HOMG_24376); ENSMUSG00000055357 4933400A11Rik RIKEN cDNA 4933400A11 gene on chromosome X (I, COMP); ENSMUSG00000070372 Capza1 F-actin-capping protein subunit alpha-1 (COMP); 100041985 LOC100041985 (HOMG_24376); ENSMUSG00000041791 Capza3 F-actin-capping protein subunit a…	CG15710	CG15710	BP	FBgn0034120	CG15710 CG15710	-	-	-	-
CG10550	CG10550	PAIN	FBgn0039321	CG10550 CG10550	-	-	-	-	CG9986	CG9986	BP	FBgn0039589	CG9986 CG9986	ENSG00000047621 C12orf4 Uncharacterized protein C12orf4 (HOMG_10685, OMCL_OG2_77548, COMP, I)	-	ENSMUSG00000030347 D6Wsu163e Uncharacterized protein C12orf4 homolog (HOMG_10685, OMCL_OG2_77548, COMP, I)	-
CG10550	CG10550	PAIN	FBgn0039321	CG10550 CG10550	-	-	-	-	CG1746	CG1746	BP	FBgn0039830	CG1746 CG1746 proton transport,ATP synthesis coupled proton transport	ENSG00000135390 ATP5G2 ATP synthase lipid-binding protein, mitochondrial precursor (I); ENSG00000154518 ATP5G3 ATP synthase lipid-binding protein, mitochondrial precursor (HOMG_1276)	ENSG00000154518 ATP5G3 ATP synthase lipid-binding protein, mitochondrial precursor (I, COMP, OMCL_OG2_71375); ENSG00000159199 ATP5G1 ATP synthase lipid-binding protein, mitochondrial precursor (COMP, OMCL_OG2_71375); ENSG00000135390 ATP5G2 ATP synthase lipid-binding protein, mitochondrial precursor (COMP, OMCL_OG2_71375)	ENSMUSG00000018770 Atp5g3 ATP synthase lipid-binding protein, mitochondrial precursor (HOMG_1276); ENSMUSG00000062683 Atp5g2 ATP synthase lipid-binding protein, mitochondrial precursor (I)	ENSMUSG00000018770 Atp5g3 ATP synthase lipid-binding protein, mitochondrial precursor (I, COMP, OMCL_OG2_71375); ENSMUSG00000006057 Atp5g1 ATP synthase lipid-binding protein, mitochondrial precursor (I, COMP, OMCL_OG2_71375); ENSMUSG00000062683 Atp5g2 ATP synthase lipid-binding protein, mitochondrial precursor (COMP, OMCL_OG2_71375); ENSMUSG00000068120 \N \N (OMCL_OG2_71375); ENSMUSG00000066724 \…
CG1064	Snr1	BP	FBgn0011715	Snr1 Snf5-related 1 dendrite morphogenesis,regulation of transcription,instar larval or pupal development,positive regulation of transcription, DNA-dependent,embryonic development via the syncytial blastoderm,imaginal disc-derived wing vein specification,chromatin remodeling,epidermis development,muscle development	ENSG00000099956 SMARCB1 SWI/SNF-related matrix-associated actin-dependent regulator of chromatin subfamily B member 1 (HOMG_2310, OMCL_OG2_73917, COMP, I)	-	ENSMUSG00000000902 Smarcb1 SWI/SNF-related matrix-associated actin-dependent regulator of chromatin subfamily B member 1 (HOMG_2310, OMCL_OG2_73917, COMP, I)	-	CG10540	cpa	PAIN	FBgn0034577	cpa capping protein alpha barbed-end actin filament capping,phagocytosis, engulfment,microtubule-based movement,actin filament organization,wing disc development,actin cytoskeleton organization and biogenesis,negative regulation of actin filament polymerization	ENSG00000116489 CAPZA1 F-actin capping protein subunit alpha-1 (I, HOMG_24376)	ENSG00000198898 CAPZA2 F-actin capping protein subunit alpha-2 (I, COMP, OMCL_OG2_72873); ENSG00000116489 CAPZA1 F-actin capping protein subunit alpha-1 (COMP, OMCL_OG2_72873); ENSG00000177938 CAPZA3 F-actin capping protein subunit alpha-3 (COMP)	ENSMUSG00000070372 Capza1 F-actin-capping protein subunit alpha-1 (I)	ENSMUSG00000015733 Capza2 F-actin-capping protein subunit alpha-2 (I, COMP, OMCL_OG2_72873); ENSMUSG00000074348 (OMCL_OG2_72873, HOMG_24376); ENSMUSG00000055357 4933400A11Rik RIKEN cDNA 4933400A11 gene on chromosome X (I, COMP); ENSMUSG00000070372 Capza1 F-actin-capping protein subunit alpha-1 (COMP); 100041985 LOC100041985 (HOMG_24376); ENSMUSG00000041791 Capza3 F-actin-capping protein subunit a…
CG1064	Snr1	BP	FBgn0011715	Snr1 Snf5-related 1 dendrite morphogenesis,regulation of transcription,instar larval or pupal development,positive regulation of transcription, DNA-dependent,embryonic development via the syncytial blastoderm,imaginal disc-derived wing vein specification,chromatin remodeling,epidermis development,muscle development	ENSG00000099956 SMARCB1 SWI/SNF-related matrix-associated actin-dependent regulator of chromatin subfamily B member 1 (HOMG_2310, OMCL_OG2_73917, COMP, I)	-	ENSMUSG00000000902 Smarcb1 SWI/SNF-related matrix-associated actin-dependent regulator of chromatin subfamily B member 1 (HOMG_2310, OMCL_OG2_73917, COMP, I)	-	CG4609	fax	PAIN	FBgn0014163	fax failed axon connections axonogenesis	ENSG00000146267 C6orf168 Uncharacterized protein C6orf168 (OMCL_OG2_74720, COMP, I)	-	ENSMUSG00000028246 6230409E13Rik Mammary gland RCB-0526 Jyg-MC cDNA, RIKEN full-length enriched library, clone:G830005H23 product:hypothetical Glutathione S- transferase, C-terminal-like containing protein, full insert sequence (OMCL_OG2_74720, COMP, I)	-
CG10685	l(2)37Cg	BP	FBgn0086447	l(2)37Cg lethal (2) 37Cg transcription from RNA polymerase I promoter	ENSG00000186184 POLR1D DNA-directed RNA polymerases I and III subunit RPAC2 (OMCL_OG2_72336, I)	-	ENSMUSG00000029642 Rpo1-3 DNA-directed RNA polymerases I and III subunit RPAC2 (OMCL_OG2_72336, COMP, I)	-	CG3213	CG3213	PAIN	FBgn0031545	CG3213 CG3213 translation	-	-	-	-
CG10685	l(2)37Cg	BP	FBgn0086447	l(2)37Cg lethal (2) 37Cg transcription from RNA polymerase I promoter	ENSG00000186184 POLR1D DNA-directed RNA polymerases I and III subunit RPAC2 (OMCL_OG2_72336, I)	-	ENSMUSG00000029642 Rpo1-3 DNA-directed RNA polymerases I and III subunit RPAC2 (OMCL_OG2_72336, COMP, I)	-	CG4279	CG4279	PAIN	FBgn0034600	CG4279 CG4279 nuclear mRNA splicing, via spliceosome,RNA processing	ENSG00000175324 LSM1 U6 snRNA-associated Sm-like protein LSm1 (OMCL_OG2_73340, HOMG_40945, COMP, I)	-	ENSMUSG00000037296 Lsm1 U6 snRNA-associated Sm-like protein LSm1 (OMCL_OG2_73340, HOMG_40945, COMP, I)	-
CG10689	l(2)37Cb	PAIN	FBgn0086444	l(2)37Cb lethal (2) 37Cb nuclear mRNA splicing, via spliceosome	ENSG00000204560 DHX16 Putative pre-mRNA-splicing factor ATP-dependent RNA helicase DHX16 (HOMG_2658, COMP, I); ENSG00000206397 DHX16 Putative pre-mRNA-splicing factor ATP-dependent RNA helicase DHX16 (I)	ENSG00000206486 Q5JP46_HUMAN DEAD/H box polypeptide 16 (OMCL_OG2_70665, I); ENSG00000206397 DHX16 Putative pre-mRNA-splicing factor ATP-dependent RNA helicase DHX16 (OMCL_OG2_70665); ENSG00000067596 DHX8 ATP-dependent RNA helicase DHX8 (OMCL_OG2_70665); ENSG00000140829 DHX38 Pre-mRNA-splicing factor ATP-dependent RNA helicase PRP16 (OMCL_OG2_70665); ENSG00000204560 DHX16 Putative pre-mRNA-splicin…	ENSMUSG00000024422 Dhx16 DEAH box polypeptide 16 (HOMG_2658, COMP, I)	ENSMUSG00000024422 Dhx16 DEAH box polypeptide 16 (OMCL_OG2_70665); ENSMUSG00000034931 Dhx8 DEAH box polypeptide 8 (OMCL_OG2_70665); ENSMUSG00000029169 Dhx15 Putative pre-mRNA-splicing factor ATP-dependent RNA helicase DHX15 (OMCL_OG2_70665); ENSMUSG00000037993 Dhx38 DEAH box polypeptide 38 (OMCL_OG2_70665)	CG10324	CG10324	BP	FBgn0038454	CG10324 CG10324	ENSG00000068394 GPKOW G patch domain and KOW motifs-containing protein (OMCL_OG2_74137, COMP, I)	-	ENSMUSG00000031148 Gpkow G patch domain and KOW motifs-containing protein (OMCL_OG2_74137, COMP, I)	-
CG10691	l(2)37Cc	PAIN	FBgn0002031	l(2)37Cc lethal (2) 37Cc instar larval or pupal development	ENSG00000167085 PHB Prohibitin (HOMG_1980, COMP, I, OMCL_OG2_72138)	-	ENSMUSG00000038845 1700071K01Rik Prohibitin (HOMG_1980, I, OMCL_OG2_72138); MGI:3648907 EG665511 predicted gene, EG665511 (I); MGI:97572 Phb prohibitin (I)	ENSMUSG00000038845 1700071K01Rik Prohibitin (I, COMP); ENSMUSG00000067547 Phb Adult male stomach cDNA, RIKEN full-length enriched library, clone:2210416H05 product:prohibitin, full insert sequence (COMP)	CG4015	Fcp3C	BP	FBgn0000644	Fcp3C Follicle cell protein 3C	-	-	-	-
CG10695	Pat1	BP	FBgn0029878	Pat1 Protein interacting with APP tail-1 phagocytosis, engulfment,microtubule-based movement	ENSG00000062725 APPBP2 Amyloid protein-binding protein 2 (COMP, I, OMCL_OG2_79936, HOMG_31378)	-	ENSMUSG00000018481 Appbp2 Amyloid protein-binding protein 2 (COMP, I, OMCL_OG2_79936, HOMG_31378)	-	CG8849	mRpL24	PAIN	FBgn0031651	mRpL24 mitochondrial ribosomal protein L24 translation	ENSG00000143314 MRPL24 39S ribosomal protein L24, mitochondrial precursor (HOMG_12241, COMP, I, OMCL_OG2_71212)	-	ENSMUSG00000019710 Mrpl24 39S ribosomal protein L24, mitochondrial precursor (HOMG_12241, COMP, I, OMCL_OG2_71212)	-
CG10695	Pat1	BP	FBgn0029878	Pat1 Protein interacting with APP tail-1 phagocytosis, engulfment,microtubule-based movement	ENSG00000062725 APPBP2 Amyloid protein-binding protein 2 (COMP, I, OMCL_OG2_79936, HOMG_31378)	-	ENSMUSG00000018481 Appbp2 Amyloid protein-binding protein 2 (COMP, I, OMCL_OG2_79936, HOMG_31378)	-	CG4887	CG4887	PAIN	FBgn0031318	CG4887 CG4887	ENSG00000182872 RBM10 RNA-binding protein 10 (I, HOMG_31330); ENSG00000003756 RBM5 RNA-binding protein 5 (I)	ENSG00000003756 RBM5 RNA-binding protein 5 (COMP, OMCL_OG2_73880); ENSG00000182872 RBM10 RNA-binding protein 10 (COMP, OMCL_OG2_73880); ENSG00000004534 RBM6 RNA-binding protein 6 (COMP)	ENSMUSG00000031060 Rbm10 RNA binding motif protein 10 (I, HOMG_31330); ENSMUSG00000032580 Rbm5 RNA-binding protein 5 (I)	ENSMUSG00000032580 Rbm5 RNA-binding protein 5 (COMP, OMCL_OG2_73880); ENSMUSG00000031060 Rbm10 RNA binding motif protein 10 (COMP, OMCL_OG2_73880); ENSMUSG00000042188 \N \N (OMCL_OG2_73880); ENSMUSG00000032582 Rbm6 RNA binding motif protein 6 isoform b (COMP)
CG10695	Pat1	BP	FBgn0029878	Pat1 Protein interacting with APP tail-1 phagocytosis, engulfment,microtubule-based movement	ENSG00000062725 APPBP2 Amyloid protein-binding protein 2 (COMP, I, OMCL_OG2_79936, HOMG_31378)	-	ENSMUSG00000018481 Appbp2 Amyloid protein-binding protein 2 (COMP, I, OMCL_OG2_79936, HOMG_31378)	-	CG14506	CG14506	PAIN	FBgn0039659	CG14506 CG14506	-	-	-	-
CG10699	Lim3	BP	FBgn0002023	Lim3 Lim3 regulation of transcription, DNA-dependent,motor axon guidance,nervous system development	ENSG00000107187 LHX3 LIM/homeobox protein Lhx3 (HOMG_7814, I)	ENSG00000121454 LHX4 LIM/homeobox protein Lhx4 (I, OMCL_OG2_75554); ENSG00000107187 LHX3 LIM/homeobox protein Lhx3 (OMCL_OG2_75554)	ENSMUSG00000026934 Lhx3 LIM/homeobox protein Lhx3 (HOMG_7814, I)	ENSMUSG00000026468 Lhx4 LIM/homeobox protein Lhx4 (I, OMCL_OG2_75554); ENSMUSG00000026934 Lhx3 LIM/homeobox protein Lhx3 (OMCL_OG2_75554)	CG1119	Gnf1	PAIN	FBgn0004913	Gnf1 Germ line transcription factor 1 DNA replication	ENSG00000035928 RFC1 Replication factor C subunit 1 (OMCL_OG2_71775, COMP, I, HOMG_2187)	-	ENSMUSG00000029191 Rfc1 Replication factor C subunit 1 (OMCL_OG2_71775, COMP, I, HOMG_2187)	-
CG10699	Lim3	BP	FBgn0002023	Lim3 Lim3 regulation of transcription, DNA-dependent,motor axon guidance,nervous system development	ENSG00000107187 LHX3 LIM/homeobox protein Lhx3 (HOMG_7814, I)	ENSG00000121454 LHX4 LIM/homeobox protein Lhx4 (I, OMCL_OG2_75554); ENSG00000107187 LHX3 LIM/homeobox protein Lhx3 (OMCL_OG2_75554)	ENSMUSG00000026934 Lhx3 LIM/homeobox protein Lhx3 (HOMG_7814, I)	ENSMUSG00000026468 Lhx4 LIM/homeobox protein Lhx4 (I, OMCL_OG2_75554); ENSMUSG00000026934 Lhx3 LIM/homeobox protein Lhx3 (OMCL_OG2_75554)	CG6972	CG6972	PAIN	FBgn0039008	CG6972 CG6972	ENSG00000100418 NP_0565191 DJ347H134 protein (COMP)	ENSG00000167280 NP_0010360381 endo-beta-N-acetylglucosaminidase (OMCL_OG2_71252); ENSG00000100418 NP_0565191 DJ347H134 protein (OMCL_OG2_71252)	ENSMUSG00000022472 D15Wsu75e Adult male testis cDNA, RIKEN full-length enriched library, clone:1700013M01 product:hypothetical protein, full insert sequence CRL-1722 L5178Y-R cDNA, RIKEN full-length enriched library, clone: (COMP)	ENSMUSG00000033857 D230014K01Rik endo-beta-N-acetylglucosaminidase (OMCL_OG2_71252); ENSMUSG00000022472 D15Wsu75e Adult male testis cDNA, RIKEN full-length enriched library, clone:1700013M01 product:hypothetical protein, full insert sequence CRL-1722 L5178Y-R cDNA, RIKEN full-length enriched library, clone: (OMCL_OG2_71252)
CG1071	E2f2	BP	FBgn0024371	E2f2 E2F transcription factor 2 negative regulation of DNA replication,oocyte anterior/posterior axis determination,G1/S transition of mitotic cell cycle,oocyte dorsal/ventral axis determination,regulation of transcription,negative regulation of transcription from RNA polymerase II promoter,DNA endoreduplication,negative regulation of transcription,imaginal disc development,oogenesis,endomitotic …	-	ENSG00000133740 E2F5 Transcription factor E2F5 (OMCL_OG2_71951, COMP); ENSG00000205250 E2F4 Transcription factor E2F4 (OMCL_OG2_71951, COMP); ENSG00000007968 E2F2 Transcription factor E2F2 (OMCL_OG2_71951); ENSG00000112242 E2F3 Transcription factor E2F3 (OMCL_OG2_71951)	-	ENSMUSG00000027552 E2f5 Transcription factor E2F5 (OMCL_OG2_71951, COMP); ENSMUSG00000014859 E2f4 E2F transcription factor 4 (OMCL_OG2_71951, COMP); ENSMUSG00000016477 E2f3 Transcription factor E2F3 (OMCL_OG2_71951); ENSMUSG00000018983 E2f2 Transcription factor E2F2 (OMCL_OG2_71951)	CG5473	SP2637	PAIN	FBgn0034371	SP2637 SP2637	ENSG00000157045 NTAN1 Protein N-terminal asparagine amidohydrolase (OMCL_OG2_78753, HOMG_7869, COMP, I)	-	ENSMUSG00000022681 Ntan1 Protein N-terminal asparagine amidohydrolase (OMCL_OG2_78753, HOMG_7869, COMP, I)	-
CG1071	E2f2	BP	FBgn0024371	E2f2 E2F transcription factor 2 negative regulation of DNA replication,oocyte anterior/posterior axis determination,G1/S transition of mitotic cell cycle,oocyte dorsal/ventral axis determination,regulation of transcription,negative regulation of transcription from RNA polymerase II promoter,DNA endoreduplication,negative regulation of transcription,imaginal disc development,oogenesis,endomitotic …	-	ENSG00000133740 E2F5 Transcription factor E2F5 (OMCL_OG2_71951, COMP); ENSG00000205250 E2F4 Transcription factor E2F4 (OMCL_OG2_71951, COMP); ENSG00000007968 E2F2 Transcription factor E2F2 (OMCL_OG2_71951); ENSG00000112242 E2F3 Transcription factor E2F3 (OMCL_OG2_71951)	-	ENSMUSG00000027552 E2f5 Transcription factor E2F5 (OMCL_OG2_71951, COMP); ENSMUSG00000014859 E2f4 E2F transcription factor 4 (OMCL_OG2_71951, COMP); ENSMUSG00000016477 E2f3 Transcription factor E2F3 (OMCL_OG2_71951); ENSMUSG00000018983 E2f2 Transcription factor E2F2 (OMCL_OG2_71951)	CG5643	wdb	PAIN	FBgn0027492	wdb widerborst signal transduction	ENSG00000154001 PPP2R5E Serine/threonine-protein phosphatase 2A 56 kDa regulatory subunit epsilon isoform (I, HOMG_55962)	ENSG00000066027 PPP2R5A Serine/threonine-protein phosphatase 2A 56 kDa regulatory subunit alpha isoform (I, COMP, OMCL_OG2_70981); ENSG00000068971 PPP2R5B Serine/threonine-protein phosphatase 2A 56 kDa regulatory subunit beta isoform (COMP, OMCL_OG2_70981); ENSG00000154001 PPP2R5E Serine/threonine-protein phosphatase 2A 56 kDa regulatory subunit epsilon isoform (COMP, OMCL_OG2_70981); ENSG0000011…	ENSMUSG00000021051 Ppp2r5e Serine/threonine-protein phosphatase 2A 56 kDa regulatory subunit epsilon isoform (I, HOMG_55962)	ENSMUSG00000026626 Ppp2r5a Serine/threonine-protein phosphatase 2A 56 kDa regulatory subunit alpha isoform (I, COMP, OMCL_OG2_70981); ENSMUSG00000021051 Ppp2r5e Serine/threonine-protein phosphatase 2A 56 kDa regulatory subunit epsilon isoform (COMP, OMCL_OG2_70981); ENSMUSG00000024777 Ppp2r5b protein phosphatase 2, regulatory subunit B , beta isoform (COMP, OMCL_OG2_70981); ENSMUSG00000017843 Ppp…
CG1071	E2f2	BP	FBgn0024371	E2f2 E2F transcription factor 2 negative regulation of DNA replication,oocyte anterior/posterior axis determination,G1/S transition of mitotic cell cycle,oocyte dorsal/ventral axis determination,regulation of transcription,negative regulation of transcription from RNA polymerase II promoter,DNA endoreduplication,negative regulation of transcription,imaginal disc development,oogenesis,endomitotic …	-	ENSG00000133740 E2F5 Transcription factor E2F5 (OMCL_OG2_71951, COMP); ENSG00000205250 E2F4 Transcription factor E2F4 (OMCL_OG2_71951, COMP); ENSG00000007968 E2F2 Transcription factor E2F2 (OMCL_OG2_71951); ENSG00000112242 E2F3 Transcription factor E2F3 (OMCL_OG2_71951)	-	ENSMUSG00000027552 E2f5 Transcription factor E2F5 (OMCL_OG2_71951, COMP); ENSMUSG00000014859 E2f4 E2F transcription factor 4 (OMCL_OG2_71951, COMP); ENSMUSG00000016477 E2f3 Transcription factor E2F3 (OMCL_OG2_71951); ENSMUSG00000018983 E2f2 Transcription factor E2F2 (OMCL_OG2_71951)	CG13110	CG13110	PAIN	FBgn0032111	CG13110 CG13110	-	-	-	-
CG1071	E2f2	BP	FBgn0024371	E2f2 E2F transcription factor 2 negative regulation of DNA replication,oocyte anterior/posterior axis determination,G1/S transition of mitotic cell cycle,oocyte dorsal/ventral axis determination,regulation of transcription,negative regulation of transcription from RNA polymerase II promoter,DNA endoreduplication,negative regulation of transcription,imaginal disc development,oogenesis,endomitotic …	-	ENSG00000133740 E2F5 Transcription factor E2F5 (OMCL_OG2_71951, COMP); ENSG00000205250 E2F4 Transcription factor E2F4 (OMCL_OG2_71951, COMP); ENSG00000007968 E2F2 Transcription factor E2F2 (OMCL_OG2_71951); ENSG00000112242 E2F3 Transcription factor E2F3 (OMCL_OG2_71951)	-	ENSMUSG00000027552 E2f5 Transcription factor E2F5 (OMCL_OG2_71951, COMP); ENSMUSG00000014859 E2f4 E2F transcription factor 4 (OMCL_OG2_71951, COMP); ENSMUSG00000016477 E2f3 Transcription factor E2F3 (OMCL_OG2_71951); ENSMUSG00000018983 E2f2 Transcription factor E2F2 (OMCL_OG2_71951)	CG12645	CG12645	PAIN	FBgn0030181	CG12645 CG12645	-	-	-	-
CG1071	E2f2	BP	FBgn0024371	E2f2 E2F transcription factor 2 negative regulation of DNA replication,oocyte anterior/posterior axis determination,G1/S transition of mitotic cell cycle,oocyte dorsal/ventral axis determination,regulation of transcription,negative regulation of transcription from RNA polymerase II promoter,DNA endoreduplication,negative regulation of transcription,imaginal disc development,oogenesis,endomitotic …	-	ENSG00000133740 E2F5 Transcription factor E2F5 (OMCL_OG2_71951, COMP); ENSG00000205250 E2F4 Transcription factor E2F4 (OMCL_OG2_71951, COMP); ENSG00000007968 E2F2 Transcription factor E2F2 (OMCL_OG2_71951); ENSG00000112242 E2F3 Transcription factor E2F3 (OMCL_OG2_71951)	-	ENSMUSG00000027552 E2f5 Transcription factor E2F5 (OMCL_OG2_71951, COMP); ENSMUSG00000014859 E2f4 E2F transcription factor 4 (OMCL_OG2_71951, COMP); ENSMUSG00000016477 E2f3 Transcription factor E2F3 (OMCL_OG2_71951); ENSMUSG00000018983 E2f2 Transcription factor E2F2 (OMCL_OG2_71951)	CG32381	unc-13-4A	PAIN	FBgn0035756	unc-13-4A unc-13-4A synaptic vesicle priming,neurotransmitter secretion	ENSG00000007516 BAIAP3 BAI1-associated protein 3 (I, HOMG_20844)	ENSG00000007516 BAIAP3 BAI1-associated protein 3 (COMP, OMCL_OG2_76911); ENSG00000092929 UNC13D Unc-13 homolog D (COMP, OMCL_OG2_76911)	ENSMUSG00000047507 Baiap3 BAI1-associated protein 3 (I); ENSMUSG00000057948 Unc13d unc-13 homolog D (I)	ENSMUSG00000047507 Baiap3 BAI1-associated protein 3 (COMP, OMCL_OG2_76911); ENSMUSG00000057948 Unc13d unc-13 homolog D (COMP, OMCL_OG2_76911)
CG10814	CG10814	BP	FBgn0033830	CG10814 CG10814 electron transport	-	ENSG00000129151 BBOX1 Gamma-butyrobetaine dioxygenase (I, COMP, OMCL_OG2_75260)	-	ENSMUSG00000041660 Bbox1 Gamma-butyrobetaine dioxygenase (I, COMP)	CG18350	Sxl	PAIN	FBgn0003659	Sxl Sex lethal female germ-line sex determination,germ cell development,regulation of nuclear mRNA splicing, via spliceosome,female sex differentiation,smoothened signaling pathway,sex determination, primary response to X:A ratio,female sex determination,alternative nuclear mRNA splicing, via spliceosome,negative regulation of nuclear mRNA splicing, via spliceosome,somatic sex determination,dosag…	-	-	-	-
CG10882	CG10882	PAIN	FBgn0031408	CG10882 CG10882 intracellular protein transport,G-protein coupled receptor protein signaling pathway,ER to Golgi vesicle-mediated transport	ENSG00000176986 SEC24C Protein transport protein Sec24C (HOMG_3615, I)	ENSG00000150961 SEC24D Protein transport protein Sec24D (I, COMP, OMCL_OG2_72998); ENSG00000176986 SEC24C Protein transport protein Sec24C (COMP, OMCL_OG2_72998)	ENSMUSG00000039367 Sec24c SEC24 related gene family, member C (HOMG_3615, I)	ENSMUSG00000039234 Sec24d SEC24 related gene family, member D (I, COMP, OMCL_OG2_72998); ENSMUSG00000039367 Sec24c SEC24 related gene family, member C (COMP, OMCL_OG2_72998)	CG9184	CG9184	BP	FBgn0035208	CG9184 CG9184	ENSG00000120306 C5orf32 Putative nuclear protein (COMP)	-	ENSMUSG00000046727 0610010O12Rik UPF0467 protein C5orf32 homolog (COMP)	-
CG10882	CG10882	PAIN	FBgn0031408	CG10882 CG10882 intracellular protein transport,G-protein coupled receptor protein signaling pathway,ER to Golgi vesicle-mediated transport	ENSG00000176986 SEC24C Protein transport protein Sec24C (HOMG_3615, I)	ENSG00000150961 SEC24D Protein transport protein Sec24D (I, COMP, OMCL_OG2_72998); ENSG00000176986 SEC24C Protein transport protein Sec24C (COMP, OMCL_OG2_72998)	ENSMUSG00000039367 Sec24c SEC24 related gene family, member C (HOMG_3615, I)	ENSMUSG00000039234 Sec24d SEC24 related gene family, member D (I, COMP, OMCL_OG2_72998); ENSMUSG00000039367 Sec24c SEC24 related gene family, member C (COMP, OMCL_OG2_72998)	CG7113	scu	BP	FBgn0021765	scu scully steroid metabolic process,acyl-CoA metabolic process,fatty acid metabolic process,ecdysone metabolic process,estrogen metabolic process,androgen metabolic process	ENSG00000072506 HSD17B10 3-hydroxyacyl-CoA dehydrogenase type-2 Short-cha (HOMG_68403, OMCL_OG2_72838, COMP, I)	-	ENSMUSG00000025260 Hsd17b10 3-hydroxyacyl-CoA dehydrogenase type-2 (HOMG_68403, OMCL_OG2_72838, COMP, I)	-
CG10882	CG10882	PAIN	FBgn0031408	CG10882 CG10882 intracellular protein transport,G-protein coupled receptor protein signaling pathway,ER to Golgi vesicle-mediated transport	ENSG00000176986 SEC24C Protein transport protein Sec24C (HOMG_3615, I)	ENSG00000150961 SEC24D Protein transport protein Sec24D (I, COMP, OMCL_OG2_72998); ENSG00000176986 SEC24C Protein transport protein Sec24C (COMP, OMCL_OG2_72998)	ENSMUSG00000039367 Sec24c SEC24 related gene family, member C (HOMG_3615, I)	ENSMUSG00000039234 Sec24d SEC24 related gene family, member D (I, COMP, OMCL_OG2_72998); ENSMUSG00000039367 Sec24c SEC24 related gene family, member C (COMP, OMCL_OG2_72998)	CG31362	Jon99Ciii	BP	FBgn0003357	Jon99Ciii Jonah 99Ciii proteolysis,digestion	-	-	-	ENSMUSG00000023433 Ela3 elastase 3, pancreatic (I); ENSMUSG00000062478 Ctrc Chymotrypsin-C precursor (I); ENSMUSG00000058579 Ela2a Elastase-2A precursor (I); ENSMUSG00000031957 Ctrb1 Chymotrypsinogen B precursor (I); ENSMUSG00000031896 Ctrl chymotrypsin-like (I); ENSMUSG00000023031 Ela1 elastase 1, pancreatic (I); ENSMUSG00000078520 A2A9U8_MOUSE Novel protein similar to elastase 3B, pancreatic (I)
CG10882	CG10882	PAIN	FBgn0031408	CG10882 CG10882 intracellular protein transport,G-protein coupled receptor protein signaling pathway,ER to Golgi vesicle-mediated transport	ENSG00000176986 SEC24C Protein transport protein Sec24C (HOMG_3615, I)	ENSG00000150961 SEC24D Protein transport protein Sec24D (I, COMP, OMCL_OG2_72998); ENSG00000176986 SEC24C Protein transport protein Sec24C (COMP, OMCL_OG2_72998)	ENSMUSG00000039367 Sec24c SEC24 related gene family, member C (HOMG_3615, I)	ENSMUSG00000039234 Sec24d SEC24 related gene family, member D (I, COMP, OMCL_OG2_72998); ENSMUSG00000039367 Sec24c SEC24 related gene family, member C (COMP, OMCL_OG2_72998)	CG4027	Act5C	BP	FBgn0000042	Act5C Actin 5C phagocytosis, engulfment,cytoskeleton organization and biogenesis,sperm individualization,cytokinesis	ENSG00000184009 ACTG1 Actin, cytoplasmic 2 (HOMG_74402, I); ENSG00000075624 ACTB Actin, cytoplasmic 1 (I)	ENSG00000169067 NP_0010179921 Actin-like protein (COMP, OMCL_OG2_70676); ENSG00000107796 ACTA2 Actin, aortic smooth muscle (OMCL_OG2_70676); ENSG00000204434 NM_001017421 Actin-like protein (OMCL_OG2_70676); ENSG00000184009 ACTG1 Actin, cytoplasmic 2 (OMCL_OG2_70676); ENSG00000163017 ACTG2 Actin, gamma-enteric smooth muscle (OMCL_OG2_70676); ENSG00000143632 ACTA1 Actin, alpha skeletal muscle (OMCL…	ENSMUSG00000062825 Actg1 Actin, cytoplasmic 2 (HOMG_74402, I); ENSMUSG00000029580 Actb Actin, cytoplasmic 1 (I); MGI:87904 Actb actin, beta (I)	ENSMUSG00000055194 4732495G21Rik RIKEN cDNA 4732495G21 gene , mRNA (COMP, OMCL_OG2_70676); ENSMUSG00000062825 Actg1 Actin, cytoplasmic 2 (OMCL_OG2_70676); ENSMUSG00000059430 Actg2 Actin, gamma-enteric smooth muscle (OMCL_OG2_70676); ENSMUSG00000029580 Actb Actin, cytoplasmic 1 (OMCL_OG2_70676); ENSMUSG00000068614 Actc1 Actin, alpha cardiac muscle 1 (OMCL_OG2_70676); ENSMUSG00000031972 Acta1 Actin…
CG10949	CG10949	BP	FBgn0032858	CG10949 CG10949	-	-	-	-	CG9948	CG9948	PAIN	FBgn0035721	CG9948 CG9948	-	-	-	-
CG10954	Arc-p34	PAIN	FBgn0032859	Arc-p34 Arc-p34 regulation of actin polymerization and/or depolymerization,regulation of actin filament polymerization,regulation of cell shape,cell projection biogenesis,cortical actin cytoskeleton organization and biogenesis	ENSG00000163466 ARPC2 Actin-related protein 2/3 complex subunit 2 (COMP, I, OMCL_OG2_73783, HOMG_4187)	-	ENSMUSG00000006304 Arpc2 Actin-related protein 2/3 complex subunit 2 (COMP, I, OMCL_OG2_73783, HOMG_4187)	-	CG11581	CG11581	BP	FBgn0030540	CG11581 CG11581	-	-	-	-
CG10992	CG10992	PAIN	FBgn0030521	CG10992 CG10992 proteolysis,regulation of catalytic activity,autophagic cell death,salivary gland cell autophagic cell death	ENSG00000164733 CTSB Cathepsin B precursor (COMP, I, HOMG_37550, OMCL_OG2_71626)	-	ENSMUSG00000021939 Ctsb Cathepsin B precursor (COMP, I, HOMG_37550, OMCL_OG2_71626)	-	CG9868	Prosbeta5R1	BP	FBgn0034842	Prosbeta5R1 ProsÎ²5R1 ubiquitin-dependent protein catabolic process	-	ENSG00000100804 PSMB5 Proteasome subunit beta type 5 precursor (COMP, I); ENSG00000204264 PSMB8 Proteasome subunit beta type 8 precursor (COMP, I); ENSG00000206234 PSB8_HUMAN Proteasome subunit beta type 8 precursor (I); ENSG00000129543 NP_0010932501 proteasome subunit beta5t (COMP); ENSG00000206298 PSMB8 Proteasome subunit beta type 8 precursor (I)	-	ENSMUSG00000024338 Psmb8 Proteasome subunit beta type-8 precursor (COMP, I); ENSMUSG00000022193 Psmb5 Proteasome subunit beta type-5 precursor (COMP, I)
CG10992	CG10992	PAIN	FBgn0030521	CG10992 CG10992 proteolysis,regulation of catalytic activity,autophagic cell death,salivary gland cell autophagic cell death	ENSG00000164733 CTSB Cathepsin B precursor (COMP, I, HOMG_37550, OMCL_OG2_71626)	-	ENSMUSG00000021939 Ctsb Cathepsin B precursor (COMP, I, HOMG_37550, OMCL_OG2_71626)	-	CG9930	E5	BP	FBgn0008646	E5 E5 regulation of transcription, DNA-dependent	ENSG00000170370 EMX2 Homeobox protein EMX2 (I); ENSG00000135638 EMX1 Homeobox protein EMX1 (I)	ENSG00000170370 EMX2 Homeobox protein EMX2 (OMCL_OG2_78808)	ENSMUSG00000043969 Emx2 Homeobox protein EMX2 (I)	ENSMUSG00000043969 Emx2 Homeobox protein EMX2 (OMCL_OG2_78808); ENSMUSG00000024986 MGI:1201390 Homeobox protein PRH (I)
CG10992	CG10992	PAIN	FBgn0030521	CG10992 CG10992 proteolysis,regulation of catalytic activity,autophagic cell death,salivary gland cell autophagic cell death	ENSG00000164733 CTSB Cathepsin B precursor (COMP, I, HOMG_37550, OMCL_OG2_71626)	-	ENSMUSG00000021939 Ctsb Cathepsin B precursor (COMP, I, HOMG_37550, OMCL_OG2_71626)	-	CG1472	sec24	BP	FBgn0033460	sec24 sec24 intracellular protein transport,ER to Golgi vesicle-mediated transport	ENSG00000138802 SEC24B Protein transport protein Sec24B (HOMG_55968, I)	ENSG00000113615 SEC24A Protein transport protein Sec24A (OMCL_OG2_71751, I, COMP); ENSG00000138802 SEC24B Protein transport protein Sec24B (OMCL_OG2_71751, COMP)	ENSMUSG00000001052 Sec24b SEC24 related gene family, member B (HOMG_55968, I)	ENSMUSG00000036391 Sec24a Protein transport protein Sec24A (OMCL_OG2_71751, I, COMP); ENSMUSG00000001052 Sec24b SEC24 related gene family, member B (OMCL_OG2_71751, COMP)
CG1101	Aly	PAIN	FBgn0010774	Aly Aly	ENSG00000183684 THOC4 THO complex subunit 4 (HOMG_38099, COMP, I)	ENSG00000183684 THOC4 THO complex subunit 4 (OMCL_OG2_71619)	ENSMUSG00000025134 Thoc4 THO complex subunit 4 (HOMG_38099, I)	ENSMUSG00000060244 Refbp2 RNA and export factor-binding protein 2 (I, COMP, OMCL_OG2_71619); ENSMUSG00000025134 Thoc4 THO complex subunit 4 (COMP, OMCL_OG2_71619); MGI:3646823 EG667532 predicted gene, EG667532 (I); MGI:3646684 EG624262 predicted gene, EG624262 (I); MGI:3643661 EG667695 predicted gene, EG667695 (I); MGI:3649020 EG435615 predicted gene, EG435615 (I); MGI:3644918 (I); MGI:3643200 (I…	CG10388	Ubx	BP	FBgn0003944	Ubx Ultrabithorax regulation of imaginal disc growth,open tracheal system development,imaginal disc-derived leg morphogenesis,specification of organ identity,mesodermal cell fate specification,specification of segmental identity, thorax,regulation of transcription, DNA-dependent,regulation of transcription from RNA polymerase II promoter,haltere development,dorsal vessel aortic cell fate commitme…	-	-	-	-
CG11092	CG11092	BP	FBgn0027537	CG11092 CG11092 transport	-	ENSG00000102900 NUP93 Nuclear pore complex protein Nup93 (OMCL_OG2_73884, I, COMP)	-	ENSMUSG00000032939 Nup93 Nuclear pore complex protein Nup93 (OMCL_OG2_73884, I, COMP)	CG9983	Hrb98DE	PAIN	FBgn0001215	Hrb98DE Heterogeneous nuclear ribonucleoprotein at 98DE	ENSG00000170144 HNRPA3 Heterogeneous nuclear ribonucleoprotein A3 (HOMG_62463)	ENSG00000135486 HNRNPA1 Heterogeneous nuclear ribonucleoprotein A1 (OMCL_OG2_71035, I); ENSG00000170144 HNRPA3 Heterogeneous nuclear ribonucleoprotein A3 (OMCL_OG2_71035, I); ENSG00000122566 HNRNPA2B1 Heterogeneous nuclear ribonucleoproteins A2/B1 (OMCL_OG2_71035, I); ENSG00000196682 \N \N (I); ENSG00000205412 \N \N (I); ENSG00000176825 (I); ENSG00000176757 (I); ENSG00000181836 \N \N (I); ENSG000…	ENSMUSG00000059005 Hnrpa3 Heterogeneous nuclear ribonucleoprotein A3 (HOMG_62463)	ENSMUSG00000004980 Hnrnpa2b1 Heterogeneous nuclear ribonucleoproteins A2/B1 (OMCL_OG2_71035, I); ENSMUSG00000059005 Hnrpa3 Heterogeneous nuclear ribonucleoprotein A3 (OMCL_OG2_71035, I); ENSMUSG00000046434 Hnrnpa1 Heterogeneous nuclear ribonucleoprotein A1 (OMCL_OG2_71035, I); MGI:3644479 Hnrnpa1l2 heterogeneous nuclear ribonucleoprotein A1-like 2 (I); ENSMUSG00000060989 \N \N (I); MGI:3645633 EG…
CG11092	CG11092	BP	FBgn0027537	CG11092 CG11092 transport	-	ENSG00000102900 NUP93 Nuclear pore complex protein Nup93 (OMCL_OG2_73884, I, COMP)	-	ENSMUSG00000032939 Nup93 Nuclear pore complex protein Nup93 (OMCL_OG2_73884, I, COMP)	CG3612	blw	PAIN	FBgn0011211	blw bellwether spermatid development,phagocytosis, engulfment,growth,proton transport,ATP synthesis coupled proton transport	ENSG00000152234 ATP5A1 ATP synthase subunit alpha, mitochondrial precursor (OMCL_OG2_71070, HOMG_2985, COMP, I)	-	ENSMUSG00000025428 Atp5a1 ATP synthase subunit alpha, mitochondrial precursor (OMCL_OG2_71070, HOMG_2985, COMP, I)	-
CG11138	CG11138	BP	FBgn0030400	CG11138 CG11138	ENSG00000119669 C14orf4 RING finger protein C14orf4 (HOMG_11555); ENSG00000170604 IRF2BP1 interferon regulatory factor 2 binding protein 1 (I)	ENSG00000119669 C14orf4 RING finger protein C14orf4 (OMCL_OG2_75881, I, COMP); ENSG00000168264 IRF2BP2 interferon regulatory factor 2 binding protein 2 isoform B (OMCL_OG2_75881, COMP); ENSG00000170604 IRF2BP1 interferon regulatory factor 2 binding protein 1 (COMP)	ENSMUSG00000034168 6430527G18Rik RING finger protein C14orf4 homolog (HOMG_11555, I); ENSMUSG00000044030 Irf2bp1 interferon regulatory factor 2 binding protein 1 (I)	ENSMUSG00000034168 6430527G18Rik RING finger protein C14orf4 homolog (OMCL_OG2_75881, I, COMP); ENSMUSG00000044030 Irf2bp1 interferon regulatory factor 2 binding protein 1 (I, COMP); ENSMUSG00000051495 Irf2bp2 0 day neonate eyeball cDNA, RIKEN full-length enriched library, clone:E130305N23 product:BRAIN MY039 PROTEIN homolog (OMCL_OG2_75881, COMP)	CG10882	CG10882	PAIN	FBgn0031408	CG10882 CG10882 intracellular protein transport,G-protein coupled receptor protein signaling pathway,ER to Golgi vesicle-mediated transport	ENSG00000176986 SEC24C Protein transport protein Sec24C (HOMG_3615, I)	ENSG00000150961 SEC24D Protein transport protein Sec24D (I, COMP, OMCL_OG2_72998); ENSG00000176986 SEC24C Protein transport protein Sec24C (COMP, OMCL_OG2_72998)	ENSMUSG00000039367 Sec24c SEC24 related gene family, member C (HOMG_3615, I)	ENSMUSG00000039234 Sec24d SEC24 related gene family, member D (I, COMP, OMCL_OG2_72998); ENSMUSG00000039367 Sec24c SEC24 related gene family, member C (COMP, OMCL_OG2_72998)
CG11138	CG11138	BP	FBgn0030400	CG11138 CG11138	ENSG00000119669 C14orf4 RING finger protein C14orf4 (HOMG_11555); ENSG00000170604 IRF2BP1 interferon regulatory factor 2 binding protein 1 (I)	ENSG00000119669 C14orf4 RING finger protein C14orf4 (OMCL_OG2_75881, I, COMP); ENSG00000168264 IRF2BP2 interferon regulatory factor 2 binding protein 2 isoform B (OMCL_OG2_75881, COMP); ENSG00000170604 IRF2BP1 interferon regulatory factor 2 binding protein 1 (COMP)	ENSMUSG00000034168 6430527G18Rik RING finger protein C14orf4 homolog (HOMG_11555, I); ENSMUSG00000044030 Irf2bp1 interferon regulatory factor 2 binding protein 1 (I)	ENSMUSG00000034168 6430527G18Rik RING finger protein C14orf4 homolog (OMCL_OG2_75881, I, COMP); ENSMUSG00000044030 Irf2bp1 interferon regulatory factor 2 binding protein 1 (I, COMP); ENSMUSG00000051495 Irf2bp2 0 day neonate eyeball cDNA, RIKEN full-length enriched library, clone:E130305N23 product:BRAIN MY039 PROTEIN homolog (OMCL_OG2_75881, COMP)	CG5380	CG5380	PAIN	FBgn0038951	CG5380 CG5380 transcription,transcription from RNA polymerase III promoter	ENSG00000132664 POLR3F DNA-directed RNA polymerase III subunit RPC6 (HOMG_4722, COMP, I, OMCL_OG2_72557)	-	ENSMUSG00000027427 Polr3f DNA-directed RNA polymerase III subunit RPC6 (HOMG_4722, COMP, I, OMCL_OG2_72557)	-
CG11164	CG11164	BP	FBgn0030507	CG11164 CG11164	ENSG00000136104 RNASEH2B Ribonuclease H2 subunit B (OMCL_OG2_76599, HOMG_41572, COMP, I)	-	ENSMUSG00000021932 Rnaseh2b Ribonuclease H2 subunit B (OMCL_OG2_76599, HOMG_41572, COMP, I)	-	CG3421	RhoGAP93B	PAIN	FBgn0038853	RhoGAP93B RhoGAP93B signal transduction,axon guidance	ENSG00000147799 K1688_HUMAN \N (OMCL_OG2_75030, I)	-	ENSMUSG00000033697 D15Wsu169e Protein KIAA1688 (OMCL_OG2_75030, I)	-
CG11164	CG11164	BP	FBgn0030507	CG11164 CG11164	ENSG00000136104 RNASEH2B Ribonuclease H2 subunit B (OMCL_OG2_76599, HOMG_41572, COMP, I)	-	ENSMUSG00000021932 Rnaseh2b Ribonuclease H2 subunit B (OMCL_OG2_76599, HOMG_41572, COMP, I)	-	CG11893	CG11893	PAIN	FBgn0039316	CG11893 CG11893	-	-	-	-
CG11164	CG11164	BP	FBgn0030507	CG11164 CG11164	ENSG00000136104 RNASEH2B Ribonuclease H2 subunit B (OMCL_OG2_76599, HOMG_41572, COMP, I)	-	ENSMUSG00000021932 Rnaseh2b Ribonuclease H2 subunit B (OMCL_OG2_76599, HOMG_41572, COMP, I)	-	CG15167	CG15167	PAIN	FBgn0032709	CG15167 CG15167	-	-	-	-
CG11164	CG11164	BP	FBgn0030507	CG11164 CG11164	ENSG00000136104 RNASEH2B Ribonuclease H2 subunit B (OMCL_OG2_76599, HOMG_41572, COMP, I)	-	ENSMUSG00000021932 Rnaseh2b Ribonuclease H2 subunit B (OMCL_OG2_76599, HOMG_41572, COMP, I)	-	CG7856	CG7856	PAIN	FBgn0033056	CG7856 CG7856	-	-	-	-
CG11164	CG11164	BP	FBgn0030507	CG11164 CG11164	ENSG00000136104 RNASEH2B Ribonuclease H2 subunit B (OMCL_OG2_76599, HOMG_41572, COMP, I)	-	ENSMUSG00000021932 Rnaseh2b Ribonuclease H2 subunit B (OMCL_OG2_76599, HOMG_41572, COMP, I)	-	CG18350	Sxl	PAIN	FBgn0003659	Sxl Sex lethal female germ-line sex determination,germ cell development,regulation of nuclear mRNA splicing, via spliceosome,female sex differentiation,smoothened signaling pathway,sex determination, primary response to X:A ratio,female sex determination,alternative nuclear mRNA splicing, via spliceosome,negative regulation of nuclear mRNA splicing, via spliceosome,somatic sex determination,dosag…	-	-	-	-
CG11166	CG11166	BP	FBgn0033166	CG11166 CG11166	ENSG00000144597 EAF1 ELL-associated factor 1 (I)	ENSG00000145088 EAF2 ELL-associated factor 2 (I, COMP, OMCL_OG2_74987); ENSG00000144597 EAF1 ELL-associated factor 1 (COMP, OMCL_OG2_74987)	ENSMUSG00000022838 Eaf2 ELL-associated factor 2 (I); ENSMUSG00000021890 Eaf1 ELL-associated factor 1 (I)	ENSMUSG00000022838 Eaf2 ELL-associated factor 2 (COMP, OMCL_OG2_74987); ENSMUSG00000021890 Eaf1 ELL-associated factor 1 (COMP, OMCL_OG2_74987)	CG6930	l(3)neo38	PAIN	FBgn0086910	l(3)neo38 lethal (3) neo38 biological_process	ENSG00000167685 ZNF444 Zinc finger protein 444 (I)	ENSG00000197657 ZNF323 Zinc finger protein 323 (I); ENSG00000155592 ZKSCAN2 Zinc finger protein with KRAB and SCAN domains 2 (I); ENSG00000186376 ZNF75 Zinc finger protein 75 (I); ENSG00000140987 ZNF434 Zinc finger protein 434 (I); ENSG00000196812 ZSCAN16 Zinc finger and SCAN domain-containing protein 16 (I); ENSG00000100105 PATZ1 POZ-, AT hook-, and zinc finger-containing protein 1 Zinc finger a…	-	ENSMUSG00000030678 Maz Myc-associated zinc finger protein (COMP); ENSMUSG00000018377 Vezf1 vascular endothelial zinc finger 1 (COMP); ENSMUSG00000020453 Patz1 POZ and AT hook containing zinc finger 1 (COMP)
CG11166	CG11166	BP	FBgn0033166	CG11166 CG11166	ENSG00000144597 EAF1 ELL-associated factor 1 (I)	ENSG00000145088 EAF2 ELL-associated factor 2 (I, COMP, OMCL_OG2_74987); ENSG00000144597 EAF1 ELL-associated factor 1 (COMP, OMCL_OG2_74987)	ENSMUSG00000022838 Eaf2 ELL-associated factor 2 (I); ENSMUSG00000021890 Eaf1 ELL-associated factor 1 (I)	ENSMUSG00000022838 Eaf2 ELL-associated factor 2 (COMP, OMCL_OG2_74987); ENSMUSG00000021890 Eaf1 ELL-associated factor 1 (COMP, OMCL_OG2_74987)	CG4609	fax	PAIN	FBgn0014163	fax failed axon connections axonogenesis	ENSG00000146267 C6orf168 Uncharacterized protein C6orf168 (OMCL_OG2_74720, COMP, I)	-	ENSMUSG00000028246 6230409E13Rik Mammary gland RCB-0526 Jyg-MC cDNA, RIKEN full-length enriched library, clone:G830005H23 product:hypothetical Glutathione S- transferase, C-terminal-like containing protein, full insert sequence (OMCL_OG2_74720, COMP, I)	-
CG11183	Dcp1	PAIN	FBgn0034921	Dcp1 Decapping protein 1 mRNA catabolic process, nonsense-mediated decay,gene silencing by miRNA,tRNA aminoacylation for protein translation	55802 DCP1A (HOMG_10178); ENSG00000151065 DCP1B mRNA-decapping enzyme 1B (I)	ENSG00000162290 DCP1A mRNA-decapping enzyme 1A (OMCL_OG2_72695, I, COMP); ENSG00000151065 DCP1B mRNA-decapping enzyme 1B (OMCL_OG2_72695, COMP)	ENSMUSG00000021962 Dcp1a mRNA-decapping enzyme 1A (I, HOMG_10178); ENSMUSG00000041477 Dcp1b mRNA-decapping enzyme 1B (I)	ENSMUSG00000041477 Dcp1b mRNA-decapping enzyme 1B (OMCL_OG2_72695, I, COMP); ENSMUSG00000021962 Dcp1a mRNA-decapping enzyme 1A (OMCL_OG2_72695, COMP)	CG8604	Amph	BP	FBgn0027356	Amph Amphiphysin endocytosis,exocytosis,rhabdomere membrane biogenesis,protein localization,rhabdomere development,synaptic vesicle endocytosis,regulation of muscle contraction,neurotransmitter secretion	ENSG00000136717 BIN1 Myc box-dependent-interacting protein 1 (HOMG_62497, OMCL_OG2_80909); ENSG00000078053 AMPH Amphiphysin (I)	ENSG00000136717 BIN1 Myc box-dependent-interacting protein 1 (I, COMP); ENSG00000078053 AMPH Amphiphysin (COMP); ENSG00000110934 BIN2 Bridging integrator 2 (COMP)	ENSMUSG00000024381 Bin1 Myc box-dependent-interacting protein 1 (HOMG_62497, OMCL_OG2_80909); ENSMUSG00000021314 Amph Amphiphysin (I)	ENSMUSG00000024381 Bin1 Myc box-dependent-interacting protein 1 (I, COMP); ENSMUSG00000075411 \N \N (COMP); ENSMUSG00000021314 Amph Amphiphysin (COMP)
CG11183	Dcp1	PAIN	FBgn0034921	Dcp1 Decapping protein 1 mRNA catabolic process, nonsense-mediated decay,gene silencing by miRNA,tRNA aminoacylation for protein translation	55802 DCP1A (HOMG_10178); ENSG00000151065 DCP1B mRNA-decapping enzyme 1B (I)	ENSG00000162290 DCP1A mRNA-decapping enzyme 1A (OMCL_OG2_72695, I, COMP); ENSG00000151065 DCP1B mRNA-decapping enzyme 1B (OMCL_OG2_72695, COMP)	ENSMUSG00000021962 Dcp1a mRNA-decapping enzyme 1A (I, HOMG_10178); ENSMUSG00000041477 Dcp1b mRNA-decapping enzyme 1B (I)	ENSMUSG00000041477 Dcp1b mRNA-decapping enzyme 1B (OMCL_OG2_72695, I, COMP); ENSMUSG00000021962 Dcp1a mRNA-decapping enzyme 1A (OMCL_OG2_72695, COMP)	CG7360	Nup58	BP	FBgn0038722	Nup58 Nup58 nucleocytoplasmic transport	ENSG00000139496 NUPL1 Nucleoporin p58/p45 (COMP, I, OMCL_OG2_77516, HOMG_40924)	-	ENSMUSG00000063895 Nupl1 Nucleoporin p58/p45 (COMP, I, OMCL_OG2_77516, HOMG_40924)	-
CG11194	Hey	BP	FBgn0027788	Hey Hairy/E(spl)-related with YRPW motif negative regulation of Notch signaling pathway,regulation of transcription, DNA-dependent	ENSG00000135547 HEY2 Hairy/enhancer-of-split related with YRPW motif protein 2 Protein (HOMG_22705, I, OMCL_OG2_88980)	ENSG00000163909 HEYL Hairy/enhancer-of-split related with YRPW motif-like protein (I, COMP); ENSG00000164683 HEY1 Hairy/enhancer-of-split related with YRPW motif protein 1 (I, COMP); ENSG00000135547 HEY2 Hairy/enhancer-of-split related with YRPW motif protein 2 Protein (COMP)	ENSMUSG00000019789 Hey2 Hairy/enhancer-of-split related with YRPW motif protein 2 (HOMG_22705, OMCL_OG2_88980); ENSMUSG00000040289 Hey1 Hairy/enhancer-of-split related with YRPW motif protein 1 (I)	ENSMUSG00000032744 Heyl Hairy/enhancer-of-split related with YRPW motif-like protein (I, COMP); ENSMUSG00000019789 Hey2 Hairy/enhancer-of-split related with YRPW motif protein 2 (I, COMP); ENSMUSG00000040289 Hey1 Hairy/enhancer-of-split related with YRPW motif protein 1 (COMP)	CG18816	Tsp42Eb	PAIN	FBgn0042086	Tsp42Eb Tetraspanin 42Eb	-	-	-	-
CG11194	Hey	BP	FBgn0027788	Hey Hairy/E(spl)-related with YRPW motif negative regulation of Notch signaling pathway,regulation of transcription, DNA-dependent	ENSG00000135547 HEY2 Hairy/enhancer-of-split related with YRPW motif protein 2 Protein (HOMG_22705, I, OMCL_OG2_88980)	ENSG00000163909 HEYL Hairy/enhancer-of-split related with YRPW motif-like protein (I, COMP); ENSG00000164683 HEY1 Hairy/enhancer-of-split related with YRPW motif protein 1 (I, COMP); ENSG00000135547 HEY2 Hairy/enhancer-of-split related with YRPW motif protein 2 Protein (COMP)	ENSMUSG00000019789 Hey2 Hairy/enhancer-of-split related with YRPW motif protein 2 (HOMG_22705, OMCL_OG2_88980); ENSMUSG00000040289 Hey1 Hairy/enhancer-of-split related with YRPW motif protein 1 (I)	ENSMUSG00000032744 Heyl Hairy/enhancer-of-split related with YRPW motif-like protein (I, COMP); ENSMUSG00000019789 Hey2 Hairy/enhancer-of-split related with YRPW motif protein 2 (I, COMP); ENSMUSG00000040289 Hey1 Hairy/enhancer-of-split related with YRPW motif protein 1 (COMP)	CG7187	Ssdp	PAIN	FBgn0011481	Ssdp Sequence-specific single-stranded DNA-binding protein regulation of transcription	ENSG00000157216 SSBP3 Single-stranded DNA-binding protein 3 (I, HOMG_23411)	ENSG00000145687 SSBP2 Single-stranded DNA-binding protein 2 (OMCL_OG2_75367, I); ENSG00000157216 SSBP3 Single-stranded DNA-binding protein 3 (OMCL_OG2_75367); ENSG00000130511 SSBP4 Single-stranded DNA-binding protein 4 (I)	ENSMUSG00000061887 Ssbp3 Single-stranded DNA-binding protein 3 (I, HOMG_23411)	ENSMUSG00000003992 Ssbp2 Single-stranded DNA-binding protein 2 (OMCL_OG2_75367, I); ENSMUSG00000070003 Ssbp4 single stranded DNA binding protein 4 (I); ENSMUSG00000061887 Ssbp3 Single-stranded DNA-binding protein 3 (OMCL_OG2_75367); MGI:1914220 Ssbp2 single-stranded DNA binding protein 2 (I)
CG11194	Hey	BP	FBgn0027788	Hey Hairy/E(spl)-related with YRPW motif negative regulation of Notch signaling pathway,regulation of transcription, DNA-dependent	ENSG00000135547 HEY2 Hairy/enhancer-of-split related with YRPW motif protein 2 Protein (HOMG_22705, I, OMCL_OG2_88980)	ENSG00000163909 HEYL Hairy/enhancer-of-split related with YRPW motif-like protein (I, COMP); ENSG00000164683 HEY1 Hairy/enhancer-of-split related with YRPW motif protein 1 (I, COMP); ENSG00000135547 HEY2 Hairy/enhancer-of-split related with YRPW motif protein 2 Protein (COMP)	ENSMUSG00000019789 Hey2 Hairy/enhancer-of-split related with YRPW motif protein 2 (HOMG_22705, OMCL_OG2_88980); ENSMUSG00000040289 Hey1 Hairy/enhancer-of-split related with YRPW motif protein 1 (I)	ENSMUSG00000032744 Heyl Hairy/enhancer-of-split related with YRPW motif-like protein (I, COMP); ENSMUSG00000019789 Hey2 Hairy/enhancer-of-split related with YRPW motif protein 2 (I, COMP); ENSMUSG00000040289 Hey1 Hairy/enhancer-of-split related with YRPW motif protein 1 (COMP)	CG10711	CG10711	PAIN	FBgn0086785	Vps36 Vps36	ENSG00000136100 VPS36 Vacuolar protein sorting-associated protein 36 (COMP, I, HOMG_9374, OMCL_OG2_73546)	-	ENSMUSG00000031479 Vps36 Vacuolar protein-sorting-associated protein 36 (COMP, I, HOMG_9374, OMCL_OG2_73546)	-
CG11265	CG11265	BP	FBgn0030049	CG11265 CG11265 sister chromatid cohesion	ENSG00000112941 POLS DNA polymerase sigma (HOMG_5089); ENSG00000121274 PAPD5 PAP associated domain containing 5 isoform a (I)	ENSG00000112941 POLS DNA polymerase sigma (OMCL_OG2_71489, I, COMP); ENSG00000121274 PAPD5 PAP associated domain containing 5 isoform a (OMCL_OG2_71489, COMP)	ENSMUSG00000036779 Papd5 PAP-associated domain-containing protein 5 (I); ENSMUSG00000034575 Pols DNA polymerase sigma (HOMG_5089)	ENSMUSG00000034575 Pols DNA polymerase sigma (OMCL_OG2_71489, I, COMP); ENSMUSG00000036779 Papd5 PAP-associated domain-containing protein 5 (OMCL_OG2_71489, COMP)	CG6673	CG6673	PAIN	FBgn0035906	CG6673 CG6673 response to oxidative stress,metabolic process,determination of adult life span	-	ENSG00000148834 GSTO1 Glutathione transferase omega-1 (OMCL_OG2_73472, COMP, I); ENSG00000186110 \N \N (OMCL_OG2_73472, I); ENSG00000065621 GSTO2 Glutathione transferase omega-2 (COMP, I)	-	ENSMUSG00000025068 Gsto1 Glutathione transferase omega-1 (OMCL_OG2_73472, COMP, I); ENSMUSG00000025069 Gsto2 Glutathione transferase omega-2 (COMP, I)
CG11271	RpS12	BP	FBgn0014027	RpS12 Ribosomal protein S12 translation	ENSG00000112306 RPS12 40S ribosomal protein S12 (COMP, I)	ENSG00000119826 \N \N (I); ENSG00000171579 \N \N (I); ENSG00000170250 (I)	MGI:3646874 EG665463 predicted gene, EG665463 (I); 670832 LOC670832 (HOMG_104001); ENSMUSG00000069862 Rps12 40S ribosomal protein S12 (I); MGI:3646126 EG434843 predicted gene, EG434843 (I); MGI:3649140 EG665579 predicted gene, EG665579 (I); ENSMUSG00000067038 Rps12 40S ribosomal protein S12 (I); MGI:3645463 EG665522 predicted gene, EG665522 (I); ENSMUSG00000061983 Rps12 40S ribosomal protein S12 …	ENSMUSG00000058518 \N \N (I, COMP); ENSMUSG00000059333 \N \N (I, COMP); ENSMUSG00000069540 EG237433 40S ribosomal protein S12 (I, COMP); ENSMUSG00000078120 \N \N (I, COMP); MGI:3643035 EG546371 predicted gene, EG546371 (I); MGI:3645658 (I); ENSMUSG00000069862 Rps12 40S ribosomal protein S12 (COMP); MGI:3645883 EG626048 predicted gene, EG626048 (I); ENSMUSG00000067038 Rps12 40S ribosomal protein S…	CG10988	l(1)dd4	PAIN	FBgn0001612	l(1)dd4 lethal (1) discs degenerate 4 meiosis,microtubule nucleation,microtubule-based process,centrosome organization and biogenesis,mitotic spindle organization and biogenesis,anaphase,meiosis I	ENSG00000126216 TUBGCP3 Gamma-tubulin complex component 3 (HOMG_4609, COMP, I, OMCL_OG2_72719)	-	ENSMUSG00000000759 Tubgcp3 Gamma-tubulin complex component 3 (HOMG_4609, COMP, I, OMCL_OG2_72719)	-
CG11271	RpS12	BP	FBgn0014027	RpS12 Ribosomal protein S12 translation	ENSG00000112306 RPS12 40S ribosomal protein S12 (COMP, I)	ENSG00000119826 \N \N (I); ENSG00000171579 \N \N (I); ENSG00000170250 (I)	MGI:3646874 EG665463 predicted gene, EG665463 (I); 670832 LOC670832 (HOMG_104001); ENSMUSG00000069862 Rps12 40S ribosomal protein S12 (I); MGI:3646126 EG434843 predicted gene, EG434843 (I); MGI:3649140 EG665579 predicted gene, EG665579 (I); ENSMUSG00000067038 Rps12 40S ribosomal protein S12 (I); MGI:3645463 EG665522 predicted gene, EG665522 (I); ENSMUSG00000061983 Rps12 40S ribosomal protein S12 …	ENSMUSG00000058518 \N \N (I, COMP); ENSMUSG00000059333 \N \N (I, COMP); ENSMUSG00000069540 EG237433 40S ribosomal protein S12 (I, COMP); ENSMUSG00000078120 \N \N (I, COMP); MGI:3643035 EG546371 predicted gene, EG546371 (I); MGI:3645658 (I); ENSMUSG00000069862 Rps12 40S ribosomal protein S12 (COMP); MGI:3645883 EG626048 predicted gene, EG626048 (I); ENSMUSG00000067038 Rps12 40S ribosomal protein S…	CG3613	qkr58E-1	PAIN	FBgn0022986	qkr58E-1 quaking related 58E-1	ENSG00000112232 KHDRBS2 KH domain-containing, RNA-binding, signal transduction-associated protein 2 (HOMG_15772)	ENSG00000131773 KHDRBS3 KH domain-containing, RNA-binding, signal transduction-associated protein 3 (OMCL_OG2_77122, COMP, I); ENSG00000112232 KHDRBS2 KH domain-containing, RNA-binding, signal transduction-associated protein 2 (OMCL_OG2_77122, COMP, I); ENSG00000121774 KHDRBS1 KH domain-containing, RNA-binding, signal transduction-associated protein 1 (COMP, I)	ENSMUSG00000026058 Khdrbs2 KH domain-containing, RNA-binding, signal transduction-associated protein 2 (HOMG_15772)	ENSMUSG00000026058 Khdrbs2 KH domain-containing, RNA-binding, signal transduction-associated protein 2 (OMCL_OG2_77122, COMP, I); ENSMUSG00000022332 Khdrbs3 KH domain-containing, RNA-binding, signal transduction-associated protein 3 (OMCL_OG2_77122, COMP, I); ENSMUSG00000028790 Khdrbs1 KH domain-containing, RNA-binding, signal transduction-associated protein 1 (COMP, I)
CG11275	CG11275	BP	FBgn0034706	CG11275 CG11275	-	-	-	-	CG4799	Pen	PAIN	FBgn0011823	Pen Pendulin protein import into nucleus, docking,sperm individualization,gravitaxis,cell proliferation,NLS-bearing substrate import into nucleus,lymph gland development,cytoplasmic transport,protein import into nucleus,cytoplasmic transport, nurse cell to oocyte,ovarian ring canal formation	ENSG00000182481 KPNA2 Importin subunit alpha-2 (OMCL_OG2_76621, I)	ENSG00000182481 KPNA2 Importin subunit alpha-2 (HOMG_1708, COMP); ENSG00000185467 A4D277_HUMAN Similar to importin alpha 1b (I, COMP); ENSG00000214180 \N \N (COMP); ENSG00000215769 IMA2_HUMAN Importin subunit alpha-2 (COMP); ENSG00000214035 NP_0010390111 similar to Importin alpha-2 subunit , mRNA (COMP); 728860 LOC728860 (HOMG_1708)	ENSMUSG00000018362 Kpna2 Importin subunit alpha-2 (I)	ENSMUSG00000018362 Kpna2 Importin subunit alpha-2 (OMCL_OG2_76621, HOMG_1708, COMP); ENSMUSG00000050278 (OMCL_OG2_76621); ENSMUSG00000069083 \N \N (OMCL_OG2_76621); ENSMUSG00000038770 AW146299 expressed sequence AW146299 , mRNA (COMP); 100043906 LOC100043906 (HOMG_1708); 100039592 LOC100039592 (HOMG_1708); ENSMUSG00000066878 \N \N (OMCL_OG2_76621)
CG11275	CG11275	BP	FBgn0034706	CG11275 CG11275	-	-	-	-	CG5134	MED9	PAIN	FBgn0034311	MED9 Mediator complex subunit 9	ENSG00000141026 MED9 mediator complex subunit 9 (COMP)	-	ENSMUSG00000061650 Med9 Mediator of RNA polymerase II transcription subunit 9 (COMP)	-
CG11275	CG11275	BP	FBgn0034706	CG11275 CG11275	-	-	-	-	CG10711	CG10711	PAIN	FBgn0086785	Vps36 Vps36	ENSG00000136100 VPS36 Vacuolar protein sorting-associated protein 36 (COMP, I, HOMG_9374, OMCL_OG2_73546)	-	ENSMUSG00000031479 Vps36 Vacuolar protein-sorting-associated protein 36 (COMP, I, HOMG_9374, OMCL_OG2_73546)	-
CG11278	Syx13	BP	FBgn0036341	Syx13 Syntaxin 13 cytokinesis after mitosis,male meiosis,intracellular protein transport,female meiosis,mitosis,vesicle-mediated transport,cytokinesis after meiosis I,synaptic vesicle docking during exocytosis,neurotransmitter secretion	-	ENSG00000079950 STX7 Syntaxin-7 (OMCL_OG2_71975); ENSG00000117758 STX12 Syntaxin-12 (OMCL_OG2_71975)	-	ENSMUSG00000019998 Stx7 Syntaxin-7 (OMCL_OG2_71975); ENSMUSG00000028879 Stx12 Syntaxin-12 (OMCL_OG2_71975)	CG1966	Acf1	PAIN	FBgn0027620	Acf1 ATP-dependent chromatin assembly factor large subunit nucleosome positioning,chromatin assembly or disassembly,neuron development,dendrite morphogenesis,regulation of transcription, DNA-dependent,nucleosome mobilization,nucleosome assembly,muscle development,epidermis development	ENSG00000198604 BAZ1A Bromodomain adjacent to zinc finger domain protein 1A WCRF18 (HOMG_45654, I, OMCL_OG2_78483)	-	ENSMUSG00000035021 Baz1a Bromodomain adjacent to zinc finger domain protein 1A (HOMG_45654, I, OMCL_OG2_78483)	-
CG11326	Tsp	BP	FBgn0031850	Tsp Thrombospondin cell adhesion,cell adhesion mediated by integrin,muscle development	ENSG00000105664 COMP Cartilage oligomeric matrix protein precursor (I, HOMG_74)	ENSG00000169231 THBS3 Thrombospondin-3 precursor (OMCL_OG2_72270, I); ENSG00000113296 THBS4 Thrombospondin-4 precursor (OMCL_OG2_72270, I); ENSG00000186340 THBS2 Thrombospondin-2 precursor (OMCL_OG2_72270); ENSG00000137801 THBS1 Thrombospondin-1 precursor (OMCL_OG2_72270); ENSG00000105664 COMP Cartilage oligomeric matrix protein precursor (OMCL_OG2_72270)	ENSMUSG00000031849 Comp Cartilage oligomeric matrix protein precursor (I, HOMG_74)	ENSMUSG00000028047 Thbs3 Thrombospondin-3 precursor (OMCL_OG2_72270, I); ENSMUSG00000021702 Thbs4 Thrombospondin-4 precursor (OMCL_OG2_72270, I); ENSMUSG00000023885 Thbs2 Thrombospondin-2 precursor (OMCL_OG2_72270); ENSMUSG00000040152 Thbs1 Thrombospondin-1 precursor (OMCL_OG2_72270); ENSMUSG00000031849 Comp Cartilage oligomeric matrix protein precursor (OMCL_OG2_72270)	CG34401	CG34401	PAIN	FBgn0085430	CG34401	ENSG00000214655 KIAA0913 \N (COMP); 23053 KIAA0913 (HOMG_34313); ENSG00000162415 ZSWIM5 Zinc finger SWIM domain-containing protein 5 (I)	ENSG00000130449 ZSWIM6 Zinc finger SWIM domain-containing protein 6 (I); ENSG00000132003 ZSWIM4 Zinc finger SWIM domain-containing protein 4 (I)	ENSMUSG00000021819 2310021P13Rik Zinc finger SWIM domain-containing protein KIAA0913 (HOMG_34313, COMP, I, OMCL_OG2_76846)	-
CG11326	Tsp	BP	FBgn0031850	Tsp Thrombospondin cell adhesion,cell adhesion mediated by integrin,muscle development	ENSG00000105664 COMP Cartilage oligomeric matrix protein precursor (I, HOMG_74)	ENSG00000169231 THBS3 Thrombospondin-3 precursor (OMCL_OG2_72270, I); ENSG00000113296 THBS4 Thrombospondin-4 precursor (OMCL_OG2_72270, I); ENSG00000186340 THBS2 Thrombospondin-2 precursor (OMCL_OG2_72270); ENSG00000137801 THBS1 Thrombospondin-1 precursor (OMCL_OG2_72270); ENSG00000105664 COMP Cartilage oligomeric matrix protein precursor (OMCL_OG2_72270)	ENSMUSG00000031849 Comp Cartilage oligomeric matrix protein precursor (I, HOMG_74)	ENSMUSG00000028047 Thbs3 Thrombospondin-3 precursor (OMCL_OG2_72270, I); ENSMUSG00000021702 Thbs4 Thrombospondin-4 precursor (OMCL_OG2_72270, I); ENSMUSG00000023885 Thbs2 Thrombospondin-2 precursor (OMCL_OG2_72270); ENSMUSG00000040152 Thbs1 Thrombospondin-1 precursor (OMCL_OG2_72270); ENSMUSG00000031849 Comp Cartilage oligomeric matrix protein precursor (OMCL_OG2_72270)	CG7129	l(3)05822	PAIN	FBgn0010877	l(3)05822 lethal (3) 05822	-	ENSG00000109686 NP_0010095552 SH3 domain protein D19 (COMP); ENSG00000100365 NCF4 Neutrophil cytosol factor 4 (COMP)	-	ENSMUSG00000028082 Sh3d19 SH3 domain protein D19 (COMP); ENSMUSG00000071715 Ncf4 Neutrophil cytosol factor 4 (COMP)
CG11326	Tsp	BP	FBgn0031850	Tsp Thrombospondin cell adhesion,cell adhesion mediated by integrin,muscle development	ENSG00000105664 COMP Cartilage oligomeric matrix protein precursor (I, HOMG_74)	ENSG00000169231 THBS3 Thrombospondin-3 precursor (OMCL_OG2_72270, I); ENSG00000113296 THBS4 Thrombospondin-4 precursor (OMCL_OG2_72270, I); ENSG00000186340 THBS2 Thrombospondin-2 precursor (OMCL_OG2_72270); ENSG00000137801 THBS1 Thrombospondin-1 precursor (OMCL_OG2_72270); ENSG00000105664 COMP Cartilage oligomeric matrix protein precursor (OMCL_OG2_72270)	ENSMUSG00000031849 Comp Cartilage oligomeric matrix protein precursor (I, HOMG_74)	ENSMUSG00000028047 Thbs3 Thrombospondin-3 precursor (OMCL_OG2_72270, I); ENSMUSG00000021702 Thbs4 Thrombospondin-4 precursor (OMCL_OG2_72270, I); ENSMUSG00000023885 Thbs2 Thrombospondin-2 precursor (OMCL_OG2_72270); ENSMUSG00000040152 Thbs1 Thrombospondin-1 precursor (OMCL_OG2_72270); ENSMUSG00000031849 Comp Cartilage oligomeric matrix protein precursor (OMCL_OG2_72270)	CG4863	RpL3	PAIN	FBgn0020910	RpL3 Ribosomal protein L3 mitotic spindle organization and biogenesis,translation,mitotic spindle elongation	ENSG00000100316 RPL3 60S ribosomal protein L3 (I, HOMG_747)	ENSG00000140986 RPL3L 60S ribosomal protein L3-like (OMCL_OG2_71114, I, COMP); ENSG00000100316 RPL3 60S ribosomal protein L3 (OMCL_OG2_71114, COMP)	MGI:3644217 EG668219 predicted gene, EG668219 (I); ENSMUSG00000060036 Rpl3 60S ribosomal protein L3 (I)	ENSMUSG00000068262 \N \N (OMCL_OG2_71114, I, COMP); ENSMUSG00000060036 Rpl3 60S ribosomal protein L3 (OMCL_OG2_71114, COMP, HOMG_747); MGI:3647624 EG545864 predicted gene, EG545864 (I); 100043000 LOC100043000 (HOMG_747); ENSMUSG00000060264 \N \N (OMCL_OG2_71114); ENSMUSG00000002500 Rpl3l ribosomal protein L3-like (COMP); ENSMUSG00000057111 (OMCL_OG2_71114)
CG11327	CG11327	BP	FBgn0031849	CG11327 CG11327	-	-	-	-	CG6375	pit	PAIN	FBgn0025140	pit pitchoune	ENSG00000088205 DDX18 ATP-dependent RNA helicase DDX18 (OMCL_OG2_72284, COMP, I, HOMG_6697)	-	ENSMUSG00000001674 Ddx18 ATP-dependent RNA helicase DDX18 (OMCL_OG2_72284, COMP, I, HOMG_6697)	-
CG11327	CG11327	BP	FBgn0031849	CG11327 CG11327	-	-	-	-	CG12079	CG12079	PAIN	FBgn0035404	CG12079 CG12079 mitochondrial electron transport, NADH to ubiquinone	ENSG00000110536 PTPMT1 Protein-tyrosine phosphatase mitochondrial 1, mitochondrial precursor (HOMG_3346, I, OMCL_OG2_73200); ENSG00000213619 NDUFS3 NADH dehydrogenase iron-sulfur protein 3, mitochondrial precursor (COMP)	-	ENSMUSG00000005510 Ndufs3 NADH dehydrogenase iron-sulfur protein 3, mitochondrial precursor (COMP, I)	ENSMUSG00000005510 Ndufs3 NADH dehydrogenase iron-sulfur protein 3, mitochondrial precursor (HOMG_3346, OMCL_OG2_73200); ENSMUSG00000046153 \N \N (OMCL_OG2_73200); 624814 LOC624814 (HOMG_3346)
CG11377	CG11377	BP	FBgn0031217	CG11377 CG11377	ENSG00000184164 CRELD2 Cysteine-rich with EGF-like domain protein 2 precursor (HOMG_11526); ENSG00000163703 CRELD1 Cysteine-rich with EGF-like domain protein 1 precursor (I)	ENSG00000184164 CRELD2 Cysteine-rich with EGF-like domain protein 2 precursor (I, COMP, OMCL_OG2_76372); ENSG00000163703 CRELD1 Cysteine-rich with EGF-like domain protein 1 precursor (COMP, OMCL_OG2_76372)	ENSMUSG00000030284 Creld1 Cysteine-rich with EGF-like domain protein 1 precursor (I); ENSMUSG00000023272 Creld2 Cysteine-rich with EGF-like domain protein 2 precursor (HOMG_11526)	ENSMUSG00000023272 Creld2 Cysteine-rich with EGF-like domain protein 2 precursor (I, COMP, OMCL_OG2_76372); ENSMUSG00000030284 Creld1 Cysteine-rich with EGF-like domain protein 1 precursor (COMP, OMCL_OG2_76372)	CG11893	CG11893	PAIN	FBgn0039316	CG11893 CG11893	-	-	-	-
CG11380	CG11380	BP	FBgn0040359	CG11380 CG11380	-	-	-	-	CG32016	CG32016	PAIN	FBgn0052016	CG32016 CG32016	ENSG00000184708 EIF4ENIF1 Eukaryotic translation initiation factor 4E transporter (OMCL_OG2_82543, COMP)	-	ENSMUSG00000020454 Eif4enif1 Eukaryotic translation initiation factor 4E transporter (OMCL_OG2_82543, COMP, I)	-
CG11380	CG11380	BP	FBgn0040359	CG11380 CG11380	-	-	-	-	CG7187	Ssdp	PAIN	FBgn0011481	Ssdp Sequence-specific single-stranded DNA-binding protein regulation of transcription	ENSG00000157216 SSBP3 Single-stranded DNA-binding protein 3 (I, HOMG_23411)	ENSG00000145687 SSBP2 Single-stranded DNA-binding protein 2 (OMCL_OG2_75367, I); ENSG00000157216 SSBP3 Single-stranded DNA-binding protein 3 (OMCL_OG2_75367); ENSG00000130511 SSBP4 Single-stranded DNA-binding protein 4 (I)	ENSMUSG00000061887 Ssbp3 Single-stranded DNA-binding protein 3 (I, HOMG_23411)	ENSMUSG00000003992 Ssbp2 Single-stranded DNA-binding protein 2 (OMCL_OG2_75367, I); ENSMUSG00000070003 Ssbp4 single stranded DNA binding protein 4 (I); ENSMUSG00000061887 Ssbp3 Single-stranded DNA-binding protein 3 (OMCL_OG2_75367); MGI:1914220 Ssbp2 single-stranded DNA binding protein 2 (I)
CG11419	CG11419	PAIN	FBgn0034231	CG11419 CG11419 mitotic anaphase,regulation of mitotic metaphase/anaphase transition	ENSG00000164162 ANAPC10 Anaphase-promoting complex subunit 10 (HOMG_32238, COMP, I, OMCL_OG2_72872)	-	ENSMUSG00000036977 Anapc10 Anaphase-promoting complex subunit 10 (HOMG_32238, COMP, I, OMCL_OG2_72872)	-	CG7001	Pk17E	BP	FBgn0004462	Pk17E Protein kinase-like 17E protein amino acid phosphorylation	ENSG00000167524 SG494_HUMAN Uncharacterized serine/threonine-protein kinase SgK494 (COMP)	-	ENSMUSG00000037593 BC030499 Uncharacterized serine/threonine-protein kinase SgK494 (COMP)	-
CG11419	CG11419	PAIN	FBgn0034231	CG11419 CG11419 mitotic anaphase,regulation of mitotic metaphase/anaphase transition	ENSG00000164162 ANAPC10 Anaphase-promoting complex subunit 10 (HOMG_32238, COMP, I, OMCL_OG2_72872)	-	ENSMUSG00000036977 Anapc10 Anaphase-promoting complex subunit 10 (HOMG_32238, COMP, I, OMCL_OG2_72872)	-	CG13090	CG13090	BP	FBgn0032054	CG13090 CG13090 Mo-molybdopterin cofactor biosynthetic process	ENSG00000124217 MOCS3 Molybdenum cofactor synthesis protein 3 (HOMG_6108, COMP, I, OMCL_OG2_71038)	-	ENSMUSG00000074576 Mocs3 Molybdenum cofactor synthesis protein 3 (HOMG_6108, COMP, I, OMCL_OG2_71038)	-
CG1152	Gld	PAIN	FBgn0001112	Gld Glucose dehydrogenase sperm storage,pupal chitin-based cuticle development,alcohol metabolic process,glucose metabolic process,cuticle development	-	ENSG00000016391 CHDH Choline dehydrogenase, mitochondrial precursor (OMCL_OG2_70827, I, COMP)	-	ENSMUSG00000015970 Chdh Choline dehydrogenase, mitochondrial precursor (OMCL_OG2_70827, I, COMP)	CG32491	mod(mdg4)	BP	FBgn0002781	mod(mdg4) modifier of mdg4 regulation of chromatin assembly or disassembly,establishment and/or maintenance of chromatin architecture,regulation of apoptosis,induction of apoptosis,germ cell migration,male meiosis I,male meiosis chromosome segregation,nuclear organization and biogenesis,oogenesis	-	ENSG00000181722 ZBTB20 Zinc finger and BTB domain-containing protein 20 (COMP); ENSG00000119574 ZBTB45 Zinc finger and BTB domain-containing protein 45 (COMP)	-	ENSMUSG00000022708 Zbtb20 zinc finger and BTB domain containing 20 (COMP); ENSMUSG00000049600 Zbtb45 zinc finger and BTB domain containing 45 (COMP)
CG11546	kermit	BP	FBgn0010504	kermit kermit regulation of G-protein coupled receptor protein signaling pathway	ENSG00000179855 GIPC3 PDZ domain-containing protein GIPC3 (HOMG_77068); ENSG00000123159 GIPC1 PDZ domain-containing protein GIPC1 (I)	ENSG00000179855 GIPC3 PDZ domain-containing protein GIPC3 (OMCL_OG2_75156, I, COMP); ENSG00000137960 GIPC2 PDZ domain-containing protein GIPC2 (OMCL_OG2_75156, I, COMP); ENSG00000123159 GIPC1 PDZ domain-containing protein GIPC1 (OMCL_OG2_75156, COMP)	ENSMUSG00000019433 Gipc1 PDZ domain-containing protein GIPC1 (I); ENSMUSG00000034872 Gipc3 PDZ domain-containing protein GIPC3 (HOMG_77068)	ENSMUSG00000034872 Gipc3 PDZ domain-containing protein GIPC3 (OMCL_OG2_75156, I, COMP); ENSMUSG00000039131 Gipc2 PDZ domain-containing protein GIPC2 (OMCL_OG2_75156, I, COMP); ENSMUSG00000019433 Gipc1 PDZ domain-containing protein GIPC1 (OMCL_OG2_75156, COMP)	CG5507	T48	PAIN	FBgn0004359	T48 Transcript 48 ventral furrow formation	-	-	-	-
CG11581	CG11581	BP	FBgn0030540	CG11581 CG11581	-	-	-	-	CG13047	CG13047	PAIN	FBgn0036594	CG13047 CG13047	-	-	-	-
CG11581	CG11581	BP	FBgn0030540	CG11581 CG11581	-	-	-	-	CG5711	Arr1	PAIN	FBgn0000120	Arr1 Arrestin 1 phototransduction,photoreceptor cell maintenance,endocytosis,metarhodopsin inactivation,deactivation of rhodopsin mediated signaling	-	ENSG00000130561 SAG S-arrestin (COMP); ENSG00000137486 ARRB1 Beta-arrestin-1 (COMP); ENSG00000141480 ARRB2 Beta-arrestin-2 (COMP); ENSG00000120500 ARR3 Arrestin-C (COMP)	-	ENSMUSG00000056055 Sag S-arrestin (COMP); ENSMUSG00000060890 Arr3 Arrestin-C (COMP); ENSMUSG00000060216 Arrb2 Beta-arrestin-2 (COMP); ENSMUSG00000018909 Arrb1 Beta-arrestin-1 (COMP)
CG11607	H2.0	BP	FBgn0001170	H2.0 Homeodomain protein 2.0 regulation of transcription, DNA-dependent	ENSG00000136630 HLX Homeobox protein HLX1 (I, OMCL_OG2_84016)	-	ENSMUSG00000039377 Hlx H20-like homeobox protein (I, OMCL_OG2_84016)	-	CG3181	Ts	PAIN	FBgn0024920	Ts Ts deoxyribonucleotide biosynthetic process,dTMP biosynthetic process	ENSG00000176890 TYMS Thymidylate synthase (COMP, I, HOMG_834, OMCL_OG2_71350)	-	ENSMUSG00000025747 Tyms Thymidylate synthase (COMP, I, HOMG_834, OMCL_OG2_71350)	-
CG11607	H2.0	BP	FBgn0001170	H2.0 Homeodomain protein 2.0 regulation of transcription, DNA-dependent	ENSG00000136630 HLX Homeobox protein HLX1 (I, OMCL_OG2_84016)	-	ENSMUSG00000039377 Hlx H20-like homeobox protein (I, OMCL_OG2_84016)	-	CG4550	ninaE	PAIN	FBgn0002940	ninaE neither inactivation nor afterpotential E phototransduction,G-protein coupled receptor protein signaling pathway,rhabdomere development,negative regulation of compound eye retinal cell programmed cell death,response to light intensity,adult locomotory behavior,photoreceptor cell morphogenesis	-	ENSG00000122375 OPN4 Melanopsin (OMCL_OG2_75321, I, COMP)	-	ENSMUSG00000021799 Opn4 Melanopsin (OMCL_OG2_75321, I, COMP)
CG1168	7B2	BP	FBgn0041707	7B2 7B2 neuropeptide signaling pathway,peptide hormone processing	ENSG00000166922 SCG5 Neuroendocrine protein 7B2 precursor (OMCL_OG2_78229, COMP)	-	ENSMUSG00000023236 Scg5 Neuroendocrine protein 7B2 precursor (OMCL_OG2_78229, COMP, I)	-	CG2371	CG2371	PAIN	FBgn0030323	CG2371 CG2371	ENSG00000145781 COMMD10 COMM domain-containing protein 10 (OMCL_OG2_80120, COMP, I)	-	ENSMUSG00000042705 Commd10 COMM domain-containing protein 10 (OMCL_OG2_80120, COMP, I)	-
CG11699	CG11699	BP	FBgn0030311	CG11699 CG11699	ENSG00000122339 C6orf35 CDNA FLJ10029 fis, clone HEMBA1000817 (OMCL_OG2_80541, I)	ENSG00000122339 C6orf35 CDNA FLJ10029 fis, clone HEMBA1000817 (HOMG_44020, COMP); ENSG00000215712 NP_0609222 CDNA FLJ10029 fis, clone HEMBA1000817 (COMP); 730074 LOC730074 (HOMG_44020)	ENSMUSG00000004945 5730437N04Rik UPF0463 protein C6orf35 homolog (OMCL_OG2_80541, HOMG_44020, COMP, I)	-	CG10033	Dmel_CG10033	PAIN	FBgn0000721	for foraging larval locomotory behavior,protein amino acid phosphorylation,regulation of heart contraction,larval feeding behavior,feeding behavior	ENSG00000185532 PRKG1 cGMP-dependent protein kinase 1, beta isozyme (COMP, I)	ENSG00000185532 PRKG1 cGMP-dependent protein kinase 1, beta isozyme (OMCL_OG2_71230); ENSG00000138669 PRKG2 cGMP-dependent protein kinase 2 (OMCL_OG2_71230)	ENSMUSG00000052920 Prkg1 cGMP-dependent protein kinase 1, alpha isozyme (COMP, I)	ENSMUSG00000052920 Prkg1 cGMP-dependent protein kinase 1, alpha isozyme (OMCL_OG2_71230); ENSMUSG00000029334 Prkg2 cGMP-dependent protein kinase 2 (OMCL_OG2_71230)
CG11761	trsn	BP	FBgn0033528	trsn translin	ENSG00000211460 TSN Translin (COMP, I, HOMG_3397, OMCL_OG2_75059)	-	ENSMUSG00000026374 Tsn Translin (COMP, I, HOMG_3397, OMCL_OG2_75059)	-	CG5012	mRpL12	PAIN	FBgn0011787	mRpL12 mitochondrial ribosomal protein L12 cell growth,translation,mitochondrion organization and biogenesis	ENSG00000183093 MRPL12 39S ribosomal protein L12, mitochondrial precursor (COMP, I, HOMG_2212, OMCL_OG2_70929)	-	ENSMUSG00000039640 Mrpl12 39S ribosomal protein L12, mitochondrial precursor (COMP, I, HOMG_2212, OMCL_OG2_70929)	-
CG11761	trsn	BP	FBgn0033528	trsn translin	ENSG00000211460 TSN Translin (COMP, I, HOMG_3397, OMCL_OG2_75059)	-	ENSMUSG00000026374 Tsn Translin (COMP, I, HOMG_3397, OMCL_OG2_75059)	-	CG11820	CG11820	PAIN	FBgn0039270	CG11820 CG11820	ENSG00000102103 PQBP1 Polyglutamine-binding protein 1 (COMP, I, OMCL_OG2_76839)	-	ENSMUSG00000031157 Pqbp1 Polyglutamine-binding protein 1 (COMP, I, OMCL_OG2_76839)	-
CG11802	CG11802	BP	FBgn0030346	CG11802 CG11802	ENSG00000165714 LOH12CR1 LOH1CR12 (OMCL_OG2_79854, COMP, I, HOMG_12188)	-	ENSMUSG00000042992 Loh12cr1 loss of heterozygosity, 12, chromosomal region 1 homolog (OMCL_OG2_79854, COMP, I, HOMG_12188)	-	CG3224	CG3224	PAIN	FBgn0029885	CG3224 CG3224	ENSG00000142684 ZNF593 Zinc finger protein 593 (HOMG_41070, COMP, I, OMCL_OG2_73261)	-	ENSMUSG00000028840 Zfp593 Zinc finger protein 593 (HOMG_41070, COMP, I, OMCL_OG2_73261)	-
CG11802	CG11802	BP	FBgn0030346	CG11802 CG11802	ENSG00000165714 LOH12CR1 LOH1CR12 (OMCL_OG2_79854, COMP, I, HOMG_12188)	-	ENSMUSG00000042992 Loh12cr1 loss of heterozygosity, 12, chromosomal region 1 homolog (OMCL_OG2_79854, COMP, I, HOMG_12188)	-	CG7015	Unr	PAIN	FBgn0035895	Unr Upstream of N-ras dosage compensation, by hyperactivation of X chromosome,negative regulation of translation,regulation of transcription, DNA-dependent	ENSG00000009307 CSDE1 Cold shock domain-containing protein E1 (OMCL_OG2_77988, COMP, I); 7812 CSDE1 (HOMG_5179)	-	ENSMUSG00000068823 Csde1 Cold shock domain-containing protein E1 (COMP, I, HOMG_5179)	ENSMUSG00000072420 (OMCL_OG2_77988); ENSMUSG00000068823 Csde1 Cold shock domain-containing protein E1 (OMCL_OG2_77988); ENSMUSG00000047588 (OMCL_OG2_77988)
CG11885	CG11885	BP	FBgn0031253	CG11885 CG11885	-	-	-	-	CG13319	CG13319	PAIN	FBgn0033781	CG13319 CG13319	ENSG00000180822 Q5JS54_HUMAN \N (OMCL_OG2_80668)	-	ENSMUSG00000071451 NP_0010949001 RIKEN cDNA 2310047M15 gene , transcript variant 2, mRNA (OMCL_OG2_80668)	-
CG11885	CG11885	BP	FBgn0031253	CG11885 CG11885	-	-	-	-	CG8107	CalpB	PAIN	FBgn0025866	CalpB Calpain-B proteolysis,protein autoprocessing	ENSG00000135773 CAPN9 Calpain-9 (HOMG_38208)	ENSG00000014216 CAPN1 Calpain-1 catalytic subunit (OMCL_OG2_70983, COMP, I); ENSG00000162909 CAPN2 Calpain-2 catalytic subunit precursor (OMCL_OG2_70983, COMP, I); ENSG00000135773 CAPN9 Calpain-9 (OMCL_OG2_70983, COMP, I); ENSG00000137225 CAPN11 Calpain-11 (OMCL_OG2_70983, COMP); ENSG00000203697 CAPN8 Calpain 8 (OMCL_OG2_70983, COMP); ENSG00000182472 CAPN12 Calpain-12 (COMP); ENSG00000162949 CAPN…	ENSMUSG00000031981 Capn9 Calpain-9 (I, HOMG_38208)	ENSMUSG00000038599 Capn8 calpain 8 (OMCL_OG2_70983, COMP, I); ENSMUSG00000031981 Capn9 Calpain-9 (OMCL_OG2_70983, COMP, I); ENSMUSG00000024942 Capn1 Calpain-1 catalytic subunit (OMCL_OG2_70983, COMP, I); ENSMUSG00000026509 Capn2 Calpain-2 catalytic subunit precursor (OMCL_OG2_70983, COMP, I); ENSMUSG00000079110 Capn3 Calpain-3 (COMP, I); ENSMUSG00000058626 Capn11 calpain 11 (OMCL_OG2_70983, COMP)…
CG11893	CG11893	PAIN	FBgn0039316	CG11893 CG11893	-	-	-	-	CG6046	Bin1	BP	FBgn0024491	Bin1 Bicoid interacting protein 1 negative regulation of transcription from RNA polymerase II promoter,negative regulation of transcription, DNA-dependent	ENSG00000150459 SAP18 Histone deacetylase complex subunit SAP18 (HOMG_4289, COMP, I)	ENSG00000150459 SAP18 Histone deacetylase complex subunit SAP18 (OMCL_OG2_74232)	ENSMUSG00000061104 Sap18 Histone deacetylase complex subunit SAP18 (I); ENSMUSG00000021963 Sap18 Histone deacetylase complex subunit SAP18 (I); MGI:1277978 Sap18 Sin3-associated polypeptide 18 (I)	ENSMUSG00000021963 Sap18 Histone deacetylase complex subunit SAP18 (OMCL_OG2_74232, HOMG_4289, COMP); ENSMUSG00000061104 Sap18 Histone deacetylase complex subunit SAP18 (OMCL_OG2_74232, COMP); 100041953 LOC100041953 (HOMG_4289)
CG11901	Ef1gamma	BP	FBgn0029176	Ef1gamma Ef1Î³ translational elongation,autophagic cell death,salivary gland cell autophagic cell death	ENSG00000186676 EEF1G Elongation factor 1-gamma (OMCL_OG2_71700, COMP, I); 1937 EEF1G (HOMG_20363)	-	ENSMUSG00000071644 Eef1g Elongation factor 1-gamma (HOMG_20363, COMP, I)	ENSMUSG00000043754 (OMCL_OG2_71700); ENSMUSG00000048122 (OMCL_OG2_71700); ENSMUSG00000071644 Eef1g Elongation factor 1-gamma (OMCL_OG2_71700); MGI:3646042 EG433283 predicted gene, EG433283 (I)	CG18350	Sxl	PAIN	FBgn0003659	Sxl Sex lethal female germ-line sex determination,germ cell development,regulation of nuclear mRNA splicing, via spliceosome,female sex differentiation,smoothened signaling pathway,sex determination, primary response to X:A ratio,female sex determination,alternative nuclear mRNA splicing, via spliceosome,negative regulation of nuclear mRNA splicing, via spliceosome,somatic sex determination,dosag…	-	-	-	-
CG11901	Ef1gamma	BP	FBgn0029176	Ef1gamma Ef1Î³ translational elongation,autophagic cell death,salivary gland cell autophagic cell death	ENSG00000186676 EEF1G Elongation factor 1-gamma (OMCL_OG2_71700, COMP, I); 1937 EEF1G (HOMG_20363)	-	ENSMUSG00000071644 Eef1g Elongation factor 1-gamma (HOMG_20363, COMP, I)	ENSMUSG00000043754 (OMCL_OG2_71700); ENSMUSG00000048122 (OMCL_OG2_71700); ENSMUSG00000071644 Eef1g Elongation factor 1-gamma (OMCL_OG2_71700); MGI:3646042 EG433283 predicted gene, EG433283 (I)	CG11183	Dcp1	PAIN	FBgn0034921	Dcp1 Decapping protein 1 mRNA catabolic process, nonsense-mediated decay,gene silencing by miRNA,tRNA aminoacylation for protein translation	55802 DCP1A (HOMG_10178); ENSG00000151065 DCP1B mRNA-decapping enzyme 1B (I)	ENSG00000162290 DCP1A mRNA-decapping enzyme 1A (OMCL_OG2_72695, I, COMP); ENSG00000151065 DCP1B mRNA-decapping enzyme 1B (OMCL_OG2_72695, COMP)	ENSMUSG00000021962 Dcp1a mRNA-decapping enzyme 1A (I, HOMG_10178); ENSMUSG00000041477 Dcp1b mRNA-decapping enzyme 1B (I)	ENSMUSG00000041477 Dcp1b mRNA-decapping enzyme 1B (OMCL_OG2_72695, I, COMP); ENSMUSG00000021962 Dcp1a mRNA-decapping enzyme 1A (OMCL_OG2_72695, COMP)
CG11905	CG11905	BP	FBgn0036678	CG11905 CG11905	-	-	-	-	CG3613	qkr58E-1	PAIN	FBgn0022986	qkr58E-1 quaking related 58E-1	ENSG00000112232 KHDRBS2 KH domain-containing, RNA-binding, signal transduction-associated protein 2 (HOMG_15772)	ENSG00000131773 KHDRBS3 KH domain-containing, RNA-binding, signal transduction-associated protein 3 (OMCL_OG2_77122, COMP, I); ENSG00000112232 KHDRBS2 KH domain-containing, RNA-binding, signal transduction-associated protein 2 (OMCL_OG2_77122, COMP, I); ENSG00000121774 KHDRBS1 KH domain-containing, RNA-binding, signal transduction-associated protein 1 (COMP, I)	ENSMUSG00000026058 Khdrbs2 KH domain-containing, RNA-binding, signal transduction-associated protein 2 (HOMG_15772)	ENSMUSG00000026058 Khdrbs2 KH domain-containing, RNA-binding, signal transduction-associated protein 2 (OMCL_OG2_77122, COMP, I); ENSMUSG00000022332 Khdrbs3 KH domain-containing, RNA-binding, signal transduction-associated protein 3 (OMCL_OG2_77122, COMP, I); ENSMUSG00000028790 Khdrbs1 KH domain-containing, RNA-binding, signal transduction-associated protein 1 (COMP, I)
CG11905	CG11905	BP	FBgn0036678	CG11905 CG11905	-	-	-	-	CG4887	CG4887	PAIN	FBgn0031318	CG4887 CG4887	ENSG00000182872 RBM10 RNA-binding protein 10 (I, HOMG_31330); ENSG00000003756 RBM5 RNA-binding protein 5 (I)	ENSG00000003756 RBM5 RNA-binding protein 5 (COMP, OMCL_OG2_73880); ENSG00000182872 RBM10 RNA-binding protein 10 (COMP, OMCL_OG2_73880); ENSG00000004534 RBM6 RNA-binding protein 6 (COMP)	ENSMUSG00000031060 Rbm10 RNA binding motif protein 10 (I, HOMG_31330); ENSMUSG00000032580 Rbm5 RNA-binding protein 5 (I)	ENSMUSG00000032580 Rbm5 RNA-binding protein 5 (COMP, OMCL_OG2_73880); ENSMUSG00000031060 Rbm10 RNA binding motif protein 10 (COMP, OMCL_OG2_73880); ENSMUSG00000042188 \N \N (OMCL_OG2_73880); ENSMUSG00000032582 Rbm6 RNA binding motif protein 6 isoform b (COMP)
CG12045	Cpr100A	BP	FBgn0039805	Cpr100A Cuticular protein 100A	-	-	-	-	CG18372	AttB	PAIN	FBgn0041581	AttB Attacin-B antibacterial humoral response,defense response to bacterium,defense response	-	-	-	-
CG12052	lola	BP	FBgn0005630	lola longitudinals lacking axon midline choice point recognition,positive regulation of transcription, DNA-dependent,axonogenesis,ciliary or flagellar motility,antimicrobial humoral response,regulation of transcription from RNA polymerase II promoter,axon guidance	-	-	-	-	CG13777	milt	PAIN	FBgn0022201	milt milton Nebenkern formation,axon transport of mitochondrion,mitochondrion distribution,sperm mitochondrion organization and biogenesis	ENSG00000182606 TRAK1 Trafficking kinesin-binding protein 1 (HOMG_25103, I)	ENSG00000115993 TRAK2 Trafficking kinesin-binding protein 2 (I, OMCL_OG2_75008); ENSG00000182606 TRAK1 Trafficking kinesin-binding protein 1 (OMCL_OG2_75008)	ENSMUSG00000032536 Trak1 trafficking protein, kinesin binding 1 (HOMG_25103, I); ENSMUSG00000026028 Trak2 trafficking protein, kinesin binding 2 (I)	ENSMUSG00000026028 Trak2 trafficking protein, kinesin binding 2 (I, OMCL_OG2_75008); ENSMUSG00000032536 Trak1 trafficking protein, kinesin binding 1 (I, OMCL_OG2_75008)
CG12052	lola	BP	FBgn0005630	lola longitudinals lacking axon midline choice point recognition,positive regulation of transcription, DNA-dependent,axonogenesis,ciliary or flagellar motility,antimicrobial humoral response,regulation of transcription from RNA polymerase II promoter,axon guidance	-	-	-	-	CG10033	Dmel_CG10033	PAIN	FBgn0000721	for foraging larval locomotory behavior,protein amino acid phosphorylation,regulation of heart contraction,larval feeding behavior,feeding behavior	ENSG00000185532 PRKG1 cGMP-dependent protein kinase 1, beta isozyme (COMP, I)	ENSG00000185532 PRKG1 cGMP-dependent protein kinase 1, beta isozyme (OMCL_OG2_71230); ENSG00000138669 PRKG2 cGMP-dependent protein kinase 2 (OMCL_OG2_71230)	ENSMUSG00000052920 Prkg1 cGMP-dependent protein kinase 1, alpha isozyme (COMP, I)	ENSMUSG00000052920 Prkg1 cGMP-dependent protein kinase 1, alpha isozyme (OMCL_OG2_71230); ENSMUSG00000029334 Prkg2 cGMP-dependent protein kinase 2 (OMCL_OG2_71230)
CG12052	lola	BP	FBgn0005630	lola longitudinals lacking axon midline choice point recognition,positive regulation of transcription, DNA-dependent,axonogenesis,ciliary or flagellar motility,antimicrobial humoral response,regulation of transcription from RNA polymerase II promoter,axon guidance	-	-	-	-	CG5134	MED9	PAIN	FBgn0034311	MED9 Mediator complex subunit 9	ENSG00000141026 MED9 mediator complex subunit 9 (COMP)	-	ENSMUSG00000061650 Med9 Mediator of RNA polymerase II transcription subunit 9 (COMP)	-
CG12079	CG12079	PAIN	FBgn0035404	CG12079 CG12079 mitochondrial electron transport, NADH to ubiquinone	ENSG00000110536 PTPMT1 Protein-tyrosine phosphatase mitochondrial 1, mitochondrial precursor (HOMG_3346, I, OMCL_OG2_73200); ENSG00000213619 NDUFS3 NADH dehydrogenase iron-sulfur protein 3, mitochondrial precursor (COMP)	-	ENSMUSG00000005510 Ndufs3 NADH dehydrogenase iron-sulfur protein 3, mitochondrial precursor (COMP, I)	ENSMUSG00000005510 Ndufs3 NADH dehydrogenase iron-sulfur protein 3, mitochondrial precursor (HOMG_3346, OMCL_OG2_73200); ENSMUSG00000046153 \N \N (OMCL_OG2_73200); 624814 LOC624814 (HOMG_3346)	CG11265	CG11265	BP	FBgn0030049	CG11265 CG11265 sister chromatid cohesion	ENSG00000112941 POLS DNA polymerase sigma (HOMG_5089); ENSG00000121274 PAPD5 PAP associated domain containing 5 isoform a (I)	ENSG00000112941 POLS DNA polymerase sigma (OMCL_OG2_71489, I, COMP); ENSG00000121274 PAPD5 PAP associated domain containing 5 isoform a (OMCL_OG2_71489, COMP)	ENSMUSG00000036779 Papd5 PAP-associated domain-containing protein 5 (I); ENSMUSG00000034575 Pols DNA polymerase sigma (HOMG_5089)	ENSMUSG00000034575 Pols DNA polymerase sigma (OMCL_OG2_71489, I, COMP); ENSMUSG00000036779 Papd5 PAP-associated domain-containing protein 5 (OMCL_OG2_71489, COMP)
CG12131	Adam	PAIN	FBgn0027619	Adam Adam translational initiation	ENSG00000104131 EIF3J Eukaryotic translation initiation factor 3 subunit 1 (HOMG_37845, OMCL_OG2_74149, COMP, I)	-	ENSMUSG00000043424 Eif3j predicted gene, ENSMUSG00000043424 (OMCL_OG2_74149, I); ENSMUSG00000027236 Eif3j predicted gene, ENSMUSG00000043424 (I); MGI:1925905 Eif3j eukaryotic translation initiation factor 3, subunit J (I)	ENSMUSG00000027236 Eif3j predicted gene, ENSMUSG00000043424 (HOMG_37845, COMP); ENSMUSG00000043424 Eif3j predicted gene, ENSMUSG00000043424 (COMP); 100042807 LOC100042807 (HOMG_37845)	CG7285	star1	BP	FBgn0036790	star1 allatostatin C receptor 1 G-protein coupled receptor protein signaling pathway	ENSG00000132671 SSTR4 Somatostatin receptor type 4 (HOMG_20286)	ENSG00000180616 SSTR2 Somatostatin receptor type 2 (COMP, I, OMCL_OG2_75535); ENSG00000132671 SSTR4 Somatostatin receptor type 4 (COMP, I); ENSG00000139874 SSTR1 Somatostatin receptor type 1 (COMP, I); ENSG00000183473 SSTR3 Somatostatin receptor type 3 (COMP, I); ENSG00000162009 SSTR5 Somatostatin receptor type 5 (COMP, I); ENSG00000125510 OPRL1 Nociceptin receptor (COMP); ENSG00000125522 NPBWR2 …	ENSMUSG00000037014 Sstr4 Somatostatin receptor type 4 (HOMG_20286)	ENSMUSG00000047904 Sstr2 Somatostatin receptor type 2 (COMP, I, OMCL_OG2_75535); ENSMUSG00000044933 Sstr3 Somatostatin receptor type 3 (COMP, I); ENSMUSG00000050824 Sstr5 Somatostatin receptor type 5 (COMP, I); ENSMUSG00000037014 Sstr4 Somatostatin receptor type 4 (COMP, I); ENSMUSG00000035431 Sstr1 Somatostatin receptor type 1 (COMP, I); ENSMUSG00000027584 Oprl1 Nociceptin receptor (COMP); ENSMU…
CG1216	mri	BP	FBgn0035107	mri mrityu potassium ion transport,autophagic cell death,salivary gland cell autophagic cell death	ENSG00000148925 BTBD10 BTB/POZ domain-containing protein 10 (HOMG_13009, I, OMCL_OG2_77823)	ENSG00000112078 KCTD20 BTB/POZ domain-containing protein KCTD20 (I, COMP); ENSG00000148925 BTBD10 BTB/POZ domain-containing protein 10 (COMP)	ENSMUSG00000038187 Btbd10 BTB/POZ domain-containing protein 10 (HOMG_13009, I, OMCL_OG2_77823)	ENSMUSG00000005936 Kctd20 BTB/POZ domain-containing protein KCTD20 (I, COMP); ENSMUSG00000038187 Btbd10 BTB/POZ domain-containing protein 10 (COMP)	CG6637	CG6637	PAIN	FBgn0038908	CG6637 CG6637	ENSG00000159210 SNF8 Vacuolar sorting protein SNF8 (OMCL_OG2_73046, COMP, I, HOMG_5239)	-	ENSMUSG00000006058 Snf8 Vacuolar-sorting protein SNF8 (OMCL_OG2_73046, COMP, I, HOMG_5239)	-
CG1216	mri	BP	FBgn0035107	mri mrityu potassium ion transport,autophagic cell death,salivary gland cell autophagic cell death	ENSG00000148925 BTBD10 BTB/POZ domain-containing protein 10 (HOMG_13009, I, OMCL_OG2_77823)	ENSG00000112078 KCTD20 BTB/POZ domain-containing protein KCTD20 (I, COMP); ENSG00000148925 BTBD10 BTB/POZ domain-containing protein 10 (COMP)	ENSMUSG00000038187 Btbd10 BTB/POZ domain-containing protein 10 (HOMG_13009, I, OMCL_OG2_77823)	ENSMUSG00000005936 Kctd20 BTB/POZ domain-containing protein KCTD20 (I, COMP); ENSMUSG00000038187 Btbd10 BTB/POZ domain-containing protein 10 (COMP)	CG6948	Clc	PAIN	FBgn0024814	Clc Clathrin light chain intracellular protein transport,neurotransmitter transport,protein complex assembly,synaptic vesicle coating,neurotransmitter secretion	ENSG00000175416 CLTB Clathrin light chain B (OMCL_OG2_74680, I); ENSG00000122705 CLTA Clathrin light chain A (HOMG_1384)	ENSG00000122705 CLTA Clathrin light chain A (I, COMP); ENSG00000175416 CLTB Clathrin light chain B (COMP)	ENSMUSG00000047547 Cltb Clathrin light chain B (OMCL_OG2_74680, I); ENSMUSG00000028478 Clta Clathrin light chain A (HOMG_1384)	ENSMUSG00000028478 Clta Clathrin light chain A (I, COMP); ENSMUSG00000047547 Cltb Clathrin light chain B (COMP)
CG12235	Arp11	PAIN	FBgn0031050	Arp11 Arp11 cytoskeleton organization and biogenesis	ENSG00000131966 ACTR10 Actin-related protein 10 (OMCL_OG2_77536, HOMG_10220, COMP, I)	-	ENSMUSG00000021076 Actr10 Actin-related protein 10 (OMCL_OG2_77536, HOMG_10220, COMP, I)	-	CG2862	CG2862	BP	FBgn0031459	CG2862 CG2862	ENSG00000169567 HINT1 Histidine triad nucleotide-binding protein 1 (HOMG_3904, I)	ENSG00000169567 HINT1 Histidine triad nucleotide-binding protein 1 (OMCL_OG2_70881, COMP); ENSG00000137133 HINT2 Histidine triad nucleotide-binding protein 2 (OMCL_OG2_70881, COMP); ENSG00000173568 \N \N (I)	ENSMUSG00000020267 Hint1 Histidine triad nucleotide-binding protein 1 (HOMG_3904, I)	ENSMUSG00000028470 Hint2 Histidine triad nucleotide-binding protein 2 (OMCL_OG2_70881, COMP); ENSMUSG00000020267 Hint1 Histidine triad nucleotide-binding protein 1 (OMCL_OG2_70881, COMP)
CG12235	Arp11	PAIN	FBgn0031050	Arp11 Arp11 cytoskeleton organization and biogenesis	ENSG00000131966 ACTR10 Actin-related protein 10 (OMCL_OG2_77536, HOMG_10220, COMP, I)	-	ENSMUSG00000021076 Actr10 Actin-related protein 10 (OMCL_OG2_77536, HOMG_10220, COMP, I)	-	CG7001	Pk17E	BP	FBgn0004462	Pk17E Protein kinase-like 17E protein amino acid phosphorylation	ENSG00000167524 SG494_HUMAN Uncharacterized serine/threonine-protein kinase SgK494 (COMP)	-	ENSMUSG00000037593 BC030499 Uncharacterized serine/threonine-protein kinase SgK494 (COMP)	-
CG12306	polo	BP	FBgn0003124	polo polo pronuclear migration,negative regulation of neuroblast proliferation,phagocytosis, engulfment,sperm aster formation,spindle assembly involved in female meiosis II,female meiosis,mitotic spindle organization and biogenesis,male meiosis chromosome segregation,cytokinesis,male meiosis,pronuclear fusion,mitosis,protein amino acid phosphorylation,protein localization,cell cycle,female meiosi…	ENSG00000166851 PLK1 Serine/threonine-protein kinase PLK1 (COMP, I, HOMG_3690)	ENSG00000166851 PLK1 Serine/threonine-protein kinase PLK1 (OMCL_OG2_71994); ENSG00000145632 PLK2 Serine/threonine-protein kinase PLK2 (OMCL_OG2_71994); ENSG00000173846 PLK3 Serine/threonine-protein kinase PLK3 (OMCL_OG2_71994)	ENSMUSG00000030867 Plk1 Serine/threonine-protein kinase PLK1 (COMP, I, HOMG_3690)	ENSMUSG00000021701 Plk2 Serine/threonine-protein kinase PLK2 (OMCL_OG2_71994); ENSMUSG00000028680 Plk3 Serine/threonine-protein kinase PLK3 (OMCL_OG2_71994); ENSMUSG00000030867 Plk1 Serine/threonine-protein kinase PLK1 (OMCL_OG2_71994)	CG1966	Acf1	PAIN	FBgn0027620	Acf1 ATP-dependent chromatin assembly factor large subunit nucleosome positioning,chromatin assembly or disassembly,neuron development,dendrite morphogenesis,regulation of transcription, DNA-dependent,nucleosome mobilization,nucleosome assembly,muscle development,epidermis development	ENSG00000198604 BAZ1A Bromodomain adjacent to zinc finger domain protein 1A WCRF18 (HOMG_45654, I, OMCL_OG2_78483)	-	ENSMUSG00000035021 Baz1a Bromodomain adjacent to zinc finger domain protein 1A (HOMG_45654, I, OMCL_OG2_78483)	-
CG12363	Dlc90F	BP	FBgn0024432	Dlc90F Dynein light chain 90F spermatid development,microtubule-based movement	ENSG00000146425 DYNLT1 Dynein light chain Tctex-type 1 (COMP, I, HOMG_4754)	ENSG00000165169 DYNLT3 Dynein light chain Tctex-type 3 (OMCL_OG2_72724); ENSG00000146425 DYNLT1 Dynein light chain Tctex-type 1 (OMCL_OG2_72724)	ENSMUSG00000000579 Dynlt1 Dynein light chain Tctex-type 1 (I)	ENSMUSG00000000579 Dynlt1 Dynein light chain Tctex-type 1 (COMP, OMCL_OG2_72724, HOMG_4754); ENSMUSG00000079732 Q9DAS3_MOUSE Adult female placenta cDNA, RIKEN full-length enriched library, clone:1600032G08 product:t-complex testis expressed 1, full insert sequence (I, COMP); ENSMUSG00000079728 Q9DAS3_MOUSE Adult female placenta cDNA, RIKEN full-length enriched library, clone:1600032G08 product:t-…	CG10098	CG10098	PAIN	FBgn0037472	CG10098 CG10098	ENSG00000144306 SCRN3 Secernin-3 (I, OMCL_OG2_82658); ENSG00000136193 SCRN1 Secernin-1 (HOMG_8853)	ENSG00000136193 SCRN1 Secernin-1 (I, COMP); ENSG00000141295 SCRN2 Secernin-2 (I, COMP); ENSG00000144306 SCRN3 Secernin-3 (COMP)	ENSMUSG00000008226 Scrn3 Secernin-3 (I, OMCL_OG2_82658); ENSMUSG00000019124 Scrn1 Secernin-1 (HOMG_8853)	ENSMUSG00000019124 Scrn1 Secernin-1 (I, COMP); ENSMUSG00000020877 Scrn2 Secernin-2 (I, COMP); ENSMUSG00000008226 Scrn3 Secernin-3 (COMP)
CG12363	Dlc90F	BP	FBgn0024432	Dlc90F Dynein light chain 90F spermatid development,microtubule-based movement	ENSG00000146425 DYNLT1 Dynein light chain Tctex-type 1 (COMP, I, HOMG_4754)	ENSG00000165169 DYNLT3 Dynein light chain Tctex-type 3 (OMCL_OG2_72724); ENSG00000146425 DYNLT1 Dynein light chain Tctex-type 1 (OMCL_OG2_72724)	ENSMUSG00000000579 Dynlt1 Dynein light chain Tctex-type 1 (I)	ENSMUSG00000000579 Dynlt1 Dynein light chain Tctex-type 1 (COMP, OMCL_OG2_72724, HOMG_4754); ENSMUSG00000079732 Q9DAS3_MOUSE Adult female placenta cDNA, RIKEN full-length enriched library, clone:1600032G08 product:t-complex testis expressed 1, full insert sequence (I, COMP); ENSMUSG00000079728 Q9DAS3_MOUSE Adult female placenta cDNA, RIKEN full-length enriched library, clone:1600032G08 product:t-…	CG5565	CG5565	PAIN	FBgn0031335	CG5565 CG5565 metabolic process	-	ENSG00000130021 HDHD1A Haloacid dehalogenase-like hydrolase domain-containing protein 1A (OMCL_OG2_71239)	-	ENSMUSG00000048875 Hdhd1a haloacid dehalogenase-like hydrolase domain (OMCL_OG2_71239)
CG12399	Mad	BP	FBgn0011648	Mad Mothers against dpp open tracheal system development,dorsal closure,imaginal disc-derived leg morphogenesis,germ-line stem cell division,wing disc anterior/posterior pattern formation,regulation of transcription from RNA polymerase II promoter,imaginal disc-derived wing morphogenesis,transforming growth factor beta receptor signaling pathway,positive regulation of synaptic growth at neuromusc…	ENSG00000170365 SMAD1 Mothers against decapentaplegic homolog 1 (I, HOMG_21196)	ENSG00000120693 SMAD9 Mothers against decapentaplegic homolog 9 (OMCL_OG2_74489, I, COMP); ENSG00000113658 SMAD5 Mothers against decapentaplegic homolog 5 (OMCL_OG2_74489, I, COMP); ENSG00000170365 SMAD1 Mothers against decapentaplegic homolog 1 (OMCL_OG2_74489, COMP)	ENSMUSG00000031681 Smad1 Mothers against decapentaplegic homolog 1 (I, HOMG_21196)	ENSMUSG00000021540 Smad5 Mothers against decapentaplegic homolog 5 (OMCL_OG2_74489, I, COMP); ENSMUSG00000027796 Smad9 Mothers against decapentaplegic homolog 9 (OMCL_OG2_74489, I, COMP); ENSMUSG00000031681 Smad1 Mothers against decapentaplegic homolog 1 (OMCL_OG2_74489, COMP)	CG4673	CG4673	PAIN	FBgn0039348	CG4673 CG4673	ENSG00000182446 NPLOC4 Nuclear protein localization protein 4 homolog (COMP, I, OMCL_OG2_72170); 55666 NPLOC4 (HOMG_5403)	-	ENSMUSG00000039703 Nploc4 Nuclear protein localization protein 4 homolog (HOMG_5403, COMP, I, OMCL_OG2_72170)	-
CG12399	Mad	BP	FBgn0011648	Mad Mothers against dpp open tracheal system development,dorsal closure,imaginal disc-derived leg morphogenesis,germ-line stem cell division,wing disc anterior/posterior pattern formation,regulation of transcription from RNA polymerase II promoter,imaginal disc-derived wing morphogenesis,transforming growth factor beta receptor signaling pathway,positive regulation of synaptic growth at neuromusc…	ENSG00000170365 SMAD1 Mothers against decapentaplegic homolog 1 (I, HOMG_21196)	ENSG00000120693 SMAD9 Mothers against decapentaplegic homolog 9 (OMCL_OG2_74489, I, COMP); ENSG00000113658 SMAD5 Mothers against decapentaplegic homolog 5 (OMCL_OG2_74489, I, COMP); ENSG00000170365 SMAD1 Mothers against decapentaplegic homolog 1 (OMCL_OG2_74489, COMP)	ENSMUSG00000031681 Smad1 Mothers against decapentaplegic homolog 1 (I, HOMG_21196)	ENSMUSG00000021540 Smad5 Mothers against decapentaplegic homolog 5 (OMCL_OG2_74489, I, COMP); ENSMUSG00000027796 Smad9 Mothers against decapentaplegic homolog 9 (OMCL_OG2_74489, I, COMP); ENSMUSG00000031681 Smad1 Mothers against decapentaplegic homolog 1 (OMCL_OG2_74489, COMP)	CG4795	Cpn	PAIN	FBgn0010218	Cpn Calphotin rhabdomere development	-	-	-	-
CG12470	CG12470	BP	FBgn0040371	CG12470 CG12470	-	-	-	-	CG1725	dlg1	PAIN	FBgn0001624	dlg1 discs large 1 morphogenesis of follicular epithelium,negative regulation of cell proliferation,establishment and/or maintenance of neuroblast polarity,septate junction assembly,basal protein localization,morphogenesis of a polarized epithelium,neuron differentiation,establishment and/or maintenance of polarity of embryonic epithelium,morphogenesis of an epithelium,establishment and/or mainte…	ENSG00000075711 DLG1 Disks large homolog 1 (I, HOMG_20869)	ENSG00000082458 DLG3 Discs large homolog 3 (I, OMCL_OG2_73729); ENSG00000132535 DLG4 Discs large homolog 4 (I, OMCL_OG2_73729); ENSG00000150672 DLG2 Discs large homolog 2 (I, OMCL_OG2_73729); ENSG00000075711 DLG1 Disks large homolog 1 (OMCL_OG2_73729)	ENSMUSG00000022770 Dlg1 Disks large homolog 1 (I, HOMG_20869)	ENSMUSG00000052572 Dlg2 Disks large homolog 2 (I, OMCL_OG2_73729); ENSMUSG00000020886 Dlg4 Disks large homolog 4 (I, OMCL_OG2_73729); ENSMUSG00000000881 Dlg3 Disks large homolog 3 (I, OMCL_OG2_73729); ENSMUSG00000022770 Dlg1 Disks large homolog 1 (OMCL_OG2_73729)
CG12470	CG12470	BP	FBgn0040371	CG12470 CG12470	-	-	-	-	CG4795	Cpn	PAIN	FBgn0010218	Cpn Calphotin rhabdomere development	-	-	-	-
CG12645	CG12645	PAIN	FBgn0030181	CG12645 CG12645	-	-	-	-	CG12085	pUf68	BP	FBgn0028577	pUf68 poly U binding factor 68kD cystoblast division,regulation of cell cycle,nuclear mRNA splicing, via spliceosome,regulation of alternative nuclear mRNA splicing, via spliceosome,alternative nuclear mRNA splicing, via spliceosome,mRNA splice site selection	ENSG00000179950 PUF60 poly-U binding splicing factor 60KDa isoform b (OMCL_OG2_75077, COMP, I); 22827 PUF60 (HOMG_8614)	-	ENSMUSG00000002524 Puf60 Poly-binding-splicing factor PUF60 -binding-splicing factor (OMCL_OG2_75077, COMP, I, HOMG_8614)	-
CG12645	CG12645	PAIN	FBgn0030181	CG12645 CG12645	-	-	-	-	CG32491	mod(mdg4)	BP	FBgn0002781	mod(mdg4) modifier of mdg4 regulation of chromatin assembly or disassembly,establishment and/or maintenance of chromatin architecture,regulation of apoptosis,induction of apoptosis,germ cell migration,male meiosis I,male meiosis chromosome segregation,nuclear organization and biogenesis,oogenesis	-	ENSG00000181722 ZBTB20 Zinc finger and BTB domain-containing protein 20 (COMP); ENSG00000119574 ZBTB45 Zinc finger and BTB domain-containing protein 45 (COMP)	-	ENSMUSG00000022708 Zbtb20 zinc finger and BTB domain containing 20 (COMP); ENSMUSG00000049600 Zbtb45 zinc finger and BTB domain containing 45 (COMP)
CG12673	olf413	BP	FBgn0037153	olf413 olf413 histidine catabolic process,catecholamine metabolic process	-	ENSG00000079931 MOXD1 monooxygenase, DBH-like 1 isoform 2 (COMP, OMCL_OG2_76329); ENSG00000204986 \N \N (COMP)	-	ENSMUSG00000020000 Moxd1 DBH-like monooxygenase protein 1 precursor (COMP, OMCL_OG2_76329); ENSMUSG00000029885 Moxd2 DBH-like monooxygenase protein 2 precursor (COMP)	CG11033	CG11033	PAIN	FBgn0037659	CG11033 CG11033	ENSG00000089094 FBXL10 JmjC domain-containing histone demethylation protein 1B Jumonji domain-containing EMSY (I); 84678 FBXL10 (HOMG_13069)	ENSG00000173120 FBXL11 JmjC domain-containing histone demethylation protein 1A (I, COMP, OMCL_OG2_73026); ENSG00000089094 FBXL10 JmjC domain-containing histone demethylation protein 1B Jumonji domain-containing EMSY (COMP, OMCL_OG2_73026); ENSG00000006459 JHDM1D JmjC domain-containing histone demethylation protein 1D (COMP); ENSG00000099364 FBXL19 F-box/LRR-repeat protein 19 (COMP); ENSG000001729…	ENSMUSG00000029475 Fbxl10 JmjC domain-containing histone demethylation protein 1B (HOMG_13069, I)	ENSMUSG00000054611 Fbxl11 JmjC domain-containing histone demethylation protein 1A (I, COMP, OMCL_OG2_73026); ENSMUSG00000029475 Fbxl10 JmjC domain-containing histone demethylation protein 1B (COMP, OMCL_OG2_73026); ENSMUSG00000038025 Phf2 PHD finger protein 2 (COMP); ENSMUSG00000030811 Fbxl19 F-box/LRR-repeat protein 19 (COMP); ENSMUSG00000042599 Jhdm1d JmjC domain-containing histone demethylatio…
CG12673	olf413	BP	FBgn0037153	olf413 olf413 histidine catabolic process,catecholamine metabolic process	-	ENSG00000079931 MOXD1 monooxygenase, DBH-like 1 isoform 2 (COMP, OMCL_OG2_76329); ENSG00000204986 \N \N (COMP)	-	ENSMUSG00000020000 Moxd1 DBH-like monooxygenase protein 1 precursor (COMP, OMCL_OG2_76329); ENSMUSG00000029885 Moxd2 DBH-like monooxygenase protein 2 precursor (COMP)	CG4217	TFAM	PAIN	FBgn0038805	TFAM mitochondrial transcription factor A positive regulation of transcription, DNA-dependent,mitochondrial DNA replication,regulation of transcription	ENSG00000108064 TFAM Transcription factor A, mitochondrial precursor (OMCL_OG2_79568, I, HOMG_31139)	-	ENSMUSG00000003923 Tfam Transcription factor A, mitochondrial precursor (OMCL_OG2_79568, I, HOMG_31139)	-
CG12673	olf413	BP	FBgn0037153	olf413 olf413 histidine catabolic process,catecholamine metabolic process	-	ENSG00000079931 MOXD1 monooxygenase, DBH-like 1 isoform 2 (COMP, OMCL_OG2_76329); ENSG00000204986 \N \N (COMP)	-	ENSMUSG00000020000 Moxd1 DBH-like monooxygenase protein 1 precursor (COMP, OMCL_OG2_76329); ENSMUSG00000029885 Moxd2 DBH-like monooxygenase protein 2 precursor (COMP)	CG10800	Rca1	PAIN	FBgn0017551	Rca1 Regulator of cyclin A1 eye-antennal disc morphogenesis,compound eye morphogenesis,G2 phase of mitotic cell cycle,G1/S transition of mitotic cell cycle,regulation of mitosis,negative regulation of protein catabolic process	-	-	-	-
CG12725	CG12725	BP	FBgn0030483	CG12725 CG12725 protein modification process	-	-	-	-	CG5330	Nap1	PAIN	FBgn0015268	Nap1 Nucleosome assembly protein 1 regulation of transcription, DNA-dependent,nucleosome assembly	ENSG00000187109 NAP1L1 Nucleosome assembly protein 1-like 1 (HOMG_4355, OMCL_OG2_71620, I)	ENSG00000205531 NAP1L4 Nucleosome assembly protein 1-like 4 (I, COMP); ENSG00000186462 NAP1L2 Nucleosome assembly protein 1-like 2 (COMP); ENSG00000204118 NAP1L6 \N (COMP); ENSG00000186310 NAP1L3 Nucleosome assembly protein 1-like 3 (COMP); ENSG00000187109 NAP1L1 Nucleosome assembly protein 1-like 1 (COMP)	ENSMUSG00000058799 Nap1l1 Nucleosome assembly protein 1-like 1 (HOMG_4355, OMCL_OG2_71620, I)	ENSMUSG00000059119 Nap1l4 Nucleosome assembly protein 1-like 4 (I, COMP); ENSMUSG00000058799 Nap1l1 Nucleosome assembly protein 1-like 1 (COMP); ENSMUSG00000055733 Nap1l3 Nucleosome assembly protein 1-like 3 (COMP)
CG12766	CG12766	BP	FBgn0035476	CG12766 CG12766	-	ENSG00000085662 AKR1B1 Aldose reductase (OMCL_OG2_70651, COMP); ENSG00000122787 AKR1D1 3-oxo-5-beta-steroid 4-dehydrogenase -3- ketosteroid 5-beta-reductase (OMCL_OG2_70651, COMP); ENSG00000165568 AKR1CL2 Aldo-keto reductase family 1 member C-like protein 2 (OMCL_OG2_70651, COMP); ENSG00000198074 AKR1B10 Aldo-keto reductase family 1 member B10 (OMCL_OG2_70651, COMP); ENSG00000187134 AKR1C1 Aldo-k…	-	ENSMUSG00000061758 2310005E10Rik aldo-keto reductase family 1, member B10 (OMCL_OG2_70651, COMP); ENSMUSG00000038641 Akr1d1 3-oxo-5-beta-steroid 4-dehydrogenase -3- ketosteroid 5-beta-reductase (OMCL_OG2_70651, COMP); ENSMUSG00000052131 Akr1b7 Aldose reductase-related protein 1 (OMCL_OG2_70651, COMP); ENSMUSG00000045410 Akr1e1 Aldo-keto reductase family 1 member E1 (OMCL_OG2_70651, COMP); ENSMUSG…	CG30427	CG30427	PAIN	FBgn0043792	CG30427 CG30427 phagocytosis, engulfment,metabolic process	-	ENSG00000064763 MLSTD1 Fatty acyl-CoA reductase 2 (COMP); ENSG00000197601 MLSTD2 Fatty acyl-CoA reductase 1 (COMP)	-	ENSMUSG00000030759 Mlstd2 Fatty acyl-CoA reductase 1 (COMP); ENSMUSG00000030303 Mlstd1 Fatty acyl-CoA reductase 2 (COMP)
CG12833	esn	BP	FBgn0028642	esn espinas	ENSG00000012211 LMO6 LIM domain only protein 6 (I); ENSG00000163637 PRICKLE2 Prickle-like protein 2 (I)	ENSG00000139174 PRICKLE1 Prickle-like protein 1 (OMCL_OG2_74977, I); ENSG00000163637 PRICKLE2 Prickle-like protein 2 (OMCL_OG2_74977)	ENSMUSG00000031145 Prickle3 Prickle-like protein 3 (I)	ENSMUSG00000030020 Prickle2 Prickle-like protein 2 (OMCL_OG2_74977, I); ENSMUSG00000036158 Prickle1 Prickle-like protein 1 (OMCL_OG2_74977, I); ENSMUSG00000031145 Prickle3 Prickle-like protein 3 (I)	CG6724	CG6724	PAIN	FBgn0032298	CG6724 CG6724	ENSG00000138442 WDR12 WD repeat protein 12 (OMCL_OG2_72389, COMP, I, HOMG_10098)	-	ENSMUSG00000026019 Wdr12 WD repeat-containing protein 12 (COMP, I, HOMG_10098)	ENSMUSG00000026019 Wdr12 WD repeat-containing protein 12 (OMCL_OG2_72389); ENSMUSG00000048261 \N \N (OMCL_OG2_72389); MGI:3648111 EG232887 predicted gene, EG232887 (I)
CG12932	CG12932	PAIN	FBgn0033419	CG12932 CG12932	-	-	-	-	CG17666	CG17666	BP	FBgn0036311	CG17666 CG17666	-	-	-	-
CG12932	CG12932	PAIN	FBgn0033419	CG12932 CG12932	-	-	-	-	CG8280	Ef1alpha48D	BP	FBgn0000556	Ef1alpha48D Elongation factor 1Î±48D translational elongation,translation	ENSG00000156508 EEF1A1 Elongation factor 1-alpha 1 (I)	ENSG00000101210 EEF1A2 Elongation factor 1-alpha 2 (COMP, I, OMCL_OG2_70753); ENSG00000185637 EEF1AL3 Eukaryotic translation elongation factor 1 alpha-like 3 (COMP, I, OMCL_OG2_70753); ENSG00000183920 \N \N (I, OMCL_OG2_70753); ENSG00000156508 EEF1A1 Elongation factor 1-alpha 1 (COMP, OMCL_OG2_70753); ENSG00000215093 \N \N (COMP)	ENSMUSG00000037742 Eef1a1 Elongation factor 1-alpha 1 (I)	ENSMUSG00000016349 Eef1a2 Elongation factor 1-alpha 2 (COMP, I, OMCL_OG2_70753); ENSMUSG00000037742 Eef1a1 Elongation factor 1-alpha 1 (COMP, OMCL_OG2_70753); ENSMUSG00000052588 (OMCL_OG2_70753); ENSMUSG00000068225 (OMCL_OG2_70753)
CG12932	CG12932	PAIN	FBgn0033419	CG12932 CG12932	-	-	-	-	CG8854	CG8854	BP	FBgn0033702	CG8854 CG8854	-	-	-	-
CG12932	CG12932	PAIN	FBgn0033419	CG12932 CG12932	-	-	-	-	CG7570	hale	BP	FBgn0036924	hale hale-bopp biological_process	-	-	-	-
CG12932	CG12932	PAIN	FBgn0033419	CG12932 CG12932	-	-	-	-	CG7285	star1	BP	FBgn0036790	star1 allatostatin C receptor 1 G-protein coupled receptor protein signaling pathway	ENSG00000132671 SSTR4 Somatostatin receptor type 4 (HOMG_20286)	ENSG00000180616 SSTR2 Somatostatin receptor type 2 (COMP, I, OMCL_OG2_75535); ENSG00000132671 SSTR4 Somatostatin receptor type 4 (COMP, I); ENSG00000139874 SSTR1 Somatostatin receptor type 1 (COMP, I); ENSG00000183473 SSTR3 Somatostatin receptor type 3 (COMP, I); ENSG00000162009 SSTR5 Somatostatin receptor type 5 (COMP, I); ENSG00000125510 OPRL1 Nociceptin receptor (COMP); ENSG00000125522 NPBWR2 …	ENSMUSG00000037014 Sstr4 Somatostatin receptor type 4 (HOMG_20286)	ENSMUSG00000047904 Sstr2 Somatostatin receptor type 2 (COMP, I, OMCL_OG2_75535); ENSMUSG00000044933 Sstr3 Somatostatin receptor type 3 (COMP, I); ENSMUSG00000050824 Sstr5 Somatostatin receptor type 5 (COMP, I); ENSMUSG00000037014 Sstr4 Somatostatin receptor type 4 (COMP, I); ENSMUSG00000035431 Sstr1 Somatostatin receptor type 1 (COMP, I); ENSMUSG00000027584 Oprl1 Nociceptin receptor (COMP); ENSMU…
CG12932	CG12932	PAIN	FBgn0033419	CG12932 CG12932	-	-	-	-	CG33103	Ppn	BP	FBgn0003137	Ppn Papilin extracellular matrix organization and biogenesis	ENSG00000100767 PAPLN papilin (I, OMCL_OG2_77294, HOMG_71541)	-	ENSMUSG00000021223 Papln papilin (I, OMCL_OG2_77294, HOMG_71541)	-
CG12932	CG12932	PAIN	FBgn0033419	CG12932 CG12932	-	-	-	-	CG9184	CG9184	BP	FBgn0035208	CG9184 CG9184	ENSG00000120306 C5orf32 Putative nuclear protein (COMP)	-	ENSMUSG00000046727 0610010O12Rik UPF0467 protein C5orf32 homolog (COMP)	-
CG12932	CG12932	PAIN	FBgn0033419	CG12932 CG12932	-	-	-	-	CG3510	CycB	BP	FBgn0000405	CycB Cyclin B cytokinesis after mitosis,mitotic anaphase B,cellular process,G2/M transition of mitotic cell cycle,mitotic chromosome movement towards spindle pole,attachment of spindle microtubules to kinetochore,embryonic development via the syncytial blastoderm,cytokinesis	ENSG00000134057 CCNB1 G2/mitotic-specific cyclin-B1 (HOMG_68982, I)	ENSG00000157456 CCNB2 G2/mitotic-specific cyclin-B2 (I, COMP, OMCL_OG2_70718); ENSG00000134057 CCNB1 G2/mitotic-specific cyclin-B1 (COMP, OMCL_OG2_70718); ENSG00000133101 CCNA1 Cyclin-A1 (OMCL_OG2_70718); ENSG00000147082 CCNB3 G2/mitotic-specific cyclin-B3 (OMCL_OG2_70718); ENSG00000145386 CCNA2 Cyclin-A2 (OMCL_OG2_70718)	ENSMUSG00000041431 Ccnb1 G2/mitotic-specific cyclin-B1 (I)	ENSMUSG00000041431 Ccnb1 G2/mitotic-specific cyclin-B1 (HOMG_68982, COMP, OMCL_OG2_70718); ENSMUSG00000032218 Ccnb2 G2/mitotic-specific cyclin-B2 (I, COMP, OMCL_OG2_70718); ENSMUSG00000048574 \N \N (I, COMP); ENSMUSG00000043545 (HOMG_68982, OMCL_OG2_70718); MGI:3648694 EG434175 predicted gene, EG434175 (I); ENSMUSG00000051592 Ccnb3 G2/mitotic-specific cyclin-B3 (OMCL_OG2_70718); ENSMUSG0000002779…
CG12932	CG12932	PAIN	FBgn0033419	CG12932 CG12932	-	-	-	-	CG5383	PSR	BP	FBgn0038948	PSR phosphatidylserine receptor negative regulation of apoptosis	ENSG00000070495 JMJD6 JmjC domain-containing protein 6 (OMCL_OG2_73153, COMP, I); 23210 JMJD6 (HOMG_9046)	-	ENSMUSG00000056962 Jmjd6 Histone arginine demethylase JMJD6 (OMCL_OG2_73153, HOMG_9046, COMP, I)	-
CG12932	CG12932	PAIN	FBgn0033419	CG12932 CG12932	-	-	-	-	CG13700	CG13700	BP	FBgn0036785	CG13700 CG13700	-	-	-	-
CG12932	CG12932	PAIN	FBgn0033419	CG12932 CG12932	-	-	-	-	CG8942	CG8942	BP	FBgn0028545	CG8942 CG8942 Wnt receptor signaling pathway	-	-	-	-
CG12954	mRpL41	PAIN	FBgn0034001	mRpL41 mitochondrial ribosomal protein L41 translation	ENSG00000182154 MRPL41 39S ribosomal protein L41, mitochondrial precursor (OMCL_OG2_78399, COMP, I)	-	ENSMUSG00000036850 Mrpl41 39S ribosomal protein L41, mitochondrial precursor (OMCL_OG2_78399, I); MGI:3648424 EG623475 predicted gene, EG623475 (I)	ENSMUSG00000036850 Mrpl41 39S ribosomal protein L41, mitochondrial precursor (COMP); ENSMUSG00000080085 \N \N (COMP)	CG14962	CG14962	BP	FBgn0035407	CG14962 CG14962	ENSG00000166454 K0431_HUMAN Uncharacterized protein KIAA0431 (COMP, OMCL_OG2_79910)	-	ENSMUSG00000047388 Atmin ATM interactor (COMP, I, OMCL_OG2_79910)	-
CG12954	mRpL41	PAIN	FBgn0034001	mRpL41 mitochondrial ribosomal protein L41 translation	ENSG00000182154 MRPL41 39S ribosomal protein L41, mitochondrial precursor (OMCL_OG2_78399, COMP, I)	-	ENSMUSG00000036850 Mrpl41 39S ribosomal protein L41, mitochondrial precursor (OMCL_OG2_78399, I); MGI:3648424 EG623475 predicted gene, EG623475 (I)	ENSMUSG00000036850 Mrpl41 39S ribosomal protein L41, mitochondrial precursor (COMP); ENSMUSG00000080085 \N \N (COMP)	CG5792	CG5792	BP	FBgn0032455	CG5792 CG5792	ENSG00000104872 PIH1D1 NOP17 (HOMG_9914, I)	ENSG00000104872 PIH1D1 NOP17 (COMP, OMCL_OG2_73633); ENSG00000165506 C14orf104 Uncharacterized protein C14orf104 (COMP)	ENSMUSG00000003423 Pih1d1 PIH1 domain-containing protein 1 (HOMG_9914, COMP, I)	ENSMUSG00000003423 Pih1d1 PIH1 domain-containing protein 1 (OMCL_OG2_73633)
CG12975	CG12975	PAIN	FBgn0037061	CG12975 CG12975 biological_process	ENSG00000173113 TR112_HUMAN TRM112-like protein (COMP, I); ENSG00000173596 (HOMG_83436)	ENSG00000173596 (I, OMCL_OG2_72391); ENSG00000173113 TR112_HUMAN TRM112-like protein (OMCL_OG2_72391)	627985 LOC627985 (HOMG_83436); ENSMUSG00000038812 0610038D11Rik TRM112-like protein (I)	ENSMUSG00000057627 NP_0011047431 \N (I, COMP, OMCL_OG2_72391); ENSMUSG00000038812 0610038D11Rik TRM112-like protein (COMP, OMCL_OG2_72391); ENSMUSG00000071762 \N \N (I, COMP); ENSMUSG00000070572 NM_0011112731 predicted gene, EG665860 , mRNA (OMCL_OG2_72391); MGI:3643840 EG665860 predicted gene, EG665860 (I)	CG3052	HLH4C	BP	FBgn0011277	HLH4C Helix loop helix protein 4C regulation of transcription	ENSG00000171786 NHLH1 Helix-loop-helix protein 1 (HOMG_4089, I)	ENSG00000177551 NHLH2 Helix-loop-helix protein 2 (OMCL_OG2_78258, I, COMP); ENSG00000171786 NHLH1 Helix-loop-helix protein 1 (OMCL_OG2_78258, COMP)	ENSMUSG00000051251 Nhlh1 Helix-loop-helix protein 1 (HOMG_4089, I); MGI:98481 Nhlh1 nescient helix loop helix 1 (I)	ENSMUSG00000048540 Nhlh2 Helix-loop-helix protein 2 (OMCL_OG2_78258, I, COMP); ENSMUSG00000051251 Nhlh1 Helix-loop-helix protein 1 (OMCL_OG2_78258, COMP)
CG12975	CG12975	PAIN	FBgn0037061	CG12975 CG12975 biological_process	ENSG00000173113 TR112_HUMAN TRM112-like protein (COMP, I); ENSG00000173596 (HOMG_83436)	ENSG00000173596 (I, OMCL_OG2_72391); ENSG00000173113 TR112_HUMAN TRM112-like protein (OMCL_OG2_72391)	627985 LOC627985 (HOMG_83436); ENSMUSG00000038812 0610038D11Rik TRM112-like protein (I)	ENSMUSG00000057627 NP_0011047431 \N (I, COMP, OMCL_OG2_72391); ENSMUSG00000038812 0610038D11Rik TRM112-like protein (COMP, OMCL_OG2_72391); ENSMUSG00000071762 \N \N (I, COMP); ENSMUSG00000070572 NM_0011112731 predicted gene, EG665860 , mRNA (OMCL_OG2_72391); MGI:3643840 EG665860 predicted gene, EG665860 (I)	CG13867	MED8	BP	FBgn0034503	MED8 Mediator complex subunit 8 transcription initiation from RNA polymerase II promoter,transcription from RNA polymerase II promoter	ENSG00000159479 MED8 Mediator of RNA polymerase II transcription subunit 8 homolog (COMP, I, OMCL_OG2_78217, HOMG_10560)	-	ENSMUSG00000006392 Med8 Mediator of RNA polymerase II transcription subunit 8 (COMP, I, OMCL_OG2_78217, HOMG_10560)	-
CG13032	CG13032	BP	FBgn0036652	CG13032 CG13032	ENSG00000173811 CCDC13 Coiled-coil domain-containing protein 13 (COMP, I, HOMG_87213, OMCL_OG2_76398)	-	ENSMUSG00000061181 Ccdc13 coiled-coil domain containing 13 (OMCL_OG2_76398)	ENSMUSG00000061181 Ccdc13 coiled-coil domain containing 13 (COMP); ENSMUSG00000079235 Ccdc13 Adult male hippocampus cDNA, RIKEN full-length enriched library, clone:2900041A11 product:hypothetical protein, full insert sequence (COMP)	CG6972	CG6972	PAIN	FBgn0039008	CG6972 CG6972	ENSG00000100418 NP_0565191 DJ347H134 protein (COMP)	ENSG00000167280 NP_0010360381 endo-beta-N-acetylglucosaminidase (OMCL_OG2_71252); ENSG00000100418 NP_0565191 DJ347H134 protein (OMCL_OG2_71252)	ENSMUSG00000022472 D15Wsu75e Adult male testis cDNA, RIKEN full-length enriched library, clone:1700013M01 product:hypothetical protein, full insert sequence CRL-1722 L5178Y-R cDNA, RIKEN full-length enriched library, clone: (COMP)	ENSMUSG00000033857 D230014K01Rik endo-beta-N-acetylglucosaminidase (OMCL_OG2_71252); ENSMUSG00000022472 D15Wsu75e Adult male testis cDNA, RIKEN full-length enriched library, clone:1700013M01 product:hypothetical protein, full insert sequence CRL-1722 L5178Y-R cDNA, RIKEN full-length enriched library, clone: (OMCL_OG2_71252)
CG13032	CG13032	BP	FBgn0036652	CG13032 CG13032	ENSG00000173811 CCDC13 Coiled-coil domain-containing protein 13 (COMP, I, HOMG_87213, OMCL_OG2_76398)	-	ENSMUSG00000061181 Ccdc13 coiled-coil domain containing 13 (OMCL_OG2_76398)	ENSMUSG00000061181 Ccdc13 coiled-coil domain containing 13 (COMP); ENSMUSG00000079235 Ccdc13 Adult male hippocampus cDNA, RIKEN full-length enriched library, clone:2900041A11 product:hypothetical protein, full insert sequence (COMP)	CG3612	blw	PAIN	FBgn0011211	blw bellwether spermatid development,phagocytosis, engulfment,growth,proton transport,ATP synthesis coupled proton transport	ENSG00000152234 ATP5A1 ATP synthase subunit alpha, mitochondrial precursor (OMCL_OG2_71070, HOMG_2985, COMP, I)	-	ENSMUSG00000025428 Atp5a1 ATP synthase subunit alpha, mitochondrial precursor (OMCL_OG2_71070, HOMG_2985, COMP, I)	-
CG13047	CG13047	PAIN	FBgn0036594	CG13047 CG13047	-	-	-	-	CG1378	tll	BP	FBgn0003720	tll tailless compound eye development,cell fate specification,Bolwig's organ morphogenesis,anterior/posterior axis specification,gastrulation,regulation of transcription, DNA-dependent,terminal region determination,torso signaling pathway,cell fate commitment,optic lobe placode development,ring gland development,transcription, DNA-dependent	ENSG00000112333 NR2E1 Orphan nuclear receptor NR2E1 (OMCL_OG2_78731, COMP)	-	ENSMUSG00000019803 Nr2e1 Nuclear receptor subfamily 2 group E member 1 (OMCL_OG2_78731, COMP)	-
CG13047	CG13047	PAIN	FBgn0036594	CG13047 CG13047	-	-	-	-	CG7021	Ela	BP	FBgn0013949	Ela Elastin-like phosphate transport	-	-	-	-
CG13074	CG13074	PAIN	FBgn0036567	CG13074 CG13074	-	-	-	-	CG5450	Cdlc2	BP	FBgn0026141	Cdlc2 Cytoplasmic dynein light chain 2 microtubule-based process,microtubule-based movement	ENSG00000088986 DYNLL1 Dynein light chain 1, cytoplasmic (HOMG_37844)	ENSG00000121083 DYNLL2 Dynein light chain 2, cytoplasmic (OMCL_OG2_71625, I); ENSG00000088986 DYNLL1 Dynein light chain 1, cytoplasmic (OMCL_OG2_71625, COMP)	ENSMUSG00000009013 Dynll1 Dynein light chain 1, cytoplasmic (HOMG_37844)	ENSMUSG00000064063 BC048507 cDNA sequence BC048507 (OMCL_OG2_71625, COMP); ENSMUSG00000009013 Dynll1 Dynein light chain 1, cytoplasmic (OMCL_OG2_71625, COMP); ENSMUSG00000020483 Dynll2 Dynein light chain 2, cytoplasmic (OMCL_OG2_71625, I)
CG13074	CG13074	PAIN	FBgn0036567	CG13074 CG13074	-	-	-	-	CG10751	robl	BP	FBgn0024196	robl roadblock mushroom body development,microtubule-based movement,dendrite morphogenesis	ENSG00000168589 DYNLRB2 Dynein light chain roadblock-type 2 (HOMG_12601, I)	ENSG00000168589 DYNLRB2 Dynein light chain roadblock-type 2 (OMCL_OG2_72796, COMP); ENSG00000125971 DYNLRB1 Dynein light chain roadblock-type 1 (OMCL_OG2_72796, COMP)	ENSMUSG00000034467 Dynlrb2 Dynein light chain roadblock-type 2 (HOMG_12601, I)	ENSMUSG00000034467 Dynlrb2 Dynein light chain roadblock-type 2 (OMCL_OG2_72796, COMP); ENSMUSG00000047459 Dynlrb1 Dynein light chain roadblock-type 1 (OMCL_OG2_72796, COMP)
CG13074	CG13074	PAIN	FBgn0036567	CG13074 CG13074	-	-	-	-	CG17420	RpL15	BP	FBgn0028697	RpL15 Ribosomal protein L15 translation	ENSG00000174748 RPL15 60S ribosomal protein L15 (HOMG_84709)	ENSG00000174748 RPL15 60S ribosomal protein L15 (OMCL_OG2_71226, COMP); ENSG00000174766 NP_0010830591 similar to ribosomal protein L15 , mRNA (OMCL_OG2_71226, COMP); ENSG00000212802 Q5T6E0_HUMAN Ribosomal protein L15 pseudogene 3 (COMP); ENSG00000215003 \N \N (COMP)	ENSMUSG00000061167 Rpl15 60S ribosomal protein L15 (I); ENSMUSG00000012405 Rpl15 60S ribosomal protein L15 (I); 100043209 LOC100043209 (HOMG_84709)	ENSMUSG00000073229 EG628994 Ribosomal protein L15 (OMCL_OG2_71226, I, COMP); ENSMUSG00000012405 Rpl15 60S ribosomal protein L15 (OMCL_OG2_71226, COMP); ENSMUSG00000059565 \N \N (I, COMP); ENSMUSG00000078377 \N \N (I, COMP); ENSMUSG00000057262 \N \N (OMCL_OG2_71226); ENSMUSG00000080020 \N \N (COMP); ENSMUSG00000061167 Rpl15 60S ribosomal protein L15 (COMP); ENSMUSG00000066834 (OMCL_OG2_71226)
CG13083	CG13083	BP	FBgn0032789	CG13083 CG13083	-	-	-	-	CG14750	Vps25	PAIN	FBgn0022027	Vps25 Vacuolar protein sorting 25 cell differentiation,cell proliferation,endosome transport,regulation of apoptosis	ENSG00000131475 VPS25 Vacuolar protein sorting-associated protein 25 (HOMG_6303, OMCL_OG2_74267, COMP, I)	-	ENSMUSG00000078656 Vps25 Vacuolar protein-sorting-associated protein 25 (COMP, I); ENSMUSG00000060634 (HOMG_6303)	-
CG13083	CG13083	BP	FBgn0032789	CG13083 CG13083	-	-	-	-	CG30404	Tango11	PAIN	FBgn0050404	Tango11 Transport and Golgi organization biological_process	ENSG00000168958 C2orf33 Uncharacterized protein C2orf33 (COMP, I)	-	ENSMUSG00000026150 5230400G24Rik Uncharacterized protein C2orf33 homolog (COMP, I)	MGI:3645666 EG628871 predicted gene, EG628871 (I)
CG13114	CG13114	BP	FBgn0032127	CG13114 CG13114	-	-	-	-	CG17003	CG17003	PAIN	FBgn0031082	CG17003 CG17003	ENSG00000137343 C6orf134 CDNA FLJ13158 fis, clone NT2RP3003552 (HOMG_15129, I); ENSG00000206488 NP_0010268921 CDNA FLJ13158 fis, clone NT2RP3003552 (I); ENSG00000206405 C6orf134 CDNA FLJ13158 fis, clone NT2RP3003552 (I)	ENSG00000137343 C6orf134 CDNA FLJ13158 fis, clone NT2RP3003552 (OMCL_OG2_74416); ENSG00000206488 NP_0010268921 CDNA FLJ13158 fis, clone NT2RP3003552 (OMCL_OG2_74416); ENSG00000206405 C6orf134 CDNA FLJ13158 fis, clone NT2RP3003552 (OMCL_OG2_74416)	ENSMUSG00000024426 2610110G12Rik RIKEN cDNA 2610110G12 gene , mRNA (HOMG_15129)	ENSMUSG00000024426 2610110G12Rik RIKEN cDNA 2610110G12 gene , mRNA (I, OMCL_OG2_74416)
CG13159	CG13159	BP	FBgn0033721	CG13159 CG13159	-	-	-	-	CG5380	CG5380	PAIN	FBgn0038951	CG5380 CG5380 transcription,transcription from RNA polymerase III promoter	ENSG00000132664 POLR3F DNA-directed RNA polymerase III subunit RPC6 (HOMG_4722, COMP, I, OMCL_OG2_72557)	-	ENSMUSG00000027427 Polr3f DNA-directed RNA polymerase III subunit RPC6 (HOMG_4722, COMP, I, OMCL_OG2_72557)	-
CG13159	CG13159	BP	FBgn0033721	CG13159 CG13159	-	-	-	-	CG7109	mts	PAIN	FBgn0004177	mts microtubule star regulation of cell shape,phagocytosis, engulfment,protein amino acid dephosphorylation,mitosis,R7 cell fate commitment,actin filament organization,cell adhesion,spindle organization and biogenesis,oogenesis	ENSG00000104695 PPP2CB Serine/threonine-protein phosphatase 2A catalytic subunit beta isoform (I, HOMG_37889)	ENSG00000113575 PPP2CA Serine/threonine-protein phosphatase 2A catalytic subunit alpha isoform (I, COMP, OMCL_OG2_71286); ENSG00000104695 PPP2CB Serine/threonine-protein phosphatase 2A catalytic subunit beta isoform (COMP, OMCL_OG2_71286)	ENSMUSG00000009630 Ppp2cb Serine/threonine-protein phosphatase 2A catalytic subunit beta isoform (I, HOMG_37889)	ENSMUSG00000020349 Ppp2ca Serine/threonine-protein phosphatase 2A catalytic subunit alpha isoform (I, COMP, OMCL_OG2_71286); ENSMUSG00000009630 Ppp2cb Serine/threonine-protein phosphatase 2A catalytic subunit beta isoform (COMP, OMCL_OG2_71286)
CG13196	CG13196	PAIN	FBgn0033645	CG13196 CG13196	-	-	-	-	CG5866	CG5866	BP	FBgn0038508	CG5866 CG5866	-	-	-	-
CG13214	Cpr47Ef	BP	FBgn0033603	Cpr47Ef Cuticular protein 47Ef phosphate transport	-	-	-	-	CG7145	CG7145	PAIN	FBgn0037138	CG7145 CG7145 proline biosynthetic process,proline metabolic process	ENSG00000159423 ALDH4A1 Delta-1-pyrroline-5-carboxylate dehydrogenase, mitochondrial precursor (HOMG_6081, COMP, I)	ENSG00000179002 TAS1R2 Taste receptor type 1 member 2 precursor (OMCL_OG2_72378); ENSG00000159423 ALDH4A1 Delta-1-pyrroline-5-carboxylate dehydrogenase, mitochondrial precursor (OMCL_OG2_72378)	ENSMUSG00000028737 Aldh4a1 Delta-1-pyrroline-5-carboxylate dehydrogenase, mitochondrial precursor (HOMG_6081, COMP, I)	ENSMUSG00000028738 Tas1r2 Taste receptor type 1 member 2 precursor (OMCL_OG2_72378); ENSMUSG00000028737 Aldh4a1 Delta-1-pyrroline-5-carboxylate dehydrogenase, mitochondrial precursor (OMCL_OG2_72378)
CG13214	Cpr47Ef	BP	FBgn0033603	Cpr47Ef Cuticular protein 47Ef phosphate transport	-	-	-	-	CG11280	trn	PAIN	FBgn0010452	trn tartan open tracheal system development,cell migration,cell adhesion,branch fusion, open tracheal system	ENSG00000143365 RORC Nuclear receptor ROR-gamma (HOMG_18563)	ENSG00000173114 LRRN3 Leucine-rich repeat neuronal protein 3 precursor (I); ENSG00000170382 LRRN2 Leucine-rich repeat neuronal protein 5 precursor (I); ENSG00000175928 LRRN1 Leucine-rich repeat neuronal protein 1 precursor (I)	ENSMUSG00000036295 Lrrn3 Leucine-rich repeat neuronal protein 3 precursor (I); ENSMUSG00000044505 Lingo4 leucine rich repeat and Ig domain containing 4 (HOMG_18563); ENSMUSG00000026443 Lrrn2 leucine rich repeat protein 2, neuronal (I)	ENSMUSG00000034648 Lrrn1 Leucine-rich repeat neuronal protein 1 precursor (I)
CG13321	CG13321	BP	FBgn0033787	CG13321 CG13321	-	-	-	-	CG18350	Sxl	PAIN	FBgn0003659	Sxl Sex lethal female germ-line sex determination,germ cell development,regulation of nuclear mRNA splicing, via spliceosome,female sex differentiation,smoothened signaling pathway,sex determination, primary response to X:A ratio,female sex determination,alternative nuclear mRNA splicing, via spliceosome,negative regulation of nuclear mRNA splicing, via spliceosome,somatic sex determination,dosag…	-	-	-	-
CG13474	CG13474	BP	FBgn0036439	CG13474 CG13474	-	-	-	-	CG6605	BicD	PAIN	FBgn0000183	BicD Bicaudal D cell differentiation,oocyte microtubule cytoskeleton polarization,intracellular mRNA localization,oocyte anterior/posterior axis determination,oocyte microtubule cytoskeleton organization,oocyte dorsal/ventral axis determination,mRNA transport,germarium-derived oocyte fate determination,oocyte nucleus migration during oocyte axis determination,signal transduction,germarium-derived…	ENSG00000151746 BICD1 Protein bicaudal D homolog 1 (I, HOMG_37518)	ENSG00000185963 BICD2 Protein bicaudal D homolog 2 (I, COMP, OMCL_OG2_74308); ENSG00000151746 BICD1 Protein bicaudal D homolog 1 (COMP, OMCL_OG2_74308)	ENSMUSG00000003452 Bicd1 Protein bicaudal D homolog 1 (I, HOMG_37518)	ENSMUSG00000037933 Bicd2 Protein bicaudal D homolog 2 (I, COMP, OMCL_OG2_74308); ENSMUSG00000003452 Bicd1 Protein bicaudal D homolog 1 (COMP, OMCL_OG2_74308)
CG13474	CG13474	BP	FBgn0036439	CG13474 CG13474	-	-	-	-	CG5134	MED9	PAIN	FBgn0034311	MED9 Mediator complex subunit 9	ENSG00000141026 MED9 mediator complex subunit 9 (COMP)	-	ENSMUSG00000061650 Med9 Mediator of RNA polymerase II transcription subunit 9 (COMP)	-
CG13512	CG13512	BP	FBgn0034760	CG13512 CG13512	-	-	-	-	CG4550	ninaE	PAIN	FBgn0002940	ninaE neither inactivation nor afterpotential E phototransduction,G-protein coupled receptor protein signaling pathway,rhabdomere development,negative regulation of compound eye retinal cell programmed cell death,response to light intensity,adult locomotory behavior,photoreceptor cell morphogenesis	-	ENSG00000122375 OPN4 Melanopsin (OMCL_OG2_75321, I, COMP)	-	ENSMUSG00000021799 Opn4 Melanopsin (OMCL_OG2_75321, I, COMP)
CG13512	CG13512	BP	FBgn0034760	CG13512 CG13512	-	-	-	-	CG10882	CG10882	PAIN	FBgn0031408	CG10882 CG10882 intracellular protein transport,G-protein coupled receptor protein signaling pathway,ER to Golgi vesicle-mediated transport	ENSG00000176986 SEC24C Protein transport protein Sec24C (HOMG_3615, I)	ENSG00000150961 SEC24D Protein transport protein Sec24D (I, COMP, OMCL_OG2_72998); ENSG00000176986 SEC24C Protein transport protein Sec24C (COMP, OMCL_OG2_72998)	ENSMUSG00000039367 Sec24c SEC24 related gene family, member C (HOMG_3615, I)	ENSMUSG00000039234 Sec24d SEC24 related gene family, member D (I, COMP, OMCL_OG2_72998); ENSMUSG00000039367 Sec24c SEC24 related gene family, member C (COMP, OMCL_OG2_72998)
CG13623	CG13623	PAIN	FBgn0039205	CG13623 CG13623 iron-sulfur cluster assembly	ENSG00000165898 ISCA2 Iron-sulfur cluster assembly 2 homolog, mitochondrial precursor (COMP, I, HOMG_14260, OMCL_OG2_71665)	-	ENSMUSG00000021241 Isca2 Iron-sulfur cluster assembly 2 homolog, mitochondrial precursor (COMP, I, HOMG_14260, OMCL_OG2_71665)	-	CG9986	CG9986	BP	FBgn0039589	CG9986 CG9986	ENSG00000047621 C12orf4 Uncharacterized protein C12orf4 (HOMG_10685, OMCL_OG2_77548, COMP, I)	-	ENSMUSG00000030347 D6Wsu163e Uncharacterized protein C12orf4 homolog (HOMG_10685, OMCL_OG2_77548, COMP, I)	-
CG13651	danr	BP	FBgn0039283	danr distal antenna-related	ENSG00000179886 TIGD5 Tigger transposable element-derived protein 5 (OMCL_OG2_100426)	ENSG00000179886 TIGD5 Tigger transposable element-derived protein 5 (I)	-	-	CG3619	Dl	PAIN	FBgn0000463	Dl Delta open tracheal system development,cell fate specification,lateral inhibition,compound eye cone cell fate commitment,oocyte anterior/posterior axis determination,apposition of dorsal and ventral imaginal disc-derived wing surfaces,R8 cell differentiation,actin filament organization,imaginal disc-derived leg morphogenesis,mesoderm development,establishment of ommatidial polarity,peripheral …	ENSG00000198719 DLL1 Delta-like protein 1 precursor (I, HOMG_4104)	ENSG00000128917 DLL4 Delta-like protein 4 precursor (I, COMP, OMCL_OG2_74825); ENSG00000198719 DLL1 Delta-like protein 1 precursor (COMP, OMCL_OG2_74825)	ENSMUSG00000014773 Dll1 Delta-like protein 1 precursor (I, HOMG_4104)	ENSMUSG00000027314 Dll4 Delta-like protein 4 precursor (I, COMP, OMCL_OG2_74825); ENSMUSG00000014773 Dll1 Delta-like protein 1 precursor (COMP, OMCL_OG2_74825)
CG13700	CG13700	BP	FBgn0036785	CG13700 CG13700	-	-	-	-	CG34401	CG34401	PAIN	FBgn0085430	CG34401	ENSG00000214655 KIAA0913 \N (COMP); 23053 KIAA0913 (HOMG_34313); ENSG00000162415 ZSWIM5 Zinc finger SWIM domain-containing protein 5 (I)	ENSG00000130449 ZSWIM6 Zinc finger SWIM domain-containing protein 6 (I); ENSG00000132003 ZSWIM4 Zinc finger SWIM domain-containing protein 4 (I)	ENSMUSG00000021819 2310021P13Rik Zinc finger SWIM domain-containing protein KIAA0913 (HOMG_34313, COMP, I, OMCL_OG2_76846)	-
CG13761	Bzd	BP	FBgn0011566	Bzd Buzidau translational initiation	ENSG00000185420 SMYD3 SET and MYND domain-containing protein 3 (HOMG_41491, I)	ENSG00000185420 SMYD3 SET and MYND domain-containing protein 3 (COMP, OMCL_OG2_72715); ENSG00000143499 SMYD2 SET and MYND domain-containing protein 2 (COMP, OMCL_OG2_72715); ENSG00000115593 SMYD1 SET and MYND domain-containing protein 1 (COMP)	ENSMUSG00000055067 Smyd3 SET and MYND domain-containing protein 3 (HOMG_41491, I)	ENSMUSG00000055067 Smyd3 SET and MYND domain-containing protein 3 (COMP, OMCL_OG2_72715); ENSMUSG00000026603 Smyd2 SET and MYND domain-containing protein 2 (COMP, OMCL_OG2_72715); ENSMUSG00000055027 Smyd1 SET and MYND domain-containing protein 1 (COMP)	CG14506	CG14506	PAIN	FBgn0039659	CG14506 CG14506	-	-	-	-
CG13777	milt	PAIN	FBgn0022201	milt milton Nebenkern formation,axon transport of mitochondrion,mitochondrion distribution,sperm mitochondrion organization and biogenesis	ENSG00000182606 TRAK1 Trafficking kinesin-binding protein 1 (HOMG_25103, I)	ENSG00000115993 TRAK2 Trafficking kinesin-binding protein 2 (I, OMCL_OG2_75008); ENSG00000182606 TRAK1 Trafficking kinesin-binding protein 1 (OMCL_OG2_75008)	ENSMUSG00000032536 Trak1 trafficking protein, kinesin binding 1 (HOMG_25103, I); ENSMUSG00000026028 Trak2 trafficking protein, kinesin binding 2 (I)	ENSMUSG00000026028 Trak2 trafficking protein, kinesin binding 2 (I, OMCL_OG2_75008); ENSMUSG00000032536 Trak1 trafficking protein, kinesin binding 1 (I, OMCL_OG2_75008)	CG5410	Miro	BP	FBgn0039140	Miro Mitochondrial Rho cytoplasmic microtubule organization and biogenesis,mitochondrion transport along microtubule,small GTPase mediated signal transduction,cellular homeostasis,synaptic transmission,apoptosis	ENSG00000126858 RHOT1 Mitochondrial Rho GTPase 1 (HOMG_56803, I)	ENSG00000140983 RHOT2 Mitochondrial Rho GTPase 2 (I, COMP, OMCL_OG2_72706); ENSG00000126858 RHOT1 Mitochondrial Rho GTPase 1 (COMP, OMCL_OG2_72706)	ENSMUSG00000017686 Rhot1 Mitochondrial Rho GTPase 1 (HOMG_56803, I)	ENSMUSG00000025733 Rhot2 Mitochondrial Rho GTPase 2 (I, COMP, OMCL_OG2_72706); ENSMUSG00000017686 Rhot1 Mitochondrial Rho GTPase 1 (COMP, OMCL_OG2_72706)
CG13811	CG13811	BP	FBgn0036944	CG13811 CG13811	-	-	-	-	CG7015	Unr	PAIN	FBgn0035895	Unr Upstream of N-ras dosage compensation, by hyperactivation of X chromosome,negative regulation of translation,regulation of transcription, DNA-dependent	ENSG00000009307 CSDE1 Cold shock domain-containing protein E1 (OMCL_OG2_77988, COMP, I); 7812 CSDE1 (HOMG_5179)	-	ENSMUSG00000068823 Csde1 Cold shock domain-containing protein E1 (COMP, I, HOMG_5179)	ENSMUSG00000072420 (OMCL_OG2_77988); ENSMUSG00000068823 Csde1 Cold shock domain-containing protein E1 (OMCL_OG2_77988); ENSMUSG00000047588 (OMCL_OG2_77988)
CG13822	CG13822	BP	FBgn0039098	CG13822 CG13822	-	ENSG00000105648 (OMCL_OG2_73319)	-	ENSMUSG00000031838 Ifi30 interferon gamma inducible protein 30 (OMCL_OG2_73319, COMP)	CG10800	Rca1	PAIN	FBgn0017551	Rca1 Regulator of cyclin A1 eye-antennal disc morphogenesis,compound eye morphogenesis,G2 phase of mitotic cell cycle,G1/S transition of mitotic cell cycle,regulation of mitosis,negative regulation of protein catabolic process	-	-	-	-
CG13822	CG13822	BP	FBgn0039098	CG13822 CG13822	-	ENSG00000105648 (OMCL_OG2_73319)	-	ENSMUSG00000031838 Ifi30 interferon gamma inducible protein 30 (OMCL_OG2_73319, COMP)	CG4217	TFAM	PAIN	FBgn0038805	TFAM mitochondrial transcription factor A positive regulation of transcription, DNA-dependent,mitochondrial DNA replication,regulation of transcription	ENSG00000108064 TFAM Transcription factor A, mitochondrial precursor (OMCL_OG2_79568, I, HOMG_31139)	-	ENSMUSG00000003923 Tfam Transcription factor A, mitochondrial precursor (OMCL_OG2_79568, I, HOMG_31139)	-
CG13830	CG13830	BP	FBgn0039054	CG13830 CG13830	ENSG00000196104 SPOCK3 Testican-3 precursor (OMCL_OG2_79238, I)	ENSG00000152377 SPOCK1 Testican-1 precursor (I, COMP); ENSG00000107742 SPOCK2 Testican-2 precursor (I, COMP); ENSG00000167779 IGFBP6 Insulin-like growth factor-binding protein 6 precursor (COMP); ENSG00000196104 SPOCK3 Testican-3 precursor (COMP); ENSG00000146674 IGFBP3 Insulin-like growth factor-binding protein 3 precursor (COMP); ENSG00000146678 IGFBP1 Insulin-like growth factor-binding protein…	ENSMUSG00000054162 Spock3 Testican-3 precursor (OMCL_OG2_79238, I); ENSMUSG00000056222 Spock1 Testican-1 precursor (I)	ENSMUSG00000056222 Spock1 Testican-1 precursor (I, COMP); ENSMUSG00000058297 Spock2 Testican-2 precursor (I, COMP); ENSMUSG00000054162 Spock3 Testican-3 precursor (I, COMP); ENSMUSG00000023046 Igfbp6 Insulin-like growth factor-binding protein 6 precursor (COMP); ENSMUSG00000020427 Igfbp3 Insulin-like growth factor-binding protein 3 precursor (COMP); ENSMUSG00000039323 Igfbp2 Insulin-like growth f…	CG5711	Arr1	PAIN	FBgn0000120	Arr1 Arrestin 1 phototransduction,photoreceptor cell maintenance,endocytosis,metarhodopsin inactivation,deactivation of rhodopsin mediated signaling	-	ENSG00000130561 SAG S-arrestin (COMP); ENSG00000137486 ARRB1 Beta-arrestin-1 (COMP); ENSG00000141480 ARRB2 Beta-arrestin-2 (COMP); ENSG00000120500 ARR3 Arrestin-C (COMP)	-	ENSMUSG00000056055 Sag S-arrestin (COMP); ENSMUSG00000060890 Arr3 Arrestin-C (COMP); ENSMUSG00000060216 Arrb2 Beta-arrestin-2 (COMP); ENSMUSG00000018909 Arrb1 Beta-arrestin-1 (COMP)
CG1406	U2A	PAIN	FBgn0033210	U2A U2A nuclear mRNA splicing, via spliceosome,mitotic spindle organization and biogenesis	ENSG00000131876 SNRPA1 U2 small nuclear ribonucleoprotein A' (HOMG_2325, I)	ENSG00000144158 Q9NU36_HUMAN BA395L1412 (I, COMP, OMCL_OG2_72574); ENSG00000131876 SNRPA1 U2 small nuclear ribonucleoprotein A' (COMP, OMCL_OG2_72574)	ENSMUSG00000030512 Snrpa1 U2 small nuclear ribonucleoprotein A' (HOMG_2325, COMP, I, OMCL_OG2_72574)	-	CG11278	Syx13	BP	FBgn0036341	Syx13 Syntaxin 13 cytokinesis after mitosis,male meiosis,intracellular protein transport,female meiosis,mitosis,vesicle-mediated transport,cytokinesis after meiosis I,synaptic vesicle docking during exocytosis,neurotransmitter secretion	-	ENSG00000079950 STX7 Syntaxin-7 (OMCL_OG2_71975); ENSG00000117758 STX12 Syntaxin-12 (OMCL_OG2_71975)	-	ENSMUSG00000019998 Stx7 Syntaxin-7 (OMCL_OG2_71975); ENSMUSG00000028879 Stx12 Syntaxin-12 (OMCL_OG2_71975)
CG14071	CG14071	BP	FBgn0032312	CG14071 CG14071	-	-	-	-	CG18332	CSN3	PAIN	FBgn0027055	CSN3 COP9 complex homolog subunit 3	ENSG00000141030 COPS3 COP9 signalosome complex subunit 3 (HOMG_2710, COMP, I, OMCL_OG2_74691)	-	ENSMUSG00000019373 Cops3 COP9 signalosome complex subunit 3 (HOMG_2710, COMP, I, OMCL_OG2_74691)	-
CG14071	CG14071	BP	FBgn0032312	CG14071 CG14071	-	-	-	-	CG5820	Gp150	PAIN	FBgn0013272	Gp150 Gp150 compound eye development,transmembrane receptor protein tyrosine phosphatase signaling pathway,metabolic process	-	-	-	-
CG14075	CG14075	PAIN	FBgn0036835	CG14075 CG14075	-	-	-	-	CG4087	RpLP1	BP	FBgn0002593	RpLP1 Ribosomal protein LP1 translational elongation,translation	ENSG00000137818 RPLP1 60S acidic ribosomal protein P1 (HOMG_37388, I)	ENSG00000182553 \N \N (I, OMCL_OG2_71052); ENSG00000137818 RPLP1 60S acidic ribosomal protein P1 (COMP, OMCL_OG2_71052); ENSG00000164906 (I); ENSG00000214657 \N \N (COMP)	ENSMUSG00000007892 Rplp1 60S acidic ribosomal protein P1 (HOMG_37388, I)	ENSMUSG00000007892 Rplp1 60S acidic ribosomal protein P1 (COMP, OMCL_OG2_71052); ENSMUSG00000063324 \N \N (I, COMP); ENSMUSG00000059634 \N \N (OMCL_OG2_71052); ENSMUSG00000060019 \N \N (OMCL_OG2_71052); MGI:3645889 EG621804 predicted gene, EG621804 (I); ENSMUSG00000075055 \N \N (OMCL_OG2_71052); MGI:3646958 EG383436 predicted gene, EG383436 (I); MGI:3645309 EG384325 predicted gene, EG384325 (I); …
CG14151	CG14151	BP	FBgn0036089	CG14151 CG14151	-	-	-	-	CG10800	Rca1	PAIN	FBgn0017551	Rca1 Regulator of cyclin A1 eye-antennal disc morphogenesis,compound eye morphogenesis,G2 phase of mitotic cell cycle,G1/S transition of mitotic cell cycle,regulation of mitosis,negative regulation of protein catabolic process	-	-	-	-
CG14151	CG14151	BP	FBgn0036089	CG14151 CG14151	-	-	-	-	CG4217	TFAM	PAIN	FBgn0038805	TFAM mitochondrial transcription factor A positive regulation of transcription, DNA-dependent,mitochondrial DNA replication,regulation of transcription	ENSG00000108064 TFAM Transcription factor A, mitochondrial precursor (OMCL_OG2_79568, I, HOMG_31139)	-	ENSMUSG00000003923 Tfam Transcription factor A, mitochondrial precursor (OMCL_OG2_79568, I, HOMG_31139)	-
CG1418	CG1418	BP	FBgn0033468	CG1418 CG1418	ENSG00000105404 RABAC1 Prenylated Rab acceptor protein 1 (OMCL_OG2_73640, COMP, I, HOMG_38182)	-	ENSMUSG00000003380 Rabac1 Prenylated Rab acceptor protein 1 (OMCL_OG2_73640, COMP, I, HOMG_38182)	-	CG9280	Glt	PAIN	FBgn0001114	Glt Glutactin	-	ENSG00000183077 AFMID Probable arylformamidase (OMCL_OG2_71930)	-	ENSMUSG00000017718 Afmid Probable arylformamidase (OMCL_OG2_71930)
CG1418	CG1418	BP	FBgn0033468	CG1418 CG1418	ENSG00000105404 RABAC1 Prenylated Rab acceptor protein 1 (OMCL_OG2_73640, COMP, I, HOMG_38182)	-	ENSMUSG00000003380 Rabac1 Prenylated Rab acceptor protein 1 (OMCL_OG2_73640, COMP, I, HOMG_38182)	-	CG2371	CG2371	PAIN	FBgn0030323	CG2371 CG2371	ENSG00000145781 COMMD10 COMM domain-containing protein 10 (OMCL_OG2_80120, COMP, I)	-	ENSMUSG00000042705 Commd10 COMM domain-containing protein 10 (OMCL_OG2_80120, COMP, I)	-
CG14216	CG14216	BP	FBgn0031054	CG14216 CG14216	ENSG00000160075 SSU72 Ssu72 RNA polymerase II CTD phosphatase homolog (OMCL_OG2_73662, HOMG_6754, I)	ENSG00000186232 \N \N (I, COMP); ENSG00000186223 \N \N (I, COMP); ENSG00000160075 SSU72 Ssu72 RNA polymerase II CTD phosphatase homolog (COMP); ENSG00000186217 NP_0010788641 similar to RIKEN cDNA 1500011L16 , mRNA (COMP)	ENSMUSG00000029038 Ssu72 Ssu72 RNA polymerase II CTD phosphatase homolog (OMCL_OG2_73662, HOMG_6754, COMP, I)	-	CG30404	Tango11	PAIN	FBgn0050404	Tango11 Transport and Golgi organization biological_process	ENSG00000168958 C2orf33 Uncharacterized protein C2orf33 (COMP, I)	-	ENSMUSG00000026150 5230400G24Rik Uncharacterized protein C2orf33 homolog (COMP, I)	MGI:3645666 EG628871 predicted gene, EG628871 (I)
CG14216	CG14216	BP	FBgn0031054	CG14216 CG14216	ENSG00000160075 SSU72 Ssu72 RNA polymerase II CTD phosphatase homolog (OMCL_OG2_73662, HOMG_6754, I)	ENSG00000186232 \N \N (I, COMP); ENSG00000186223 \N \N (I, COMP); ENSG00000160075 SSU72 Ssu72 RNA polymerase II CTD phosphatase homolog (COMP); ENSG00000186217 NP_0010788641 similar to RIKEN cDNA 1500011L16 , mRNA (COMP)	ENSMUSG00000029038 Ssu72 Ssu72 RNA polymerase II CTD phosphatase homolog (OMCL_OG2_73662, HOMG_6754, COMP, I)	-	CG2158	CG2158	PAIN	FBgn0033264	CG2158 CG2158 phagocytosis, engulfment,intracellular transport	ENSG00000093000 NUP50 Nucleoporin 50 kDa (HOMG_5190, COMP, I)	ENSG00000189235 \N \N (I, OMCL_OG2_76535); ENSG00000093000 NUP50 Nucleoporin 50 kDa (OMCL_OG2_76535)	ENSMUSG00000016619 Nup50 Nucleoporin 50 kDa (HOMG_5190, I, OMCL_OG2_76535)	ENSMUSG00000072878 1700123L14Rik RIKEN cDNA 1700123L14 gene on chromosome 6 (I, COMP); ENSMUSG00000016619 Nup50 Nucleoporin 50 kDa (COMP)
CG14216	CG14216	BP	FBgn0031054	CG14216 CG14216	ENSG00000160075 SSU72 Ssu72 RNA polymerase II CTD phosphatase homolog (OMCL_OG2_73662, HOMG_6754, I)	ENSG00000186232 \N \N (I, COMP); ENSG00000186223 \N \N (I, COMP); ENSG00000160075 SSU72 Ssu72 RNA polymerase II CTD phosphatase homolog (COMP); ENSG00000186217 NP_0010788641 similar to RIKEN cDNA 1500011L16 , mRNA (COMP)	ENSMUSG00000029038 Ssu72 Ssu72 RNA polymerase II CTD phosphatase homolog (OMCL_OG2_73662, HOMG_6754, COMP, I)	-	CG13096	CG13096	PAIN	FBgn0032050	CG13096 CG13096 translation	ENSG00000171490 RSL1D1 Ribosomal L1 domain-containing protein 1 (OMCL_OG2_72799, I)	-	ENSMUSG00000005846 Rsl1d1 ribosomal L1 domain containing 1 (OMCL_OG2_72799, I)	-
CG1422	p115	BP	FBgn0040087	p115 p115 intracellular protein transport,Golgi organization and biogenesis,vesicle fusion with Golgi apparatus,vesicle docking during exocytosis	ENSG00000138768 USO1 General vesicular transport factor p115 (HOMG_2754, COMP, I, OMCL_OG2_73942)	-	ENSMUSG00000029407 Uso1 General vesicular transport factor p115 (HOMG_2754, COMP, I, OMCL_OG2_73942)	-	CG18332	CSN3	PAIN	FBgn0027055	CSN3 COP9 complex homolog subunit 3	ENSG00000141030 COPS3 COP9 signalosome complex subunit 3 (HOMG_2710, COMP, I, OMCL_OG2_74691)	-	ENSMUSG00000019373 Cops3 COP9 signalosome complex subunit 3 (HOMG_2710, COMP, I, OMCL_OG2_74691)	-
CG14228	Mer	BP	FBgn0086384	Mer Merlin regulation of signal transduction,negative regulation of cell proliferation,endocytosis,regulation of cell differentiation,regulation of cell growth,axis specification,endocytic recycling,regulation of cell proliferation,pole plasm mRNA localization,cell-cell signaling,decapentaplegic receptor signaling pathway,compound eye photoreceptor cell differentiation,regulation of compound eye …	ENSG00000186575 NF2 Merlin (COMP, I, OMCL_OG2_78200, HOMG_2180)	-	ENSMUSG00000009073 Nf2 Merlin (COMP, I, OMCL_OG2_78200, HOMG_2180)	-	CG13096	CG13096	PAIN	FBgn0032050	CG13096 CG13096 translation	ENSG00000171490 RSL1D1 Ribosomal L1 domain-containing protein 1 (OMCL_OG2_72799, I)	-	ENSMUSG00000005846 Rsl1d1 ribosomal L1 domain containing 1 (OMCL_OG2_72799, I)	-
CG14228	Mer	BP	FBgn0086384	Mer Merlin regulation of signal transduction,negative regulation of cell proliferation,endocytosis,regulation of cell differentiation,regulation of cell growth,axis specification,endocytic recycling,regulation of cell proliferation,pole plasm mRNA localization,cell-cell signaling,decapentaplegic receptor signaling pathway,compound eye photoreceptor cell differentiation,regulation of compound eye …	ENSG00000186575 NF2 Merlin (COMP, I, OMCL_OG2_78200, HOMG_2180)	-	ENSMUSG00000009073 Nf2 Merlin (COMP, I, OMCL_OG2_78200, HOMG_2180)	-	CG6822	ergic53	PAIN	FBgn0035909	ergic53 ergic53	ENSG00000074695 LMAN1 ERGIC-53 protein precursor (OMCL_OG2_77235, HOMG_4070, I)	ENSG00000074695 LMAN1 ERGIC-53 protein precursor (COMP); ENSG00000140506 LMAN1L ERGIC-53-like protein precursor (COMP)	ENSMUSG00000041891 Lman1 Protein ERGIC-53 precursor (OMCL_OG2_77235, HOMG_4070, I)	ENSMUSG00000056271 Lman1l Protein ERGIC-53-like precursor (COMP); ENSMUSG00000041891 Lman1 Protein ERGIC-53 precursor (COMP)
CG14228	Mer	BP	FBgn0086384	Mer Merlin regulation of signal transduction,negative regulation of cell proliferation,endocytosis,regulation of cell differentiation,regulation of cell growth,axis specification,endocytic recycling,regulation of cell proliferation,pole plasm mRNA localization,cell-cell signaling,decapentaplegic receptor signaling pathway,compound eye photoreceptor cell differentiation,regulation of compound eye …	ENSG00000186575 NF2 Merlin (COMP, I, OMCL_OG2_78200, HOMG_2180)	-	ENSMUSG00000009073 Nf2 Merlin (COMP, I, OMCL_OG2_78200, HOMG_2180)	-	CG3711	CG3711	PAIN	FBgn0040344	CG3711 CG3711	ENSG00000099949 LZTR1 Leucine-zipper-like transcriptional regulator 1 (HOMG_4925, COMP, I, OMCL_OG2_73368)	-	ENSMUSG00000022761 Lztr1 Leucine-zipper-like transcriptional regulator 1 (HOMG_4925, COMP, I, OMCL_OG2_73368)	-
CG14228	Mer	BP	FBgn0086384	Mer Merlin regulation of signal transduction,negative regulation of cell proliferation,endocytosis,regulation of cell differentiation,regulation of cell growth,axis specification,endocytic recycling,regulation of cell proliferation,pole plasm mRNA localization,cell-cell signaling,decapentaplegic receptor signaling pathway,compound eye photoreceptor cell differentiation,regulation of compound eye …	ENSG00000186575 NF2 Merlin (COMP, I, OMCL_OG2_78200, HOMG_2180)	-	ENSMUSG00000009073 Nf2 Merlin (COMP, I, OMCL_OG2_78200, HOMG_2180)	-	CG11280	trn	PAIN	FBgn0010452	trn tartan open tracheal system development,cell migration,cell adhesion,branch fusion, open tracheal system	ENSG00000143365 RORC Nuclear receptor ROR-gamma (HOMG_18563)	ENSG00000173114 LRRN3 Leucine-rich repeat neuronal protein 3 precursor (I); ENSG00000170382 LRRN2 Leucine-rich repeat neuronal protein 5 precursor (I); ENSG00000175928 LRRN1 Leucine-rich repeat neuronal protein 1 precursor (I)	ENSMUSG00000036295 Lrrn3 Leucine-rich repeat neuronal protein 3 precursor (I); ENSMUSG00000044505 Lingo4 leucine rich repeat and Ig domain containing 4 (HOMG_18563); ENSMUSG00000026443 Lrrn2 leucine rich repeat protein 2, neuronal (I)	ENSMUSG00000034648 Lrrn1 Leucine-rich repeat neuronal protein 1 precursor (I)
CG14228	Mer	BP	FBgn0086384	Mer Merlin regulation of signal transduction,negative regulation of cell proliferation,endocytosis,regulation of cell differentiation,regulation of cell growth,axis specification,endocytic recycling,regulation of cell proliferation,pole plasm mRNA localization,cell-cell signaling,decapentaplegic receptor signaling pathway,compound eye photoreceptor cell differentiation,regulation of compound eye …	ENSG00000186575 NF2 Merlin (COMP, I, OMCL_OG2_78200, HOMG_2180)	-	ENSMUSG00000009073 Nf2 Merlin (COMP, I, OMCL_OG2_78200, HOMG_2180)	-	CG10033	Dmel_CG10033	PAIN	FBgn0000721	for foraging larval locomotory behavior,protein amino acid phosphorylation,regulation of heart contraction,larval feeding behavior,feeding behavior	ENSG00000185532 PRKG1 cGMP-dependent protein kinase 1, beta isozyme (COMP, I)	ENSG00000185532 PRKG1 cGMP-dependent protein kinase 1, beta isozyme (OMCL_OG2_71230); ENSG00000138669 PRKG2 cGMP-dependent protein kinase 2 (OMCL_OG2_71230)	ENSMUSG00000052920 Prkg1 cGMP-dependent protein kinase 1, alpha isozyme (COMP, I)	ENSMUSG00000052920 Prkg1 cGMP-dependent protein kinase 1, alpha isozyme (OMCL_OG2_71230); ENSMUSG00000029334 Prkg2 cGMP-dependent protein kinase 2 (OMCL_OG2_71230)
CG14351	CG14351	PAIN	FBgn0031349	CG14351 CG14351	-	-	-	-	CG8155	CG8155	BP	FBgn0034009	CG8155 CG8155 regulation of Rab GTPase activity	ENSG00000068354 TBC1D25 TBC1 domain family member 25 (HOMG_16173, COMP, OMCL_OG2_79804, I)	-	ENSMUSG00000039201 Tbc1d25 TBC1 domain family member 25 (HOMG_16173, COMP, I, OMCL_OG2_79804)	-
CG14374	CG14374	PAIN	FBgn0040553	CG14374 CG14374	-	-	-	-	CG10209	CG10209	BP	FBgn0033971	CG10209 CG10209	-	-	-	-
CG14410	CG14410	BP	FBgn0030583	CG14410 CG14410	-	-	-	-	CG13047	CG13047	PAIN	FBgn0036594	CG13047 CG13047	-	-	-	-
CG14410	CG14410	BP	FBgn0030583	CG14410 CG14410	-	-	-	-	CG10540	cpa	PAIN	FBgn0034577	cpa capping protein alpha barbed-end actin filament capping,phagocytosis, engulfment,microtubule-based movement,actin filament organization,wing disc development,actin cytoskeleton organization and biogenesis,negative regulation of actin filament polymerization	ENSG00000116489 CAPZA1 F-actin capping protein subunit alpha-1 (I, HOMG_24376)	ENSG00000198898 CAPZA2 F-actin capping protein subunit alpha-2 (I, COMP, OMCL_OG2_72873); ENSG00000116489 CAPZA1 F-actin capping protein subunit alpha-1 (COMP, OMCL_OG2_72873); ENSG00000177938 CAPZA3 F-actin capping protein subunit alpha-3 (COMP)	ENSMUSG00000070372 Capza1 F-actin-capping protein subunit alpha-1 (I)	ENSMUSG00000015733 Capza2 F-actin-capping protein subunit alpha-2 (I, COMP, OMCL_OG2_72873); ENSMUSG00000074348 (OMCL_OG2_72873, HOMG_24376); ENSMUSG00000055357 4933400A11Rik RIKEN cDNA 4933400A11 gene on chromosome X (I, COMP); ENSMUSG00000070372 Capza1 F-actin-capping protein subunit alpha-1 (COMP); 100041985 LOC100041985 (HOMG_24376); ENSMUSG00000041791 Capza3 F-actin-capping protein subunit a…
CG14442	CG14442	PAIN	FBgn0029893	CG14442 CG14442 transport	-	ENSG00000102984 NP_0600001 \N (COMP)	-	ENSMUSG00000031728 Zfp821 zinc finger protein 821 (COMP)	CG12306	polo	BP	FBgn0003124	polo polo pronuclear migration,negative regulation of neuroblast proliferation,phagocytosis, engulfment,sperm aster formation,spindle assembly involved in female meiosis II,female meiosis,mitotic spindle organization and biogenesis,male meiosis chromosome segregation,cytokinesis,male meiosis,pronuclear fusion,mitosis,protein amino acid phosphorylation,protein localization,cell cycle,female meiosi…	ENSG00000166851 PLK1 Serine/threonine-protein kinase PLK1 (COMP, I, HOMG_3690)	ENSG00000166851 PLK1 Serine/threonine-protein kinase PLK1 (OMCL_OG2_71994); ENSG00000145632 PLK2 Serine/threonine-protein kinase PLK2 (OMCL_OG2_71994); ENSG00000173846 PLK3 Serine/threonine-protein kinase PLK3 (OMCL_OG2_71994)	ENSMUSG00000030867 Plk1 Serine/threonine-protein kinase PLK1 (COMP, I, HOMG_3690)	ENSMUSG00000021701 Plk2 Serine/threonine-protein kinase PLK2 (OMCL_OG2_71994); ENSMUSG00000028680 Plk3 Serine/threonine-protein kinase PLK3 (OMCL_OG2_71994); ENSMUSG00000030867 Plk1 Serine/threonine-protein kinase PLK1 (OMCL_OG2_71994)
CG14442	CG14442	PAIN	FBgn0029893	CG14442 CG14442 transport	-	ENSG00000102984 NP_0600001 \N (COMP)	-	ENSMUSG00000031728 Zfp821 zinc finger protein 821 (COMP)	CG7238	sip1	BP	FBgn0024191	sip1 septin interacting protein 1	ENSG00000100109 TFIP11 Tuftelin-interacting protein 11 (COMP, OMCL_OG2_74132, I, HOMG_40813)	-	ENSMUSG00000029345 Tfip11 Tuftelin-interacting protein 11 (COMP, OMCL_OG2_74132, I, HOMG_40813)	-
CG14442	CG14442	PAIN	FBgn0029893	CG14442 CG14442 transport	-	ENSG00000102984 NP_0600001 \N (COMP)	-	ENSMUSG00000031728 Zfp821 zinc finger protein 821 (COMP)	CG10206	nop5	BP	FBgn0026196	nop5 nop5 rRNA processing	ENSG00000055044 NOL5_HUMAN Nucleolar protein 5 (HOMG_7024, COMP, I, OMCL_OG2_71634)	-	ENSMUSG00000026020 Nol5 Nucleolar protein 5 (HOMG_7024, COMP, I, OMCL_OG2_71634)	-
CG14442	CG14442	PAIN	FBgn0029893	CG14442 CG14442 transport	-	ENSG00000102984 NP_0600001 \N (COMP)	-	ENSMUSG00000031728 Zfp821 zinc finger protein 821 (COMP)	CG15218	CycK	BP	FBgn0025674	CycK Cyclin K	ENSG00000090061 CCNK Cyclin-K (OMCL_OG2_74234, COMP, I)	-	ENSMUSG00000021258 Ccnk Cyclin-K (OMCL_OG2_74234, COMP, I)	-
CG14442	CG14442	PAIN	FBgn0029893	CG14442 CG14442 transport	-	ENSG00000102984 NP_0600001 \N (COMP)	-	ENSMUSG00000031728 Zfp821 zinc finger protein 821 (COMP)	CG1422	p115	BP	FBgn0040087	p115 p115 intracellular protein transport,Golgi organization and biogenesis,vesicle fusion with Golgi apparatus,vesicle docking during exocytosis	ENSG00000138768 USO1 General vesicular transport factor p115 (HOMG_2754, COMP, I, OMCL_OG2_73942)	-	ENSMUSG00000029407 Uso1 General vesicular transport factor p115 (HOMG_2754, COMP, I, OMCL_OG2_73942)	-
CG14514	Brd8	PAIN	FBgn0039654	Brd8 Brd8	ENSG00000112983 BRD8 Bromodomain-containing protein 8 (HOMG_41790, OMCL_OG2_77200, COMP, I)	-	ENSMUSG00000003778 Brd8 Bromodomain-containing protein 8 (OMCL_OG2_77200, COMP, I)	-	CG9083	CG9083	BP	FBgn0035077	CG9083 CG9083	-	-	-	-
CG14514	Brd8	PAIN	FBgn0039654	Brd8 Brd8	ENSG00000112983 BRD8 Bromodomain-containing protein 8 (HOMG_41790, OMCL_OG2_77200, COMP, I)	-	ENSMUSG00000003778 Brd8 Bromodomain-containing protein 8 (OMCL_OG2_77200, COMP, I)	-	CG1422	p115	BP	FBgn0040087	p115 p115 intracellular protein transport,Golgi organization and biogenesis,vesicle fusion with Golgi apparatus,vesicle docking during exocytosis	ENSG00000138768 USO1 General vesicular transport factor p115 (HOMG_2754, COMP, I, OMCL_OG2_73942)	-	ENSMUSG00000029407 Uso1 General vesicular transport factor p115 (HOMG_2754, COMP, I, OMCL_OG2_73942)	-
CG14514	Brd8	PAIN	FBgn0039654	Brd8 Brd8	ENSG00000112983 BRD8 Bromodomain-containing protein 8 (HOMG_41790, OMCL_OG2_77200, COMP, I)	-	ENSMUSG00000003778 Brd8 Bromodomain-containing protein 8 (OMCL_OG2_77200, COMP, I)	-	CG9426	CG9426	BP	FBgn0032485	CG9426 CG9426 cytoplasmic sequestering of transcription factor	ENSG00000197429 IPP Actin-binding protein IPP (I, OMCL_OG2_80295, HOMG_4309)	-	ENSMUSG00000028696 Ipp Actin-binding protein IPP (I, OMCL_OG2_80295, HOMG_4309)	-
CG14549	Sld5	BP	FBgn0039403	Sld5 Sld5 positive regulation of S phase of mitotic cell cycle	ENSG00000147536 GINS4 SLD5 (OMCL_OG2_73554, HOMG_5759, COMP, I)	-	ENSMUSG00000031546 Gins4 SLD5 (OMCL_OG2_73554, HOMG_5759, COMP, I)	-	CG3949	hoip	PAIN	FBgn0015393	hoip hoi-polloi nuclear mRNA splicing, via spliceosome,ribosome biogenesis and assembly,peripheral nervous system development,nervous system development	ENSG00000100138 NHP2L1 NHP2-like protein 1 (OMCL_OG2_71588, HOMG_3672, COMP, I)	-	ENSMUSG00000063543 Nhp2l1 NHP2-like protein 1 (I); MGI:3646416 EG434401 predicted gene, EG434401 (I); 100040177 LOC100040177 (HOMG_3672); ENSMUSG00000063480 Nhp2l1 NHP2-like protein 1 (I)	ENSMUSG00000063480 Nhp2l1 NHP2-like protein 1 (OMCL_OG2_71588, COMP); ENSMUSG00000063543 Nhp2l1 NHP2-like protein 1 (COMP); ENSMUSG00000057294 \N \N (OMCL_OG2_71588); MGI:3644779 EG667636 predicted gene, EG667636 (I); MGI:893586 Nhp2l1 NHP2 non-histone chromosome protein 2-like 1 S. cerevisiae (I)
CG14549	Sld5	BP	FBgn0039403	Sld5 Sld5 positive regulation of S phase of mitotic cell cycle	ENSG00000147536 GINS4 SLD5 (OMCL_OG2_73554, HOMG_5759, COMP, I)	-	ENSMUSG00000031546 Gins4 SLD5 (OMCL_OG2_73554, HOMG_5759, COMP, I)	-	CG4550	ninaE	PAIN	FBgn0002940	ninaE neither inactivation nor afterpotential E phototransduction,G-protein coupled receptor protein signaling pathway,rhabdomere development,negative regulation of compound eye retinal cell programmed cell death,response to light intensity,adult locomotory behavior,photoreceptor cell morphogenesis	-	ENSG00000122375 OPN4 Melanopsin (OMCL_OG2_75321, I, COMP)	-	ENSMUSG00000021799 Opn4 Melanopsin (OMCL_OG2_75321, I, COMP)
CG14641	CG14641	BP	FBgn0037220	CG14641 CG14641 regulation of alternative nuclear mRNA splicing, via spliceosome	ENSG00000086589 RBM22 Pre-mRNA-splicing factor RBM22 (OMCL_OG2_72556, HOMG_69245, COMP, I)	-	ENSMUSG00000024604 Rbm22 Pre-mRNA-splicing factor RBM22 (OMCL_OG2_72556, HOMG_69245, COMP, I)	-	CG4550	ninaE	PAIN	FBgn0002940	ninaE neither inactivation nor afterpotential E phototransduction,G-protein coupled receptor protein signaling pathway,rhabdomere development,negative regulation of compound eye retinal cell programmed cell death,response to light intensity,adult locomotory behavior,photoreceptor cell morphogenesis	-	ENSG00000122375 OPN4 Melanopsin (OMCL_OG2_75321, I, COMP)	-	ENSMUSG00000021799 Opn4 Melanopsin (OMCL_OG2_75321, I, COMP)
CG1472	sec24	BP	FBgn0033460	sec24 sec24 intracellular protein transport,ER to Golgi vesicle-mediated transport	ENSG00000138802 SEC24B Protein transport protein Sec24B (HOMG_55968, I)	ENSG00000113615 SEC24A Protein transport protein Sec24A (OMCL_OG2_71751, I, COMP); ENSG00000138802 SEC24B Protein transport protein Sec24B (OMCL_OG2_71751, COMP)	ENSMUSG00000001052 Sec24b SEC24 related gene family, member B (HOMG_55968, I)	ENSMUSG00000036391 Sec24a Protein transport protein Sec24A (OMCL_OG2_71751, I, COMP); ENSMUSG00000001052 Sec24b SEC24 related gene family, member B (OMCL_OG2_71751, COMP)	CG1725	dlg1	PAIN	FBgn0001624	dlg1 discs large 1 morphogenesis of follicular epithelium,negative regulation of cell proliferation,establishment and/or maintenance of neuroblast polarity,septate junction assembly,basal protein localization,morphogenesis of a polarized epithelium,neuron differentiation,establishment and/or maintenance of polarity of embryonic epithelium,morphogenesis of an epithelium,establishment and/or mainte…	ENSG00000075711 DLG1 Disks large homolog 1 (I, HOMG_20869)	ENSG00000082458 DLG3 Discs large homolog 3 (I, OMCL_OG2_73729); ENSG00000132535 DLG4 Discs large homolog 4 (I, OMCL_OG2_73729); ENSG00000150672 DLG2 Discs large homolog 2 (I, OMCL_OG2_73729); ENSG00000075711 DLG1 Disks large homolog 1 (OMCL_OG2_73729)	ENSMUSG00000022770 Dlg1 Disks large homolog 1 (I, HOMG_20869)	ENSMUSG00000052572 Dlg2 Disks large homolog 2 (I, OMCL_OG2_73729); ENSMUSG00000020886 Dlg4 Disks large homolog 4 (I, OMCL_OG2_73729); ENSMUSG00000000881 Dlg3 Disks large homolog 3 (I, OMCL_OG2_73729); ENSMUSG00000022770 Dlg1 Disks large homolog 1 (OMCL_OG2_73729)
CG1472	sec24	BP	FBgn0033460	sec24 sec24 intracellular protein transport,ER to Golgi vesicle-mediated transport	ENSG00000138802 SEC24B Protein transport protein Sec24B (HOMG_55968, I)	ENSG00000113615 SEC24A Protein transport protein Sec24A (OMCL_OG2_71751, I, COMP); ENSG00000138802 SEC24B Protein transport protein Sec24B (OMCL_OG2_71751, COMP)	ENSMUSG00000001052 Sec24b SEC24 related gene family, member B (HOMG_55968, I)	ENSMUSG00000036391 Sec24a Protein transport protein Sec24A (OMCL_OG2_71751, I, COMP); ENSMUSG00000001052 Sec24b SEC24 related gene family, member B (OMCL_OG2_71751, COMP)	CG4550	ninaE	PAIN	FBgn0002940	ninaE neither inactivation nor afterpotential E phototransduction,G-protein coupled receptor protein signaling pathway,rhabdomere development,negative regulation of compound eye retinal cell programmed cell death,response to light intensity,adult locomotory behavior,photoreceptor cell morphogenesis	-	ENSG00000122375 OPN4 Melanopsin (OMCL_OG2_75321, I, COMP)	-	ENSMUSG00000021799 Opn4 Melanopsin (OMCL_OG2_75321, I, COMP)
CG14750	Vps25	PAIN	FBgn0022027	Vps25 Vacuolar protein sorting 25 cell differentiation,cell proliferation,endosome transport,regulation of apoptosis	ENSG00000131475 VPS25 Vacuolar protein sorting-associated protein 25 (HOMG_6303, OMCL_OG2_74267, COMP, I)	-	ENSMUSG00000078656 Vps25 Vacuolar protein-sorting-associated protein 25 (COMP, I); ENSMUSG00000060634 (HOMG_6303)	-	CG12470	CG12470	BP	FBgn0040371	CG12470 CG12470	-	-	-	-
CG14750	Vps25	PAIN	FBgn0022027	Vps25 Vacuolar protein sorting 25 cell differentiation,cell proliferation,endosome transport,regulation of apoptosis	ENSG00000131475 VPS25 Vacuolar protein sorting-associated protein 25 (HOMG_6303, OMCL_OG2_74267, COMP, I)	-	ENSMUSG00000078656 Vps25 Vacuolar protein-sorting-associated protein 25 (COMP, I); ENSMUSG00000060634 (HOMG_6303)	-	CG7001	Pk17E	BP	FBgn0004462	Pk17E Protein kinase-like 17E protein amino acid phosphorylation	ENSG00000167524 SG494_HUMAN Uncharacterized serine/threonine-protein kinase SgK494 (COMP)	-	ENSMUSG00000037593 BC030499 Uncharacterized serine/threonine-protein kinase SgK494 (COMP)	-
CG14818	CG14818	PAIN	FBgn0026088	CG14818 CG14818 biological_process	ENSG00000171159 C9orf16 UPF0184 protein C9orf16 (COMP, OMCL_OG2_81379)	-	ENSMUSG00000039195 1110008P14Rik UPF0184 protein C9orf16 homolog (COMP, OMCL_OG2_81379)	-	CG9951	CG9951	BP	FBgn0036671	CG9951 CG9951	ENSG00000101997 CCDC22 Coiled-coil domain-containing protein 22 (COMP, I, HOMG_8515, OMCL_OG2_78511)	-	ENSMUSG00000031143 Ccdc22 Coiled-coil domain-containing protein 22 (COMP, I, HOMG_8515, OMCL_OG2_78511)	-
CG14818	CG14818	PAIN	FBgn0026088	CG14818 CG14818 biological_process	ENSG00000171159 C9orf16 UPF0184 protein C9orf16 (COMP, OMCL_OG2_81379)	-	ENSMUSG00000039195 1110008P14Rik UPF0184 protein C9orf16 homolog (COMP, OMCL_OG2_81379)	-	CG15631	CG15631	BP	FBgn0031626	CG15631 CG15631	-	-	-	-
CG14818	CG14818	PAIN	FBgn0026088	CG14818 CG14818 biological_process	ENSG00000171159 C9orf16 UPF0184 protein C9orf16 (COMP, OMCL_OG2_81379)	-	ENSMUSG00000039195 1110008P14Rik UPF0184 protein C9orf16 homolog (COMP, OMCL_OG2_81379)	-	CG7357	CG7357	BP	FBgn0038551	CG7357 CG7357	-	-	-	-
CG14818	CG14818	PAIN	FBgn0026088	CG14818 CG14818 biological_process	ENSG00000171159 C9orf16 UPF0184 protein C9orf16 (COMP, OMCL_OG2_81379)	-	ENSMUSG00000039195 1110008P14Rik UPF0184 protein C9orf16 homolog (COMP, OMCL_OG2_81379)	-	CG33484	zormin	BP	FBgn0052311	zormin zormin	-	-	-	-
CG14904	Scp2	BP	FBgn0020907	Scp2 Sarcoplasmic calcium-binding protein 2	-	-	-	-	CG15071	CG15071	PAIN	FBgn0034377	CG15071 CG15071	-	-	-	-
CG14904	Scp2	BP	FBgn0020907	Scp2 Sarcoplasmic calcium-binding protein 2	-	-	-	-	CG5183	KdelR	PAIN	FBgn0022268	KdelR KDEL receptor retrograde vesicle-mediated transport, Golgi to ER,protein retention in ER,intra-Golgi vesicle-mediated transport	ENSG00000105438 KDELR1 ER lumen protein retaining receptor 1 (I); ENSG00000136240 KDELR2 ER lumen protein retaining receptor 2 (HOMG_38236)	ENSG00000136240 KDELR2 ER lumen protein retaining receptor 2 (OMCL_OG2_71280, I, COMP); ENSG00000100196 KDELR3 ER lumen protein retaining receptor 3 (OMCL_OG2_71280, COMP); ENSG00000105438 KDELR1 ER lumen protein retaining receptor 1 (OMCL_OG2_71280, COMP)	ENSMUSG00000002778 Kdelr1 ER lumen protein retaining receptor 1 (I); 66913 Kdelr2 (HOMG_38236)	ENSMUSG00000002778 Kdelr1 ER lumen protein retaining receptor 1 (OMCL_OG2_71280, COMP); ENSMUSG00000010830 Kdelr3 ER lumen protein retaining receptor 3 (OMCL_OG2_71280, COMP); ENSMUSG00000079111 Kdelr2 ER lumen protein retaining receptor 2 (I, COMP)
CG15010	ago	BP	FBgn0041171	ago archipelago regulation of exit from mitosis,negative regulation of growth,DNA endoreduplication,regulation of mitosis,cyclin catabolic process,regulation of proteolysis	ENSG00000109670 FBXW7 F-box/WD repeat protein 7 (HOMG_90941, OMCL_OG2_72752, COMP, I)	-	ENSMUSG00000028086 Fbxw7 F-box/WD repeat-containing protein 7 (HOMG_90941, OMCL_OG2_72752, COMP, I)	-	CG11081	plexA	PAIN	FBgn0025741	plexA plexin A axon midline choice point recognition,signal transduction,axon guidance,motor axon guidance	ENSG00000076356 PLXNA2 Plexin-A2 precursor (I); ENSG00000189437 PLXNA4B Plexin-A4 precursor (HOMG_77587)	ENSG00000189437 PLXNA4B Plexin-A4 precursor (OMCL_OG2_70932, I); ENSG00000130827 PLXNA3 Plexin-A3 precursor (OMCL_OG2_70932, I); ENSG00000114554 PLXNA1 Plexin-A1 precursor (OMCL_OG2_70932, I); ENSG00000004399 PLXND1 Plexin-D1 precursor (OMCL_OG2_70932); ENSG00000076356 PLXNA2 Plexin-A2 precursor (OMCL_OG2_70932); ENSG00000164050 PLXNB1 Plexin-B1 precursor (OMCL_OG2_70932); ENSG00000198753 PLXNB3 …	ENSMUSG00000029765 Plxna4 Plexin-A4 precursor (HOMG_77587); ENSMUSG00000026640 Plxna2 Plexin-A2 precursor (I)	ENSMUSG00000031398 Plxna3 plexin A3 (OMCL_OG2_70932, I); ENSMUSG00000030084 Plxna1 Plexin-A1 precursor (OMCL_OG2_70932, I); ENSMUSG00000029765 Plxna4 Plexin-A4 precursor (OMCL_OG2_70932, I); ENSMUSG00000031385 Plxnb3 Plexin-B3 precursor (OMCL_OG2_70932); ENSMUSG00000053646 Plxnb1 Plexin-B1 precursor (OMCL_OG2_70932); ENSMUSG00000030123 Plxnd1 plexin D1 (OMCL_OG2_70932); ENSMUSG00000036606 Plxnb2 …
CG15080	CG15080	BP	FBgn0034391	CG15080 CG15080	-	-	-	-	CG8487	garz	PAIN	FBgn0033714	garz gartenzwerg phagocytosis, engulfment,ER to Golgi vesicle-mediated transport,intra-Golgi vesicle-mediated transport,regulation of ARF protein signal transduction	ENSG00000107862 GBF1 Golgi-specific brefeldin A-resistance guanine nucleotide exchange factor 1 (HOMG_37897, COMP, I, OMCL_OG2_73056)	-	ENSMUSG00000025224 Gbf1 golgi-specific brefeldin A-resistance factor 1 (HOMG_37897, COMP, I, OMCL_OG2_73056)	-
CG15124	CG15124	BP	FBgn0034461	CG15124 CG15124	-	-	-	-	CG14818	CG14818	PAIN	FBgn0026088	CG14818 CG14818 biological_process	ENSG00000171159 C9orf16 UPF0184 protein C9orf16 (COMP, OMCL_OG2_81379)	-	ENSMUSG00000039195 1110008P14Rik UPF0184 protein C9orf16 homolog (COMP, OMCL_OG2_81379)	-
CG15124	CG15124	BP	FBgn0034461	CG15124 CG15124	-	-	-	-	CG8203	Cdk5	PAIN	FBgn0013762	Cdk5 Cyclin-dependent kinase 5 synaptic vesicle transport,protein amino acid phosphorylation,cell cycle,neurotransmitter secretion	ENSG00000164885 CDK5 Cell division protein kinase 5 (COMP, I); 1020 CDK5 (HOMG_3623)	ENSG00000170312 CDC2 Cell division control protein 2 homolog (OMCL_OG2_70889); ENSG00000164885 CDK5 Cell division protein kinase 5 (OMCL_OG2_70889); ENSG00000108504 CDK3 Cell division protein kinase 3 (OMCL_OG2_70889); ENSG00000123374 CDK2 Cell division protein kinase 2 (OMCL_OG2_70889)	ENSMUSG00000028969 Cdk5 Cell division protein kinase 5 (HOMG_3623, COMP, I)	ENSMUSG00000019942 Cdc2a Cell division control protein 2 homolog (OMCL_OG2_70889); ENSMUSG00000025358 Cdk2 Cell division protein kinase 2 (OMCL_OG2_70889); ENSMUSG00000034288 Cdk3 Cell division protein kinase 3 (OMCL_OG2_70889); ENSMUSG00000028969 Cdk5 Cell division protein kinase 5 (OMCL_OG2_70889)
CG15167	CG15167	PAIN	FBgn0032709	CG15167 CG15167	-	-	-	-	CG15631	CG15631	BP	FBgn0031626	CG15631 CG15631	-	-	-	-
CG15218	CycK	BP	FBgn0025674	CycK Cyclin K	ENSG00000090061 CCNK Cyclin-K (OMCL_OG2_74234, COMP, I)	-	ENSMUSG00000021258 Ccnk Cyclin-K (OMCL_OG2_74234, COMP, I)	-	CG4673	CG4673	PAIN	FBgn0039348	CG4673 CG4673	ENSG00000182446 NPLOC4 Nuclear protein localization protein 4 homolog (COMP, I, OMCL_OG2_72170); 55666 NPLOC4 (HOMG_5403)	-	ENSMUSG00000039703 Nploc4 Nuclear protein localization protein 4 homolog (HOMG_5403, COMP, I, OMCL_OG2_72170)	-
CG15218	CycK	BP	FBgn0025674	CycK Cyclin K	ENSG00000090061 CCNK Cyclin-K (OMCL_OG2_74234, COMP, I)	-	ENSMUSG00000021258 Ccnk Cyclin-K (OMCL_OG2_74234, COMP, I)	-	CG5473	SP2637	PAIN	FBgn0034371	SP2637 SP2637	ENSG00000157045 NTAN1 Protein N-terminal asparagine amidohydrolase (OMCL_OG2_78753, HOMG_7869, COMP, I)	-	ENSMUSG00000022681 Ntan1 Protein N-terminal asparagine amidohydrolase (OMCL_OG2_78753, HOMG_7869, COMP, I)	-
CG15319	nej	BP	FBgn0015624	nej nejire synaptogenesis,synaptic vesicle transport,smoothened signaling pathway,regulation of transcription, DNA-dependent,compound eye morphogenesis,R3/R4 cell fate commitment,Wnt receptor signaling pathway,hemopoiesis,regulation of mitosis,R7 cell differentiation,neurotransmitter secretion	ENSG00000100393 EP300 Histone acetyltransferase p300 (HOMG_1094, I)	ENSG00000005339 CREBBP CREB-binding protein (OMCL_OG2_72279, I); ENSG00000100393 EP300 Histone acetyltransferase p300 (OMCL_OG2_72279)	ENSMUSG00000055024 Ep300 E1A binding protein p300 (HOMG_1094, I)	ENSMUSG00000022521 Crebbp CREB-binding protein (OMCL_OG2_72279, I); MGI:1098280 Crebbp CREB binding protein (I); ENSMUSG00000055024 Ep300 E1A binding protein p300 (OMCL_OG2_72279)	CG4673	CG4673	PAIN	FBgn0039348	CG4673 CG4673	ENSG00000182446 NPLOC4 Nuclear protein localization protein 4 homolog (COMP, I, OMCL_OG2_72170); 55666 NPLOC4 (HOMG_5403)	-	ENSMUSG00000039703 Nploc4 Nuclear protein localization protein 4 homolog (HOMG_5403, COMP, I, OMCL_OG2_72170)	-
CG15319	nej	BP	FBgn0015624	nej nejire synaptogenesis,synaptic vesicle transport,smoothened signaling pathway,regulation of transcription, DNA-dependent,compound eye morphogenesis,R3/R4 cell fate commitment,Wnt receptor signaling pathway,hemopoiesis,regulation of mitosis,R7 cell differentiation,neurotransmitter secretion	ENSG00000100393 EP300 Histone acetyltransferase p300 (HOMG_1094, I)	ENSG00000005339 CREBBP CREB-binding protein (OMCL_OG2_72279, I); ENSG00000100393 EP300 Histone acetyltransferase p300 (OMCL_OG2_72279)	ENSMUSG00000055024 Ep300 E1A binding protein p300 (HOMG_1094, I)	ENSMUSG00000022521 Crebbp CREB-binding protein (OMCL_OG2_72279, I); MGI:1098280 Crebbp CREB binding protein (I); ENSMUSG00000055024 Ep300 E1A binding protein p300 (OMCL_OG2_72279)	CG5473	SP2637	PAIN	FBgn0034371	SP2637 SP2637	ENSG00000157045 NTAN1 Protein N-terminal asparagine amidohydrolase (OMCL_OG2_78753, HOMG_7869, COMP, I)	-	ENSMUSG00000022681 Ntan1 Protein N-terminal asparagine amidohydrolase (OMCL_OG2_78753, HOMG_7869, COMP, I)	-
CG15422	CG15422	BP	FBgn0031579	CG15422 CG15422 pathogenesis	-	-	-	-	CG1152	Gld	PAIN	FBgn0001112	Gld Glucose dehydrogenase sperm storage,pupal chitin-based cuticle development,alcohol metabolic process,glucose metabolic process,cuticle development	-	ENSG00000016391 CHDH Choline dehydrogenase, mitochondrial precursor (OMCL_OG2_70827, I, COMP)	-	ENSMUSG00000015970 Chdh Choline dehydrogenase, mitochondrial precursor (OMCL_OG2_70827, I, COMP)
CG15524	CG15524	BP	FBgn0039731	sas-6 spindle assembly abnormal 6 centrosome duplication,mitotic spindle organization and biogenesis	ENSG00000156876 SASS6 Spindle assembly abnormal protein 6 homolog (HOMG_45668, COMP, I, OMCL_OG2_74577)	-	ENSMUSG00000027959 Sass6 Spindle assembly abnormal protein 6 homolog (HOMG_45668, COMP, I, OMCL_OG2_74577)	-	CG14217	Tao-1	PAIN	FBgn0031030	Tao-1 Tao-1 protein amino acid phosphorylation	ENSG00000160551 TAOK1 Serine/threonine-protein kinase TAO1 (HOMG_27041, I)	ENSG00000135090 TAOK3 Serine/threonine-protein kinase TAO3 CTCL tumor (OMCL_OG2_73166, I, COMP); ENSG00000149930 TAOK2 Serine/threonine-protein kinase TAO2 (OMCL_OG2_73166, I, COMP); ENSG00000160551 TAOK1 Serine/threonine-protein kinase TAO1 (OMCL_OG2_73166, COMP)	ENSMUSG00000017291 Taok1 Serine/threonine-protein kinase TAO1 (HOMG_27041, I)	ENSMUSG00000059981 Taok2 Serine/threonine-protein kinase TAO2 (OMCL_OG2_73166, I, COMP); ENSMUSG00000061288 Taok3 Serine/threonine-protein kinase TAO3 (OMCL_OG2_73166, I, COMP); ENSMUSG00000017291 Taok1 Serine/threonine-protein kinase TAO1 (OMCL_OG2_73166, COMP)
CG15524	CG15524	BP	FBgn0039731	sas-6 spindle assembly abnormal 6 centrosome duplication,mitotic spindle organization and biogenesis	ENSG00000156876 SASS6 Spindle assembly abnormal protein 6 homolog (HOMG_45668, COMP, I, OMCL_OG2_74577)	-	ENSMUSG00000027959 Sass6 Spindle assembly abnormal protein 6 homolog (HOMG_45668, COMP, I, OMCL_OG2_74577)	-	CG4887	CG4887	PAIN	FBgn0031318	CG4887 CG4887	ENSG00000182872 RBM10 RNA-binding protein 10 (I, HOMG_31330); ENSG00000003756 RBM5 RNA-binding protein 5 (I)	ENSG00000003756 RBM5 RNA-binding protein 5 (COMP, OMCL_OG2_73880); ENSG00000182872 RBM10 RNA-binding protein 10 (COMP, OMCL_OG2_73880); ENSG00000004534 RBM6 RNA-binding protein 6 (COMP)	ENSMUSG00000031060 Rbm10 RNA binding motif protein 10 (I, HOMG_31330); ENSMUSG00000032580 Rbm5 RNA-binding protein 5 (I)	ENSMUSG00000032580 Rbm5 RNA-binding protein 5 (COMP, OMCL_OG2_73880); ENSMUSG00000031060 Rbm10 RNA binding motif protein 10 (COMP, OMCL_OG2_73880); ENSMUSG00000042188 \N \N (OMCL_OG2_73880); ENSMUSG00000032582 Rbm6 RNA binding motif protein 6 isoform b (COMP)
CG15580	CG15580	BP	FBgn0037398	CG15580 CG15580	-	ENSG00000146221 TCTE1 t-complex-associated testis expressed 1 (COMP)	-	ENSMUSG00000023949 Tcte1 t-complex-associated testis expressed 1 (COMP)	CG5134	MED9	PAIN	FBgn0034311	MED9 Mediator complex subunit 9	ENSG00000141026 MED9 mediator complex subunit 9 (COMP)	-	ENSMUSG00000061650 Med9 Mediator of RNA polymerase II transcription subunit 9 (COMP)	-
CG15764	CG15764	BP	FBgn0029817	CG15764 CG15764	-	-	-	-	CG6605	BicD	PAIN	FBgn0000183	BicD Bicaudal D cell differentiation,oocyte microtubule cytoskeleton polarization,intracellular mRNA localization,oocyte anterior/posterior axis determination,oocyte microtubule cytoskeleton organization,oocyte dorsal/ventral axis determination,mRNA transport,germarium-derived oocyte fate determination,oocyte nucleus migration during oocyte axis determination,signal transduction,germarium-derived…	ENSG00000151746 BICD1 Protein bicaudal D homolog 1 (I, HOMG_37518)	ENSG00000185963 BICD2 Protein bicaudal D homolog 2 (I, COMP, OMCL_OG2_74308); ENSG00000151746 BICD1 Protein bicaudal D homolog 1 (COMP, OMCL_OG2_74308)	ENSMUSG00000003452 Bicd1 Protein bicaudal D homolog 1 (I, HOMG_37518)	ENSMUSG00000037933 Bicd2 Protein bicaudal D homolog 2 (I, COMP, OMCL_OG2_74308); ENSMUSG00000003452 Bicd1 Protein bicaudal D homolog 1 (COMP, OMCL_OG2_74308)
CG15764	CG15764	BP	FBgn0029817	CG15764 CG15764	-	-	-	-	CG15071	CG15071	PAIN	FBgn0034377	CG15071 CG15071	-	-	-	-
CG15884	Cpr97Eb	PAIN	FBgn0039481	Cpr97Eb Cuticular protein 97Eb	-	-	-	-	CG3052	HLH4C	BP	FBgn0011277	HLH4C Helix loop helix protein 4C regulation of transcription	ENSG00000171786 NHLH1 Helix-loop-helix protein 1 (HOMG_4089, I)	ENSG00000177551 NHLH2 Helix-loop-helix protein 2 (OMCL_OG2_78258, I, COMP); ENSG00000171786 NHLH1 Helix-loop-helix protein 1 (OMCL_OG2_78258, COMP)	ENSMUSG00000051251 Nhlh1 Helix-loop-helix protein 1 (HOMG_4089, I); MGI:98481 Nhlh1 nescient helix loop helix 1 (I)	ENSMUSG00000048540 Nhlh2 Helix-loop-helix protein 2 (OMCL_OG2_78258, I, COMP); ENSMUSG00000051251 Nhlh1 Helix-loop-helix protein 1 (OMCL_OG2_78258, COMP)
CG15884	Cpr97Eb	PAIN	FBgn0039481	Cpr97Eb Cuticular protein 97Eb	-	-	-	-	CG12045	Cpr100A	BP	FBgn0039805	Cpr100A Cuticular protein 100A	-	-	-	-
CG15884	Cpr97Eb	PAIN	FBgn0039481	Cpr97Eb Cuticular protein 97Eb	-	-	-	-	CG17271	CG17271	BP	FBgn0038829	CG17271 CG17271	ENSG00000180398 MCFD2 Multiple coagulation factor deficiency protein 2 precursor (COMP, I, OMCL_OG2_79400)	ENSG00000146111 \N \N (I)	ENSMUSG00000024150 Mcfd2 Multiple coagulation factor deficiency protein 2 homolog precursor (COMP, I, OMCL_OG2_79400)	-
CG15884	Cpr97Eb	PAIN	FBgn0039481	Cpr97Eb Cuticular protein 97Eb	-	-	-	-	CG9083	CG9083	BP	FBgn0035077	CG9083 CG9083	-	-	-	-
CG15884	Cpr97Eb	PAIN	FBgn0039481	Cpr97Eb Cuticular protein 97Eb	-	-	-	-	CG9184	CG9184	BP	FBgn0035208	CG9184 CG9184	ENSG00000120306 C5orf32 Putative nuclear protein (COMP)	-	ENSMUSG00000046727 0610010O12Rik UPF0467 protein C5orf32 homolog (COMP)	-
CG15884	Cpr97Eb	PAIN	FBgn0039481	Cpr97Eb Cuticular protein 97Eb	-	-	-	-	CG9704	Nrt	BP	FBgn0004108	Nrt Neurotactin axonogenesis,central nervous system development,axonal fasciculation,axon guidance	-	-	-	-
CG15884	Cpr97Eb	PAIN	FBgn0039481	Cpr97Eb Cuticular protein 97Eb	-	-	-	-	CG8965	CG8965	BP	FBgn0031745	CG8965 CG8965 signal transduction	-	-	-	-
CG15884	Cpr97Eb	PAIN	FBgn0039481	Cpr97Eb Cuticular protein 97Eb	-	-	-	-	CG9036	Cpr56F	BP	FBgn0034499	Cpr56F Cuticular protein 56F	-	-	-	-
CG16725	Smn	PAIN	FBgn0036641	Smn survival motor neuron spliceosome assembly	ENSG00000205571 SMN_HUMAN Survival motor neuron protein (I); ENSG00000197929 (I); ENSG00000172062 SMN2 Survival motor neuron protein (I)	ENSG00000205571 SMN_HUMAN Survival motor neuron protein (OMCL_OG2_78320, COMP); ENSG00000172062 SMN2 Survival motor neuron protein (OMCL_OG2_78320, COMP); ENSG00000197929 (OMCL_OG2_78320)	ENSMUSG00000021645 Smn1 Survival motor neuron protein (OMCL_OG2_78320, COMP, I)	-	CG2199	CG2199	BP	FBgn0035213	CG2199 CG2199	-	-	-	-
CG16725	Smn	PAIN	FBgn0036641	Smn survival motor neuron spliceosome assembly	ENSG00000205571 SMN_HUMAN Survival motor neuron protein (I); ENSG00000197929 (I); ENSG00000172062 SMN2 Survival motor neuron protein (I)	ENSG00000205571 SMN_HUMAN Survival motor neuron protein (OMCL_OG2_78320, COMP); ENSG00000172062 SMN2 Survival motor neuron protein (OMCL_OG2_78320, COMP); ENSG00000197929 (OMCL_OG2_78320)	ENSMUSG00000021645 Smn1 Survival motor neuron protein (OMCL_OG2_78320, COMP, I)	-	CG6570	lbl	BP	FBgn0008651	lbl ladybird late regulation of cell fate specification,regulation of neuron differentiation,mesodermal cell fate specification,regulation of transcription, DNA-dependent,regulation of transcription,central nervous system development,heart development,muscle development	ENSG00000138136 LBX1 Transcription factor LBX1 (I)	ENSG00000138136 LBX1 Transcription factor LBX1 (OMCL_OG2_76834)	ENSMUSG00000025216 Lbx1 Transcription factor LBX1 (I)	ENSMUSG00000034968 Lbx2 Transcription factor LBX2 (I); ENSMUSG00000025216 Lbx1 Transcription factor LBX1 (OMCL_OG2_76834)
CG16725	Smn	PAIN	FBgn0036641	Smn survival motor neuron spliceosome assembly	ENSG00000205571 SMN_HUMAN Survival motor neuron protein (I); ENSG00000197929 (I); ENSG00000172062 SMN2 Survival motor neuron protein (I)	ENSG00000205571 SMN_HUMAN Survival motor neuron protein (OMCL_OG2_78320, COMP); ENSG00000172062 SMN2 Survival motor neuron protein (OMCL_OG2_78320, COMP); ENSG00000197929 (OMCL_OG2_78320)	ENSMUSG00000021645 Smn1 Survival motor neuron protein (OMCL_OG2_78320, COMP, I)	-	CG6539	Dhh1	BP	FBgn0011802	Dhh1 DEAD/DEAH RNA helicase 1	ENSG00000064703 DDX20 Probable ATP-dependent RNA helicase DDX20 (OMCL_OG2_76968, I)	-	ENSMUSG00000027905 Ddx20 Probable ATP-dependent RNA helicase DDX20 (OMCL_OG2_76968, I)	-
CG1676	cactin	BP	FBgn0031114	cactin cactin dorsal/ventral axis specification,signal transduction,defense response	ENSG00000105298 C19orf29 Uncharacterized protein C19orf29 (OMCL_OG2_72617, COMP, I); 58509 C19orf29 (HOMG_69553)	-	ENSMUSG00000034889 2510012J08Rik Uncharacterized protein C19orf29 homolog (OMCL_OG2_72617, COMP, I, HOMG_69553)	-	CG3213	CG3213	PAIN	FBgn0031545	CG3213 CG3213 translation	-	-	-	-
CG1676	cactin	BP	FBgn0031114	cactin cactin dorsal/ventral axis specification,signal transduction,defense response	ENSG00000105298 C19orf29 Uncharacterized protein C19orf29 (OMCL_OG2_72617, COMP, I); 58509 C19orf29 (HOMG_69553)	-	ENSMUSG00000034889 2510012J08Rik Uncharacterized protein C19orf29 homolog (OMCL_OG2_72617, COMP, I, HOMG_69553)	-	CG5643	wdb	PAIN	FBgn0027492	wdb widerborst signal transduction	ENSG00000154001 PPP2R5E Serine/threonine-protein phosphatase 2A 56 kDa regulatory subunit epsilon isoform (I, HOMG_55962)	ENSG00000066027 PPP2R5A Serine/threonine-protein phosphatase 2A 56 kDa regulatory subunit alpha isoform (I, COMP, OMCL_OG2_70981); ENSG00000068971 PPP2R5B Serine/threonine-protein phosphatase 2A 56 kDa regulatory subunit beta isoform (COMP, OMCL_OG2_70981); ENSG00000154001 PPP2R5E Serine/threonine-protein phosphatase 2A 56 kDa regulatory subunit epsilon isoform (COMP, OMCL_OG2_70981); ENSG0000011…	ENSMUSG00000021051 Ppp2r5e Serine/threonine-protein phosphatase 2A 56 kDa regulatory subunit epsilon isoform (I, HOMG_55962)	ENSMUSG00000026626 Ppp2r5a Serine/threonine-protein phosphatase 2A 56 kDa regulatory subunit alpha isoform (I, COMP, OMCL_OG2_70981); ENSMUSG00000021051 Ppp2r5e Serine/threonine-protein phosphatase 2A 56 kDa regulatory subunit epsilon isoform (COMP, OMCL_OG2_70981); ENSMUSG00000024777 Ppp2r5b protein phosphatase 2, regulatory subunit B , beta isoform (COMP, OMCL_OG2_70981); ENSMUSG00000017843 Ppp…
CG1676	cactin	BP	FBgn0031114	cactin cactin dorsal/ventral axis specification,signal transduction,defense response	ENSG00000105298 C19orf29 Uncharacterized protein C19orf29 (OMCL_OG2_72617, COMP, I); 58509 C19orf29 (HOMG_69553)	-	ENSMUSG00000034889 2510012J08Rik Uncharacterized protein C19orf29 homolog (OMCL_OG2_72617, COMP, I, HOMG_69553)	-	CG6340	CG6340	PAIN	FBgn0030648	CG6340 CG6340	ENSG00000111011 RSRC2 arginine/serine-rich coiled-coil 2 isoform b (HOMG_45198, I, OMCL_OG2_78978)	-	ENSMUSG00000029422 Rsrc2 Arginine/serine-rich coiled-coil protein 2 (HOMG_45198, I, OMCL_OG2_78978)	-
CG1676	cactin	BP	FBgn0031114	cactin cactin dorsal/ventral axis specification,signal transduction,defense response	ENSG00000105298 C19orf29 Uncharacterized protein C19orf29 (OMCL_OG2_72617, COMP, I); 58509 C19orf29 (HOMG_69553)	-	ENSMUSG00000034889 2510012J08Rik Uncharacterized protein C19orf29 homolog (OMCL_OG2_72617, COMP, I, HOMG_69553)	-	CG8849	mRpL24	PAIN	FBgn0031651	mRpL24 mitochondrial ribosomal protein L24 translation	ENSG00000143314 MRPL24 39S ribosomal protein L24, mitochondrial precursor (HOMG_12241, COMP, I, OMCL_OG2_71212)	-	ENSMUSG00000019710 Mrpl24 39S ribosomal protein L24, mitochondrial precursor (HOMG_12241, COMP, I, OMCL_OG2_71212)	-
CG16852	CG16852	PAIN	FBgn0028942	CG16852 CG16852	-	-	-	-	CG9949	sina	BP	FBgn0003410	sina seven in absentia proteolysis,R7 cell fate commitment,regulation of R7 cell differentiation,sensory organ development,ubiquitin-dependent protein catabolic process	ENSG00000181788 SIAH2 E3 ubiquitin-protein ligase SIAH2 (I, HOMG_21053)	ENSG00000181788 SIAH2 E3 ubiquitin-protein ligase SIAH2 (OMCL_OG2_74396, COMP); ENSG00000196470 SIAH1 E3 ubiquitin-protein ligase SIAH1 (OMCL_OG2_74396); ENSG00000215475 NP_9421462 similar to seven in absentia 2 , mRNA (COMP)	ENSMUSG00000036432 Siah2 E3 ubiquitin-protein ligase SIAH2 (COMP, HOMG_21053); MGI:108064 Siah1a seven in absentia 1A (I); ENSMUSG00000040749 Siah1b E3 ubiquitin-protein ligase SIAH1B (I)	ENSMUSG00000036432 Siah2 E3 ubiquitin-protein ligase SIAH2 (OMCL_OG2_74396, I); ENSMUSG00000040749 Siah1b E3 ubiquitin-protein ligase SIAH1B (OMCL_OG2_74396, I); ENSMUSG00000036840 Siah1a E3 ubiquitin-protein ligase SIAH1A (OMCL_OG2_74396, I)
CG16899	CG16899	PAIN	FBgn0037735	CG16899 CG16899 regulation of transcription, DNA-dependent	ENSG00000049768 FOXP3 Forkhead box protein P3 (I); ENSG00000114861 FOXP1 Forkhead box protein P1 (HOMG_13092)	ENSG00000128573 FOXP2 Forkhead box protein P2 (I, OMCL_OG2_74495); ENSG00000114861 FOXP1 Forkhead box protein P1 (I, OMCL_OG2_74495); ENSG00000137166 FOXP4 Forkhead box protein P4 (I, OMCL_OG2_74495)	ENSMUSG00000030067 Foxp1 Forkhead box protein P1 (HOMG_13092); ENSMUSG00000039521 Foxp3 Forkhead box protein P3 (I)	ENSMUSG00000030067 Foxp1 Forkhead box protein P1 (OMCL_OG2_74495); ENSMUSG00000023991 Foxp4 Forkhead box protein P4 (OMCL_OG2_74495); ENSMUSG00000029563 Foxp2 Forkhead box protein P2 (OMCL_OG2_74495)	CG5466	CG5466	BP	FBgn0038815	CG5466 CG5466 cellular process	-	-	-	-
CG16899	CG16899	PAIN	FBgn0037735	CG16899 CG16899 regulation of transcription, DNA-dependent	ENSG00000049768 FOXP3 Forkhead box protein P3 (I); ENSG00000114861 FOXP1 Forkhead box protein P1 (HOMG_13092)	ENSG00000128573 FOXP2 Forkhead box protein P2 (I, OMCL_OG2_74495); ENSG00000114861 FOXP1 Forkhead box protein P1 (I, OMCL_OG2_74495); ENSG00000137166 FOXP4 Forkhead box protein P4 (I, OMCL_OG2_74495)	ENSMUSG00000030067 Foxp1 Forkhead box protein P1 (HOMG_13092); ENSMUSG00000039521 Foxp3 Forkhead box protein P3 (I)	ENSMUSG00000030067 Foxp1 Forkhead box protein P1 (OMCL_OG2_74495); ENSMUSG00000023991 Foxp4 Forkhead box protein P4 (OMCL_OG2_74495); ENSMUSG00000029563 Foxp2 Forkhead box protein P2 (OMCL_OG2_74495)	CG7352	CG7352	BP	FBgn0037581	CG7352 CG7352	ENSG00000138587 MNS1 meiosis-specific nuclear structural 1 (OMCL_OG2_75133)	-	ENSMUSG00000032221 Mns1 Meiosis-specific nuclear structural protein 1 (I, OMCL_OG2_75133)	-
CG16899	CG16899	PAIN	FBgn0037735	CG16899 CG16899 regulation of transcription, DNA-dependent	ENSG00000049768 FOXP3 Forkhead box protein P3 (I); ENSG00000114861 FOXP1 Forkhead box protein P1 (HOMG_13092)	ENSG00000128573 FOXP2 Forkhead box protein P2 (I, OMCL_OG2_74495); ENSG00000114861 FOXP1 Forkhead box protein P1 (I, OMCL_OG2_74495); ENSG00000137166 FOXP4 Forkhead box protein P4 (I, OMCL_OG2_74495)	ENSMUSG00000030067 Foxp1 Forkhead box protein P1 (HOMG_13092); ENSMUSG00000039521 Foxp3 Forkhead box protein P3 (I)	ENSMUSG00000030067 Foxp1 Forkhead box protein P1 (OMCL_OG2_74495); ENSMUSG00000023991 Foxp4 Forkhead box protein P4 (OMCL_OG2_74495); ENSMUSG00000029563 Foxp2 Forkhead box protein P2 (OMCL_OG2_74495)	CG11092	CG11092	BP	FBgn0027537	CG11092 CG11092 transport	-	ENSG00000102900 NUP93 Nuclear pore complex protein Nup93 (OMCL_OG2_73884, I, COMP)	-	ENSMUSG00000032939 Nup93 Nuclear pore complex protein Nup93 (OMCL_OG2_73884, I, COMP)
CG16899	CG16899	PAIN	FBgn0037735	CG16899 CG16899 regulation of transcription, DNA-dependent	ENSG00000049768 FOXP3 Forkhead box protein P3 (I); ENSG00000114861 FOXP1 Forkhead box protein P1 (HOMG_13092)	ENSG00000128573 FOXP2 Forkhead box protein P2 (I, OMCL_OG2_74495); ENSG00000114861 FOXP1 Forkhead box protein P1 (I, OMCL_OG2_74495); ENSG00000137166 FOXP4 Forkhead box protein P4 (I, OMCL_OG2_74495)	ENSMUSG00000030067 Foxp1 Forkhead box protein P1 (HOMG_13092); ENSMUSG00000039521 Foxp3 Forkhead box protein P3 (I)	ENSMUSG00000030067 Foxp1 Forkhead box protein P1 (OMCL_OG2_74495); ENSMUSG00000023991 Foxp4 Forkhead box protein P4 (OMCL_OG2_74495); ENSMUSG00000029563 Foxp2 Forkhead box protein P2 (OMCL_OG2_74495)	CG31534	CG31534	BP	FBgn0051534	CG31534 CG31534	ENSG00000064042 LIMCH1 LIM and calponin homology domains 1 (OMCL_OG2_79863)	-	ENSMUSG00000037736 Limch1 LIM and calponin homology domains-containing protein 1 (OMCL_OG2_79863)	-
CG16899	CG16899	PAIN	FBgn0037735	CG16899 CG16899 regulation of transcription, DNA-dependent	ENSG00000049768 FOXP3 Forkhead box protein P3 (I); ENSG00000114861 FOXP1 Forkhead box protein P1 (HOMG_13092)	ENSG00000128573 FOXP2 Forkhead box protein P2 (I, OMCL_OG2_74495); ENSG00000114861 FOXP1 Forkhead box protein P1 (I, OMCL_OG2_74495); ENSG00000137166 FOXP4 Forkhead box protein P4 (I, OMCL_OG2_74495)	ENSMUSG00000030067 Foxp1 Forkhead box protein P1 (HOMG_13092); ENSMUSG00000039521 Foxp3 Forkhead box protein P3 (I)	ENSMUSG00000030067 Foxp1 Forkhead box protein P1 (OMCL_OG2_74495); ENSMUSG00000023991 Foxp4 Forkhead box protein P4 (OMCL_OG2_74495); ENSMUSG00000029563 Foxp2 Forkhead box protein P2 (OMCL_OG2_74495)	CG3225	CG3225	BP	FBgn0031631	CG3225 CG3225 nuclear mRNA splicing, via spliceosome	ENSG00000101452 DHX35 Probable ATP-dependent RNA helicase DHX35 (I, OMCL_OG2_75907, HOMG_6406)	-	ENSMUSG00000027655 Dhx35 DEAH box polypeptide 35 (I, OMCL_OG2_75907, HOMG_6406)	-
CG16899	CG16899	PAIN	FBgn0037735	CG16899 CG16899 regulation of transcription, DNA-dependent	ENSG00000049768 FOXP3 Forkhead box protein P3 (I); ENSG00000114861 FOXP1 Forkhead box protein P1 (HOMG_13092)	ENSG00000128573 FOXP2 Forkhead box protein P2 (I, OMCL_OG2_74495); ENSG00000114861 FOXP1 Forkhead box protein P1 (I, OMCL_OG2_74495); ENSG00000137166 FOXP4 Forkhead box protein P4 (I, OMCL_OG2_74495)	ENSMUSG00000030067 Foxp1 Forkhead box protein P1 (HOMG_13092); ENSMUSG00000039521 Foxp3 Forkhead box protein P3 (I)	ENSMUSG00000030067 Foxp1 Forkhead box protein P1 (OMCL_OG2_74495); ENSMUSG00000023991 Foxp4 Forkhead box protein P4 (OMCL_OG2_74495); ENSMUSG00000029563 Foxp2 Forkhead box protein P2 (OMCL_OG2_74495)	CG14540	CG14540	BP	FBgn0039398	CG14540 CG14540	-	-	-	-
CG16932	Eps-15	PAIN	FBgn0035060	Eps-15 Eps-15 vesicle-mediated transport,synaptic vesicle endocytosis,receptor-mediated endocytosis,neurotransmitter secretion	ENSG00000127527 EPS15L1 Epidermal growth factor receptor substrate 15-like 1 (I, HOMG_31881)	ENSG00000085832 EPS15 Epidermal growth factor receptor substrate 15 (OMCL_OG2_72738, I); ENSG00000127527 EPS15L1 Epidermal growth factor receptor substrate 15-like 1 (OMCL_OG2_72738)	ENSMUSG00000006276 Eps15l1 Epidermal growth factor receptor substrate 15-like 1 (I, HOMG_31881)	ENSMUSG00000028552 Eps15 Epidermal growth factor receptor substrate 15 (OMCL_OG2_72738, I); ENSMUSG00000006276 Eps15l1 Epidermal growth factor receptor substrate 15-like 1 (OMCL_OG2_72738)	CG7236	CG7236	BP	FBgn0031730	CG7236 CG7236 protein amino acid phosphorylation,cytokinesis	ENSG00000100490 CDKL1 Cyclin-dependent kinase-like 1 (HOMG_55805); ENSG00000205111 CDKL4 Cyclin-dependent kinase-like 4 (I)	ENSG00000138769 CDKL2 Cyclin-dependent kinase-like 2 (OMCL_OG2_72901); ENSG00000008086 CDKL5 Cyclin-dependent kinase-like 5 (OMCL_OG2_72901); ENSG00000205111 CDKL4 Cyclin-dependent kinase-like 4 (OMCL_OG2_72901)	ENSMUSG00000020990 Cdkl1 Cyclin-dependent kinase-like 1 (HOMG_55805, I)	ENSMUSG00000033966 Cdkl4 Cyclin-dependent kinase-like 4 (OMCL_OG2_72901, I); ENSMUSG00000029403 Cdkl2 Cyclin-dependent kinase-like 2 (OMCL_OG2_72901); ENSMUSG00000031292 Cdkl5 Cyclin-dependent kinase-like 5 (OMCL_OG2_72901); ENSMUSG00000020990 Cdkl1 Cyclin-dependent kinase-like 1 (OMCL_OG2_72901)
CG1697	rho-4	BP	FBgn0030318	rho-4 rhomboid-4 signal transduction	ENSG00000158315 RHBDL2 Rhomboid-related protein 2 (COMP, HOMG_49508)	-	ENSMUSG00000043333 Rhbdl2 rhomboid, veinlet-like 2 (COMP, HOMG_49508)	-	CG4550	ninaE	PAIN	FBgn0002940	ninaE neither inactivation nor afterpotential E phototransduction,G-protein coupled receptor protein signaling pathway,rhabdomere development,negative regulation of compound eye retinal cell programmed cell death,response to light intensity,adult locomotory behavior,photoreceptor cell morphogenesis	-	ENSG00000122375 OPN4 Melanopsin (OMCL_OG2_75321, I, COMP)	-	ENSMUSG00000021799 Opn4 Melanopsin (OMCL_OG2_75321, I, COMP)
CG1697	rho-4	BP	FBgn0030318	rho-4 rhomboid-4 signal transduction	ENSG00000158315 RHBDL2 Rhomboid-related protein 2 (COMP, HOMG_49508)	-	ENSMUSG00000043333 Rhbdl2 rhomboid, veinlet-like 2 (COMP, HOMG_49508)	-	CG11081	plexA	PAIN	FBgn0025741	plexA plexin A axon midline choice point recognition,signal transduction,axon guidance,motor axon guidance	ENSG00000076356 PLXNA2 Plexin-A2 precursor (I); ENSG00000189437 PLXNA4B Plexin-A4 precursor (HOMG_77587)	ENSG00000189437 PLXNA4B Plexin-A4 precursor (OMCL_OG2_70932, I); ENSG00000130827 PLXNA3 Plexin-A3 precursor (OMCL_OG2_70932, I); ENSG00000114554 PLXNA1 Plexin-A1 precursor (OMCL_OG2_70932, I); ENSG00000004399 PLXND1 Plexin-D1 precursor (OMCL_OG2_70932); ENSG00000076356 PLXNA2 Plexin-A2 precursor (OMCL_OG2_70932); ENSG00000164050 PLXNB1 Plexin-B1 precursor (OMCL_OG2_70932); ENSG00000198753 PLXNB3 …	ENSMUSG00000029765 Plxna4 Plexin-A4 precursor (HOMG_77587); ENSMUSG00000026640 Plxna2 Plexin-A2 precursor (I)	ENSMUSG00000031398 Plxna3 plexin A3 (OMCL_OG2_70932, I); ENSMUSG00000030084 Plxna1 Plexin-A1 precursor (OMCL_OG2_70932, I); ENSMUSG00000029765 Plxna4 Plexin-A4 precursor (OMCL_OG2_70932, I); ENSMUSG00000031385 Plxnb3 Plexin-B3 precursor (OMCL_OG2_70932); ENSMUSG00000053646 Plxnb1 Plexin-B1 precursor (OMCL_OG2_70932); ENSMUSG00000030123 Plxnd1 plexin D1 (OMCL_OG2_70932); ENSMUSG00000036606 Plxnb2 …
CG1709	Vha100-1	PAIN	FBgn0028671	Vha100-1 Vha100-1 proton transport	ENSG00000033627 ATP6V0A1 Vacuolar proton translocating ATPase 116 kDa subunit a isoform 1 (HOMG_3795, I)	ENSG00000105929 ATP6V0A4 Vacuolar proton translocating ATPase 116 kDa subunit a isoform 4 (COMP, I, OMCL_OG2_70772); ENSG00000033627 ATP6V0A1 Vacuolar proton translocating ATPase 116 kDa subunit a isoform 1 (COMP, OMCL_OG2_70772); ENSG00000185344 ATP6V0A2 Vacuolar proton translocating ATPase 116 kDa subunit a isoform 2 (COMP, OMCL_OG2_70772); ENSG00000110719 TCIRG1 Vacuolar proton translocating A…	ENSMUSG00000019302 Atp6v0a1 Vacuolar proton translocating ATPase 116 kDa subunit a isoform 1 (HOMG_3795, I)	ENSMUSG00000038600 Atp6v0a4 Vacuolar proton translocating ATPase 116 kDa subunit a isoform 4 (COMP, I, OMCL_OG2_70772); ENSMUSG00000038023 Atp6v0a2 Vacuolar proton translocating ATPase 116 kDa subunit a isoform 2 (COMP, OMCL_OG2_70772); ENSMUSG00000001750 Tcirg1 T-cell, immune regulator 1 (COMP, OMCL_OG2_70772); ENSMUSG00000019302 Atp6v0a1 Vacuolar proton translocating ATPase 116 kDa subunit a is…	CG1242	Hsp83	BP	FBgn0001233	Hsp83 Heat shock protein 83 regulation of cell shape,determination of anterior/posterior axis, embryo,centrosome cycle,protein folding,spermatogenesis,torso signaling pathway,R7 cell fate commitment,actin filament organization,response to heat,mitotic spindle organization and biogenesis,regulation of circadian sleep/wake cycle, sleep	ENSG00000080824 HSP90AA2 Heat shock protein HSP 90-alpha (HOMG_68464, I)	ENSG00000096384 HSP90AB1 Heat shock protein HSP 90-beta (OMCL_OG2_70698, I, COMP); ENSG00000205527 HSP90AB4P heat shock protein 90kDa alpha , class B member 4 on chromosome 15 (OMCL_OG2_70698, COMP); ENSG00000183199 Q58FF7_HUMAN Heat shock protein 90Bc (OMCL_OG2_70698, COMP); ENSG00000080824 HSP90AA2 Heat shock protein HSP 90-alpha (OMCL_OG2_70698, COMP); ENSG00000205141 HSP90B2P Heat shock prote…	ENSMUSG00000021270 Hsp90aa1 Heat shock protein HSP 90-alpha (HOMG_68464, I)	ENSMUSG00000023944 Hsp90ab1 Heat shock protein HSP 90-beta (OMCL_OG2_70698, I, COMP); ENSMUSG00000021270 Hsp90aa1 Heat shock protein HSP 90-alpha (OMCL_OG2_70698, COMP); ENSMUSG00000043566 (OMCL_OG2_70698); ENSMUSG00000020048 Hsp90b1 Endoplasmin precursor (OMCL_OG2_70698); ENSMUSG00000048570 (OMCL_OG2_70698)
CG1709	Vha100-1	PAIN	FBgn0028671	Vha100-1 Vha100-1 proton transport	ENSG00000033627 ATP6V0A1 Vacuolar proton translocating ATPase 116 kDa subunit a isoform 1 (HOMG_3795, I)	ENSG00000105929 ATP6V0A4 Vacuolar proton translocating ATPase 116 kDa subunit a isoform 4 (COMP, I, OMCL_OG2_70772); ENSG00000033627 ATP6V0A1 Vacuolar proton translocating ATPase 116 kDa subunit a isoform 1 (COMP, OMCL_OG2_70772); ENSG00000185344 ATP6V0A2 Vacuolar proton translocating ATPase 116 kDa subunit a isoform 2 (COMP, OMCL_OG2_70772); ENSG00000110719 TCIRG1 Vacuolar proton translocating A…	ENSMUSG00000019302 Atp6v0a1 Vacuolar proton translocating ATPase 116 kDa subunit a isoform 1 (HOMG_3795, I)	ENSMUSG00000038600 Atp6v0a4 Vacuolar proton translocating ATPase 116 kDa subunit a isoform 4 (COMP, I, OMCL_OG2_70772); ENSMUSG00000038023 Atp6v0a2 Vacuolar proton translocating ATPase 116 kDa subunit a isoform 2 (COMP, OMCL_OG2_70772); ENSMUSG00000001750 Tcirg1 T-cell, immune regulator 1 (COMP, OMCL_OG2_70772); ENSMUSG00000019302 Atp6v0a1 Vacuolar proton translocating ATPase 116 kDa subunit a is…	CG9083	CG9083	BP	FBgn0035077	CG9083 CG9083	-	-	-	-
CG17158	cpb	BP	FBgn0011570	cpb capping protein beta barbed-end actin filament capping,actin filament organization,wing disc development,actin cytoskeleton organization and biogenesis,regulation of actin filament length	ENSG00000077549 CAPZB F-actin capping protein subunit beta (COMP, I, HOMG_3620, OMCL_OG2_73243)	-	ENSMUSG00000028745 Capzb F-actin-capping protein subunit beta (COMP, I, HOMG_3620, OMCL_OG2_73243)	-	CG1847	CG1847	PAIN	FBgn0030345	CG1847 CG1847 protein folding	ENSG00000110711 AIP AH receptor-interacting protein (HOMG_2959, I)	ENSG00000129221 AIPL1 Aryl-hydrocarbon-interacting protein-like 1 (I, COMP, OMCL_OG2_74717); ENSG00000110711 AIP AH receptor-interacting protein (COMP, OMCL_OG2_74717)	ENSMUSG00000024847 Aip AH receptor-interacting protein (HOMG_2959, I)	ENSMUSG00000040554 Aipl1 Aryl-hydrocarbon-interacting protein-like 1 (I, COMP, OMCL_OG2_74717); ENSMUSG00000024847 Aip AH receptor-interacting protein (COMP, OMCL_OG2_74717)
CG17158	cpb	BP	FBgn0011570	cpb capping protein beta barbed-end actin filament capping,actin filament organization,wing disc development,actin cytoskeleton organization and biogenesis,regulation of actin filament length	ENSG00000077549 CAPZB F-actin capping protein subunit beta (COMP, I, HOMG_3620, OMCL_OG2_73243)	-	ENSMUSG00000028745 Capzb F-actin-capping protein subunit beta (COMP, I, HOMG_3620, OMCL_OG2_73243)	-	CG10540	cpa	PAIN	FBgn0034577	cpa capping protein alpha barbed-end actin filament capping,phagocytosis, engulfment,microtubule-based movement,actin filament organization,wing disc development,actin cytoskeleton organization and biogenesis,negative regulation of actin filament polymerization	ENSG00000116489 CAPZA1 F-actin capping protein subunit alpha-1 (I, HOMG_24376)	ENSG00000198898 CAPZA2 F-actin capping protein subunit alpha-2 (I, COMP, OMCL_OG2_72873); ENSG00000116489 CAPZA1 F-actin capping protein subunit alpha-1 (COMP, OMCL_OG2_72873); ENSG00000177938 CAPZA3 F-actin capping protein subunit alpha-3 (COMP)	ENSMUSG00000070372 Capza1 F-actin-capping protein subunit alpha-1 (I)	ENSMUSG00000015733 Capza2 F-actin-capping protein subunit alpha-2 (I, COMP, OMCL_OG2_72873); ENSMUSG00000074348 (OMCL_OG2_72873, HOMG_24376); ENSMUSG00000055357 4933400A11Rik RIKEN cDNA 4933400A11 gene on chromosome X (I, COMP); ENSMUSG00000070372 Capza1 F-actin-capping protein subunit alpha-1 (COMP); 100041985 LOC100041985 (HOMG_24376); ENSMUSG00000041791 Capza3 F-actin-capping protein subunit a…
CG1725	dlg1	PAIN	FBgn0001624	dlg1 discs large 1 morphogenesis of follicular epithelium,negative regulation of cell proliferation,establishment and/or maintenance of neuroblast polarity,septate junction assembly,basal protein localization,morphogenesis of a polarized epithelium,neuron differentiation,establishment and/or maintenance of polarity of embryonic epithelium,morphogenesis of an epithelium,establishment and/or mainte…	ENSG00000075711 DLG1 Disks large homolog 1 (I, HOMG_20869)	ENSG00000082458 DLG3 Discs large homolog 3 (I, OMCL_OG2_73729); ENSG00000132535 DLG4 Discs large homolog 4 (I, OMCL_OG2_73729); ENSG00000150672 DLG2 Discs large homolog 2 (I, OMCL_OG2_73729); ENSG00000075711 DLG1 Disks large homolog 1 (OMCL_OG2_73729)	ENSMUSG00000022770 Dlg1 Disks large homolog 1 (I, HOMG_20869)	ENSMUSG00000052572 Dlg2 Disks large homolog 2 (I, OMCL_OG2_73729); ENSMUSG00000020886 Dlg4 Disks large homolog 4 (I, OMCL_OG2_73729); ENSMUSG00000000881 Dlg3 Disks large homolog 3 (I, OMCL_OG2_73729); ENSMUSG00000022770 Dlg1 Disks large homolog 1 (OMCL_OG2_73729)	CG5410	Miro	BP	FBgn0039140	Miro Mitochondrial Rho cytoplasmic microtubule organization and biogenesis,mitochondrion transport along microtubule,small GTPase mediated signal transduction,cellular homeostasis,synaptic transmission,apoptosis	ENSG00000126858 RHOT1 Mitochondrial Rho GTPase 1 (HOMG_56803, I)	ENSG00000140983 RHOT2 Mitochondrial Rho GTPase 2 (I, COMP, OMCL_OG2_72706); ENSG00000126858 RHOT1 Mitochondrial Rho GTPase 1 (COMP, OMCL_OG2_72706)	ENSMUSG00000017686 Rhot1 Mitochondrial Rho GTPase 1 (HOMG_56803, I)	ENSMUSG00000025733 Rhot2 Mitochondrial Rho GTPase 2 (I, COMP, OMCL_OG2_72706); ENSMUSG00000017686 Rhot1 Mitochondrial Rho GTPase 1 (COMP, OMCL_OG2_72706)
CG17265	CG17265	BP	FBgn0031488	CG17265 CG17265 RNA interference	ENSG00000205476 \N \N (I, OMCL_OG2_78247)	ENSG00000055813 CCDC85A Coiled-coil domain-containing protein 85A (I, COMP); ENSG00000205476 \N \N (COMP); ENSG00000175602 CCDC85B Delta-interacting protein A (COMP)	ENSMUSG00000071162 (HOMG_82238, OMCL_OG2_78247); MGI:3644008 EG668158 predicted gene, EG668158 (I)	ENSMUSG00000032878 Ccdc85a Coiled-coil domain-containing protein 85A (I, COMP); ENSMUSG00000080191 \N \N (COMP)	CG7172	CG7172	PAIN	FBgn0037102	CG7172 CG7172	ENSG00000179271 GADD45GIP1 Growth arrest and DNA-damage-inducible proteins-interacting protein 1 (COMP, I, OMCL_OG2_78702)	-	ENSMUSG00000033751 Gadd45gip1 Growth arrest and DNA-damage-inducible proteins-interacting protein 1 (COMP, I, OMCL_OG2_78702)	-
CG17265	CG17265	BP	FBgn0031488	CG17265 CG17265 RNA interference	ENSG00000205476 \N \N (I, OMCL_OG2_78247)	ENSG00000055813 CCDC85A Coiled-coil domain-containing protein 85A (I, COMP); ENSG00000205476 \N \N (COMP); ENSG00000175602 CCDC85B Delta-interacting protein A (COMP)	ENSMUSG00000071162 (HOMG_82238, OMCL_OG2_78247); MGI:3644008 EG668158 predicted gene, EG668158 (I)	ENSMUSG00000032878 Ccdc85a Coiled-coil domain-containing protein 85A (I, COMP); ENSMUSG00000080191 \N \N (COMP)	CG3613	qkr58E-1	PAIN	FBgn0022986	qkr58E-1 quaking related 58E-1	ENSG00000112232 KHDRBS2 KH domain-containing, RNA-binding, signal transduction-associated protein 2 (HOMG_15772)	ENSG00000131773 KHDRBS3 KH domain-containing, RNA-binding, signal transduction-associated protein 3 (OMCL_OG2_77122, COMP, I); ENSG00000112232 KHDRBS2 KH domain-containing, RNA-binding, signal transduction-associated protein 2 (OMCL_OG2_77122, COMP, I); ENSG00000121774 KHDRBS1 KH domain-containing, RNA-binding, signal transduction-associated protein 1 (COMP, I)	ENSMUSG00000026058 Khdrbs2 KH domain-containing, RNA-binding, signal transduction-associated protein 2 (HOMG_15772)	ENSMUSG00000026058 Khdrbs2 KH domain-containing, RNA-binding, signal transduction-associated protein 2 (OMCL_OG2_77122, COMP, I); ENSMUSG00000022332 Khdrbs3 KH domain-containing, RNA-binding, signal transduction-associated protein 3 (OMCL_OG2_77122, COMP, I); ENSMUSG00000028790 Khdrbs1 KH domain-containing, RNA-binding, signal transduction-associated protein 1 (COMP, I)
CG17291	Pp2A-29B	BP	FBgn0005776	Pp2A-29B Protein phosphatase 2A at 29B phagocytosis, engulfment,protein amino acid dephosphorylation,mitotic spindle organization and biogenesis	ENSG00000105568 PPP2R1A Serine/threonine-protein phosphatase 2A 65 kDa regulatory subunit A alpha isoform (HOMG_68559, I)	ENSG00000137713 PPP2R1B Serine/threonine-protein phosphatase 2A 65 kDa regulatory subunit A beta isoform (OMCL_OG2_71713, I, COMP); ENSG00000105568 PPP2R1A Serine/threonine-protein phosphatase 2A 65 kDa regulatory subunit A alpha isoform (OMCL_OG2_71713, COMP)	ENSMUSG00000007564 Ppp2r1a Serine/threonine-protein phosphatase 2A 65 kDa regulatory subunit A alpha isoform (HOMG_68559, I)	ENSMUSG00000032058 Ppp2r1b Serine/threonine-protein phosphatase 2A 65 kDa regulatory subunit A beta isoform (OMCL_OG2_71713, I, COMP); ENSMUSG00000007564 Ppp2r1a Serine/threonine-protein phosphatase 2A 65 kDa regulatory subunit A alpha isoform (OMCL_OG2_71713, COMP)	CG18332	CSN3	PAIN	FBgn0027055	CSN3 COP9 complex homolog subunit 3	ENSG00000141030 COPS3 COP9 signalosome complex subunit 3 (HOMG_2710, COMP, I, OMCL_OG2_74691)	-	ENSMUSG00000019373 Cops3 COP9 signalosome complex subunit 3 (HOMG_2710, COMP, I, OMCL_OG2_74691)	-
CG17295	CG17295	PAIN	FBgn0032034	CG17295 CG17295	-	-	-	-	CG3114	ewg	BP	FBgn0005427	ewg erect wing central nervous system development,imaginal disc morphogenesis,muscle development	ENSG00000106459 NRF1 Nuclear respiratory factor 1 (OMCL_OG2_80522, COMP, I)	-	ENSMUSG00000058440 Nrf1 Nuclear respiratory factor 1 (OMCL_OG2_80522, COMP, I)	-
CG17295	CG17295	PAIN	FBgn0032034	CG17295 CG17295	-	-	-	-	CG14549	Sld5	BP	FBgn0039403	Sld5 Sld5 positive regulation of S phase of mitotic cell cycle	ENSG00000147536 GINS4 SLD5 (OMCL_OG2_73554, HOMG_5759, COMP, I)	-	ENSMUSG00000031546 Gins4 SLD5 (OMCL_OG2_73554, HOMG_5759, COMP, I)	-
CG17328	CG17328	BP	FBgn0028895	CG17328 CG17328	-	-	-	-	CG33106	mask	PAIN	FBgn0043884	mask multiple ankyrin repeats single KH domain cell proliferation,compound eye photoreceptor cell differentiation,transmembrane receptor protein tyrosine kinase signaling pathway,cytoskeletal anchoring,antimicrobial humoral response,cellular process	ENSG00000131503 ANKHD1-EIF4EBP3 Eukaryotic translation initiation factor 4E-binding protein 3 (I)	ENSG00000132466 ANKRD17 ankyrin repeat domain protein 17 isoform b (OMCL_OG2_75090, I); ENSG00000131503 ANKHD1-EIF4EBP3 Eukaryotic translation initiation factor 4E-binding protein 3 (OMCL_OG2_75090)	ENSMUSG00000024483 Eif4ebp3 Eukaryotic translation initiation factor 4E-binding protein 3 (I)	ENSMUSG00000055204 Ankrd17 Ankyrin repeat domain-containing protein 17 (OMCL_OG2_75090, I); ENSMUSG00000024483 Eif4ebp3 Eukaryotic translation initiation factor 4E-binding protein 3 (OMCL_OG2_75090)
CG17489	RpL5	BP	FBgn0064225	RpL5 Ribosomal protein L5 translation	ENSG00000122406 RPL5 60S ribosomal protein L5 (COMP, I, OMCL_OG2_71402)	ENSG00000183898 \N \N (I)	ENSMUSG00000058558 Rpl5 60S ribosomal protein L5 (COMP, I); ENSMUSG00000059478 (HOMG_90823)	MGI:3647110 EG665407 predicted gene, EG665407 (I); ENSMUSG00000059478 (OMCL_OG2_71402); ENSMUSG00000058558 Rpl5 60S ribosomal protein L5 (OMCL_OG2_71402); ENSMUSG00000062131 \N \N (OMCL_OG2_71402)	CG11586	CG11586	PAIN	FBgn0035520	CG11586 CG11586	ENSG00000146007 ZMAT2 Zinc finger matrin-type protein 2 (OMCL_OG2_72955, COMP, I, HOMG_5563)	-	ENSMUSG00000001383 Zmat2 Zinc finger matrin-type protein 2 (OMCL_OG2_72955, COMP, I, HOMG_5563)	-
CG17494	CG17494	BP	FBgn0040011	CG17494 CG17494	ENSG00000163681 SLMAP sarcolemma associated protein (HOMG_31428, OMCL_OG2_75073, I)	ENSG00000163681 SLMAP sarcolemma associated protein (COMP); ENSG00000009790 TRAF3IP3 TRAF3-interacting JNK-activating modulator (COMP)	ENSMUSG00000021870 Slmap Sarcolemmal membrane-associated protein (HOMG_31428, OMCL_OG2_75073, I)	ENSMUSG00000037318 Traf3ip3 TRAF3-interacting JNK-activating modulator (COMP); ENSMUSG00000021870 Slmap Sarcolemmal membrane-associated protein (COMP)	CG10158	CG10158	PAIN	FBgn0031871	CG10158 CG10158	ENSG00000111790 FGFR1OP2 FGFR1 oncogene partner 2 (HOMG_9222, I, OMCL_OG2_79835)	ENSG00000052723 NP_0793492 suppressor of IKK epsilon isoform 1 (I, COMP); ENSG00000111790 FGFR1OP2 FGFR1 oncogene partner 2 (COMP)	ENSMUSG00000040242 Fgfr1op2 FGFR1 oncogene partner 2 homolog (HOMG_9222, I, OMCL_OG2_79835)	ENSMUSG00000027854 5730470L24Rik Suppressor of IKK-epsilon protein A (I, COMP); ENSMUSG00000040242 Fgfr1op2 FGFR1 oncogene partner 2 homolog (COMP)
CG17494	CG17494	BP	FBgn0040011	CG17494 CG17494	ENSG00000163681 SLMAP sarcolemma associated protein (HOMG_31428, OMCL_OG2_75073, I)	ENSG00000163681 SLMAP sarcolemma associated protein (COMP); ENSG00000009790 TRAF3IP3 TRAF3-interacting JNK-activating modulator (COMP)	ENSMUSG00000021870 Slmap Sarcolemmal membrane-associated protein (HOMG_31428, OMCL_OG2_75073, I)	ENSMUSG00000037318 Traf3ip3 TRAF3-interacting JNK-activating modulator (COMP); ENSMUSG00000021870 Slmap Sarcolemmal membrane-associated protein (COMP)	CG1968	CG1968	PAIN	FBgn0033401	CG1968 CG1968	ENSG00000133103 COG6 Conserved oligomeric Golgi complex component 6 (HOMG_10802, COMP, I, OMCL_OG2_73745)	-	ENSMUSG00000027742 Cog6 Conserved oligomeric Golgi complex component 6 (HOMG_10802, COMP, I, OMCL_OG2_73745)	-
CG17520	CkIIalpha	BP	FBgn0000258	CkIIalpha Casein kinase II Î± subunit locomotor rhythm,bristle development,lateral inhibition,compound eye development,protein amino acid phosphorylation,Wnt receptor signaling pathway,circadian rhythm	ENSG00000101266 CSNK2A1P Casein kinase II subunit alpha (I, HOMG_90874)	ENSG00000070770 CSNK2A2 Casein kinase II subunit alpha' (OMCL_OG2_71273, COMP); ENSG00000101266 CSNK2A1P Casein kinase II subunit alpha (OMCL_OG2_71273, COMP)	ENSMUSG00000074698 Csnk2a1 Casein kinase II subunit alpha (I)	ENSMUSG00000046707 Csnk2a2 Casein kinase II subunit alpha' (OMCL_OG2_71273, COMP); ENSMUSG00000074698 Csnk2a1 Casein kinase II subunit alpha (OMCL_OG2_71273, COMP); ENSMUSG00000057808 \N \N (OMCL_OG2_71273)	CG8914	CkIIbeta2	PAIN	FBgn0026136	CkIIbeta2 Casein kinase II Î²2 subunit protein amino acid phosphorylation	-	ENSG00000206300 CSK2B_HUMAN Casein kinase II subunit beta (OMCL_OG2_71033); ENSG00000204435 LY6G5B Casein kinase II subunit beta (OMCL_OG2_71033); ENSG00000206406 CSNK2B Casein kinase II subunit beta (OMCL_OG2_71033)	-	ENSMUSG00000024387 Csnk2b Casein kinase II subunit beta (OMCL_OG2_71033)
CG17520	CkIIalpha	BP	FBgn0000258	CkIIalpha Casein kinase II Î± subunit locomotor rhythm,bristle development,lateral inhibition,compound eye development,protein amino acid phosphorylation,Wnt receptor signaling pathway,circadian rhythm	ENSG00000101266 CSNK2A1P Casein kinase II subunit alpha (I, HOMG_90874)	ENSG00000070770 CSNK2A2 Casein kinase II subunit alpha' (OMCL_OG2_71273, COMP); ENSG00000101266 CSNK2A1P Casein kinase II subunit alpha (OMCL_OG2_71273, COMP)	ENSMUSG00000074698 Csnk2a1 Casein kinase II subunit alpha (I)	ENSMUSG00000046707 Csnk2a2 Casein kinase II subunit alpha' (OMCL_OG2_71273, COMP); ENSMUSG00000074698 Csnk2a1 Casein kinase II subunit alpha (OMCL_OG2_71273, COMP); ENSMUSG00000057808 \N \N (OMCL_OG2_71273)	CG4887	CG4887	PAIN	FBgn0031318	CG4887 CG4887	ENSG00000182872 RBM10 RNA-binding protein 10 (I, HOMG_31330); ENSG00000003756 RBM5 RNA-binding protein 5 (I)	ENSG00000003756 RBM5 RNA-binding protein 5 (COMP, OMCL_OG2_73880); ENSG00000182872 RBM10 RNA-binding protein 10 (COMP, OMCL_OG2_73880); ENSG00000004534 RBM6 RNA-binding protein 6 (COMP)	ENSMUSG00000031060 Rbm10 RNA binding motif protein 10 (I, HOMG_31330); ENSMUSG00000032580 Rbm5 RNA-binding protein 5 (I)	ENSMUSG00000032580 Rbm5 RNA-binding protein 5 (COMP, OMCL_OG2_73880); ENSMUSG00000031060 Rbm10 RNA binding motif protein 10 (COMP, OMCL_OG2_73880); ENSMUSG00000042188 \N \N (OMCL_OG2_73880); ENSMUSG00000032582 Rbm6 RNA binding motif protein 6 isoform b (COMP)
CG17520	CkIIalpha	BP	FBgn0000258	CkIIalpha Casein kinase II Î± subunit locomotor rhythm,bristle development,lateral inhibition,compound eye development,protein amino acid phosphorylation,Wnt receptor signaling pathway,circadian rhythm	ENSG00000101266 CSNK2A1P Casein kinase II subunit alpha (I, HOMG_90874)	ENSG00000070770 CSNK2A2 Casein kinase II subunit alpha' (OMCL_OG2_71273, COMP); ENSG00000101266 CSNK2A1P Casein kinase II subunit alpha (OMCL_OG2_71273, COMP)	ENSMUSG00000074698 Csnk2a1 Casein kinase II subunit alpha (I)	ENSMUSG00000046707 Csnk2a2 Casein kinase II subunit alpha' (OMCL_OG2_71273, COMP); ENSMUSG00000074698 Csnk2a1 Casein kinase II subunit alpha (OMCL_OG2_71273, COMP); ENSMUSG00000057808 \N \N (OMCL_OG2_71273)	CG18350	Sxl	PAIN	FBgn0003659	Sxl Sex lethal female germ-line sex determination,germ cell development,regulation of nuclear mRNA splicing, via spliceosome,female sex differentiation,smoothened signaling pathway,sex determination, primary response to X:A ratio,female sex determination,alternative nuclear mRNA splicing, via spliceosome,negative regulation of nuclear mRNA splicing, via spliceosome,somatic sex determination,dosag…	-	-	-	-
CG17568	CG17568	BP	FBgn0032763	CG17568 CG17568	-	-	-	-	CG12004	CG12004	PAIN	FBgn0035236	CG12004 CG12004	ENSG00000198792 TMEM184B Putative MAP kinase-activating protein C22orf5 (I, HOMG_6396)	ENSG00000198792 TMEM184B Putative MAP kinase-activating protein C22orf5 (OMCL_OG2_71083, COMP); ENSG00000164168 TMEM34 Transmembrane protein 34 (OMCL_OG2_71083); ENSG00000215155 TMEM184A CDNA FLJ24011 fis, clone KAT10529 (COMP)	ENSMUSG00000009035 Tmem184b Transmembrane protein 184B (I, HOMG_6396)	ENSMUSG00000036687 Tmem184a Transmembrane protein 184A (OMCL_OG2_71083, I, COMP); ENSMUSG00000009035 Tmem184b Transmembrane protein 184B (OMCL_OG2_71083, COMP); ENSMUSG00000031617 Tmem34 Transmembrane protein 34 (OMCL_OG2_71083)
CG17568	CG17568	BP	FBgn0032763	CG17568 CG17568	-	-	-	-	CG8849	mRpL24	PAIN	FBgn0031651	mRpL24 mitochondrial ribosomal protein L24 translation	ENSG00000143314 MRPL24 39S ribosomal protein L24, mitochondrial precursor (HOMG_12241, COMP, I, OMCL_OG2_71212)	-	ENSMUSG00000019710 Mrpl24 39S ribosomal protein L24, mitochondrial precursor (HOMG_12241, COMP, I, OMCL_OG2_71212)	-
CG1765	EcR	BP	FBgn0000546	EcR Ecdysone receptor chitin-based embryonic cuticle biosynthetic process,spermatid development,cardiac muscle development,border follicle cell migration,neuron development,dendrite morphogenesis,negative regulation of transcription, DNA-dependent,sperm individualization,neuron remodeling,ecdysone receptor-mediated signaling pathway,axonogenesis,dorsal vessel heart proper cell fate commitment,lar…	ENSG00000025434 NR1H3 Oxysterols receptor LXR-alpha (HOMG_21165, I, OMCL_OG2_79996)	ENSG00000131408 NR1H2 Oxysterols receptor LXR-beta (I)	ENSMUSG00000002108 Nr1h3 Oxysterols receptor LXR-alpha (HOMG_21165, I, OMCL_OG2_79996)	ENSMUSG00000060601 Nr1h2 Oxysterols receptor LXR-beta (I)	CG8203	Cdk5	PAIN	FBgn0013762	Cdk5 Cyclin-dependent kinase 5 synaptic vesicle transport,protein amino acid phosphorylation,cell cycle,neurotransmitter secretion	ENSG00000164885 CDK5 Cell division protein kinase 5 (COMP, I); 1020 CDK5 (HOMG_3623)	ENSG00000170312 CDC2 Cell division control protein 2 homolog (OMCL_OG2_70889); ENSG00000164885 CDK5 Cell division protein kinase 5 (OMCL_OG2_70889); ENSG00000108504 CDK3 Cell division protein kinase 3 (OMCL_OG2_70889); ENSG00000123374 CDK2 Cell division protein kinase 2 (OMCL_OG2_70889)	ENSMUSG00000028969 Cdk5 Cell division protein kinase 5 (HOMG_3623, COMP, I)	ENSMUSG00000019942 Cdc2a Cell division control protein 2 homolog (OMCL_OG2_70889); ENSMUSG00000025358 Cdk2 Cell division protein kinase 2 (OMCL_OG2_70889); ENSMUSG00000034288 Cdk3 Cell division protein kinase 3 (OMCL_OG2_70889); ENSMUSG00000028969 Cdk5 Cell division protein kinase 5 (OMCL_OG2_70889)
CG17650	CG17650	PAIN	FBgn0031365	CG17650 CG17650	-	-	-	-	CG7383	eg	BP	FBgn0000560	eg eagle central nervous system development,regulation of transcription, DNA-dependent	-	-	-	-
CG17666	CG17666	BP	FBgn0036311	CG17666 CG17666	-	-	-	-	CG1725	dlg1	PAIN	FBgn0001624	dlg1 discs large 1 morphogenesis of follicular epithelium,negative regulation of cell proliferation,establishment and/or maintenance of neuroblast polarity,septate junction assembly,basal protein localization,morphogenesis of a polarized epithelium,neuron differentiation,establishment and/or maintenance of polarity of embryonic epithelium,morphogenesis of an epithelium,establishment and/or mainte…	ENSG00000075711 DLG1 Disks large homolog 1 (I, HOMG_20869)	ENSG00000082458 DLG3 Discs large homolog 3 (I, OMCL_OG2_73729); ENSG00000132535 DLG4 Discs large homolog 4 (I, OMCL_OG2_73729); ENSG00000150672 DLG2 Discs large homolog 2 (I, OMCL_OG2_73729); ENSG00000075711 DLG1 Disks large homolog 1 (OMCL_OG2_73729)	ENSMUSG00000022770 Dlg1 Disks large homolog 1 (I, HOMG_20869)	ENSMUSG00000052572 Dlg2 Disks large homolog 2 (I, OMCL_OG2_73729); ENSMUSG00000020886 Dlg4 Disks large homolog 4 (I, OMCL_OG2_73729); ENSMUSG00000000881 Dlg3 Disks large homolog 3 (I, OMCL_OG2_73729); ENSMUSG00000022770 Dlg1 Disks large homolog 1 (OMCL_OG2_73729)
CG17666	CG17666	BP	FBgn0036311	CG17666 CG17666	-	-	-	-	CG6972	CG6972	PAIN	FBgn0039008	CG6972 CG6972	ENSG00000100418 NP_0565191 DJ347H134 protein (COMP)	ENSG00000167280 NP_0010360381 endo-beta-N-acetylglucosaminidase (OMCL_OG2_71252); ENSG00000100418 NP_0565191 DJ347H134 protein (OMCL_OG2_71252)	ENSMUSG00000022472 D15Wsu75e Adult male testis cDNA, RIKEN full-length enriched library, clone:1700013M01 product:hypothetical protein, full insert sequence CRL-1722 L5178Y-R cDNA, RIKEN full-length enriched library, clone: (COMP)	ENSMUSG00000033857 D230014K01Rik endo-beta-N-acetylglucosaminidase (OMCL_OG2_71252); ENSMUSG00000022472 D15Wsu75e Adult male testis cDNA, RIKEN full-length enriched library, clone:1700013M01 product:hypothetical protein, full insert sequence CRL-1722 L5178Y-R cDNA, RIKEN full-length enriched library, clone: (OMCL_OG2_71252)
CG17666	CG17666	BP	FBgn0036311	CG17666 CG17666	-	-	-	-	CG34401	CG34401	PAIN	FBgn0085430	CG34401	ENSG00000214655 KIAA0913 \N (COMP); 23053 KIAA0913 (HOMG_34313); ENSG00000162415 ZSWIM5 Zinc finger SWIM domain-containing protein 5 (I)	ENSG00000130449 ZSWIM6 Zinc finger SWIM domain-containing protein 6 (I); ENSG00000132003 ZSWIM4 Zinc finger SWIM domain-containing protein 4 (I)	ENSMUSG00000021819 2310021P13Rik Zinc finger SWIM domain-containing protein KIAA0913 (HOMG_34313, COMP, I, OMCL_OG2_76846)	-
CG17769	Dmel_CG17769	BP	FBgn0011273	And Androcam ciliary or flagellar motility,detection of calcium ion	ENSG00000129007 CALML4 calmodulin-like 4 isoform 2 (COMP)	-	ENSMUSG00000032246 Calml4 Calmodulin-like protein 4 (COMP)	-	CG2109	mRpL44	PAIN	FBgn0037330	mRpL44 mitochondrial ribosomal protein L44 RNA processing	ENSG00000135900 MRPL44 39S ribosomal protein L44, mitochondrial precursor (COMP, I, OMCL_OG2_78788, HOMG_11293)	-	ENSMUSG00000026248 Mrpl44 39S ribosomal protein L44, mitochondrial precursor (COMP, I, OMCL_OG2_78788, HOMG_11293)	-
CG17769	Dmel_CG17769	BP	FBgn0011273	And Androcam ciliary or flagellar motility,detection of calcium ion	ENSG00000129007 CALML4 calmodulin-like 4 isoform 2 (COMP)	-	ENSMUSG00000032246 Calml4 Calmodulin-like protein 4 (COMP)	-	CG33135	KCNQ	PAIN	FBgn0033494	KCNQ KCNQ potassium channel potassium ion transport	ENSG00000185760 KCNQ5 Potassium voltage-gated channel subfamily KQT member 5 (HOMG_28270, I)	ENSG00000075043 KCNQ2 Potassium voltage-gated channel subfamily KQT member 2 (OMCL_OG2_73388, I, COMP); ENSG00000184156 KCNQ3 Potassium voltage-gated channel subfamily KQT member 3 (OMCL_OG2_73388, I, COMP); ENSG00000117013 KCNQ4 Potassium voltage-gated channel subfamily KQT member 4 (OMCL_OG2_73388, I, COMP); ENSG00000185760 KCNQ5 Potassium voltage-gated channel subfamily KQT member 5 (OMCL_OG2_…	ENSMUSG00000028033 Kcnq5 Potassium voltage-gated channel subfamily KQT member 5 (HOMG_28270, I)	ENSMUSG00000016346 Kcnq2 Potassium voltage-gated channel subfamily KQT member 2 (OMCL_OG2_73388, I, COMP); ENSMUSG00000028631 Kcnq4 Potassium voltage-gated channel subfamily KQT member 4 (OMCL_OG2_73388, I, COMP); ENSMUSG00000056258 Kcnq3 Potassium voltage-gated channel subfamily KQT member 3 (OMCL_OG2_73388, I, COMP); ENSMUSG00000028033 Kcnq5 Potassium voltage-gated channel subfamily KQT member …
CG17769	Dmel_CG17769	BP	FBgn0011273	And Androcam ciliary or flagellar motility,detection of calcium ion	ENSG00000129007 CALML4 calmodulin-like 4 isoform 2 (COMP)	-	ENSMUSG00000032246 Calml4 Calmodulin-like protein 4 (COMP)	-	CG18069	CaMKII	PAIN	FBgn0004624	CaMKII Calcium/calmodulin-dependent protein kinase II neuromuscular junction development,courtship behavior,long-term memory,regulation of filopodium formation,protein amino acid phosphorylation,male courtship behavior,synaptic transmission,learning and/or memory	ENSG00000145349 CAMK2D Calcium/calmodulin-dependent protein kinase type II delta chain (HOMG_55561, I)	ENSG00000070808 CAMK2A Calcium/calmodulin-dependent protein kinase type II alpha chain (OMCL_OG2_70655, I); ENSG00000148660 CAMK2G Calcium/calmodulin-dependent protein kinase type II gamma chain (OMCL_OG2_70655, I); ENSG00000058404 CAMK2B Calcium/calmodulin-dependent protein kinase type II beta chain (OMCL_OG2_70655, I); ENSG00000008118 CAMK1G Calcium/calmodulin-dependent protein kinase type 1G (…	ENSMUSG00000053819 Camk2d Calcium/calmodulin-dependent protein kinase type II delta chain (HOMG_55561, I); ENSMUSG00000057897 Camk2b Calcium/calmodulin-dependent protein kinase type II beta chain (I)	ENSMUSG00000057897 Camk2b Calcium/calmodulin-dependent protein kinase type II beta chain (OMCL_OG2_70655, I); ENSMUSG00000021820 Camk2g Calcium/calmodulin-dependent protein kinase type II gamma chain (OMCL_OG2_70655, I); ENSMUSG00000024617 Camk2a Calcium/calmodulin-dependent protein kinase type II alpha chain (OMCL_OG2_70655, I); ENSMUSG00000053819 Camk2d Calcium/calmodulin-dependent protein kina…
CG17826	CG17826	BP	FBgn0036227	CG17826 CG17826 chitin metabolic process	-	-	-	-	CG1725	dlg1	PAIN	FBgn0001624	dlg1 discs large 1 morphogenesis of follicular epithelium,negative regulation of cell proliferation,establishment and/or maintenance of neuroblast polarity,septate junction assembly,basal protein localization,morphogenesis of a polarized epithelium,neuron differentiation,establishment and/or maintenance of polarity of embryonic epithelium,morphogenesis of an epithelium,establishment and/or mainte…	ENSG00000075711 DLG1 Disks large homolog 1 (I, HOMG_20869)	ENSG00000082458 DLG3 Discs large homolog 3 (I, OMCL_OG2_73729); ENSG00000132535 DLG4 Discs large homolog 4 (I, OMCL_OG2_73729); ENSG00000150672 DLG2 Discs large homolog 2 (I, OMCL_OG2_73729); ENSG00000075711 DLG1 Disks large homolog 1 (OMCL_OG2_73729)	ENSMUSG00000022770 Dlg1 Disks large homolog 1 (I, HOMG_20869)	ENSMUSG00000052572 Dlg2 Disks large homolog 2 (I, OMCL_OG2_73729); ENSMUSG00000020886 Dlg4 Disks large homolog 4 (I, OMCL_OG2_73729); ENSMUSG00000000881 Dlg3 Disks large homolog 3 (I, OMCL_OG2_73729); ENSMUSG00000022770 Dlg1 Disks large homolog 1 (OMCL_OG2_73729)
CG17894	cnc	BP	FBgn0000338	cnc cap-n-collar regulation of pole plasm oskar mRNA localization,regulation of bicoid mRNA localization,bicoid mRNA localization,maintenance of oocyte nucleus localization during oocyte axis determination,oocyte microtubule cytoskeleton polarization,pole plasm oskar mRNA localization,regulation of transcription, DNA-dependent,blastoderm segmentation,oocyte dorsal/ventral axis determination	ENSG00000082641 NFE2L1 Nuclear factor erythroid 2-related factor 1 (OMCL_OG2_77990)	ENSG00000123405 NFE2 Transcription factor NF-E2 45 kDa subunit (COMP); ENSG00000050344 NFE2L3 Nuclear factor erythroid 2-related factor 3 (COMP); ENSG00000082641 NFE2L1 Nuclear factor erythroid 2-related factor 1 (COMP); ENSG00000116044 NFE2L2 Nuclear factor erythroid 2-related factor 2 (COMP)	ENSMUSG00000038615 Nfe2l1 Nuclear factor erythroid 2-related factor 1 (OMCL_OG2_77990); ENSMUSG00000058794 Nfe2 nuclear factor, erythroid derived 2 (I)	ENSMUSG00000038615 Nfe2l1 Nuclear factor erythroid 2-related factor 1 (I, COMP); ENSMUSG00000015839 Nfe2l2 Nuclear factor erythroid 2-related factor 2 (I, COMP); ENSMUSG00000029832 Nfe2l3 Nuclear factor erythroid 2-related factor 3 (COMP); ENSMUSG00000058794 Nfe2 nuclear factor, erythroid derived 2 (COMP)	CG4799	Pen	PAIN	FBgn0011823	Pen Pendulin protein import into nucleus, docking,sperm individualization,gravitaxis,cell proliferation,NLS-bearing substrate import into nucleus,lymph gland development,cytoplasmic transport,protein import into nucleus,cytoplasmic transport, nurse cell to oocyte,ovarian ring canal formation	ENSG00000182481 KPNA2 Importin subunit alpha-2 (OMCL_OG2_76621, I)	ENSG00000182481 KPNA2 Importin subunit alpha-2 (HOMG_1708, COMP); ENSG00000185467 A4D277_HUMAN Similar to importin alpha 1b (I, COMP); ENSG00000214180 \N \N (COMP); ENSG00000215769 IMA2_HUMAN Importin subunit alpha-2 (COMP); ENSG00000214035 NP_0010390111 similar to Importin alpha-2 subunit , mRNA (COMP); 728860 LOC728860 (HOMG_1708)	ENSMUSG00000018362 Kpna2 Importin subunit alpha-2 (I)	ENSMUSG00000018362 Kpna2 Importin subunit alpha-2 (OMCL_OG2_76621, HOMG_1708, COMP); ENSMUSG00000050278 (OMCL_OG2_76621); ENSMUSG00000069083 \N \N (OMCL_OG2_76621); ENSMUSG00000038770 AW146299 expressed sequence AW146299 , mRNA (COMP); 100043906 LOC100043906 (HOMG_1708); 100039592 LOC100039592 (HOMG_1708); ENSMUSG00000066878 \N \N (OMCL_OG2_76621)
CG17894	cnc	BP	FBgn0000338	cnc cap-n-collar regulation of pole plasm oskar mRNA localization,regulation of bicoid mRNA localization,bicoid mRNA localization,maintenance of oocyte nucleus localization during oocyte axis determination,oocyte microtubule cytoskeleton polarization,pole plasm oskar mRNA localization,regulation of transcription, DNA-dependent,blastoderm segmentation,oocyte dorsal/ventral axis determination	ENSG00000082641 NFE2L1 Nuclear factor erythroid 2-related factor 1 (OMCL_OG2_77990)	ENSG00000123405 NFE2 Transcription factor NF-E2 45 kDa subunit (COMP); ENSG00000050344 NFE2L3 Nuclear factor erythroid 2-related factor 3 (COMP); ENSG00000082641 NFE2L1 Nuclear factor erythroid 2-related factor 1 (COMP); ENSG00000116044 NFE2L2 Nuclear factor erythroid 2-related factor 2 (COMP)	ENSMUSG00000038615 Nfe2l1 Nuclear factor erythroid 2-related factor 1 (OMCL_OG2_77990); ENSMUSG00000058794 Nfe2 nuclear factor, erythroid derived 2 (I)	ENSMUSG00000038615 Nfe2l1 Nuclear factor erythroid 2-related factor 1 (I, COMP); ENSMUSG00000015839 Nfe2l2 Nuclear factor erythroid 2-related factor 2 (I, COMP); ENSMUSG00000029832 Nfe2l3 Nuclear factor erythroid 2-related factor 3 (COMP); ENSMUSG00000058794 Nfe2 nuclear factor, erythroid derived 2 (COMP)	CG12131	Adam	PAIN	FBgn0027619	Adam Adam translational initiation	ENSG00000104131 EIF3J Eukaryotic translation initiation factor 3 subunit 1 (HOMG_37845, OMCL_OG2_74149, COMP, I)	-	ENSMUSG00000043424 Eif3j predicted gene, ENSMUSG00000043424 (OMCL_OG2_74149, I); ENSMUSG00000027236 Eif3j predicted gene, ENSMUSG00000043424 (I); MGI:1925905 Eif3j eukaryotic translation initiation factor 3, subunit J (I)	ENSMUSG00000027236 Eif3j predicted gene, ENSMUSG00000043424 (HOMG_37845, COMP); ENSMUSG00000043424 Eif3j predicted gene, ENSMUSG00000043424 (COMP); 100042807 LOC100042807 (HOMG_37845)
CG17943	comm	PAIN	FBgn0010105	comm commissureless axon midline choice point recognition,synaptogenesis,endocytosis,dendrite morphogenesis,neuron recognition,axon guidance,nervous system development	-	-	-	-	CG3395	RpS9	BP	FBgn0010408	RpS9 Ribosomal protein S9 mitotic spindle organization and biogenesis,translation,mitotic spindle elongation	ENSG00000170889 RPS9 40S ribosomal protein S9 (OMCL_OG2_71542, HOMG_68145, COMP, I)	ENSG00000172887 \N \N (I)	ENSMUSG00000006333 Rps9 40S ribosomal protein S9 (OMCL_OG2_71542, HOMG_68145, COMP, I)	-
CG18088	CG18088	PAIN	FBgn0032082	CG18088 CG18088	-	-	-	-	CG6510	RpL18A	BP	FBgn0010409	RpL18A Ribosomal protein L18A mitotic spindle organization and biogenesis,translation,mitotic spindle elongation	ENSG00000105640 RPL18A 60S ribosomal protein L18a (I, OMCL_OG2_71481); ENSG00000188096 (HOMG_757)	ENSG00000188096 (I); ENSG00000212695 Q76N54_HUMAN Ribosomal protein L18a (COMP); ENSG00000105640 RPL18A 60S ribosomal protein L18a (COMP)	ENSMUSG00000045128 Rpl18a 60S ribosomal protein L18a (I); 100041686 LOC100041686 (HOMG_757)	ENSMUSG00000045128 Rpl18a 60S ribosomal protein L18a (COMP, OMCL_OG2_71481); ENSMUSG00000066620 \N \N (I, COMP); ENSMUSG00000067040 (OMCL_OG2_71481); MGI:3643348 EG233075 predicted gene, EG233075 (I); ENSMUSG00000080079 \N \N (COMP)
CG18332	CSN3	PAIN	FBgn0027055	CSN3 COP9 complex homolog subunit 3	ENSG00000141030 COPS3 COP9 signalosome complex subunit 3 (HOMG_2710, COMP, I, OMCL_OG2_74691)	-	ENSMUSG00000019373 Cops3 COP9 signalosome complex subunit 3 (HOMG_2710, COMP, I, OMCL_OG2_74691)	-	CG13867	MED8	BP	FBgn0034503	MED8 Mediator complex subunit 8 transcription initiation from RNA polymerase II promoter,transcription from RNA polymerase II promoter	ENSG00000159479 MED8 Mediator of RNA polymerase II transcription subunit 8 homolog (COMP, I, OMCL_OG2_78217, HOMG_10560)	-	ENSMUSG00000006392 Med8 Mediator of RNA polymerase II transcription subunit 8 (COMP, I, OMCL_OG2_78217, HOMG_10560)	-
CG18350	Sxl	PAIN	FBgn0003659	Sxl Sex lethal female germ-line sex determination,germ cell development,regulation of nuclear mRNA splicing, via spliceosome,female sex differentiation,smoothened signaling pathway,sex determination, primary response to X:A ratio,female sex determination,alternative nuclear mRNA splicing, via spliceosome,negative regulation of nuclear mRNA splicing, via spliceosome,somatic sex determination,dosag…	-	-	-	-	CG5642	CG5642	BP	FBgn0036258	CG5642 CG5642	ENSG00000100129 EIF3EIP Eukaryotic translation initiation factor 3 subunit 6-interacting protein (HOMG_9380, COMP, I, OMCL_OG2_72863)	-	ENSMUSG00000033047 Eif3eip Eukaryotic translation initiation factor 3 subunit E-interacting protein (HOMG_9380, COMP, I, OMCL_OG2_72863)	-
CG18350	Sxl	PAIN	FBgn0003659	Sxl Sex lethal female germ-line sex determination,germ cell development,regulation of nuclear mRNA splicing, via spliceosome,female sex differentiation,smoothened signaling pathway,sex determination, primary response to X:A ratio,female sex determination,alternative nuclear mRNA splicing, via spliceosome,negative regulation of nuclear mRNA splicing, via spliceosome,somatic sex determination,dosag…	-	-	-	-	CG12200	CG12200	BP	FBgn0031018	CG12200 CG12200	-	ENSG00000215277 \N \N (COMP); ENSG00000178222 RNF212 ring finger protein 212 (COMP)	ENSMUSG00000071425 \N \N (I)	ENSMUSG00000071425 \N \N (COMP); ENSMUSG00000055385 Rnf212 Activated spleen cDNA, RIKEN full-length enriched library, clone:F830003B07 product:hypothetical protein, full insert sequence (COMP)
CG18350	Sxl	PAIN	FBgn0003659	Sxl Sex lethal female germ-line sex determination,germ cell development,regulation of nuclear mRNA splicing, via spliceosome,female sex differentiation,smoothened signaling pathway,sex determination, primary response to X:A ratio,female sex determination,alternative nuclear mRNA splicing, via spliceosome,negative regulation of nuclear mRNA splicing, via spliceosome,somatic sex determination,dosag…	-	-	-	-	CG31362	Jon99Ciii	BP	FBgn0003357	Jon99Ciii Jonah 99Ciii proteolysis,digestion	-	-	-	ENSMUSG00000023433 Ela3 elastase 3, pancreatic (I); ENSMUSG00000062478 Ctrc Chymotrypsin-C precursor (I); ENSMUSG00000058579 Ela2a Elastase-2A precursor (I); ENSMUSG00000031957 Ctrb1 Chymotrypsinogen B precursor (I); ENSMUSG00000031896 Ctrl chymotrypsin-like (I); ENSMUSG00000023031 Ela1 elastase 1, pancreatic (I); ENSMUSG00000078520 A2A9U8_MOUSE Novel protein similar to elastase 3B, pancreatic (I)
CG18350	Sxl	PAIN	FBgn0003659	Sxl Sex lethal female germ-line sex determination,germ cell development,regulation of nuclear mRNA splicing, via spliceosome,female sex differentiation,smoothened signaling pathway,sex determination, primary response to X:A ratio,female sex determination,alternative nuclear mRNA splicing, via spliceosome,negative regulation of nuclear mRNA splicing, via spliceosome,somatic sex determination,dosag…	-	-	-	-	CG7001	Pk17E	BP	FBgn0004462	Pk17E Protein kinase-like 17E protein amino acid phosphorylation	ENSG00000167524 SG494_HUMAN Uncharacterized serine/threonine-protein kinase SgK494 (COMP)	-	ENSMUSG00000037593 BC030499 Uncharacterized serine/threonine-protein kinase SgK494 (COMP)	-
CG18350	Sxl	PAIN	FBgn0003659	Sxl Sex lethal female germ-line sex determination,germ cell development,regulation of nuclear mRNA splicing, via spliceosome,female sex differentiation,smoothened signaling pathway,sex determination, primary response to X:A ratio,female sex determination,alternative nuclear mRNA splicing, via spliceosome,negative regulation of nuclear mRNA splicing, via spliceosome,somatic sex determination,dosag…	-	-	-	-	CG12992	CG12992	BP	FBgn0030846	CG12992 CG12992	-	-	-	-
CG18350	Sxl	PAIN	FBgn0003659	Sxl Sex lethal female germ-line sex determination,germ cell development,regulation of nuclear mRNA splicing, via spliceosome,female sex differentiation,smoothened signaling pathway,sex determination, primary response to X:A ratio,female sex determination,alternative nuclear mRNA splicing, via spliceosome,negative regulation of nuclear mRNA splicing, via spliceosome,somatic sex determination,dosag…	-	-	-	-	CG3731	CG3731	BP	FBgn0038271	CG3731 CG3731 proteolysis,protein processing,mitochondrial electron transport, ubiquinol to cytochrome c	ENSG00000105819 PMPCB Mitochondrial-processing peptidase subunit beta, mitochondrial precursor (HOMG_3160, I)	ENSG00000010256 UQCRC1 Ubiquinol-cytochrome-c reductase complex core protein 1, mitochondrial precursor (OMCL_OG2_70923, COMP); ENSG00000105819 PMPCB Mitochondrial-processing peptidase subunit beta, mitochondrial precursor (OMCL_OG2_70923, COMP)	ENSMUSG00000029017 Pmpcb Mitochondrial-processing peptidase subunit beta, mitochondrial precursor (HOMG_3160, I)	ENSMUSG00000025651 Uqcrc1 Cytochrome b-c1 complex subunit 1, mitochondrial precursor (OMCL_OG2_70923, COMP); ENSMUSG00000029017 Pmpcb Mitochondrial-processing peptidase subunit beta, mitochondrial precursor (OMCL_OG2_70923, COMP)
CG18350	Sxl	PAIN	FBgn0003659	Sxl Sex lethal female germ-line sex determination,germ cell development,regulation of nuclear mRNA splicing, via spliceosome,female sex differentiation,smoothened signaling pathway,sex determination, primary response to X:A ratio,female sex determination,alternative nuclear mRNA splicing, via spliceosome,negative regulation of nuclear mRNA splicing, via spliceosome,somatic sex determination,dosag…	-	-	-	-	CG5792	CG5792	BP	FBgn0032455	CG5792 CG5792	ENSG00000104872 PIH1D1 NOP17 (HOMG_9914, I)	ENSG00000104872 PIH1D1 NOP17 (COMP, OMCL_OG2_73633); ENSG00000165506 C14orf104 Uncharacterized protein C14orf104 (COMP)	ENSMUSG00000003423 Pih1d1 PIH1 domain-containing protein 1 (HOMG_9914, COMP, I)	ENSMUSG00000003423 Pih1d1 PIH1 domain-containing protein 1 (OMCL_OG2_73633)
CG18350	Sxl	PAIN	FBgn0003659	Sxl Sex lethal female germ-line sex determination,germ cell development,regulation of nuclear mRNA splicing, via spliceosome,female sex differentiation,smoothened signaling pathway,sex determination, primary response to X:A ratio,female sex determination,alternative nuclear mRNA splicing, via spliceosome,negative regulation of nuclear mRNA splicing, via spliceosome,somatic sex determination,dosag…	-	-	-	-	CG31973	CG31973	BP	FBgn0051973	CG31973 CG31973 chitin metabolic process	-	-	-	-
CG18350	Sxl	PAIN	FBgn0003659	Sxl Sex lethal female germ-line sex determination,germ cell development,regulation of nuclear mRNA splicing, via spliceosome,female sex differentiation,smoothened signaling pathway,sex determination, primary response to X:A ratio,female sex determination,alternative nuclear mRNA splicing, via spliceosome,negative regulation of nuclear mRNA splicing, via spliceosome,somatic sex determination,dosag…	-	-	-	-	CG4394	Traf3	BP	FBgn0030748	Traf-like TNF-receptor-associated factor-like signal transduction,defense response	-	-	-	-
CG18350	Sxl	PAIN	FBgn0003659	Sxl Sex lethal female germ-line sex determination,germ cell development,regulation of nuclear mRNA splicing, via spliceosome,female sex differentiation,smoothened signaling pathway,sex determination, primary response to X:A ratio,female sex determination,alternative nuclear mRNA splicing, via spliceosome,negative regulation of nuclear mRNA splicing, via spliceosome,somatic sex determination,dosag…	-	-	-	-	CG10498	cdc2c	BP	FBgn0004107	cdc2c cdc2c G2/M transition of mitotic cell cycle,regulation of cell cycle,protein amino acid phosphorylation,G1/S transition of mitotic cell cycle,cellular process,JAK-STAT cascade	ENSG00000123374 CDK2 Cell division protein kinase 2 (I, HOMG_74409)	ENSG00000108504 CDK3 Cell division protein kinase 3 (OMCL_OG2_70889, I, COMP); ENSG00000123374 CDK2 Cell division protein kinase 2 (OMCL_OG2_70889, COMP); ENSG00000170312 CDC2 Cell division control protein 2 homolog (OMCL_OG2_70889); ENSG00000164885 CDK5 Cell division protein kinase 5 (OMCL_OG2_70889)	ENSMUSG00000025358 Cdk2 Cell division protein kinase 2 (I, HOMG_74409); ENSMUSG00000034288 Cdk3 Cell division protein kinase 3 (I)	ENSMUSG00000025358 Cdk2 Cell division protein kinase 2 (OMCL_OG2_70889, I, COMP); ENSMUSG00000034288 Cdk3 Cell division protein kinase 3 (OMCL_OG2_70889, COMP); ENSMUSG00000019942 Cdc2a Cell division control protein 2 homolog (OMCL_OG2_70889); ENSMUSG00000028969 Cdk5 Cell division protein kinase 5 (OMCL_OG2_70889)
CG18350	Sxl	PAIN	FBgn0003659	Sxl Sex lethal female germ-line sex determination,germ cell development,regulation of nuclear mRNA splicing, via spliceosome,female sex differentiation,smoothened signaling pathway,sex determination, primary response to X:A ratio,female sex determination,alternative nuclear mRNA splicing, via spliceosome,negative regulation of nuclear mRNA splicing, via spliceosome,somatic sex determination,dosag…	-	-	-	-	CG1825	Map60	BP	FBgn0010342	Map60 Microtubule-associated protein 60 microtubule-based process	-	-	-	-
CG1836	Rad23	BP	FBgn0026777	Rad23 Rad23 proteasomal ubiquitin-dependent protein catabolic process,protein modification process,nucleotide-excision repair	ENSG00000119318 RAD23B UV excision repair protein RAD23 homolog B (HOMG_37704, I)	ENSG00000179262 RAD23A UV excision repair protein RAD23 homolog A (I, COMP, OMCL_OG2_71276); ENSG00000119318 RAD23B UV excision repair protein RAD23 homolog B (COMP, OMCL_OG2_71276)	ENSMUSG00000028426 Rad23b UV excision repair protein RAD23 homolog B (HOMG_37704, I); ENSMUSG00000003813 Rad23a UV excision repair protein RAD23 homolog A (I); MGI:105128 Rad23b RAD23b homolog S. cerevisiae (I)	ENSMUSG00000003813 Rad23a UV excision repair protein RAD23 homolog A (I, COMP, OMCL_OG2_71276); ENSMUSG00000028426 Rad23b UV excision repair protein RAD23 homolog B (COMP, OMCL_OG2_71276)	CG32016	CG32016	PAIN	FBgn0052016	CG32016 CG32016	ENSG00000184708 EIF4ENIF1 Eukaryotic translation initiation factor 4E transporter (OMCL_OG2_82543, COMP)	-	ENSMUSG00000020454 Eif4enif1 Eukaryotic translation initiation factor 4E transporter (OMCL_OG2_82543, COMP, I)	-
CG1836	Rad23	BP	FBgn0026777	Rad23 Rad23 proteasomal ubiquitin-dependent protein catabolic process,protein modification process,nucleotide-excision repair	ENSG00000119318 RAD23B UV excision repair protein RAD23 homolog B (HOMG_37704, I)	ENSG00000179262 RAD23A UV excision repair protein RAD23 homolog A (I, COMP, OMCL_OG2_71276); ENSG00000119318 RAD23B UV excision repair protein RAD23 homolog B (COMP, OMCL_OG2_71276)	ENSMUSG00000028426 Rad23b UV excision repair protein RAD23 homolog B (HOMG_37704, I); ENSMUSG00000003813 Rad23a UV excision repair protein RAD23 homolog A (I); MGI:105128 Rad23b RAD23b homolog S. cerevisiae (I)	ENSMUSG00000003813 Rad23a UV excision repair protein RAD23 homolog A (I, COMP, OMCL_OG2_71276); ENSMUSG00000028426 Rad23b UV excision repair protein RAD23 homolog B (COMP, OMCL_OG2_71276)	CG14506	CG14506	PAIN	FBgn0039659	CG14506 CG14506	-	-	-	-
CG1856	ttk	BP	FBgn0003870	ttk tramtrack neuron development,dendrite morphogenesis,cell fate determination,regulation of transcription from RNA polymerase II promoter,peripheral nervous system development,dorsal appendage formation,negative regulation of transcription from RNA polymerase II promoter,R7 cell development,ovarian follicle cell development	-	-	-	-	CG3619	Dl	PAIN	FBgn0000463	Dl Delta open tracheal system development,cell fate specification,lateral inhibition,compound eye cone cell fate commitment,oocyte anterior/posterior axis determination,apposition of dorsal and ventral imaginal disc-derived wing surfaces,R8 cell differentiation,actin filament organization,imaginal disc-derived leg morphogenesis,mesoderm development,establishment of ommatidial polarity,peripheral …	ENSG00000198719 DLL1 Delta-like protein 1 precursor (I, HOMG_4104)	ENSG00000128917 DLL4 Delta-like protein 4 precursor (I, COMP, OMCL_OG2_74825); ENSG00000198719 DLL1 Delta-like protein 1 precursor (COMP, OMCL_OG2_74825)	ENSMUSG00000014773 Dll1 Delta-like protein 1 precursor (I, HOMG_4104)	ENSMUSG00000027314 Dll4 Delta-like protein 4 precursor (I, COMP, OMCL_OG2_74825); ENSMUSG00000014773 Dll1 Delta-like protein 1 precursor (COMP, OMCL_OG2_74825)
CG1856	ttk	BP	FBgn0003870	ttk tramtrack neuron development,dendrite morphogenesis,cell fate determination,regulation of transcription from RNA polymerase II promoter,peripheral nervous system development,dorsal appendage formation,negative regulation of transcription from RNA polymerase II promoter,R7 cell development,ovarian follicle cell development	-	-	-	-	CG5711	Arr1	PAIN	FBgn0000120	Arr1 Arrestin 1 phototransduction,photoreceptor cell maintenance,endocytosis,metarhodopsin inactivation,deactivation of rhodopsin mediated signaling	-	ENSG00000130561 SAG S-arrestin (COMP); ENSG00000137486 ARRB1 Beta-arrestin-1 (COMP); ENSG00000141480 ARRB2 Beta-arrestin-2 (COMP); ENSG00000120500 ARR3 Arrestin-C (COMP)	-	ENSMUSG00000056055 Sag S-arrestin (COMP); ENSMUSG00000060890 Arr3 Arrestin-C (COMP); ENSMUSG00000060216 Arrb2 Beta-arrestin-2 (COMP); ENSMUSG00000018909 Arrb1 Beta-arrestin-1 (COMP)
CG18627	betaggt-II	BP	FBgn0028970	betaggt-II Î² subunit of type II geranylgeranyl transferase	ENSG00000137955 RABGGTB Geranylgeranyl transferase type-2 subunit beta (OMCL_OG2_72065, COMP, I, HOMG_3371)	-	ENSMUSG00000038975 Rabggtb Geranylgeranyl transferase type-2 subunit beta (OMCL_OG2_72065, COMP, I, HOMG_3371)	-	CG10800	Rca1	PAIN	FBgn0017551	Rca1 Regulator of cyclin A1 eye-antennal disc morphogenesis,compound eye morphogenesis,G2 phase of mitotic cell cycle,G1/S transition of mitotic cell cycle,regulation of mitosis,negative regulation of protein catabolic process	-	-	-	-
CG18627	betaggt-II	BP	FBgn0028970	betaggt-II Î² subunit of type II geranylgeranyl transferase	ENSG00000137955 RABGGTB Geranylgeranyl transferase type-2 subunit beta (OMCL_OG2_72065, COMP, I, HOMG_3371)	-	ENSMUSG00000038975 Rabggtb Geranylgeranyl transferase type-2 subunit beta (OMCL_OG2_72065, COMP, I, HOMG_3371)	-	CG5703	CG5703	PAIN	FBgn0030853	CG5703 CG5703 mitochondrial electron transport, NADH to ubiquinone	ENSG00000178127 NDUFV2 NADH dehydrogenase flavoprotein 2, mitochondrial precursor (I, HOMG_10884)	ENSG00000188699 \N \N (COMP, I, OMCL_OG2_71823); ENSG00000178127 NDUFV2 NADH dehydrogenase flavoprotein 2, mitochondrial precursor (COMP, OMCL_OG2_71823)	ENSMUSG00000024099 Ndufv2 NADH dehydrogenase flavoprotein 2, mitochondrial precursor (I, HOMG_10884, OMCL_OG2_71823)	ENSMUSG00000024099 Ndufv2 NADH dehydrogenase flavoprotein 2, mitochondrial precursor (COMP)
CG18731	CG18731	BP	FBgn0042213	CG18731 CG18731	-	-	-	-	CG1968	CG1968	PAIN	FBgn0033401	CG1968 CG1968	ENSG00000133103 COG6 Conserved oligomeric Golgi complex component 6 (HOMG_10802, COMP, I, OMCL_OG2_73745)	-	ENSMUSG00000027742 Cog6 Conserved oligomeric Golgi complex component 6 (HOMG_10802, COMP, I, OMCL_OG2_73745)	-
CG18806	CG18806	BP	FBgn0042129	CG18806 CG18806	-	-	-	-	CG33135	KCNQ	PAIN	FBgn0033494	KCNQ KCNQ potassium channel potassium ion transport	ENSG00000185760 KCNQ5 Potassium voltage-gated channel subfamily KQT member 5 (HOMG_28270, I)	ENSG00000075043 KCNQ2 Potassium voltage-gated channel subfamily KQT member 2 (OMCL_OG2_73388, I, COMP); ENSG00000184156 KCNQ3 Potassium voltage-gated channel subfamily KQT member 3 (OMCL_OG2_73388, I, COMP); ENSG00000117013 KCNQ4 Potassium voltage-gated channel subfamily KQT member 4 (OMCL_OG2_73388, I, COMP); ENSG00000185760 KCNQ5 Potassium voltage-gated channel subfamily KQT member 5 (OMCL_OG2_…	ENSMUSG00000028033 Kcnq5 Potassium voltage-gated channel subfamily KQT member 5 (HOMG_28270, I)	ENSMUSG00000016346 Kcnq2 Potassium voltage-gated channel subfamily KQT member 2 (OMCL_OG2_73388, I, COMP); ENSMUSG00000028631 Kcnq4 Potassium voltage-gated channel subfamily KQT member 4 (OMCL_OG2_73388, I, COMP); ENSMUSG00000056258 Kcnq3 Potassium voltage-gated channel subfamily KQT member 3 (OMCL_OG2_73388, I, COMP); ENSMUSG00000028033 Kcnq5 Potassium voltage-gated channel subfamily KQT member …
CG1894	CG1894	BP	FBgn0039585	CG1894 CG1894	-	-	-	-	CG33106	mask	PAIN	FBgn0043884	mask multiple ankyrin repeats single KH domain cell proliferation,compound eye photoreceptor cell differentiation,transmembrane receptor protein tyrosine kinase signaling pathway,cytoskeletal anchoring,antimicrobial humoral response,cellular process	ENSG00000131503 ANKHD1-EIF4EBP3 Eukaryotic translation initiation factor 4E-binding protein 3 (I)	ENSG00000132466 ANKRD17 ankyrin repeat domain protein 17 isoform b (OMCL_OG2_75090, I); ENSG00000131503 ANKHD1-EIF4EBP3 Eukaryotic translation initiation factor 4E-binding protein 3 (OMCL_OG2_75090)	ENSMUSG00000024483 Eif4ebp3 Eukaryotic translation initiation factor 4E-binding protein 3 (I)	ENSMUSG00000055204 Ankrd17 Ankyrin repeat domain-containing protein 17 (OMCL_OG2_75090, I); ENSMUSG00000024483 Eif4ebp3 Eukaryotic translation initiation factor 4E-binding protein 3 (OMCL_OG2_75090)
CG1894	CG1894	BP	FBgn0039585	CG1894 CG1894	-	-	-	-	CG9032	sun	PAIN	FBgn0014391	sun stunted response to oxidative stress,proton transport,determination of adult life span,ATP synthesis coupled proton transport	-	ENSG00000124172 ATP5E ATP synthase epsilon chain, mitochondrial (OMCL_OG2_75385); ENSG00000180389 NR_0021621 ATP synthase, H+ transporting, mitochondrial F1 complex, epsilon subunit pseudogene 2 on chromosome 13 (OMCL_OG2_75385)	ENSMUSG00000016252 Atp5e ATP synthase subunit epsilon, mitochondrial (I)	ENSMUSG00000016252 Atp5e ATP synthase subunit epsilon, mitochondrial (OMCL_OG2_75385)
CG1966	Acf1	PAIN	FBgn0027620	Acf1 ATP-dependent chromatin assembly factor large subunit nucleosome positioning,chromatin assembly or disassembly,neuron development,dendrite morphogenesis,regulation of transcription, DNA-dependent,nucleosome mobilization,nucleosome assembly,muscle development,epidermis development	ENSG00000198604 BAZ1A Bromodomain adjacent to zinc finger domain protein 1A WCRF18 (HOMG_45654, I, OMCL_OG2_78483)	-	ENSMUSG00000035021 Baz1a Bromodomain adjacent to zinc finger domain protein 1A (HOMG_45654, I, OMCL_OG2_78483)	-	CG8965	CG8965	BP	FBgn0031745	CG8965 CG8965 signal transduction	-	-	-	-
CG1968	CG1968	PAIN	FBgn0033401	CG1968 CG1968	ENSG00000133103 COG6 Conserved oligomeric Golgi complex component 6 (HOMG_10802, COMP, I, OMCL_OG2_73745)	-	ENSMUSG00000027742 Cog6 Conserved oligomeric Golgi complex component 6 (HOMG_10802, COMP, I, OMCL_OG2_73745)	-	CG10318	NC2alpha	BP	FBgn0034650	NC2alpha NC2Î± negative regulation of transcriptional preinitiation complex assembly	ENSG00000175550 DRAP1 Dr1-associated corepressor (COMP, OMCL_OG2_73542)	-	ENSMUSG00000024914 Drap1 Dr1-associated corepressor (COMP, I, OMCL_OG2_73542)	-
CG1968	CG1968	PAIN	FBgn0033401	CG1968 CG1968	ENSG00000133103 COG6 Conserved oligomeric Golgi complex component 6 (HOMG_10802, COMP, I, OMCL_OG2_73745)	-	ENSMUSG00000027742 Cog6 Conserved oligomeric Golgi complex component 6 (HOMG_10802, COMP, I, OMCL_OG2_73745)	-	CG7352	CG7352	BP	FBgn0037581	CG7352 CG7352	ENSG00000138587 MNS1 meiosis-specific nuclear structural 1 (OMCL_OG2_75133)	-	ENSMUSG00000032221 Mns1 Meiosis-specific nuclear structural protein 1 (I, OMCL_OG2_75133)	-
CG1968	CG1968	PAIN	FBgn0033401	CG1968 CG1968	ENSG00000133103 COG6 Conserved oligomeric Golgi complex component 6 (HOMG_10802, COMP, I, OMCL_OG2_73745)	-	ENSMUSG00000027742 Cog6 Conserved oligomeric Golgi complex component 6 (HOMG_10802, COMP, I, OMCL_OG2_73745)	-	CG6570	lbl	BP	FBgn0008651	lbl ladybird late regulation of cell fate specification,regulation of neuron differentiation,mesodermal cell fate specification,regulation of transcription, DNA-dependent,regulation of transcription,central nervous system development,heart development,muscle development	ENSG00000138136 LBX1 Transcription factor LBX1 (I)	ENSG00000138136 LBX1 Transcription factor LBX1 (OMCL_OG2_76834)	ENSMUSG00000025216 Lbx1 Transcription factor LBX1 (I)	ENSMUSG00000034968 Lbx2 Transcription factor LBX2 (I); ENSMUSG00000025216 Lbx1 Transcription factor LBX1 (OMCL_OG2_76834)
CG1968	CG1968	PAIN	FBgn0033401	CG1968 CG1968	ENSG00000133103 COG6 Conserved oligomeric Golgi complex component 6 (HOMG_10802, COMP, I, OMCL_OG2_73745)	-	ENSMUSG00000027742 Cog6 Conserved oligomeric Golgi complex component 6 (HOMG_10802, COMP, I, OMCL_OG2_73745)	-	CG4617	CG4617	BP	FBgn0029936	CG4617 CG4617 regulation of transcription, DNA-dependent	ENSG00000100281 HMG2L1 High mobility group protein 2-like 1 (OMCL_OG2_80517, COMP, I, HOMG_4007)	-	ENSMUSG00000034518 Hmgb2l1 high mobility group box 2-like 1 (OMCL_OG2_80517, COMP, I, HOMG_4007)	-
CG1977	alpha-Spec	BP	FBgn0250789	alpha-Spec Î± Spectrin cell-cell adhesion,ring canal formation, actin assembly,germ-line cyst formation,maintenance of presynaptic active zone structure,ovarian follicle cell development,instar larval development,axon midline choice point recognition,long-term strengthening of neuromuscular junction,regulation of cell shape,fusome organization and biogenesis,spectrosome organization and biogenesi…	ENSG00000197694 SPTAN1 Spectrin alpha chain, brain (COMP, I, HOMG_2353)	ENSG00000160460 SPTBN4 Spectrin beta chain, brain 3 (OMCL_OG2_71149); ENSG00000115306 SPTBN1 Spectrin beta chain, brain 1 (OMCL_OG2_71149); ENSG00000070182 SPTB Spectrin beta chain, erythrocyte (OMCL_OG2_71149); ENSG00000173898 SPTBN2 Spectrin beta chain, brain 2 (OMCL_OG2_71149); ENSG00000163554 SPTA1 Spectrin alpha chain, erythrocyte (OMCL_OG2_71149); ENSG00000197694 SPTAN1 Spectrin alpha chain…	ENSMUSG00000057738 Spna2 Spectrin alpha chain, brain (COMP, I, HOMG_2353); ENSMUSG00000026532 Spna1 Spectrin alpha chain, erythrocyte (I)	ENSMUSG00000021061 Spnb1 Spectrin beta chain, erythrocyte (OMCL_OG2_71149); ENSMUSG00000057738 Spna2 Spectrin alpha chain, brain (OMCL_OG2_71149); ENSMUSG00000011751 Spnb4 spectrin beta 4 (OMCL_OG2_71149); ENSMUSG00000020315 Spnb2 Spectrin beta chain, brain 1 (OMCL_OG2_71149); ENSMUSG00000067889 Spnb3 spectrin beta 3 (OMCL_OG2_71149); ENSMUSG00000074899 Spnb5 spectrin beta 5 (OMCL_OG2_71149); ENS…	CG10158	CG10158	PAIN	FBgn0031871	CG10158 CG10158	ENSG00000111790 FGFR1OP2 FGFR1 oncogene partner 2 (HOMG_9222, I, OMCL_OG2_79835)	ENSG00000052723 NP_0793492 suppressor of IKK epsilon isoform 1 (I, COMP); ENSG00000111790 FGFR1OP2 FGFR1 oncogene partner 2 (COMP)	ENSMUSG00000040242 Fgfr1op2 FGFR1 oncogene partner 2 homolog (HOMG_9222, I, OMCL_OG2_79835)	ENSMUSG00000027854 5730470L24Rik Suppressor of IKK-epsilon protein A (I, COMP); ENSMUSG00000040242 Fgfr1op2 FGFR1 oncogene partner 2 homolog (COMP)
CG2052	CG2052	PAIN	FBgn0039905	CG2052 CG2052	-	-	-	-	CG18731	CG18731	BP	FBgn0042213	CG18731 CG18731	-	-	-	-
CG2052	CG2052	PAIN	FBgn0039905	CG2052 CG2052	-	-	-	-	CG6576	CG6576	BP	FBgn0035924	CG6576 CG6576	-	-	-	-
CG2052	CG2052	PAIN	FBgn0039905	CG2052 CG2052	-	-	-	-	CG15109	CG15109	BP	FBgn0034416	CG15109 CG15109	-	-	-	-
CG2052	CG2052	PAIN	FBgn0039905	CG2052 CG2052	-	-	-	-	CG1064	Snr1	BP	FBgn0011715	Snr1 Snf5-related 1 dendrite morphogenesis,regulation of transcription,instar larval or pupal development,positive regulation of transcription, DNA-dependent,embryonic development via the syncytial blastoderm,imaginal disc-derived wing vein specification,chromatin remodeling,epidermis development,muscle development	ENSG00000099956 SMARCB1 SWI/SNF-related matrix-associated actin-dependent regulator of chromatin subfamily B member 1 (HOMG_2310, OMCL_OG2_73917, COMP, I)	-	ENSMUSG00000000902 Smarcb1 SWI/SNF-related matrix-associated actin-dependent regulator of chromatin subfamily B member 1 (HOMG_2310, OMCL_OG2_73917, COMP, I)	-
CG2052	CG2052	PAIN	FBgn0039905	CG2052 CG2052	-	-	-	-	FBgn0021746	Bm	BP	FBgn0021746	Bm Bumpy	-	-	-	-
CG2052	CG2052	PAIN	FBgn0039905	CG2052 CG2052	-	-	-	-	CG4767	Tektin-A	BP	FBgn0028902	Tektin-A Tektin A microtubule-based process,microtubule cytoskeleton organization and biogenesis	ENSG00000163060 TEKT4 Tektin-4 (HOMG_25745, COMP, OMCL_OG2_79979)	-	ENSMUSG00000024175 Tekt4 Tektin-4 (HOMG_25745, COMP, OMCL_OG2_79979)	-
CG2052	CG2052	PAIN	FBgn0039905	CG2052 CG2052	-	-	-	-	CG7570	hale	BP	FBgn0036924	hale hale-bopp biological_process	-	-	-	-
CG2109	mRpL44	PAIN	FBgn0037330	mRpL44 mitochondrial ribosomal protein L44 RNA processing	ENSG00000135900 MRPL44 39S ribosomal protein L44, mitochondrial precursor (COMP, I, OMCL_OG2_78788, HOMG_11293)	-	ENSMUSG00000026248 Mrpl44 39S ribosomal protein L44, mitochondrial precursor (COMP, I, OMCL_OG2_78788, HOMG_11293)	-	CG10694	CG10694	BP	FBgn0039147	CG10694 CG10694 proteasomal ubiquitin-dependent protein catabolic process,protein modification process,base-excision repair,nucleotide-excision repair	-	ENSG00000179262 RAD23A UV excision repair protein RAD23 homolog A (OMCL_OG2_71276); ENSG00000119318 RAD23B UV excision repair protein RAD23 homolog B (OMCL_OG2_71276)	-	ENSMUSG00000028426 Rad23b UV excision repair protein RAD23 homolog B (OMCL_OG2_71276); ENSMUSG00000003813 Rad23a UV excision repair protein RAD23 homolog A (OMCL_OG2_71276)
CG2109	mRpL44	PAIN	FBgn0037330	mRpL44 mitochondrial ribosomal protein L44 RNA processing	ENSG00000135900 MRPL44 39S ribosomal protein L44, mitochondrial precursor (COMP, I, OMCL_OG2_78788, HOMG_11293)	-	ENSMUSG00000026248 Mrpl44 39S ribosomal protein L44, mitochondrial precursor (COMP, I, OMCL_OG2_78788, HOMG_11293)	-	CG3183	geminin	BP	FBgn0033081	geminin geminin regulation of cell cycle,negative regulation of DNA replication,eggshell chorion gene amplification	ENSG00000112312 GMNN Geminin (COMP)	-	ENSMUSG00000006715 Gmnn Geminin (COMP, I)	ENSMUSG00000074651 EG622408 predicted gene, EG622408 , mRNA (I)
CG2109	mRpL44	PAIN	FBgn0037330	mRpL44 mitochondrial ribosomal protein L44 RNA processing	ENSG00000135900 MRPL44 39S ribosomal protein L44, mitochondrial precursor (COMP, I, OMCL_OG2_78788, HOMG_11293)	-	ENSMUSG00000026248 Mrpl44 39S ribosomal protein L44, mitochondrial precursor (COMP, I, OMCL_OG2_78788, HOMG_11293)	-	CG18806	CG18806	BP	FBgn0042129	CG18806 CG18806	-	-	-	-
CG2109	mRpL44	PAIN	FBgn0037330	mRpL44 mitochondrial ribosomal protein L44 RNA processing	ENSG00000135900 MRPL44 39S ribosomal protein L44, mitochondrial precursor (COMP, I, OMCL_OG2_78788, HOMG_11293)	-	ENSMUSG00000026248 Mrpl44 39S ribosomal protein L44, mitochondrial precursor (COMP, I, OMCL_OG2_78788, HOMG_11293)	-	CG31036	CG31036	BP	FBgn0051036	CG31036 CG31036	ENSG00000110427 C11orf41 Putative membrane protein C11orf41 (I)	ENSG00000122778 NP_0659611 \N (I)	-	-
CG2109	mRpL44	PAIN	FBgn0037330	mRpL44 mitochondrial ribosomal protein L44 RNA processing	ENSG00000135900 MRPL44 39S ribosomal protein L44, mitochondrial precursor (COMP, I, OMCL_OG2_78788, HOMG_11293)	-	ENSMUSG00000026248 Mrpl44 39S ribosomal protein L44, mitochondrial precursor (COMP, I, OMCL_OG2_78788, HOMG_11293)	-	CG10388	Ubx	BP	FBgn0003944	Ubx Ultrabithorax regulation of imaginal disc growth,open tracheal system development,imaginal disc-derived leg morphogenesis,specification of organ identity,mesodermal cell fate specification,specification of segmental identity, thorax,regulation of transcription, DNA-dependent,regulation of transcription from RNA polymerase II promoter,haltere development,dorsal vessel aortic cell fate commitme…	-	-	-	-
CG2125	ci	BP	FBgn0004859	ci cubitus interruptus regulation of mitotic cell cycle,neuron development,dendrite morphogenesis,eye morphogenesis,smoothened signaling pathway,regulation of transcription,labial disc development,spiracle morphogenesis, open tracheal system,ovarian follicle cell development,cuticle pattern formation,positive regulation of transcription from RNA polymerase II promoter,wing disc anterior/posterior…	ENSG00000106571 GLI3 Zinc finger protein GLI3 (HOMG_139, I)	ENSG00000074047 GLI2 Zinc finger protein GLI2 (OMCL_OG2_73122, I); ENSG00000106571 GLI3 Zinc finger protein GLI3 (OMCL_OG2_73122); ENSG00000111087 GLI1 Zinc finger protein GLI1 (OMCL_OG2_73122)	ENSMUSG00000021318 Gli3 Zinc finger protein GLI3 (HOMG_139, I); ENSMUSG00000048402 Gli2 GLI-Kruppel family member GLI2 (I)	ENSMUSG00000048402 Gli2 GLI-Kruppel family member GLI2 (OMCL_OG2_73122, I); ENSMUSG00000021318 Gli3 Zinc finger protein GLI3 (OMCL_OG2_73122, I); ENSMUSG00000051835 (OMCL_OG2_73122); ENSMUSG00000025407 Gli1 Zinc finger protein GLI1 (OMCL_OG2_73122)	CG10315	eIF2B-delta	PAIN	FBgn0034858	eIF2B-delta eIF2B-Î´ translational initiation	ENSG00000115211 EIF2B4 Translation initiation factor eIF-2B subunit delta (COMP, I, HOMG_5976, OMCL_OG2_71990)	-	ENSMUSG00000029145 Eif2b4 Translation initiation factor eIF-2B subunit delta (COMP, I, HOMG_5976, OMCL_OG2_71990)	-
CG2125	ci	BP	FBgn0004859	ci cubitus interruptus regulation of mitotic cell cycle,neuron development,dendrite morphogenesis,eye morphogenesis,smoothened signaling pathway,regulation of transcription,labial disc development,spiracle morphogenesis, open tracheal system,ovarian follicle cell development,cuticle pattern formation,positive regulation of transcription from RNA polymerase II promoter,wing disc anterior/posterior…	ENSG00000106571 GLI3 Zinc finger protein GLI3 (HOMG_139, I)	ENSG00000074047 GLI2 Zinc finger protein GLI2 (OMCL_OG2_73122, I); ENSG00000106571 GLI3 Zinc finger protein GLI3 (OMCL_OG2_73122); ENSG00000111087 GLI1 Zinc finger protein GLI1 (OMCL_OG2_73122)	ENSMUSG00000021318 Gli3 Zinc finger protein GLI3 (HOMG_139, I); ENSMUSG00000048402 Gli2 GLI-Kruppel family member GLI2 (I)	ENSMUSG00000048402 Gli2 GLI-Kruppel family member GLI2 (OMCL_OG2_73122, I); ENSMUSG00000021318 Gli3 Zinc finger protein GLI3 (OMCL_OG2_73122, I); ENSMUSG00000051835 (OMCL_OG2_73122); ENSMUSG00000025407 Gli1 Zinc finger protein GLI1 (OMCL_OG2_73122)	CG10228	Pcf11	PAIN	FBgn0022063	Pcf11 Pcf11 mRNA cleavage	ENSG00000165494 PCF11 Pre-mRNA cleavage complex 2 protein Pcf11 (I, OMCL_OG2_73135)	-	ENSMUSG00000041328 Pcf11 pre-mRNA cleavage complex II protein Pcf11 (I, OMCL_OG2_73135)	-
CG2125	ci	BP	FBgn0004859	ci cubitus interruptus regulation of mitotic cell cycle,neuron development,dendrite morphogenesis,eye morphogenesis,smoothened signaling pathway,regulation of transcription,labial disc development,spiracle morphogenesis, open tracheal system,ovarian follicle cell development,cuticle pattern formation,positive regulation of transcription from RNA polymerase II promoter,wing disc anterior/posterior…	ENSG00000106571 GLI3 Zinc finger protein GLI3 (HOMG_139, I)	ENSG00000074047 GLI2 Zinc finger protein GLI2 (OMCL_OG2_73122, I); ENSG00000106571 GLI3 Zinc finger protein GLI3 (OMCL_OG2_73122); ENSG00000111087 GLI1 Zinc finger protein GLI1 (OMCL_OG2_73122)	ENSMUSG00000021318 Gli3 Zinc finger protein GLI3 (HOMG_139, I); ENSMUSG00000048402 Gli2 GLI-Kruppel family member GLI2 (I)	ENSMUSG00000048402 Gli2 GLI-Kruppel family member GLI2 (OMCL_OG2_73122, I); ENSMUSG00000021318 Gli3 Zinc finger protein GLI3 (OMCL_OG2_73122, I); ENSMUSG00000051835 (OMCL_OG2_73122); ENSMUSG00000025407 Gli1 Zinc finger protein GLI1 (OMCL_OG2_73122)	CG3905	Su(z)2	PAIN	FBgn0008654	Su(z)2 Suppressor of zeste 2 metabolic process	-	-	-	-
CG2125	ci	BP	FBgn0004859	ci cubitus interruptus regulation of mitotic cell cycle,neuron development,dendrite morphogenesis,eye morphogenesis,smoothened signaling pathway,regulation of transcription,labial disc development,spiracle morphogenesis, open tracheal system,ovarian follicle cell development,cuticle pattern formation,positive regulation of transcription from RNA polymerase II promoter,wing disc anterior/posterior…	ENSG00000106571 GLI3 Zinc finger protein GLI3 (HOMG_139, I)	ENSG00000074047 GLI2 Zinc finger protein GLI2 (OMCL_OG2_73122, I); ENSG00000106571 GLI3 Zinc finger protein GLI3 (OMCL_OG2_73122); ENSG00000111087 GLI1 Zinc finger protein GLI1 (OMCL_OG2_73122)	ENSMUSG00000021318 Gli3 Zinc finger protein GLI3 (HOMG_139, I); ENSMUSG00000048402 Gli2 GLI-Kruppel family member GLI2 (I)	ENSMUSG00000048402 Gli2 GLI-Kruppel family member GLI2 (OMCL_OG2_73122, I); ENSMUSG00000021318 Gli3 Zinc finger protein GLI3 (OMCL_OG2_73122, I); ENSMUSG00000051835 (OMCL_OG2_73122); ENSMUSG00000025407 Gli1 Zinc finger protein GLI1 (OMCL_OG2_73122)	CG6703	Caki	PAIN	FBgn0013759	Caki Calcium/calmodulin-dependent protein kinase regulation of cell shape,adult walking behavior,protein amino acid phosphorylation,cell adhesion,synaptic vesicle docking during exocytosis,establishment and/or maintenance of cell polarity,neurotransmitter secretion,synaptic vesicle targeting	ENSG00000147044 CASK Peripheral plasma membrane protein CASK (HOMG_2736, OMCL_OG2_77314, I); ENSG00000130830 MPP1 55 kDa erythrocyte membrane protein (COMP)	-	ENSMUSG00000031012 Cask Peripheral plasma membrane protein CASK (HOMG_2736, OMCL_OG2_77314, I); ENSMUSG00000031402 Mpp1 55 kDa erythrocyte membrane protein (COMP)	-
CG2125	ci	BP	FBgn0004859	ci cubitus interruptus regulation of mitotic cell cycle,neuron development,dendrite morphogenesis,eye morphogenesis,smoothened signaling pathway,regulation of transcription,labial disc development,spiracle morphogenesis, open tracheal system,ovarian follicle cell development,cuticle pattern formation,positive regulation of transcription from RNA polymerase II promoter,wing disc anterior/posterior…	ENSG00000106571 GLI3 Zinc finger protein GLI3 (HOMG_139, I)	ENSG00000074047 GLI2 Zinc finger protein GLI2 (OMCL_OG2_73122, I); ENSG00000106571 GLI3 Zinc finger protein GLI3 (OMCL_OG2_73122); ENSG00000111087 GLI1 Zinc finger protein GLI1 (OMCL_OG2_73122)	ENSMUSG00000021318 Gli3 Zinc finger protein GLI3 (HOMG_139, I); ENSMUSG00000048402 Gli2 GLI-Kruppel family member GLI2 (I)	ENSMUSG00000048402 Gli2 GLI-Kruppel family member GLI2 (OMCL_OG2_73122, I); ENSMUSG00000021318 Gli3 Zinc finger protein GLI3 (OMCL_OG2_73122, I); ENSMUSG00000051835 (OMCL_OG2_73122); ENSMUSG00000025407 Gli1 Zinc finger protein GLI1 (OMCL_OG2_73122)	CG34401	CG34401	PAIN	FBgn0085430	CG34401	ENSG00000214655 KIAA0913 \N (COMP); 23053 KIAA0913 (HOMG_34313); ENSG00000162415 ZSWIM5 Zinc finger SWIM domain-containing protein 5 (I)	ENSG00000130449 ZSWIM6 Zinc finger SWIM domain-containing protein 6 (I); ENSG00000132003 ZSWIM4 Zinc finger SWIM domain-containing protein 4 (I)	ENSMUSG00000021819 2310021P13Rik Zinc finger SWIM domain-containing protein KIAA0913 (HOMG_34313, COMP, I, OMCL_OG2_76846)	-
CG2125	ci	BP	FBgn0004859	ci cubitus interruptus regulation of mitotic cell cycle,neuron development,dendrite morphogenesis,eye morphogenesis,smoothened signaling pathway,regulation of transcription,labial disc development,spiracle morphogenesis, open tracheal system,ovarian follicle cell development,cuticle pattern formation,positive regulation of transcription from RNA polymerase II promoter,wing disc anterior/posterior…	ENSG00000106571 GLI3 Zinc finger protein GLI3 (HOMG_139, I)	ENSG00000074047 GLI2 Zinc finger protein GLI2 (OMCL_OG2_73122, I); ENSG00000106571 GLI3 Zinc finger protein GLI3 (OMCL_OG2_73122); ENSG00000111087 GLI1 Zinc finger protein GLI1 (OMCL_OG2_73122)	ENSMUSG00000021318 Gli3 Zinc finger protein GLI3 (HOMG_139, I); ENSMUSG00000048402 Gli2 GLI-Kruppel family member GLI2 (I)	ENSMUSG00000048402 Gli2 GLI-Kruppel family member GLI2 (OMCL_OG2_73122, I); ENSMUSG00000021318 Gli3 Zinc finger protein GLI3 (OMCL_OG2_73122, I); ENSMUSG00000051835 (OMCL_OG2_73122); ENSMUSG00000025407 Gli1 Zinc finger protein GLI1 (OMCL_OG2_73122)	CG8487	garz	PAIN	FBgn0033714	garz gartenzwerg phagocytosis, engulfment,ER to Golgi vesicle-mediated transport,intra-Golgi vesicle-mediated transport,regulation of ARF protein signal transduction	ENSG00000107862 GBF1 Golgi-specific brefeldin A-resistance guanine nucleotide exchange factor 1 (HOMG_37897, COMP, I, OMCL_OG2_73056)	-	ENSMUSG00000025224 Gbf1 golgi-specific brefeldin A-resistance factor 1 (HOMG_37897, COMP, I, OMCL_OG2_73056)	-
CG2125	ci	BP	FBgn0004859	ci cubitus interruptus regulation of mitotic cell cycle,neuron development,dendrite morphogenesis,eye morphogenesis,smoothened signaling pathway,regulation of transcription,labial disc development,spiracle morphogenesis, open tracheal system,ovarian follicle cell development,cuticle pattern formation,positive regulation of transcription from RNA polymerase II promoter,wing disc anterior/posterior…	ENSG00000106571 GLI3 Zinc finger protein GLI3 (HOMG_139, I)	ENSG00000074047 GLI2 Zinc finger protein GLI2 (OMCL_OG2_73122, I); ENSG00000106571 GLI3 Zinc finger protein GLI3 (OMCL_OG2_73122); ENSG00000111087 GLI1 Zinc finger protein GLI1 (OMCL_OG2_73122)	ENSMUSG00000021318 Gli3 Zinc finger protein GLI3 (HOMG_139, I); ENSMUSG00000048402 Gli2 GLI-Kruppel family member GLI2 (I)	ENSMUSG00000048402 Gli2 GLI-Kruppel family member GLI2 (OMCL_OG2_73122, I); ENSMUSG00000021318 Gli3 Zinc finger protein GLI3 (OMCL_OG2_73122, I); ENSMUSG00000051835 (OMCL_OG2_73122); ENSMUSG00000025407 Gli1 Zinc finger protein GLI1 (OMCL_OG2_73122)	CG6673	CG6673	PAIN	FBgn0035906	CG6673 CG6673 response to oxidative stress,metabolic process,determination of adult life span	-	ENSG00000148834 GSTO1 Glutathione transferase omega-1 (OMCL_OG2_73472, COMP, I); ENSG00000186110 \N \N (OMCL_OG2_73472, I); ENSG00000065621 GSTO2 Glutathione transferase omega-2 (COMP, I)	-	ENSMUSG00000025068 Gsto1 Glutathione transferase omega-1 (OMCL_OG2_73472, COMP, I); ENSMUSG00000025069 Gsto2 Glutathione transferase omega-2 (COMP, I)
CG2125	ci	BP	FBgn0004859	ci cubitus interruptus regulation of mitotic cell cycle,neuron development,dendrite morphogenesis,eye morphogenesis,smoothened signaling pathway,regulation of transcription,labial disc development,spiracle morphogenesis, open tracheal system,ovarian follicle cell development,cuticle pattern formation,positive regulation of transcription from RNA polymerase II promoter,wing disc anterior/posterior…	ENSG00000106571 GLI3 Zinc finger protein GLI3 (HOMG_139, I)	ENSG00000074047 GLI2 Zinc finger protein GLI2 (OMCL_OG2_73122, I); ENSG00000106571 GLI3 Zinc finger protein GLI3 (OMCL_OG2_73122); ENSG00000111087 GLI1 Zinc finger protein GLI1 (OMCL_OG2_73122)	ENSMUSG00000021318 Gli3 Zinc finger protein GLI3 (HOMG_139, I); ENSMUSG00000048402 Gli2 GLI-Kruppel family member GLI2 (I)	ENSMUSG00000048402 Gli2 GLI-Kruppel family member GLI2 (OMCL_OG2_73122, I); ENSMUSG00000021318 Gli3 Zinc finger protein GLI3 (OMCL_OG2_73122, I); ENSMUSG00000051835 (OMCL_OG2_73122); ENSMUSG00000025407 Gli1 Zinc finger protein GLI1 (OMCL_OG2_73122)	CG12785	CG12785	PAIN	FBgn0038410	CG12785 CG12785 proteolysis	ENSG00000165271 NOL6 Nucleolar protein 6 (OMCL_OG2_73036, HOMG_41505, COMP, I)	-	ENSMUSG00000028430 Nol6 Nucleolar protein 6 (OMCL_OG2_73036, HOMG_41505, COMP, I)	-
CG2151	Trxr-1	PAIN	FBgn0020653	Trxr-1 Thioredoxin reductase-1 electron transport,determination of adult life span,cell redox homeostasis	ENSG00000211449 (HOMG_55733); ENSG00000184470 TXNRD2 Thioredoxin reductase 2, mitochondrial precursor (I)	ENSG00000184470 TXNRD2 Thioredoxin reductase 2, mitochondrial precursor (OMCL_OG2_70822, COMP); ENSG00000211449 (OMCL_OG2_70822); ENSG00000104687 GSR Glutathione reductase, mitochondrial precursor (OMCL_OG2_70822); ENSG00000198431 TXNRD1 Thioredoxin reductase 1, cytoplasmic precursor (OMCL_OG2_70822); ENSG00000197763 TXNRD3 Thioredoxin reductase 3 (OMCL_OG2_70822)	ENSMUSG00000075704 Txnrd2 Thioredoxin reductase 2, mitochondrial precursor (I); ENSMUSG00000020250 Txnrd1 Thioredoxin reductase 1, cytoplasmic (HOMG_55733)	ENSMUSG00000075704 Txnrd2 Thioredoxin reductase 2, mitochondrial precursor (OMCL_OG2_70822, COMP); ENSMUSG00000000811 Txnrd3 thioredoxin reductase 3 (OMCL_OG2_70822); ENSMUSG00000031584 Gsr Glutathione reductase, mitochondrial precursor (OMCL_OG2_70822); ENSMUSG00000020250 Txnrd1 Thioredoxin reductase 1, cytoplasmic (OMCL_OG2_70822)	CG12085	pUf68	BP	FBgn0028577	pUf68 poly U binding factor 68kD cystoblast division,regulation of cell cycle,nuclear mRNA splicing, via spliceosome,regulation of alternative nuclear mRNA splicing, via spliceosome,alternative nuclear mRNA splicing, via spliceosome,mRNA splice site selection	ENSG00000179950 PUF60 poly-U binding splicing factor 60KDa isoform b (OMCL_OG2_75077, COMP, I); 22827 PUF60 (HOMG_8614)	-	ENSMUSG00000002524 Puf60 Poly-binding-splicing factor PUF60 -binding-splicing factor (OMCL_OG2_75077, COMP, I, HOMG_8614)	-
CG2151	Trxr-1	PAIN	FBgn0020653	Trxr-1 Thioredoxin reductase-1 electron transport,determination of adult life span,cell redox homeostasis	ENSG00000211449 (HOMG_55733); ENSG00000184470 TXNRD2 Thioredoxin reductase 2, mitochondrial precursor (I)	ENSG00000184470 TXNRD2 Thioredoxin reductase 2, mitochondrial precursor (OMCL_OG2_70822, COMP); ENSG00000211449 (OMCL_OG2_70822); ENSG00000104687 GSR Glutathione reductase, mitochondrial precursor (OMCL_OG2_70822); ENSG00000198431 TXNRD1 Thioredoxin reductase 1, cytoplasmic precursor (OMCL_OG2_70822); ENSG00000197763 TXNRD3 Thioredoxin reductase 3 (OMCL_OG2_70822)	ENSMUSG00000075704 Txnrd2 Thioredoxin reductase 2, mitochondrial precursor (I); ENSMUSG00000020250 Txnrd1 Thioredoxin reductase 1, cytoplasmic (HOMG_55733)	ENSMUSG00000075704 Txnrd2 Thioredoxin reductase 2, mitochondrial precursor (OMCL_OG2_70822, COMP); ENSMUSG00000000811 Txnrd3 thioredoxin reductase 3 (OMCL_OG2_70822); ENSMUSG00000031584 Gsr Glutathione reductase, mitochondrial precursor (OMCL_OG2_70822); ENSMUSG00000020250 Txnrd1 Thioredoxin reductase 1, cytoplasmic (OMCL_OG2_70822)	CG13512	CG13512	BP	FBgn0034760	CG13512 CG13512	-	-	-	-
CG2158	CG2158	PAIN	FBgn0033264	CG2158 CG2158 phagocytosis, engulfment,intracellular transport	ENSG00000093000 NUP50 Nucleoporin 50 kDa (HOMG_5190, COMP, I)	ENSG00000189235 \N \N (I, OMCL_OG2_76535); ENSG00000093000 NUP50 Nucleoporin 50 kDa (OMCL_OG2_76535)	ENSMUSG00000016619 Nup50 Nucleoporin 50 kDa (HOMG_5190, I, OMCL_OG2_76535)	ENSMUSG00000072878 1700123L14Rik RIKEN cDNA 1700123L14 gene on chromosome 6 (I, COMP); ENSMUSG00000016619 Nup50 Nucleoporin 50 kDa (COMP)	CG1242	Hsp83	BP	FBgn0001233	Hsp83 Heat shock protein 83 regulation of cell shape,determination of anterior/posterior axis, embryo,centrosome cycle,protein folding,spermatogenesis,torso signaling pathway,R7 cell fate commitment,actin filament organization,response to heat,mitotic spindle organization and biogenesis,regulation of circadian sleep/wake cycle, sleep	ENSG00000080824 HSP90AA2 Heat shock protein HSP 90-alpha (HOMG_68464, I)	ENSG00000096384 HSP90AB1 Heat shock protein HSP 90-beta (OMCL_OG2_70698, I, COMP); ENSG00000205527 HSP90AB4P heat shock protein 90kDa alpha , class B member 4 on chromosome 15 (OMCL_OG2_70698, COMP); ENSG00000183199 Q58FF7_HUMAN Heat shock protein 90Bc (OMCL_OG2_70698, COMP); ENSG00000080824 HSP90AA2 Heat shock protein HSP 90-alpha (OMCL_OG2_70698, COMP); ENSG00000205141 HSP90B2P Heat shock prote…	ENSMUSG00000021270 Hsp90aa1 Heat shock protein HSP 90-alpha (HOMG_68464, I)	ENSMUSG00000023944 Hsp90ab1 Heat shock protein HSP 90-beta (OMCL_OG2_70698, I, COMP); ENSMUSG00000021270 Hsp90aa1 Heat shock protein HSP 90-alpha (OMCL_OG2_70698, COMP); ENSMUSG00000043566 (OMCL_OG2_70698); ENSMUSG00000020048 Hsp90b1 Endoplasmin precursor (OMCL_OG2_70698); ENSMUSG00000048570 (OMCL_OG2_70698)
CG2158	CG2158	PAIN	FBgn0033264	CG2158 CG2158 phagocytosis, engulfment,intracellular transport	ENSG00000093000 NUP50 Nucleoporin 50 kDa (HOMG_5190, COMP, I)	ENSG00000189235 \N \N (I, OMCL_OG2_76535); ENSG00000093000 NUP50 Nucleoporin 50 kDa (OMCL_OG2_76535)	ENSMUSG00000016619 Nup50 Nucleoporin 50 kDa (HOMG_5190, I, OMCL_OG2_76535)	ENSMUSG00000072878 1700123L14Rik RIKEN cDNA 1700123L14 gene on chromosome 6 (I, COMP); ENSMUSG00000016619 Nup50 Nucleoporin 50 kDa (COMP)	CG3114	ewg	BP	FBgn0005427	ewg erect wing central nervous system development,imaginal disc morphogenesis,muscle development	ENSG00000106459 NRF1 Nuclear respiratory factor 1 (OMCL_OG2_80522, COMP, I)	-	ENSMUSG00000058440 Nrf1 Nuclear respiratory factor 1 (OMCL_OG2_80522, COMP, I)	-
CG2199	CG2199	BP	FBgn0035213	CG2199 CG2199	-	-	-	-	CG15167	CG15167	PAIN	FBgn0032709	CG15167 CG15167	-	-	-	-
CG2216	Fer1HCH	BP	FBgn0015222	Fer1HCH Ferritin 1 heavy chain homologue cellular iron ion homeostasis,iron ion transport	-	ENSG00000167996 FTH1 Ferritin heavy chain (OMCL_OG2_72074)	-	ENSMUSG00000024661 Fth1 Ferritin heavy chain (OMCL_OG2_72074)	CG15071	CG15071	PAIN	FBgn0034377	CG15071 CG15071	-	-	-	-
CG2224	CG2224	BP	FBgn0039773	CG2224 CG2224	ENSG00000124356 STAMBP STAM-binding protein (OMCL_OG2_75796, I)	ENSG00000138134 STAMBPL1 AMSH-like protease (I, COMP); ENSG00000124356 STAMBP STAM-binding protein (COMP)	ENSMUSG00000006906 Stambp STAM-binding protein (OMCL_OG2_75796, I)	ENSMUSG00000024776 Stambpl1 AMSH-like protease (I, COMP); ENSMUSG00000006906 Stambp STAM-binding protein (COMP)	CG1966	Acf1	PAIN	FBgn0027620	Acf1 ATP-dependent chromatin assembly factor large subunit nucleosome positioning,chromatin assembly or disassembly,neuron development,dendrite morphogenesis,regulation of transcription, DNA-dependent,nucleosome mobilization,nucleosome assembly,muscle development,epidermis development	ENSG00000198604 BAZ1A Bromodomain adjacent to zinc finger domain protein 1A WCRF18 (HOMG_45654, I, OMCL_OG2_78483)	-	ENSMUSG00000035021 Baz1a Bromodomain adjacent to zinc finger domain protein 1A (HOMG_45654, I, OMCL_OG2_78483)	-
CG2248	Rac1	BP	FBgn0010333	Rac1 Rac1 open tracheal system development,border follicle cell migration,phagocytosis, engulfment,imaginal disc-derived wing hair site selection,dendrite morphogenesis,regulation of axonogenesis,axonogenesis,axon extension,rhabdomere development,hemocyte development,dorsal closure,hemocyte migration,intercellular junction assembly and maintenance,peripheral nervous system development,establishme…	ENSG00000169750 RAC3 Ras-related C3 botulinum toxin substrate 3 precursor (I, HOMG_68433); ENSG00000128340 RAC2 Ras-related C3 botulinum toxin substrate 2 precursor (I)	ENSG00000136238 RAC1 Ras-related C3 botulinum toxin substrate 1 precursor (COMP, I, OMCL_OG2_71737); ENSG00000169750 RAC3 Ras-related C3 botulinum toxin substrate 3 precursor (COMP, OMCL_OG2_71737); ENSG00000172895 \N \N (I, OMCL_OG2_71737); ENSG00000128340 RAC2 Ras-related C3 botulinum toxin substrate 2 precursor (COMP, OMCL_OG2_71737)	ENSMUSG00000018012 Rac3 Ras-related C3 botulinum toxin substrate 3 precursor (I, HOMG_68433); ENSMUSG00000001847 Rac1 Ras-related C3 botulinum toxin substrate 1 precursor (I)	ENSMUSG00000033220 Rac2 Ras-related C3 botulinum toxin substrate 2 precursor (COMP, I, OMCL_OG2_71737); ENSMUSG00000001847 Rac1 Ras-related C3 botulinum toxin substrate 1 precursor (COMP, I, OMCL_OG2_71737); ENSMUSG00000018012 Rac3 Ras-related C3 botulinum toxin substrate 3 precursor (COMP, I, OMCL_OG2_71737)	CG5884	par-6	PAIN	FBgn0026192	par-6 par-6 establishment and/or maintenance of neuroblast polarity,border follicle cell migration,synaptogenesis,regulation of cell shape,phagocytosis, engulfment,zonula adherens assembly,morphogenesis of a polarized epithelium,oocyte axis determination,cell adhesion,apical protein localization,establishment and/or maintenance of polarity of embryonic epithelium,establishment and/or maintenance …	ENSG00000178184 PARD6G Partitioning defective 6 homolog gamma (HOMG_36487); ENSG00000124171 PARD6B Partitioning defective 6 homolog beta (I)	ENSG00000178184 PARD6G Partitioning defective 6 homolog gamma (I, COMP, OMCL_OG2_75976); ENSG00000102981 PARD6A Partitioning defective 6 homolog alpha (I, COMP); ENSG00000124171 PARD6B Partitioning defective 6 homolog beta (COMP, OMCL_OG2_75976)	ENSMUSG00000056214 Pard6g Partitioning defective 6 homolog gamma (HOMG_36487, I)	ENSMUSG00000044641 Pard6b Partitioning defective 6 homolog beta (I, COMP, OMCL_OG2_75976); ENSMUSG00000056214 Pard6g Partitioning defective 6 homolog gamma (COMP, OMCL_OG2_75976); ENSMUSG00000005699 Pard6a Partitioning defective 6 homolog alpha (COMP)
CG2257	Ubc-E2H	PAIN	FBgn0029996	Ubc-E2H Ubc-E2H regulation of protein metabolic process,post-translational protein modification	ENSG00000186591 UBE2H Ubiquitin-conjugating enzyme E2 H (HOMG_103894, COMP, I, OMCL_OG2_72453)	-	ENSMUSG00000039159 Ube2h Ubiquitin-conjugating enzyme E2 H (HOMG_103894, I, OMCL_OG2_72453)	ENSMUSG00000039159 Ube2h Ubiquitin-conjugating enzyme E2 H (COMP); ENSMUSG00000074903 \N \N (COMP)	CG1894	CG1894	BP	FBgn0039585	CG1894 CG1894	-	-	-	-
CG2257	Ubc-E2H	PAIN	FBgn0029996	Ubc-E2H Ubc-E2H regulation of protein metabolic process,post-translational protein modification	ENSG00000186591 UBE2H Ubiquitin-conjugating enzyme E2 H (HOMG_103894, COMP, I, OMCL_OG2_72453)	-	ENSMUSG00000039159 Ube2h Ubiquitin-conjugating enzyme E2 H (HOMG_103894, I, OMCL_OG2_72453)	ENSMUSG00000039159 Ube2h Ubiquitin-conjugating enzyme E2 H (COMP); ENSMUSG00000074903 \N \N (COMP)	CG13811	CG13811	BP	FBgn0036944	CG13811 CG13811	-	-	-	-
CG2257	Ubc-E2H	PAIN	FBgn0029996	Ubc-E2H Ubc-E2H regulation of protein metabolic process,post-translational protein modification	ENSG00000186591 UBE2H Ubiquitin-conjugating enzyme E2 H (HOMG_103894, COMP, I, OMCL_OG2_72453)	-	ENSMUSG00000039159 Ube2h Ubiquitin-conjugating enzyme E2 H (HOMG_103894, I, OMCL_OG2_72453)	ENSMUSG00000039159 Ube2h Ubiquitin-conjugating enzyme E2 H (COMP); ENSMUSG00000074903 \N \N (COMP)	CG15631	CG15631	BP	FBgn0031626	CG15631 CG15631	-	-	-	-
CG2257	Ubc-E2H	PAIN	FBgn0029996	Ubc-E2H Ubc-E2H regulation of protein metabolic process,post-translational protein modification	ENSG00000186591 UBE2H Ubiquitin-conjugating enzyme E2 H (HOMG_103894, COMP, I, OMCL_OG2_72453)	-	ENSMUSG00000039159 Ube2h Ubiquitin-conjugating enzyme E2 H (HOMG_103894, I, OMCL_OG2_72453)	ENSMUSG00000039159 Ube2h Ubiquitin-conjugating enzyme E2 H (COMP); ENSMUSG00000074903 \N \N (COMP)	CG2199	CG2199	BP	FBgn0035213	CG2199 CG2199	-	-	-	-
CG2286	ND75	PAIN	FBgn0017566	ND75 NADH:ubiquinone reductase 75kD subunit precursor ATP synthesis coupled electron transport	ENSG00000023228 NDUFS1 NADH-ubiquinone oxidoreductase 75 kDa subunit, mitochondrial precursor (HOMG_3670, COMP, I, OMCL_OG2_71940)	-	ENSMUSG00000025968 Ndufs1 NADH-ubiquinone oxidoreductase 75 kDa subunit, mitochondrial precursor (HOMG_3670, COMP, I, OMCL_OG2_71940)	-	CG10103	CG10103	BP	FBgn0035715	CG10103 CG10103	ENSG00000182149 KIAA0174 Uncharacterized protein KIAA0174 (OMCL_OG2_72950, COMP, I, HOMG_8849)	-	ENSMUSG00000031729 2400003C14Rik Uncharacterized protein KIAA0174 (OMCL_OG2_72950, COMP, I, HOMG_8849)	-
CG2286	ND75	PAIN	FBgn0017566	ND75 NADH:ubiquinone reductase 75kD subunit precursor ATP synthesis coupled electron transport	ENSG00000023228 NDUFS1 NADH-ubiquinone oxidoreductase 75 kDa subunit, mitochondrial precursor (HOMG_3670, COMP, I, OMCL_OG2_71940)	-	ENSMUSG00000025968 Ndufs1 NADH-ubiquinone oxidoreductase 75 kDa subunit, mitochondrial precursor (HOMG_3670, COMP, I, OMCL_OG2_71940)	-	CG7352	CG7352	BP	FBgn0037581	CG7352 CG7352	ENSG00000138587 MNS1 meiosis-specific nuclear structural 1 (OMCL_OG2_75133)	-	ENSMUSG00000032221 Mns1 Meiosis-specific nuclear structural protein 1 (I, OMCL_OG2_75133)	-
CG2286	ND75	PAIN	FBgn0017566	ND75 NADH:ubiquinone reductase 75kD subunit precursor ATP synthesis coupled electron transport	ENSG00000023228 NDUFS1 NADH-ubiquinone oxidoreductase 75 kDa subunit, mitochondrial precursor (HOMG_3670, COMP, I, OMCL_OG2_71940)	-	ENSMUSG00000025968 Ndufs1 NADH-ubiquinone oxidoreductase 75 kDa subunit, mitochondrial precursor (HOMG_3670, COMP, I, OMCL_OG2_71940)	-	CG3085	CG3085	BP	FBgn0034816	CG3085 CG3085 microtubule cytoskeleton organization and biogenesis	ENSG00000092850 TEKT2 Tektin-2 (HOMG_8043, OMCL_OG2_80669, COMP, I)	-	ENSMUSG00000028845 Tekt2 Tektin-2 (HOMG_8043, OMCL_OG2_80669, COMP, I)	-
CG2371	CG2371	PAIN	FBgn0030323	CG2371 CG2371	ENSG00000145781 COMMD10 COMM domain-containing protein 10 (OMCL_OG2_80120, COMP, I)	-	ENSMUSG00000042705 Commd10 COMM domain-containing protein 10 (OMCL_OG2_80120, COMP, I)	-	CG10305	RpS26	BP	FBgn0004413	RpS26 Ribosomal protein S26 translation	ENSG00000196656 RPS26 40S ribosomal protein S26 (I); ENSG00000197728 RS26_HUMAN 40S ribosomal protein S26 (I)	ENSG00000170847 RPS26P10 40S ribosomal protein S26-like on chromosome 13 (I, COMP); ENSG00000204652 \N \N (I, OMCL_OG2_71387); ENSG00000173534 Q75MH1_HUMAN Ribosomal protein S26 (I, COMP); ENSG00000196656 RPS26 40S ribosomal protein S26 (COMP, OMCL_OG2_71387); ENSG00000197728 RS26_HUMAN 40S ribosomal protein S26 (COMP, OMCL_OG2_71387); ENSG00000196933 RPS26L1 40S ribosomal protein S26-like 1 (I, …	ENSMUSG00000025362 Rps26 40S ribosomal protein S26 (I, HOMG_37420); ENSMUSG00000059775 Rps26 40S ribosomal protein S26 (I); MGI:1351628 Rps26 ribosomal protein S26 (I)	ENSMUSG00000059775 Rps26 40S ribosomal protein S26 (COMP, OMCL_OG2_71387); ENSMUSG00000025362 Rps26 40S ribosomal protein S26 (COMP, OMCL_OG2_71387); MGI:3648118 EG626175 predicted gene, EG626175 (I)
CG2371	CG2371	PAIN	FBgn0030323	CG2371 CG2371	ENSG00000145781 COMMD10 COMM domain-containing protein 10 (OMCL_OG2_80120, COMP, I)	-	ENSMUSG00000042705 Commd10 COMM domain-containing protein 10 (OMCL_OG2_80120, COMP, I)	-	CG3052	HLH4C	BP	FBgn0011277	HLH4C Helix loop helix protein 4C regulation of transcription	ENSG00000171786 NHLH1 Helix-loop-helix protein 1 (HOMG_4089, I)	ENSG00000177551 NHLH2 Helix-loop-helix protein 2 (OMCL_OG2_78258, I, COMP); ENSG00000171786 NHLH1 Helix-loop-helix protein 1 (OMCL_OG2_78258, COMP)	ENSMUSG00000051251 Nhlh1 Helix-loop-helix protein 1 (HOMG_4089, I); MGI:98481 Nhlh1 nescient helix loop helix 1 (I)	ENSMUSG00000048540 Nhlh2 Helix-loop-helix protein 2 (OMCL_OG2_78258, I, COMP); ENSMUSG00000051251 Nhlh1 Helix-loop-helix protein 1 (OMCL_OG2_78258, COMP)
CG2522	Gtp-bp	PAIN	FBgn0010391	Gtp-bp GTP-binding protein regulation of protein secretion,axonogenesis,SRP-dependent cotranslational protein targeting to membrane	ENSG00000182934 SRPR Signal recognition particle receptor subunit alpha (OMCL_OG2_71654, COMP, I, HOMG_2364)	-	ENSMUSG00000032042 Srpr Signal recognition particle receptor subunit alpha (OMCL_OG2_71654, COMP, I, HOMG_2364)	-	CG8155	CG8155	BP	FBgn0034009	CG8155 CG8155 regulation of Rab GTPase activity	ENSG00000068354 TBC1D25 TBC1 domain family member 25 (HOMG_16173, COMP, OMCL_OG2_79804, I)	-	ENSMUSG00000039201 Tbc1d25 TBC1 domain family member 25 (HOMG_16173, COMP, I, OMCL_OG2_79804)	-
CG2522	Gtp-bp	PAIN	FBgn0010391	Gtp-bp GTP-binding protein regulation of protein secretion,axonogenesis,SRP-dependent cotranslational protein targeting to membrane	ENSG00000182934 SRPR Signal recognition particle receptor subunit alpha (OMCL_OG2_71654, COMP, I, HOMG_2364)	-	ENSMUSG00000032042 Srpr Signal recognition particle receptor subunit alpha (OMCL_OG2_71654, COMP, I, HOMG_2364)	-	CG14534	CG14534	BP	FBgn0031957	TwdlE TweedleE	-	-	-	-
CG2522	Gtp-bp	PAIN	FBgn0010391	Gtp-bp GTP-binding protein regulation of protein secretion,axonogenesis,SRP-dependent cotranslational protein targeting to membrane	ENSG00000182934 SRPR Signal recognition particle receptor subunit alpha (OMCL_OG2_71654, COMP, I, HOMG_2364)	-	ENSMUSG00000032042 Srpr Signal recognition particle receptor subunit alpha (OMCL_OG2_71654, COMP, I, HOMG_2364)	-	CG3758	esg	BP	FBgn0001981	esg escargot asymmetric neuroblast division,open tracheal system development,regulation of transcription from RNA polymerase II promoter,peripheral nervous system development,fusion cell fate specification,regulation of compound eye pigmentation,electron transport,maintenance of imaginal histoblast diploidy,branch fusion, open tracheal system,olfactory behavior	ENSG00000019549 SNAI2 Zinc finger protein SLUG (HOMG_31127, I)	ENSG00000019549 SNAI2 Zinc finger protein SLUG (OMCL_OG2_78703)	ENSMUSG00000022676 Snai2 Zinc finger protein SLUG (HOMG_31127, I); ENSMUSG00000060257 Scrt2 Transcriptional repressor scratch 2 (I)	ENSMUSG00000048385 Scrt1 Transcriptional repressor scratch 1 (I); ENSMUSG00000022676 Snai2 Zinc finger protein SLUG (OMCL_OG2_78703)
CG2522	Gtp-bp	PAIN	FBgn0010391	Gtp-bp GTP-binding protein regulation of protein secretion,axonogenesis,SRP-dependent cotranslational protein targeting to membrane	ENSG00000182934 SRPR Signal recognition particle receptor subunit alpha (OMCL_OG2_71654, COMP, I, HOMG_2364)	-	ENSMUSG00000032042 Srpr Signal recognition particle receptor subunit alpha (OMCL_OG2_71654, COMP, I, HOMG_2364)	-	CG33017	CG33017	BP	FBgn0053017	CG33017 CG33017	-	-	-	-
CG2670	Taf7	BP	FBgn0024909	Taf7 TBP-associated factor 7 transcription initiation from RNA polymerase II promoter,regulation of transcription, DNA-dependent,regulation of transcription	ENSG00000178913 TAF7 Transcription initiation factor TFIID subunit 7 55 (I, HOMG_11768)	ENSG00000102387 TAF7L TATA box binding protein-associated factor, RNA polymerase II, Q (OMCL_OG2_72871, I, COMP); ENSG00000178913 TAF7 Transcription initiation factor TFIID subunit 7 55 (OMCL_OG2_72871, COMP)	ENSMUSG00000051316 Taf7 Transcription initiation factor TFIID subunit 7 55 (I, HOMG_11768)	ENSMUSG00000074734 4933416C03Rik RIKEN cDNA 4933416C03 gene on chromosome 10 (OMCL_OG2_72871, I, COMP); ENSMUSG00000009596 Taf7l Transcription initiation factor TFIID subunit 7-like (I, COMP); ENSMUSG00000051316 Taf7 Transcription initiation factor TFIID subunit 7 55 (OMCL_OG2_72871, COMP)	CG6703	Caki	PAIN	FBgn0013759	Caki Calcium/calmodulin-dependent protein kinase regulation of cell shape,adult walking behavior,protein amino acid phosphorylation,cell adhesion,synaptic vesicle docking during exocytosis,establishment and/or maintenance of cell polarity,neurotransmitter secretion,synaptic vesicle targeting	ENSG00000147044 CASK Peripheral plasma membrane protein CASK (HOMG_2736, OMCL_OG2_77314, I); ENSG00000130830 MPP1 55 kDa erythrocyte membrane protein (COMP)	-	ENSMUSG00000031012 Cask Peripheral plasma membrane protein CASK (HOMG_2736, OMCL_OG2_77314, I); ENSMUSG00000031402 Mpp1 55 kDa erythrocyte membrane protein (COMP)	-
CG2670	Taf7	BP	FBgn0024909	Taf7 TBP-associated factor 7 transcription initiation from RNA polymerase II promoter,regulation of transcription, DNA-dependent,regulation of transcription	ENSG00000178913 TAF7 Transcription initiation factor TFIID subunit 7 55 (I, HOMG_11768)	ENSG00000102387 TAF7L TATA box binding protein-associated factor, RNA polymerase II, Q (OMCL_OG2_72871, I, COMP); ENSG00000178913 TAF7 Transcription initiation factor TFIID subunit 7 55 (OMCL_OG2_72871, COMP)	ENSMUSG00000051316 Taf7 Transcription initiation factor TFIID subunit 7 55 (I, HOMG_11768)	ENSMUSG00000074734 4933416C03Rik RIKEN cDNA 4933416C03 gene on chromosome 10 (OMCL_OG2_72871, I, COMP); ENSMUSG00000009596 Taf7l Transcription initiation factor TFIID subunit 7-like (I, COMP); ENSMUSG00000051316 Taf7 Transcription initiation factor TFIID subunit 7 55 (OMCL_OG2_72871, COMP)	CG32016	CG32016	PAIN	FBgn0052016	CG32016 CG32016	ENSG00000184708 EIF4ENIF1 Eukaryotic translation initiation factor 4E transporter (OMCL_OG2_82543, COMP)	-	ENSMUSG00000020454 Eif4enif1 Eukaryotic translation initiation factor 4E transporter (OMCL_OG2_82543, COMP, I)	-
CG2713	CG2713	PAIN	FBgn0250874	ttm50 tiny tim 50 mitosis,mitochondrion organization and biogenesis	ENSG00000105197 TIMM50 Import inner membrane translocase subunit TIM50, mitochondrial precursor (HOMG_57031, I)	ENSG00000105197 TIMM50 Import inner membrane translocase subunit TIM50, mitochondrial precursor (OMCL_OG2_72726, COMP)	ENSMUSG00000003438 Timm50 Import inner membrane translocase subunit TIM50, mitochondrial precursor (HOMG_57031, I)	ENSMUSG00000003438 Timm50 Import inner membrane translocase subunit TIM50, mitochondrial precursor (OMCL_OG2_72726, COMP)	CG7367	CG7367	BP	FBgn0031976	CG7367 CG7367 phagocytosis, engulfment,lipid metabolic process	-	ENSG00000144837 PLA1A Phospholipase A1 member A precursor (COMP); ENSG00000101670 LIPG Endothelial lipase precursor (COMP); ENSG00000188992 LIPI Lipase member I precursor (COMP); ENSG00000175445 LPL Lipoprotein lipase precursor (COMP); ENSG00000166035 LIPC Hepatic triacylglycerol lipase precursor (COMP); ENSG00000163898 LIPH Lipase member H precursor (COMP)	-	ENSMUSG00000044626 Liph Lipase member H precursor (COMP); ENSMUSG00000053846 Lipg Endothelial lipase precursor (COMP); ENSMUSG00000002847 Pla1a Phospholipase A1 member A precursor (COMP); ENSMUSG00000015568 Lpl Lipoprotein lipase precursor (COMP); ENSMUSG00000032207 Lipc Hepatic triacylglycerol lipase precursor (COMP)
CG2713	CG2713	PAIN	FBgn0250874	ttm50 tiny tim 50 mitosis,mitochondrion organization and biogenesis	ENSG00000105197 TIMM50 Import inner membrane translocase subunit TIM50, mitochondrial precursor (HOMG_57031, I)	ENSG00000105197 TIMM50 Import inner membrane translocase subunit TIM50, mitochondrial precursor (OMCL_OG2_72726, COMP)	ENSMUSG00000003438 Timm50 Import inner membrane translocase subunit TIM50, mitochondrial precursor (HOMG_57031, I)	ENSMUSG00000003438 Timm50 Import inner membrane translocase subunit TIM50, mitochondrial precursor (OMCL_OG2_72726, COMP)	CG1104	CG1104	BP	FBgn0037467	CG1104 CG1104	ENSG00000014123 KIAA0776 Uncharacterized protein KIAA0776 (HOMG_9093, OMCL_OG2_74519, COMP, I)	-	ENSMUSG00000040359 1810074P20Rik Uncharacterized protein KIAA0776 (HOMG_9093, OMCL_OG2_74519, COMP, I)	-
CG2746	RpL19	BP	FBgn0002607	RpL19 Ribosomal protein L19 translation,mitotic spindle elongation	ENSG00000108298 RPL19 60S ribosomal protein L19 (OMCL_OG2_71451, COMP, I); ENSG00000182210 \N \N (HOMG_68105)	ENSG00000182210 \N \N (I)	ENSMUSG00000017404 Rpl19 60S ribosomal protein L19 (COMP, I, HOMG_68105)	ENSMUSG00000047801 (OMCL_OG2_71451); MGI:3646824 EG382844 predicted gene, EG382844 (I); MGI:3644244 (I); ENSMUSG00000017404 Rpl19 60S ribosomal protein L19 (OMCL_OG2_71451); MGI:3645369 EG621988 predicted gene, EG621988 (I)	CG13074	CG13074	PAIN	FBgn0036567	CG13074 CG13074	-	-	-	-
CG2746	RpL19	BP	FBgn0002607	RpL19 Ribosomal protein L19 translation,mitotic spindle elongation	ENSG00000108298 RPL19 60S ribosomal protein L19 (OMCL_OG2_71451, COMP, I); ENSG00000182210 \N \N (HOMG_68105)	ENSG00000182210 \N \N (I)	ENSMUSG00000017404 Rpl19 60S ribosomal protein L19 (COMP, I, HOMG_68105)	ENSMUSG00000047801 (OMCL_OG2_71451); MGI:3646824 EG382844 predicted gene, EG382844 (I); MGI:3644244 (I); ENSMUSG00000017404 Rpl19 60S ribosomal protein L19 (OMCL_OG2_71451); MGI:3645369 EG621988 predicted gene, EG621988 (I)	CG11586	CG11586	PAIN	FBgn0035520	CG11586 CG11586	ENSG00000146007 ZMAT2 Zinc finger matrin-type protein 2 (OMCL_OG2_72955, COMP, I, HOMG_5563)	-	ENSMUSG00000001383 Zmat2 Zinc finger matrin-type protein 2 (OMCL_OG2_72955, COMP, I, HOMG_5563)	-
CG2746	RpL19	BP	FBgn0002607	RpL19 Ribosomal protein L19 translation,mitotic spindle elongation	ENSG00000108298 RPL19 60S ribosomal protein L19 (OMCL_OG2_71451, COMP, I); ENSG00000182210 \N \N (HOMG_68105)	ENSG00000182210 \N \N (I)	ENSMUSG00000017404 Rpl19 60S ribosomal protein L19 (COMP, I, HOMG_68105)	ENSMUSG00000047801 (OMCL_OG2_71451); MGI:3646824 EG382844 predicted gene, EG382844 (I); MGI:3644244 (I); ENSMUSG00000017404 Rpl19 60S ribosomal protein L19 (OMCL_OG2_71451); MGI:3645369 EG621988 predicted gene, EG621988 (I)	CG6998	ctp	PAIN	FBgn0011760	ctp cut up microtubule-based process,actin filament bundle formation,spermatid nuclear elongation,sperm individualization,imaginal disc-derived wing morphogenesis,spermatogenesis,microtubule-based movement,bristle morphogenesis	ENSG00000121083 DYNLL2 Dynein light chain 2, cytoplasmic (HOMG_2777, I)	ENSG00000088986 DYNLL1 Dynein light chain 1, cytoplasmic (OMCL_OG2_71625, COMP); ENSG00000121083 DYNLL2 Dynein light chain 2, cytoplasmic (OMCL_OG2_71625)	ENSMUSG00000020483 Dynll2 Dynein light chain 2, cytoplasmic (HOMG_2777, I)	ENSMUSG00000064063 BC048507 cDNA sequence BC048507 (OMCL_OG2_71625, COMP); ENSMUSG00000009013 Dynll1 Dynein light chain 1, cytoplasmic (OMCL_OG2_71625, COMP); ENSMUSG00000020483 Dynll2 Dynein light chain 2, cytoplasmic (OMCL_OG2_71625)
CG2848	Trn-SR	PAIN	FBgn0031456	Trn-SR Transportin-Serine/Arginine rich mRNA export from nucleus,splicing factor protein import into nucleus,regulation of nuclear mRNA splicing, via spliceosome,protein import into nucleus, docking,regulation of transcription, DNA-dependent,protein import into nucleus	ENSG00000064419 TNPO3 Transportin-3 (HOMG_40848, OMCL_OG2_74009, COMP, I)	-	ENSMUSG00000012535 Tnpo3 Transportin-3 (HOMG_40848, OMCL_OG2_74009, COMP, I)	-	CG8169	Pms2	BP	FBgn0011660	Pms2 Pms2 mismatch repair	ENSG00000122512 PMS2 PMS1 protein homolog 2 (OMCL_OG2_72083, I, HOMG_450)	ENSG00000078319 PMS2L8 PMS2L1 protein (COMP); ENSG00000123965 PMS2L5 postmeiotic segregation increased 2-like 5 (COMP); ENSG00000067601 PMS2L4 PMS6 protein (COMP); ENSG00000188073 PMS2L2 postmeiotic segregation increased 2-like 5 (COMP); ENSG00000174384 NP_7775901 postmeiotic segregation increased 2-like 5 (COMP); ENSG00000189011 NP_7775901 postmeiotic segregation increased 2-like 5 (COMP); ENSG0…	ENSMUSG00000029613 Eif2ak1 Eukaryotic translation initiation factor 2-alpha kinase 1 (OMCL_OG2_72083, HOMG_450); ENSMUSG00000079109 Pms2 PMS1 protein homolog 2 (COMP, I)	-
CG2865	CG2865	BP	FBgn0023526	CG2865 CG2865	-	-	-	-	CG18332	CSN3	PAIN	FBgn0027055	CSN3 COP9 complex homolog subunit 3	ENSG00000141030 COPS3 COP9 signalosome complex subunit 3 (HOMG_2710, COMP, I, OMCL_OG2_74691)	-	ENSMUSG00000019373 Cops3 COP9 signalosome complex subunit 3 (HOMG_2710, COMP, I, OMCL_OG2_74691)	-
CG2865	CG2865	BP	FBgn0023526	CG2865 CG2865	-	-	-	-	CG8203	Cdk5	PAIN	FBgn0013762	Cdk5 Cyclin-dependent kinase 5 synaptic vesicle transport,protein amino acid phosphorylation,cell cycle,neurotransmitter secretion	ENSG00000164885 CDK5 Cell division protein kinase 5 (COMP, I); 1020 CDK5 (HOMG_3623)	ENSG00000170312 CDC2 Cell division control protein 2 homolog (OMCL_OG2_70889); ENSG00000164885 CDK5 Cell division protein kinase 5 (OMCL_OG2_70889); ENSG00000108504 CDK3 Cell division protein kinase 3 (OMCL_OG2_70889); ENSG00000123374 CDK2 Cell division protein kinase 2 (OMCL_OG2_70889)	ENSMUSG00000028969 Cdk5 Cell division protein kinase 5 (HOMG_3623, COMP, I)	ENSMUSG00000019942 Cdc2a Cell division control protein 2 homolog (OMCL_OG2_70889); ENSMUSG00000025358 Cdk2 Cell division protein kinase 2 (OMCL_OG2_70889); ENSMUSG00000034288 Cdk3 Cell division protein kinase 3 (OMCL_OG2_70889); ENSMUSG00000028969 Cdk5 Cell division protein kinase 5 (OMCL_OG2_70889)
CG2865	CG2865	BP	FBgn0023526	CG2865 CG2865	-	-	-	-	CG1152	Gld	PAIN	FBgn0001112	Gld Glucose dehydrogenase sperm storage,pupal chitin-based cuticle development,alcohol metabolic process,glucose metabolic process,cuticle development	-	ENSG00000016391 CHDH Choline dehydrogenase, mitochondrial precursor (OMCL_OG2_70827, I, COMP)	-	ENSMUSG00000015970 Chdh Choline dehydrogenase, mitochondrial precursor (OMCL_OG2_70827, I, COMP)
CG2865	CG2865	BP	FBgn0023526	CG2865 CG2865	-	-	-	-	CG5380	CG5380	PAIN	FBgn0038951	CG5380 CG5380 transcription,transcription from RNA polymerase III promoter	ENSG00000132664 POLR3F DNA-directed RNA polymerase III subunit RPC6 (HOMG_4722, COMP, I, OMCL_OG2_72557)	-	ENSMUSG00000027427 Polr3f DNA-directed RNA polymerase III subunit RPC6 (HOMG_4722, COMP, I, OMCL_OG2_72557)	-
CG2917	Orc4	BP	FBgn0023181	Orc4 Origin recognition complex subunit 4 DNA replication initiation	ENSG00000115947 ORC4L Origin recognition complex subunit 4 (COMP, I, HOMG_8059, OMCL_OG2_73790)	-	ENSMUSG00000026761 Orc4l Origin recognition complex subunit 4 (COMP, I, HOMG_8059, OMCL_OG2_73790)	-	CG9160	mtacp1	PAIN	FBgn0011361	mtacp1 mitochondrial acyl carrier protein 1 mitochondrial electron transport, NADH to ubiquinone,fatty acid biosynthetic process	ENSG00000004779 NDUFAB1 Acyl carrier protein, mitochondrial precursor (OMCL_OG2_70886, COMP, I)	-	ENSMUSG00000030869 Ndufab1 Acyl carrier protein, mitochondrial precursor (OMCL_OG2_70886, COMP, I)	-
CG2917	Orc4	BP	FBgn0023181	Orc4 Origin recognition complex subunit 4 DNA replication initiation	ENSG00000115947 ORC4L Origin recognition complex subunit 4 (COMP, I, HOMG_8059, OMCL_OG2_73790)	-	ENSMUSG00000026761 Orc4l Origin recognition complex subunit 4 (COMP, I, HOMG_8059, OMCL_OG2_73790)	-	CG16932	Eps-15	PAIN	FBgn0035060	Eps-15 Eps-15 vesicle-mediated transport,synaptic vesicle endocytosis,receptor-mediated endocytosis,neurotransmitter secretion	ENSG00000127527 EPS15L1 Epidermal growth factor receptor substrate 15-like 1 (I, HOMG_31881)	ENSG00000085832 EPS15 Epidermal growth factor receptor substrate 15 (OMCL_OG2_72738, I); ENSG00000127527 EPS15L1 Epidermal growth factor receptor substrate 15-like 1 (OMCL_OG2_72738)	ENSMUSG00000006276 Eps15l1 Epidermal growth factor receptor substrate 15-like 1 (I, HOMG_31881)	ENSMUSG00000028552 Eps15 Epidermal growth factor receptor substrate 15 (OMCL_OG2_72738, I); ENSMUSG00000006276 Eps15l1 Epidermal growth factor receptor substrate 15-like 1 (OMCL_OG2_72738)
CG2925	noi	BP	FBgn0014366	noi noisette fertilization,nuclear mRNA splicing, via spliceosome,mitotic spindle organization and biogenesis	ENSG00000183431 SF3A3 Splicing factor 3A subunit 3 (HOMG_4949, COMP, I, OMCL_OG2_72042)	-	ENSMUSG00000028902 Sf3a3 Splicing factor 3A subunit 3 (HOMG_4949, COMP, I)	ENSMUSG00000028902 Sf3a3 Splicing factor 3A subunit 3 (OMCL_OG2_72042); ENSMUSG00000074431 (OMCL_OG2_72042)	CG5519	Gbp	PAIN	FBgn0013969	Gbp GTP-binding-protein protein ubiquitination	ENSG00000110107 PRPF19 Pre-mRNA-processing factor 19 (OMCL_OG2_72274, HOMG_6421, COMP, I)	-	ENSMUSG00000024735 Prpf19 Pre-mRNA-processing factor 19 (OMCL_OG2_72274, HOMG_6421, COMP, I)	-
CG2925	noi	BP	FBgn0014366	noi noisette fertilization,nuclear mRNA splicing, via spliceosome,mitotic spindle organization and biogenesis	ENSG00000183431 SF3A3 Splicing factor 3A subunit 3 (HOMG_4949, COMP, I, OMCL_OG2_72042)	-	ENSMUSG00000028902 Sf3a3 Splicing factor 3A subunit 3 (HOMG_4949, COMP, I)	ENSMUSG00000028902 Sf3a3 Splicing factor 3A subunit 3 (OMCL_OG2_72042); ENSMUSG00000074431 (OMCL_OG2_72042)	CG18332	CSN3	PAIN	FBgn0027055	CSN3 COP9 complex homolog subunit 3	ENSG00000141030 COPS3 COP9 signalosome complex subunit 3 (HOMG_2710, COMP, I, OMCL_OG2_74691)	-	ENSMUSG00000019373 Cops3 COP9 signalosome complex subunit 3 (HOMG_2710, COMP, I, OMCL_OG2_74691)	-
CG2948	rev7	BP	FBgn0037345	rev7 rev7 mitosis,positive regulation of lyase activity	ENSG00000116670 MAD2L2 Mitotic spindle assembly checkpoint protein MAD2B (I, OMCL_OG2_76877)	ENSG00000116670 MAD2L2 Mitotic spindle assembly checkpoint protein MAD2B (COMP); ENSG00000162460 TMEM82 Novel protein (COMP)	ENSMUSG00000029003 Mad2l2 Mitotic spindle assembly checkpoint protein MAD2B (I, OMCL_OG2_76877)	ENSMUSG00000029003 Mad2l2 Mitotic spindle assembly checkpoint protein MAD2B (COMP); ENSMUSG00000043085 Tmem82 Transmembrane protein 82 (COMP)	CG8107	CalpB	PAIN	FBgn0025866	CalpB Calpain-B proteolysis,protein autoprocessing	ENSG00000135773 CAPN9 Calpain-9 (HOMG_38208)	ENSG00000014216 CAPN1 Calpain-1 catalytic subunit (OMCL_OG2_70983, COMP, I); ENSG00000162909 CAPN2 Calpain-2 catalytic subunit precursor (OMCL_OG2_70983, COMP, I); ENSG00000135773 CAPN9 Calpain-9 (OMCL_OG2_70983, COMP, I); ENSG00000137225 CAPN11 Calpain-11 (OMCL_OG2_70983, COMP); ENSG00000203697 CAPN8 Calpain 8 (OMCL_OG2_70983, COMP); ENSG00000182472 CAPN12 Calpain-12 (COMP); ENSG00000162949 CAPN…	ENSMUSG00000031981 Capn9 Calpain-9 (I, HOMG_38208)	ENSMUSG00000038599 Capn8 calpain 8 (OMCL_OG2_70983, COMP, I); ENSMUSG00000031981 Capn9 Calpain-9 (OMCL_OG2_70983, COMP, I); ENSMUSG00000024942 Capn1 Calpain-1 catalytic subunit (OMCL_OG2_70983, COMP, I); ENSMUSG00000026509 Capn2 Calpain-2 catalytic subunit precursor (OMCL_OG2_70983, COMP, I); ENSMUSG00000079110 Capn3 Calpain-3 (COMP, I); ENSMUSG00000058626 Capn11 calpain 11 (OMCL_OG2_70983, COMP)…
CG2948	rev7	BP	FBgn0037345	rev7 rev7 mitosis,positive regulation of lyase activity	ENSG00000116670 MAD2L2 Mitotic spindle assembly checkpoint protein MAD2B (I, OMCL_OG2_76877)	ENSG00000116670 MAD2L2 Mitotic spindle assembly checkpoint protein MAD2B (COMP); ENSG00000162460 TMEM82 Novel protein (COMP)	ENSMUSG00000029003 Mad2l2 Mitotic spindle assembly checkpoint protein MAD2B (I, OMCL_OG2_76877)	ENSMUSG00000029003 Mad2l2 Mitotic spindle assembly checkpoint protein MAD2B (COMP); ENSMUSG00000043085 Tmem82 Transmembrane protein 82 (COMP)	CG2038	CSN7	PAIN	FBgn0028836	CSN7 COP9 complex homolog subunit 7	ENSG00000111652 COPS7A COP9 signalosome complex subunit 7a (I); ENSG00000144524 COPS7B COP9 signalosome complex subunit 7b (HOMG_8068)	ENSG00000144524 COPS7B COP9 signalosome complex subunit 7b (OMCL_OG2_73762, I, COMP); ENSG00000111652 COPS7A COP9 signalosome complex subunit 7a (OMCL_OG2_73762, COMP)	ENSMUSG00000026240 Cops7b COP9 signalosome complex subunit 7b (HOMG_8068, I)	ENSMUSG00000030127 Cops7a COP9 signalosome complex subunit 7a (OMCL_OG2_73762, I, COMP); ENSMUSG00000026240 Cops7b COP9 signalosome complex subunit 7b (OMCL_OG2_73762, COMP)
CG2948	rev7	BP	FBgn0037345	rev7 rev7 mitosis,positive regulation of lyase activity	ENSG00000116670 MAD2L2 Mitotic spindle assembly checkpoint protein MAD2B (I, OMCL_OG2_76877)	ENSG00000116670 MAD2L2 Mitotic spindle assembly checkpoint protein MAD2B (COMP); ENSG00000162460 TMEM82 Novel protein (COMP)	ENSMUSG00000029003 Mad2l2 Mitotic spindle assembly checkpoint protein MAD2B (I, OMCL_OG2_76877)	ENSMUSG00000029003 Mad2l2 Mitotic spindle assembly checkpoint protein MAD2B (COMP); ENSMUSG00000043085 Tmem82 Transmembrane protein 82 (COMP)	CG4795	Cpn	PAIN	FBgn0010218	Cpn Calphotin rhabdomere development	-	-	-	-
CG2948	rev7	BP	FBgn0037345	rev7 rev7 mitosis,positive regulation of lyase activity	ENSG00000116670 MAD2L2 Mitotic spindle assembly checkpoint protein MAD2B (I, OMCL_OG2_76877)	ENSG00000116670 MAD2L2 Mitotic spindle assembly checkpoint protein MAD2B (COMP); ENSG00000162460 TMEM82 Novel protein (COMP)	ENSMUSG00000029003 Mad2l2 Mitotic spindle assembly checkpoint protein MAD2B (I, OMCL_OG2_76877)	ENSMUSG00000029003 Mad2l2 Mitotic spindle assembly checkpoint protein MAD2B (COMP); ENSMUSG00000043085 Tmem82 Transmembrane protein 82 (COMP)	CG32381	unc-13-4A	PAIN	FBgn0035756	unc-13-4A unc-13-4A synaptic vesicle priming,neurotransmitter secretion	ENSG00000007516 BAIAP3 BAI1-associated protein 3 (I, HOMG_20844)	ENSG00000007516 BAIAP3 BAI1-associated protein 3 (COMP, OMCL_OG2_76911); ENSG00000092929 UNC13D Unc-13 homolog D (COMP, OMCL_OG2_76911)	ENSMUSG00000047507 Baiap3 BAI1-associated protein 3 (I); ENSMUSG00000057948 Unc13d unc-13 homolog D (I)	ENSMUSG00000047507 Baiap3 BAI1-associated protein 3 (COMP, OMCL_OG2_76911); ENSMUSG00000057948 Unc13d unc-13 homolog D (COMP, OMCL_OG2_76911)
CG2948	rev7	BP	FBgn0037345	rev7 rev7 mitosis,positive regulation of lyase activity	ENSG00000116670 MAD2L2 Mitotic spindle assembly checkpoint protein MAD2B (I, OMCL_OG2_76877)	ENSG00000116670 MAD2L2 Mitotic spindle assembly checkpoint protein MAD2B (COMP); ENSG00000162460 TMEM82 Novel protein (COMP)	ENSMUSG00000029003 Mad2l2 Mitotic spindle assembly checkpoint protein MAD2B (I, OMCL_OG2_76877)	ENSMUSG00000029003 Mad2l2 Mitotic spindle assembly checkpoint protein MAD2B (COMP); ENSMUSG00000043085 Tmem82 Transmembrane protein 82 (COMP)	CG8203	Cdk5	PAIN	FBgn0013762	Cdk5 Cyclin-dependent kinase 5 synaptic vesicle transport,protein amino acid phosphorylation,cell cycle,neurotransmitter secretion	ENSG00000164885 CDK5 Cell division protein kinase 5 (COMP, I); 1020 CDK5 (HOMG_3623)	ENSG00000170312 CDC2 Cell division control protein 2 homolog (OMCL_OG2_70889); ENSG00000164885 CDK5 Cell division protein kinase 5 (OMCL_OG2_70889); ENSG00000108504 CDK3 Cell division protein kinase 3 (OMCL_OG2_70889); ENSG00000123374 CDK2 Cell division protein kinase 2 (OMCL_OG2_70889)	ENSMUSG00000028969 Cdk5 Cell division protein kinase 5 (HOMG_3623, COMP, I)	ENSMUSG00000019942 Cdc2a Cell division control protein 2 homolog (OMCL_OG2_70889); ENSMUSG00000025358 Cdk2 Cell division protein kinase 2 (OMCL_OG2_70889); ENSMUSG00000034288 Cdk3 Cell division protein kinase 3 (OMCL_OG2_70889); ENSMUSG00000028969 Cdk5 Cell division protein kinase 5 (OMCL_OG2_70889)
CG2948	rev7	BP	FBgn0037345	rev7 rev7 mitosis,positive regulation of lyase activity	ENSG00000116670 MAD2L2 Mitotic spindle assembly checkpoint protein MAD2B (I, OMCL_OG2_76877)	ENSG00000116670 MAD2L2 Mitotic spindle assembly checkpoint protein MAD2B (COMP); ENSG00000162460 TMEM82 Novel protein (COMP)	ENSMUSG00000029003 Mad2l2 Mitotic spindle assembly checkpoint protein MAD2B (I, OMCL_OG2_76877)	ENSMUSG00000029003 Mad2l2 Mitotic spindle assembly checkpoint protein MAD2B (COMP); ENSMUSG00000043085 Tmem82 Transmembrane protein 82 (COMP)	CG18372	AttB	PAIN	FBgn0041581	AttB Attacin-B antibacterial humoral response,defense response to bacterium,defense response	-	-	-	-
CG2948	rev7	BP	FBgn0037345	rev7 rev7 mitosis,positive regulation of lyase activity	ENSG00000116670 MAD2L2 Mitotic spindle assembly checkpoint protein MAD2B (I, OMCL_OG2_76877)	ENSG00000116670 MAD2L2 Mitotic spindle assembly checkpoint protein MAD2B (COMP); ENSG00000162460 TMEM82 Novel protein (COMP)	ENSMUSG00000029003 Mad2l2 Mitotic spindle assembly checkpoint protein MAD2B (I, OMCL_OG2_76877)	ENSMUSG00000029003 Mad2l2 Mitotic spindle assembly checkpoint protein MAD2B (COMP); ENSMUSG00000043085 Tmem82 Transmembrane protein 82 (COMP)	CG18332	CSN3	PAIN	FBgn0027055	CSN3 COP9 complex homolog subunit 3	ENSG00000141030 COPS3 COP9 signalosome complex subunit 3 (HOMG_2710, COMP, I, OMCL_OG2_74691)	-	ENSMUSG00000019373 Cops3 COP9 signalosome complex subunit 3 (HOMG_2710, COMP, I, OMCL_OG2_74691)	-
CG3000	rap///FZD1	PAIN	FBgn0003200	rap retina aberrant in pattern eye-antennal disc morphogenesis,positive regulation of exit from mitosis,compound eye morphogenesis,protein catabolic process,cyclin catabolic process,glial cell migration	ENSG00000105325 FZR1 Fizzy-related protein homolog (HOMG_9444, I)	ENSG00000105325 FZR1 Fizzy-related protein homolog (COMP, OMCL_OG2_71747)	ENSMUSG00000020235 Fzr1 Fizzy-related protein homolog (HOMG_9444, I)	ENSMUSG00000020235 Fzr1 Fizzy-related protein homolog (COMP, OMCL_OG2_71747)	CG1956	Dmel_CG1956	BP	FBgn0004636	R Roughened dorsal closure,regulation of cell shape,regulation of embryonic cell shape,hemocyte migration,small GTPase mediated signal transduction,compound eye photoreceptor fate commitment,substrate-bound cell migration, cell extension,ovarian follicle cell stalk formation,regulation of JNK cascade,cell adhesion	ENSG00000176276 NP_0010831731 \N (HOMG_2162); ENSG00000116473 RAP1A Ras-related protein Rap-1A precursor (I)	ENSG00000127314 RAP1B Ras-related protein Rap-1b precursor (OMCL_OG2_73778, I, COMP); ENSG00000176276 NP_0010831731 \N (I, COMP); ENSG00000116473 RAP1A Ras-related protein Rap-1A precursor (OMCL_OG2_73778, COMP); ENSG00000214405 \N \N (COMP)	ENSMUSG00000068798 Rap1a Ras-related protein Rap-1A precursor (I, HOMG_2162)	ENSMUSG00000052681 Rap1b Ras-related protein Rap-1b precursor (OMCL_OG2_73778, I, COMP); ENSMUSG00000068798 Rap1a Ras-related protein Rap-1A precursor (OMCL_OG2_73778, COMP); ENSMUSG00000063495 \N \N (OMCL_OG2_73778); MGI:3643262 EG668838 predicted gene, EG668838 (I)
CG3000	rap	PAIN	FBgn0003200	rap retina aberrant in pattern eye-antennal disc morphogenesis,positive regulation of exit from mitosis,compound eye morphogenesis,protein catabolic process,cyclin catabolic process,glial cell migration	ENSG00000105325 FZR1 Fizzy-related protein homolog (HOMG_9444, I)	ENSG00000105325 FZR1 Fizzy-related protein homolog (COMP, OMCL_OG2_71747)	ENSMUSG00000020235 Fzr1 Fizzy-related protein homolog (HOMG_9444, I)	ENSMUSG00000020235 Fzr1 Fizzy-related protein homolog (COMP, OMCL_OG2_71747)	CG12363	Dlc90F	BP	FBgn0024432	Dlc90F Dynein light chain 90F spermatid development,microtubule-based movement	ENSG00000146425 DYNLT1 Dynein light chain Tctex-type 1 (COMP, I, HOMG_4754)	ENSG00000165169 DYNLT3 Dynein light chain Tctex-type 3 (OMCL_OG2_72724); ENSG00000146425 DYNLT1 Dynein light chain Tctex-type 1 (OMCL_OG2_72724)	ENSMUSG00000000579 Dynlt1 Dynein light chain Tctex-type 1 (I)	ENSMUSG00000000579 Dynlt1 Dynein light chain Tctex-type 1 (COMP, OMCL_OG2_72724, HOMG_4754); ENSMUSG00000079732 Q9DAS3_MOUSE Adult female placenta cDNA, RIKEN full-length enriched library, clone:1600032G08 product:t-complex testis expressed 1, full insert sequence (I, COMP); ENSMUSG00000079728 Q9DAS3_MOUSE Adult female placenta cDNA, RIKEN full-length enriched library, clone:1600032G08 product:t-…
CG30115	CG30115	BP	FBgn0050115	CG30115 CG30115 regulation of Rho protein signal transduction	ENSG00000120278 PLEKHG1 Pleckstrin homology domain-containing family G member 1 (OMCL_OG2_77599)	-	ENSMUSG00000040624 Plekhg1 pleckstrin homology domain containing, family G member 1 (OMCL_OG2_77599); ENSMUSG00000037552 Plekhg2 Pleckstrin homology domain-containing family G member 2 (I); ENSMUSG00000052609 Plekhg3 Pleckstrin homology domain-containing family G member 3 (I)	ENSMUSG00000040624 Plekhg1 pleckstrin homology domain containing, family G member 1 (I); ENSMUSG00000037552 Plekhg2 Pleckstrin homology domain-containing family G member 2 (I); ENSMUSG00000052609 Plekhg3 Pleckstrin homology domain-containing family G member 3 (I)	CG4863	RpL3	PAIN	FBgn0020910	RpL3 Ribosomal protein L3 mitotic spindle organization and biogenesis,translation,mitotic spindle elongation	ENSG00000100316 RPL3 60S ribosomal protein L3 (I, HOMG_747)	ENSG00000140986 RPL3L 60S ribosomal protein L3-like (OMCL_OG2_71114, I, COMP); ENSG00000100316 RPL3 60S ribosomal protein L3 (OMCL_OG2_71114, COMP)	MGI:3644217 EG668219 predicted gene, EG668219 (I); ENSMUSG00000060036 Rpl3 60S ribosomal protein L3 (I)	ENSMUSG00000068262 \N \N (OMCL_OG2_71114, I, COMP); ENSMUSG00000060036 Rpl3 60S ribosomal protein L3 (OMCL_OG2_71114, COMP, HOMG_747); MGI:3647624 EG545864 predicted gene, EG545864 (I); 100043000 LOC100043000 (HOMG_747); ENSMUSG00000060264 \N \N (OMCL_OG2_71114); ENSMUSG00000002500 Rpl3l ribosomal protein L3-like (COMP); ENSMUSG00000057111 (OMCL_OG2_71114)
CG30183	CG30183	BP	FBgn0050183	CG30183 CG30183	-	-	-	-	CG1968	CG1968	PAIN	FBgn0033401	CG1968 CG1968	ENSG00000133103 COG6 Conserved oligomeric Golgi complex component 6 (HOMG_10802, COMP, I, OMCL_OG2_73745)	-	ENSMUSG00000027742 Cog6 Conserved oligomeric Golgi complex component 6 (HOMG_10802, COMP, I, OMCL_OG2_73745)	-
CG30291	CG30291	PAIN	FBgn0050291	CG30291 CG30291 regulation of cyclin-dependent protein kinase activity	ENSG00000108465 CDK5RAP3 CDK5 regulatory subunit-associated protein 3 (OMCL_OG2_77185, COMP, I); 80279 CDK5RAP3 (HOMG_12718)	-	ENSMUSG00000018669 Cdk5rap3 CDK5 regulatory subunit-associated protein 3 (OMCL_OG2_77185, COMP, I, HOMG_12718)	-	CG34404	CG34404	BP	FBgn0085433	CG34404	ENSG00000171444 MCC Colorectal mutant cancer protein (HOMG_20539, I, OMCL_OG2_83801)	ENSG00000130307 USHBP1 USH1C-binding protein 1 (COMP); ENSG00000171444 MCC Colorectal mutant cancer protein (COMP)	ENSMUSG00000071856 Mcc mutated in colorectal cancers isoform 1 (I, OMCL_OG2_83801)	ENSMUSG00000034911 Ushbp1 USH1C-binding protein 1 (COMP); ENSMUSG00000071856 Mcc mutated in colorectal cancers isoform 1 (COMP)
CG30291	CG30291	PAIN	FBgn0050291	CG30291 CG30291 regulation of cyclin-dependent protein kinase activity	ENSG00000108465 CDK5RAP3 CDK5 regulatory subunit-associated protein 3 (OMCL_OG2_77185, COMP, I); 80279 CDK5RAP3 (HOMG_12718)	-	ENSMUSG00000018669 Cdk5rap3 CDK5 regulatory subunit-associated protein 3 (OMCL_OG2_77185, COMP, I, HOMG_12718)	-	CG3610	CG3610	BP	FBgn0038266	CG3610 CG3610	-	-	-	-
CG30387	CG30387	BP	FBgn0050387	CG30387 CG30387	ENSG00000134313 NP_0657891 kinase D-interacting substrate of 220 kDa (OMCL_OG2_76425, HOMG_14254, COMP, I)	-	ENSMUSG00000036333 C330002I19Rik kinase D-interacting substrate of 220 kDa (OMCL_OG2_76425, HOMG_14254, COMP, I)	-	CG1725	dlg1	PAIN	FBgn0001624	dlg1 discs large 1 morphogenesis of follicular epithelium,negative regulation of cell proliferation,establishment and/or maintenance of neuroblast polarity,septate junction assembly,basal protein localization,morphogenesis of a polarized epithelium,neuron differentiation,establishment and/or maintenance of polarity of embryonic epithelium,morphogenesis of an epithelium,establishment and/or mainte…	ENSG00000075711 DLG1 Disks large homolog 1 (I, HOMG_20869)	ENSG00000082458 DLG3 Discs large homolog 3 (I, OMCL_OG2_73729); ENSG00000132535 DLG4 Discs large homolog 4 (I, OMCL_OG2_73729); ENSG00000150672 DLG2 Discs large homolog 2 (I, OMCL_OG2_73729); ENSG00000075711 DLG1 Disks large homolog 1 (OMCL_OG2_73729)	ENSMUSG00000022770 Dlg1 Disks large homolog 1 (I, HOMG_20869)	ENSMUSG00000052572 Dlg2 Disks large homolog 2 (I, OMCL_OG2_73729); ENSMUSG00000020886 Dlg4 Disks large homolog 4 (I, OMCL_OG2_73729); ENSMUSG00000000881 Dlg3 Disks large homolog 3 (I, OMCL_OG2_73729); ENSMUSG00000022770 Dlg1 Disks large homolog 1 (OMCL_OG2_73729)
CG30404	Tango11	PAIN	FBgn0050404	Tango11 Transport and Golgi organization biological_process	ENSG00000168958 C2orf33 Uncharacterized protein C2orf33 (COMP, I)	-	ENSMUSG00000026150 5230400G24Rik Uncharacterized protein C2orf33 homolog (COMP, I)	MGI:3645666 EG628871 predicted gene, EG628871 (I)	CG12200	CG12200	BP	FBgn0031018	CG12200 CG12200	-	ENSG00000215277 \N \N (COMP); ENSG00000178222 RNF212 ring finger protein 212 (COMP)	ENSMUSG00000071425 \N \N (I)	ENSMUSG00000071425 \N \N (COMP); ENSMUSG00000055385 Rnf212 Activated spleen cDNA, RIKEN full-length enriched library, clone:F830003B07 product:hypothetical protein, full insert sequence (COMP)
CG30404	Tango11	PAIN	FBgn0050404	Tango11 Transport and Golgi organization biological_process	ENSG00000168958 C2orf33 Uncharacterized protein C2orf33 (COMP, I)	-	ENSMUSG00000026150 5230400G24Rik Uncharacterized protein C2orf33 homolog (COMP, I)	MGI:3645666 EG628871 predicted gene, EG628871 (I)	CG12114	spn-F	BP	FBgn0086362	spn-F spn-F oocyte axis determination,oocyte microtubule cytoskeleton organization,bristle morphogenesis	-	-	-	-
CG3052	HLH4C	BP	FBgn0011277	HLH4C Helix loop helix protein 4C regulation of transcription	ENSG00000171786 NHLH1 Helix-loop-helix protein 1 (HOMG_4089, I)	ENSG00000177551 NHLH2 Helix-loop-helix protein 2 (OMCL_OG2_78258, I, COMP); ENSG00000171786 NHLH1 Helix-loop-helix protein 1 (OMCL_OG2_78258, COMP)	ENSMUSG00000051251 Nhlh1 Helix-loop-helix protein 1 (HOMG_4089, I); MGI:98481 Nhlh1 nescient helix loop helix 1 (I)	ENSMUSG00000048540 Nhlh2 Helix-loop-helix protein 2 (OMCL_OG2_78258, I, COMP); ENSMUSG00000051251 Nhlh1 Helix-loop-helix protein 1 (OMCL_OG2_78258, COMP)	CG6972	CG6972	PAIN	FBgn0039008	CG6972 CG6972	ENSG00000100418 NP_0565191 DJ347H134 protein (COMP)	ENSG00000167280 NP_0010360381 endo-beta-N-acetylglucosaminidase (OMCL_OG2_71252); ENSG00000100418 NP_0565191 DJ347H134 protein (OMCL_OG2_71252)	ENSMUSG00000022472 D15Wsu75e Adult male testis cDNA, RIKEN full-length enriched library, clone:1700013M01 product:hypothetical protein, full insert sequence CRL-1722 L5178Y-R cDNA, RIKEN full-length enriched library, clone: (COMP)	ENSMUSG00000033857 D230014K01Rik endo-beta-N-acetylglucosaminidase (OMCL_OG2_71252); ENSMUSG00000022472 D15Wsu75e Adult male testis cDNA, RIKEN full-length enriched library, clone:1700013M01 product:hypothetical protein, full insert sequence CRL-1722 L5178Y-R cDNA, RIKEN full-length enriched library, clone: (OMCL_OG2_71252)
CG3052	HLH4C	BP	FBgn0011277	HLH4C Helix loop helix protein 4C regulation of transcription	ENSG00000171786 NHLH1 Helix-loop-helix protein 1 (HOMG_4089, I)	ENSG00000177551 NHLH2 Helix-loop-helix protein 2 (OMCL_OG2_78258, I, COMP); ENSG00000171786 NHLH1 Helix-loop-helix protein 1 (OMCL_OG2_78258, COMP)	ENSMUSG00000051251 Nhlh1 Helix-loop-helix protein 1 (HOMG_4089, I); MGI:98481 Nhlh1 nescient helix loop helix 1 (I)	ENSMUSG00000048540 Nhlh2 Helix-loop-helix protein 2 (OMCL_OG2_78258, I, COMP); ENSMUSG00000051251 Nhlh1 Helix-loop-helix protein 1 (OMCL_OG2_78258, COMP)	CG15167	CG15167	PAIN	FBgn0032709	CG15167 CG15167	-	-	-	-
CG3085	CG3085	BP	FBgn0034816	CG3085 CG3085 microtubule cytoskeleton organization and biogenesis	ENSG00000092850 TEKT2 Tektin-2 (HOMG_8043, OMCL_OG2_80669, COMP, I)	-	ENSMUSG00000028845 Tekt2 Tektin-2 (HOMG_8043, OMCL_OG2_80669, COMP, I)	-	CG14217	Tao-1	PAIN	FBgn0031030	Tao-1 Tao-1 protein amino acid phosphorylation	ENSG00000160551 TAOK1 Serine/threonine-protein kinase TAO1 (HOMG_27041, I)	ENSG00000135090 TAOK3 Serine/threonine-protein kinase TAO3 CTCL tumor (OMCL_OG2_73166, I, COMP); ENSG00000149930 TAOK2 Serine/threonine-protein kinase TAO2 (OMCL_OG2_73166, I, COMP); ENSG00000160551 TAOK1 Serine/threonine-protein kinase TAO1 (OMCL_OG2_73166, COMP)	ENSMUSG00000017291 Taok1 Serine/threonine-protein kinase TAO1 (HOMG_27041, I)	ENSMUSG00000059981 Taok2 Serine/threonine-protein kinase TAO2 (OMCL_OG2_73166, I, COMP); ENSMUSG00000061288 Taok3 Serine/threonine-protein kinase TAO3 (OMCL_OG2_73166, I, COMP); ENSMUSG00000017291 Taok1 Serine/threonine-protein kinase TAO1 (OMCL_OG2_73166, COMP)
CG3099	CG3099	BP	FBgn0030145	CG3099 CG3099 ubiquitin cycle	ENSG00000138411 HECW2 E3 ubiquitin-protein ligase HECW2 (HOMG_66192, I)	ENSG00000002746 HECW1 E3 ubiquitin-protein ligase HECW1 (I, COMP, OMCL_OG2_75534); ENSG00000138411 HECW2 E3 ubiquitin-protein ligase HECW2 (COMP, OMCL_OG2_75534)	ENSMUSG00000042807 Hecw2 E3 ubiquitin-protein ligase HECW2 (HOMG_66192, I)	ENSMUSG00000021301 Hecw1 E3 ubiquitin-protein ligase HECW1 (I, COMP, OMCL_OG2_75534); ENSMUSG00000042807 Hecw2 E3 ubiquitin-protein ligase HECW2 (COMP, OMCL_OG2_75534)	CG7172	CG7172	PAIN	FBgn0037102	CG7172 CG7172	ENSG00000179271 GADD45GIP1 Growth arrest and DNA-damage-inducible proteins-interacting protein 1 (COMP, I, OMCL_OG2_78702)	-	ENSMUSG00000033751 Gadd45gip1 Growth arrest and DNA-damage-inducible proteins-interacting protein 1 (COMP, I, OMCL_OG2_78702)	-
CG3099	CG3099	BP	FBgn0030145	CG3099 CG3099 ubiquitin cycle	ENSG00000138411 HECW2 E3 ubiquitin-protein ligase HECW2 (HOMG_66192, I)	ENSG00000002746 HECW1 E3 ubiquitin-protein ligase HECW1 (I, COMP, OMCL_OG2_75534); ENSG00000138411 HECW2 E3 ubiquitin-protein ligase HECW2 (COMP, OMCL_OG2_75534)	ENSMUSG00000042807 Hecw2 E3 ubiquitin-protein ligase HECW2 (HOMG_66192, I)	ENSMUSG00000021301 Hecw1 E3 ubiquitin-protein ligase HECW1 (I, COMP, OMCL_OG2_75534); ENSMUSG00000042807 Hecw2 E3 ubiquitin-protein ligase HECW2 (COMP, OMCL_OG2_75534)	CG4863	RpL3	PAIN	FBgn0020910	RpL3 Ribosomal protein L3 mitotic spindle organization and biogenesis,translation,mitotic spindle elongation	ENSG00000100316 RPL3 60S ribosomal protein L3 (I, HOMG_747)	ENSG00000140986 RPL3L 60S ribosomal protein L3-like (OMCL_OG2_71114, I, COMP); ENSG00000100316 RPL3 60S ribosomal protein L3 (OMCL_OG2_71114, COMP)	MGI:3644217 EG668219 predicted gene, EG668219 (I); ENSMUSG00000060036 Rpl3 60S ribosomal protein L3 (I)	ENSMUSG00000068262 \N \N (OMCL_OG2_71114, I, COMP); ENSMUSG00000060036 Rpl3 60S ribosomal protein L3 (OMCL_OG2_71114, COMP, HOMG_747); MGI:3647624 EG545864 predicted gene, EG545864 (I); 100043000 LOC100043000 (HOMG_747); ENSMUSG00000060264 \N \N (OMCL_OG2_71114); ENSMUSG00000002500 Rpl3l ribosomal protein L3-like (COMP); ENSMUSG00000057111 (OMCL_OG2_71114)
CG31094	LpR1	BP	FBgn0066101	LpR1 LpR1 lipoprotein transport,cholesterol metabolic process	ENSG00000147852 VLDLR Very low-density lipoprotein receptor precursor (I, HOMG_443)	ENSG00000157193 LRP8 Low-density lipoprotein receptor-related protein 8 precursor (I, OMCL_OG2_74693); ENSG00000130164 LDLR Low-density lipoprotein receptor precursor (I, OMCL_OG2_74693); ENSG00000147852 VLDLR Very low-density lipoprotein receptor precursor (OMCL_OG2_74693)	ENSMUSG00000024924 Vldlr Very low-density lipoprotein receptor precursor (I, HOMG_443)	ENSMUSG00000024924 Vldlr Very low-density lipoprotein receptor precursor (I, OMCL_OG2_74693); ENSMUSG00000028613 Lrp8 Low-density lipoprotein receptor-related protein 8 precursor (I, OMCL_OG2_74693); ENSMUSG00000032193 Ldlr Low-density lipoprotein receptor precursor (I, OMCL_OG2_74693)	CG4863	RpL3	PAIN	FBgn0020910	RpL3 Ribosomal protein L3 mitotic spindle organization and biogenesis,translation,mitotic spindle elongation	ENSG00000100316 RPL3 60S ribosomal protein L3 (I, HOMG_747)	ENSG00000140986 RPL3L 60S ribosomal protein L3-like (OMCL_OG2_71114, I, COMP); ENSG00000100316 RPL3 60S ribosomal protein L3 (OMCL_OG2_71114, COMP)	MGI:3644217 EG668219 predicted gene, EG668219 (I); ENSMUSG00000060036 Rpl3 60S ribosomal protein L3 (I)	ENSMUSG00000068262 \N \N (OMCL_OG2_71114, I, COMP); ENSMUSG00000060036 Rpl3 60S ribosomal protein L3 (OMCL_OG2_71114, COMP, HOMG_747); MGI:3647624 EG545864 predicted gene, EG545864 (I); 100043000 LOC100043000 (HOMG_747); ENSMUSG00000060264 \N \N (OMCL_OG2_71114); ENSMUSG00000002500 Rpl3l ribosomal protein L3-like (COMP); ENSMUSG00000057111 (OMCL_OG2_71114)
CG31094	LpR1	BP	FBgn0066101	LpR1 LpR1 lipoprotein transport,cholesterol metabolic process	ENSG00000147852 VLDLR Very low-density lipoprotein receptor precursor (I, HOMG_443)	ENSG00000157193 LRP8 Low-density lipoprotein receptor-related protein 8 precursor (I, OMCL_OG2_74693); ENSG00000130164 LDLR Low-density lipoprotein receptor precursor (I, OMCL_OG2_74693); ENSG00000147852 VLDLR Very low-density lipoprotein receptor precursor (OMCL_OG2_74693)	ENSMUSG00000024924 Vldlr Very low-density lipoprotein receptor precursor (I, HOMG_443)	ENSMUSG00000024924 Vldlr Very low-density lipoprotein receptor precursor (I, OMCL_OG2_74693); ENSMUSG00000028613 Lrp8 Low-density lipoprotein receptor-related protein 8 precursor (I, OMCL_OG2_74693); ENSMUSG00000032193 Ldlr Low-density lipoprotein receptor precursor (I, OMCL_OG2_74693)	CG2151	Trxr-1	PAIN	FBgn0020653	Trxr-1 Thioredoxin reductase-1 electron transport,determination of adult life span,cell redox homeostasis	ENSG00000211449 (HOMG_55733); ENSG00000184470 TXNRD2 Thioredoxin reductase 2, mitochondrial precursor (I)	ENSG00000184470 TXNRD2 Thioredoxin reductase 2, mitochondrial precursor (OMCL_OG2_70822, COMP); ENSG00000211449 (OMCL_OG2_70822); ENSG00000104687 GSR Glutathione reductase, mitochondrial precursor (OMCL_OG2_70822); ENSG00000198431 TXNRD1 Thioredoxin reductase 1, cytoplasmic precursor (OMCL_OG2_70822); ENSG00000197763 TXNRD3 Thioredoxin reductase 3 (OMCL_OG2_70822)	ENSMUSG00000075704 Txnrd2 Thioredoxin reductase 2, mitochondrial precursor (I); ENSMUSG00000020250 Txnrd1 Thioredoxin reductase 1, cytoplasmic (HOMG_55733)	ENSMUSG00000075704 Txnrd2 Thioredoxin reductase 2, mitochondrial precursor (OMCL_OG2_70822, COMP); ENSMUSG00000000811 Txnrd3 thioredoxin reductase 3 (OMCL_OG2_70822); ENSMUSG00000031584 Gsr Glutathione reductase, mitochondrial precursor (OMCL_OG2_70822); ENSMUSG00000020250 Txnrd1 Thioredoxin reductase 1, cytoplasmic (OMCL_OG2_70822)
CG3114	ewg	BP	FBgn0005427	ewg erect wing central nervous system development,imaginal disc morphogenesis,muscle development	ENSG00000106459 NRF1 Nuclear respiratory factor 1 (OMCL_OG2_80522, COMP, I)	-	ENSMUSG00000058440 Nrf1 Nuclear respiratory factor 1 (OMCL_OG2_80522, COMP, I)	-	CG4550	ninaE	PAIN	FBgn0002940	ninaE neither inactivation nor afterpotential E phototransduction,G-protein coupled receptor protein signaling pathway,rhabdomere development,negative regulation of compound eye retinal cell programmed cell death,response to light intensity,adult locomotory behavior,photoreceptor cell morphogenesis	-	ENSG00000122375 OPN4 Melanopsin (OMCL_OG2_75321, I, COMP)	-	ENSMUSG00000021799 Opn4 Melanopsin (OMCL_OG2_75321, I, COMP)
CG3114	ewg	BP	FBgn0005427	ewg erect wing central nervous system development,imaginal disc morphogenesis,muscle development	ENSG00000106459 NRF1 Nuclear respiratory factor 1 (OMCL_OG2_80522, COMP, I)	-	ENSMUSG00000058440 Nrf1 Nuclear respiratory factor 1 (OMCL_OG2_80522, COMP, I)	-	CG32346	E(bx)	PAIN	FBgn0000541	E(bx) Enhancer of bithorax ecdysone receptor-mediated signaling pathway,nucleosome mobilization,pupariation,dendrite morphogenesis,hemopoiesis,nucleosome assembly,chromatin remodeling,transcription	ENSG00000171634 BPTF Nucleosome remodeling factor subunit BPTF (OMCL_OG2_75688, I)	-	ENSMUSG00000040481 Bptf Fetal Alzheimer antigen (I)	ENSMUSG00000040481 Bptf Fetal Alzheimer antigen (OMCL_OG2_75688); ENSMUSG00000075471 (OMCL_OG2_75688)
CG31170	epsin-like	PAIN	FBgn0259107	epsin-like epsin-like synaptic vesicle endocytosis,biological_process,neurotransmitter secretion	ENSG00000100726 TELO2 TEL2, telomere maintenance 2, homolog (OMCL_OG2_76033, COMP, I, HOMG_41107); ENSG00000113282 Q14677-2 EPN4_HUMAN Isoform 2 of Q14677 - Homo sapiens (COMP, I, OMCL_OG2_72575); 9685 CLINT1 (HOMG_6309)	-	ENSMUSG00000024170 Telo2 TEL2, telomere maintenance 2, homolog (OMCL_OG2_76033, COMP, I, HOMG_41107); ENSMUSG00000006169 Clint1 Clathrin interactor 1 (HOMG_6309, COMP, OMCL_OG2_72575)	-	CG10814	CG10814	BP	FBgn0033830	CG10814 CG10814 electron transport	-	ENSG00000129151 BBOX1 Gamma-butyrobetaine dioxygenase (I, COMP, OMCL_OG2_75260)	-	ENSMUSG00000041660 Bbox1 Gamma-butyrobetaine dioxygenase (I, COMP)
CG31170	epsin-like	PAIN	FBgn0259107	epsin-like epsin-like synaptic vesicle endocytosis,biological_process,neurotransmitter secretion	ENSG00000100726 TELO2 TEL2, telomere maintenance 2, homolog (OMCL_OG2_76033, COMP, I, HOMG_41107); ENSG00000113282 Q14677-2 EPN4_HUMAN Isoform 2 of Q14677 - Homo sapiens (COMP, I, OMCL_OG2_72575); 9685 CLINT1 (HOMG_6309)	-	ENSMUSG00000024170 Telo2 TEL2, telomere maintenance 2, homolog (OMCL_OG2_76033, COMP, I, HOMG_41107); ENSMUSG00000006169 Clint1 Clathrin interactor 1 (HOMG_6309, COMP, OMCL_OG2_72575)	-	CG3052	HLH4C	BP	FBgn0011277	HLH4C Helix loop helix protein 4C regulation of transcription	ENSG00000171786 NHLH1 Helix-loop-helix protein 1 (HOMG_4089, I)	ENSG00000177551 NHLH2 Helix-loop-helix protein 2 (OMCL_OG2_78258, I, COMP); ENSG00000171786 NHLH1 Helix-loop-helix protein 1 (OMCL_OG2_78258, COMP)	ENSMUSG00000051251 Nhlh1 Helix-loop-helix protein 1 (HOMG_4089, I); MGI:98481 Nhlh1 nescient helix loop helix 1 (I)	ENSMUSG00000048540 Nhlh2 Helix-loop-helix protein 2 (OMCL_OG2_78258, I, COMP); ENSMUSG00000051251 Nhlh1 Helix-loop-helix protein 1 (OMCL_OG2_78258, COMP)
CG31170	epsin-like	PAIN	FBgn0259107	epsin-like epsin-like synaptic vesicle endocytosis,biological_process,neurotransmitter secretion	ENSG00000100726 TELO2 TEL2, telomere maintenance 2, homolog (OMCL_OG2_76033, COMP, I, HOMG_41107); ENSG00000113282 Q14677-2 EPN4_HUMAN Isoform 2 of Q14677 - Homo sapiens (COMP, I, OMCL_OG2_72575); 9685 CLINT1 (HOMG_6309)	-	ENSMUSG00000024170 Telo2 TEL2, telomere maintenance 2, homolog (OMCL_OG2_76033, COMP, I, HOMG_41107); ENSMUSG00000006169 Clint1 Clathrin interactor 1 (HOMG_6309, COMP, OMCL_OG2_72575)	-	CG3937	cher	BP	FBgn0014141	cher cheerio ring canal formation, actin assembly,olfactory learning,determination of adult life span,germarium-derived female germ-line cyst encapsulation,ring canal formation,negative regulation of lamellocyte differentiation,protein localization,learning and/or memory,ovarian ring canal formation	ENSG00000196924 FLNA Filamin-A (HOMG_1119, I)	ENSG00000128591 FLNC Filamin-C (OMCL_OG2_72790, I); ENSG00000136068 FLNB Filamin-B (OMCL_OG2_72790, I); ENSG00000196924 FLNA Filamin-A (OMCL_OG2_72790)	ENSMUSG00000031328 Flna Filamin-A (HOMG_1119, I)	ENSMUSG00000025278 Flnb Filamin-B (OMCL_OG2_72790, I); ENSMUSG00000068699 Flnc Filamin-C (OMCL_OG2_72790, I); ENSMUSG00000031328 Flna Filamin-A (OMCL_OG2_72790)
CG31170	epsin-like	PAIN	FBgn0259107	epsin-like epsin-like synaptic vesicle endocytosis,biological_process,neurotransmitter secretion	ENSG00000100726 TELO2 TEL2, telomere maintenance 2, homolog (OMCL_OG2_76033, COMP, I, HOMG_41107); ENSG00000113282 Q14677-2 EPN4_HUMAN Isoform 2 of Q14677 - Homo sapiens (COMP, I, OMCL_OG2_72575); 9685 CLINT1 (HOMG_6309)	-	ENSMUSG00000024170 Telo2 TEL2, telomere maintenance 2, homolog (OMCL_OG2_76033, COMP, I, HOMG_41107); ENSMUSG00000006169 Clint1 Clathrin interactor 1 (HOMG_6309, COMP, OMCL_OG2_72575)	-	CG12992	CG12992	BP	FBgn0030846	CG12992 CG12992	-	-	-	-
CG31170	epsin-like	PAIN	FBgn0259107	epsin-like epsin-like synaptic vesicle endocytosis,biological_process,neurotransmitter secretion	ENSG00000100726 TELO2 TEL2, telomere maintenance 2, homolog (OMCL_OG2_76033, COMP, I, HOMG_41107); ENSG00000113282 Q14677-2 EPN4_HUMAN Isoform 2 of Q14677 - Homo sapiens (COMP, I, OMCL_OG2_72575); 9685 CLINT1 (HOMG_6309)	-	ENSMUSG00000024170 Telo2 TEL2, telomere maintenance 2, homolog (OMCL_OG2_76033, COMP, I, HOMG_41107); ENSMUSG00000006169 Clint1 Clathrin interactor 1 (HOMG_6309, COMP, OMCL_OG2_72575)	-	CG7021	Ela	BP	FBgn0013949	Ela Elastin-like phosphate transport	-	-	-	-
CG31170	epsin-like	PAIN	FBgn0259107	epsin-like epsin-like synaptic vesicle endocytosis,biological_process,neurotransmitter secretion	ENSG00000100726 TELO2 TEL2, telomere maintenance 2, homolog (OMCL_OG2_76033, COMP, I, HOMG_41107); ENSG00000113282 Q14677-2 EPN4_HUMAN Isoform 2 of Q14677 - Homo sapiens (COMP, I, OMCL_OG2_72575); 9685 CLINT1 (HOMG_6309)	-	ENSMUSG00000024170 Telo2 TEL2, telomere maintenance 2, homolog (OMCL_OG2_76033, COMP, I, HOMG_41107); ENSMUSG00000006169 Clint1 Clathrin interactor 1 (HOMG_6309, COMP, OMCL_OG2_72575)	-	CG3217	CkIIalpha-i3	BP	FBgn0025676	CkIIalpha-i3 CKII-Î± subunit interactor-3	-	-	-	-
CG31170	epsin-like	PAIN	FBgn0259107	epsin-like epsin-like synaptic vesicle endocytosis,biological_process,neurotransmitter secretion	ENSG00000100726 TELO2 TEL2, telomere maintenance 2, homolog (OMCL_OG2_76033, COMP, I, HOMG_41107); ENSG00000113282 Q14677-2 EPN4_HUMAN Isoform 2 of Q14677 - Homo sapiens (COMP, I, OMCL_OG2_72575); 9685 CLINT1 (HOMG_6309)	-	ENSMUSG00000024170 Telo2 TEL2, telomere maintenance 2, homolog (OMCL_OG2_76033, COMP, I, HOMG_41107); ENSMUSG00000006169 Clint1 Clathrin interactor 1 (HOMG_6309, COMP, OMCL_OG2_72575)	-	CG8965	CG8965	BP	FBgn0031745	CG8965 CG8965 signal transduction	-	-	-	-
CG31204	CG31204	BP	FBgn0051204	CG31204 CG31204	-	-	-	-	CG8203	Cdk5	PAIN	FBgn0013762	Cdk5 Cyclin-dependent kinase 5 synaptic vesicle transport,protein amino acid phosphorylation,cell cycle,neurotransmitter secretion	ENSG00000164885 CDK5 Cell division protein kinase 5 (COMP, I); 1020 CDK5 (HOMG_3623)	ENSG00000170312 CDC2 Cell division control protein 2 homolog (OMCL_OG2_70889); ENSG00000164885 CDK5 Cell division protein kinase 5 (OMCL_OG2_70889); ENSG00000108504 CDK3 Cell division protein kinase 3 (OMCL_OG2_70889); ENSG00000123374 CDK2 Cell division protein kinase 2 (OMCL_OG2_70889)	ENSMUSG00000028969 Cdk5 Cell division protein kinase 5 (HOMG_3623, COMP, I)	ENSMUSG00000019942 Cdc2a Cell division control protein 2 homolog (OMCL_OG2_70889); ENSMUSG00000025358 Cdk2 Cell division protein kinase 2 (OMCL_OG2_70889); ENSMUSG00000034288 Cdk3 Cell division protein kinase 3 (OMCL_OG2_70889); ENSMUSG00000028969 Cdk5 Cell division protein kinase 5 (OMCL_OG2_70889)
CG31211	CG31211	BP	FBgn0051211	CG31211 CG31211	ENSG00000132424 SFRS18 Splicing factor, arginine/serine-rich 130 (I, OMCL_OG2_76922, HOMG_32802)	-	ENSMUSG00000028248 Sfrs18 Splicing factor, arginine/serine-rich 18 (I, OMCL_OG2_76922, HOMG_32802)	-	CG4550	ninaE	PAIN	FBgn0002940	ninaE neither inactivation nor afterpotential E phototransduction,G-protein coupled receptor protein signaling pathway,rhabdomere development,negative regulation of compound eye retinal cell programmed cell death,response to light intensity,adult locomotory behavior,photoreceptor cell morphogenesis	-	ENSG00000122375 OPN4 Melanopsin (OMCL_OG2_75321, I, COMP)	-	ENSMUSG00000021799 Opn4 Melanopsin (OMCL_OG2_75321, I, COMP)
CG31211	CG31211	BP	FBgn0051211	CG31211 CG31211	ENSG00000132424 SFRS18 Splicing factor, arginine/serine-rich 130 (I, OMCL_OG2_76922, HOMG_32802)	-	ENSMUSG00000028248 Sfrs18 Splicing factor, arginine/serine-rich 18 (I, OMCL_OG2_76922, HOMG_32802)	-	CG6066	CG6066	PAIN	FBgn0039488	CG6066 CG6066	ENSG00000101882 NKAP NF-kappa-B-activating protein (I, HOMG_11570)	ENSG00000189134 NKAPL UPF0396 protein C6orf194 (OMCL_OG2_73241, I, COMP); ENSG00000101882 NKAP NF-kappa-B-activating protein (OMCL_OG2_73241, COMP)	ENSMUSG00000016409 Nkap NF-kappa-B-activating protein (I, HOMG_11570)	ENSMUSG00000059395 Nkapl NFKB activating protein-like (OMCL_OG2_73241, I, COMP); ENSMUSG00000016409 Nkap NF-kappa-B-activating protein (OMCL_OG2_73241, COMP)
CG31211	CG31211	BP	FBgn0051211	CG31211 CG31211	ENSG00000132424 SFRS18 Splicing factor, arginine/serine-rich 130 (I, OMCL_OG2_76922, HOMG_32802)	-	ENSMUSG00000028248 Sfrs18 Splicing factor, arginine/serine-rich 18 (I, OMCL_OG2_76922, HOMG_32802)	-	CG5989	CG5989	PAIN	FBgn0017429	CG5989 CG5989	ENSG00000050426 LETMD1 LETM1 domain containing 1 isoform 1 (HOMG_9128, COMP, I, OMCL_OG2_78714)	-	ENSMUSG00000037353 Letmd1 LETM1 domain-containing protein 1 (HOMG_9128, COMP, I, OMCL_OG2_78714)	-
CG31211	CG31211	BP	FBgn0051211	CG31211 CG31211	ENSG00000132424 SFRS18 Splicing factor, arginine/serine-rich 130 (I, OMCL_OG2_76922, HOMG_32802)	-	ENSMUSG00000028248 Sfrs18 Splicing factor, arginine/serine-rich 18 (I, OMCL_OG2_76922, HOMG_32802)	-	CG9696	dom	PAIN	FBgn0020306	dom domino negative regulation of hemocyte proliferation,instar larval or pupal development,cell proliferation,DNA topological change,regulation of alternative nuclear mRNA splicing, via spliceosome,establishment and/or maintenance of chromatin architecture,gene silencing,hemopoiesis,oogenesis	ENSG00000080603 NP_0066532 Snf2-related CBP activator protein (I)	ENSG00000183495 EP400 E1A-binding protein p400 (OMCL_OG2_71601); ENSG00000185684 EP400NL EP400NL protein (OMCL_OG2_71601); ENSG00000080603 NP_0066532 Snf2-related CBP activator protein (OMCL_OG2_71601)	ENSMUSG00000029505 Ep400 E1A-binding protein p400 (I)	ENSMUSG00000053877 Srcap 12 days embryo spinal ganglion cDNA, RIKEN full-length enriched library, clone:D130006K13 product:hypothetical protein, full insert sequence (OMCL_OG2_71601); ENSMUSG00000029505 Ep400 E1A-binding protein p400 (OMCL_OG2_71601)
CG31299	nocturnin	PAIN	FBgn0037872	nocturnin nocturnin	ENSG00000151014 CCRN4L Nocturnin (OMCL_OG2_77929, COMP, I)	-	ENSMUSG00000023087 Ccrn4l Nocturnin (OMCL_OG2_77929, COMP, I)	-	CG6985	CG6985	BP	FBgn0039017	CG6985 CG6985	-	-	-	-
CG31317	stumps	BP	FBgn0020299	stumps stumps open tracheal system development,mesoderm development,fibroblast growth factor receptor signaling pathway,gastrulation,primary branching, open tracheal system,mesoderm migration,epithelial cell migration, open tracheal system,mesodermal cell migration,heart development,morphogenesis of a branching structure,oogenesis	ENSG00000155629 PIK3AP1 phosphoinositide-3-kinase adaptor protein 1 (OMCL_OG2_81374)	ENSG00000155629 PIK3AP1 phosphoinositide-3-kinase adaptor protein 1 (COMP); ENSG00000153064 BANK1 B-cell scaffold protein with ankyrin repeats (COMP)	ENSMUSG00000025017 Pik3ap1 phosphoinositide-3-kinase adaptor protein 1 (OMCL_OG2_81374)	ENSMUSG00000037922 Bank1 B-cell scaffold protein with ankyrin repeats (COMP); ENSMUSG00000025017 Pik3ap1 phosphoinositide-3-kinase adaptor protein 1 (COMP)	CG7223	htl	PAIN	FBgn0010389	htl heartless ventral cord development,fibroblast growth factor receptor signaling pathway,gonad development,visceral muscle development,endodermal cell fate determination,gonadal mesoderm development,germ cell migration,cardioblast differentiation,mesodermal cell fate determination,pericardial cell differentiation,salivary gland development,somatic muscle development,mesodermal cell fate commitm…	ENSG00000077782 FGFR1 Basic fibroblast growth factor receptor 1 precursor (I); ENSG00000068078 FGFR3 Fibroblast growth factor receptor 3 precursor (HOMG_55437); ENSG00000066468 FGFR2 Fibroblast growth factor receptor 2 precursor (I)	ENSG00000160867 FGFR4 Fibroblast growth factor receptor 4 precursor (COMP, I, OMCL_OG2_73518); ENSG00000068078 FGFR3 Fibroblast growth factor receptor 3 precursor (COMP, I, OMCL_OG2_73518); ENSG00000077782 FGFR1 Basic fibroblast growth factor receptor 1 precursor (COMP, OMCL_OG2_73518); ENSG00000066468 FGFR2 Fibroblast growth factor receptor 2 precursor (COMP, OMCL_OG2_73518)	ENSMUSG00000054252 Fgfr3 Fibroblast growth factor receptor 3 precursor (HOMG_55437, I); ENSMUSG00000030849 Fgfr2 Fibroblast growth factor receptor 2 precursor (I); ENSMUSG00000031565 Fgfr1 Basic fibroblast growth factor receptor 1 precursor (I)	ENSMUSG00000054252 Fgfr3 Fibroblast growth factor receptor 3 precursor (COMP, I, OMCL_OG2_73518); ENSMUSG00000031565 Fgfr1 Basic fibroblast growth factor receptor 1 precursor (COMP, I, OMCL_OG2_73518); ENSMUSG00000005320 Fgfr4 Fibroblast growth factor receptor 4 precursor (COMP, I, OMCL_OG2_73518); ENSMUSG00000030849 Fgfr2 Fibroblast growth factor receptor 2 precursor (COMP, OMCL_OG2_73518)
CG31317	stumps	BP	FBgn0020299	stumps stumps open tracheal system development,mesoderm development,fibroblast growth factor receptor signaling pathway,gastrulation,primary branching, open tracheal system,mesoderm migration,epithelial cell migration, open tracheal system,mesodermal cell migration,heart development,morphogenesis of a branching structure,oogenesis	ENSG00000155629 PIK3AP1 phosphoinositide-3-kinase adaptor protein 1 (OMCL_OG2_81374)	ENSG00000155629 PIK3AP1 phosphoinositide-3-kinase adaptor protein 1 (COMP); ENSG00000153064 BANK1 B-cell scaffold protein with ankyrin repeats (COMP)	ENSMUSG00000025017 Pik3ap1 phosphoinositide-3-kinase adaptor protein 1 (OMCL_OG2_81374)	ENSMUSG00000037922 Bank1 B-cell scaffold protein with ankyrin repeats (COMP); ENSMUSG00000025017 Pik3ap1 phosphoinositide-3-kinase adaptor protein 1 (COMP)	CG16932	Eps-15	PAIN	FBgn0035060	Eps-15 Eps-15 vesicle-mediated transport,synaptic vesicle endocytosis,receptor-mediated endocytosis,neurotransmitter secretion	ENSG00000127527 EPS15L1 Epidermal growth factor receptor substrate 15-like 1 (I, HOMG_31881)	ENSG00000085832 EPS15 Epidermal growth factor receptor substrate 15 (OMCL_OG2_72738, I); ENSG00000127527 EPS15L1 Epidermal growth factor receptor substrate 15-like 1 (OMCL_OG2_72738)	ENSMUSG00000006276 Eps15l1 Epidermal growth factor receptor substrate 15-like 1 (I, HOMG_31881)	ENSMUSG00000028552 Eps15 Epidermal growth factor receptor substrate 15 (OMCL_OG2_72738, I); ENSMUSG00000006276 Eps15l1 Epidermal growth factor receptor substrate 15-like 1 (OMCL_OG2_72738)
CG31317	stumps	BP	FBgn0020299	stumps stumps open tracheal system development,mesoderm development,fibroblast growth factor receptor signaling pathway,gastrulation,primary branching, open tracheal system,mesoderm migration,epithelial cell migration, open tracheal system,mesodermal cell migration,heart development,morphogenesis of a branching structure,oogenesis	ENSG00000155629 PIK3AP1 phosphoinositide-3-kinase adaptor protein 1 (OMCL_OG2_81374)	ENSG00000155629 PIK3AP1 phosphoinositide-3-kinase adaptor protein 1 (COMP); ENSG00000153064 BANK1 B-cell scaffold protein with ankyrin repeats (COMP)	ENSMUSG00000025017 Pik3ap1 phosphoinositide-3-kinase adaptor protein 1 (OMCL_OG2_81374)	ENSMUSG00000037922 Bank1 B-cell scaffold protein with ankyrin repeats (COMP); ENSMUSG00000025017 Pik3ap1 phosphoinositide-3-kinase adaptor protein 1 (COMP)	CG2713	CG2713	PAIN	FBgn0250874	ttm50 tiny tim 50 mitosis,mitochondrion organization and biogenesis	ENSG00000105197 TIMM50 Import inner membrane translocase subunit TIM50, mitochondrial precursor (HOMG_57031, I)	ENSG00000105197 TIMM50 Import inner membrane translocase subunit TIM50, mitochondrial precursor (OMCL_OG2_72726, COMP)	ENSMUSG00000003438 Timm50 Import inner membrane translocase subunit TIM50, mitochondrial precursor (HOMG_57031, I)	ENSMUSG00000003438 Timm50 Import inner membrane translocase subunit TIM50, mitochondrial precursor (OMCL_OG2_72726, COMP)
CG32016	CG32016	PAIN	FBgn0052016	CG32016 CG32016	ENSG00000184708 EIF4ENIF1 Eukaryotic translation initiation factor 4E transporter (OMCL_OG2_82543, COMP)	-	ENSMUSG00000020454 Eif4enif1 Eukaryotic translation initiation factor 4E transporter (OMCL_OG2_82543, COMP, I)	-	CG31666	CG31666	BP	FBgn0086758	chinmo Chronologically inappropriate morphogenesis mushroom body development,dendrite morphogenesis	ENSG00000173276 ZNF295 Zinc finger protein 295 (I)	-	ENSMUSG00000046962 Zfp295 zinc finger protein 295 isoform 2 (I)	-
CG32016	CG32016	PAIN	FBgn0052016	CG32016 CG32016	ENSG00000184708 EIF4ENIF1 Eukaryotic translation initiation factor 4E transporter (OMCL_OG2_82543, COMP)	-	ENSMUSG00000020454 Eif4enif1 Eukaryotic translation initiation factor 4E transporter (OMCL_OG2_82543, COMP, I)	-	CG4818	Cpr72Ea	BP	FBgn0036617	Cpr72Ea Cuticular protein 72Ea	-	-	-	-
CG32016	CG32016	PAIN	FBgn0052016	CG32016 CG32016	ENSG00000184708 EIF4ENIF1 Eukaryotic translation initiation factor 4E transporter (OMCL_OG2_82543, COMP)	-	ENSMUSG00000020454 Eif4enif1 Eukaryotic translation initiation factor 4E transporter (OMCL_OG2_82543, COMP, I)	-	CG7398	Trn	BP	FBgn0024921	Trn Transportin phagocytosis, engulfment,protein import into nucleus, docking,protein import into nucleus	ENSG00000083312 TNPO1 Transportin-1 (I, HOMG_5358)	ENSG00000105576 TNPO2 Transportin-2 (OMCL_OG2_71591, COMP, I); ENSG00000083312 TNPO1 Transportin-1 (OMCL_OG2_71591, COMP)	ENSMUSG00000009470 Tnpo1 Transportin-1 (I, HOMG_5358)	ENSMUSG00000031691 Tnpo2 Transportin-2 (OMCL_OG2_71591, COMP, I); ENSMUSG00000009470 Tnpo1 Transportin-1 (OMCL_OG2_71591, COMP)
CG32016	CG32016	PAIN	FBgn0052016	CG32016 CG32016	ENSG00000184708 EIF4ENIF1 Eukaryotic translation initiation factor 4E transporter (OMCL_OG2_82543, COMP)	-	ENSMUSG00000020454 Eif4enif1 Eukaryotic translation initiation factor 4E transporter (OMCL_OG2_82543, COMP, I)	-	CG17946	Mst84Da	BP	FBgn0004172	Mst84Da Male-specific RNA 84Da	-	-	-	-
CG32016	CG32016	PAIN	FBgn0052016	CG32016 CG32016	ENSG00000184708 EIF4ENIF1 Eukaryotic translation initiation factor 4E transporter (OMCL_OG2_82543, COMP)	-	ENSMUSG00000020454 Eif4enif1 Eukaryotic translation initiation factor 4E transporter (OMCL_OG2_82543, COMP, I)	-	CG15422	CG15422	BP	FBgn0031579	CG15422 CG15422 pathogenesis	-	-	-	-
CG32016	CG32016	PAIN	FBgn0052016	CG32016 CG32016	ENSG00000184708 EIF4ENIF1 Eukaryotic translation initiation factor 4E transporter (OMCL_OG2_82543, COMP)	-	ENSMUSG00000020454 Eif4enif1 Eukaryotic translation initiation factor 4E transporter (OMCL_OG2_82543, COMP, I)	-	CG2216	Fer1HCH	BP	FBgn0015222	Fer1HCH Ferritin 1 heavy chain homologue cellular iron ion homeostasis,iron ion transport	-	ENSG00000167996 FTH1 Ferritin heavy chain (OMCL_OG2_72074)	-	ENSMUSG00000024661 Fth1 Ferritin heavy chain (OMCL_OG2_72074)
CG32016	CG32016	PAIN	FBgn0052016	CG32016 CG32016	ENSG00000184708 EIF4ENIF1 Eukaryotic translation initiation factor 4E transporter (OMCL_OG2_82543, COMP)	-	ENSMUSG00000020454 Eif4enif1 Eukaryotic translation initiation factor 4E transporter (OMCL_OG2_82543, COMP, I)	-	CG9036	Cpr56F	BP	FBgn0034499	Cpr56F Cuticular protein 56F	-	-	-	-
CG32016	CG32016	PAIN	FBgn0052016	CG32016 CG32016	ENSG00000184708 EIF4ENIF1 Eukaryotic translation initiation factor 4E transporter (OMCL_OG2_82543, COMP)	-	ENSMUSG00000020454 Eif4enif1 Eukaryotic translation initiation factor 4E transporter (OMCL_OG2_82543, COMP, I)	-	CG9610	Poxm	BP	FBgn0003129	Poxm Pox meso multicellular organismal development,regulation of transcription	ENSG00000198807 PAX9 Paired box protein Pax-9 (OMCL_OG2_80574, HOMG_31360); ENSG00000125813 PAX1 Paired box protein Pax-1 (I)	ENSG00000198807 PAX9 Paired box protein Pax-9 (I)	ENSMUSG00000001497 Pax9 Paired box protein Pax-9 (OMCL_OG2_80574, I, HOMG_31360); ENSMUSG00000037034 Pax1 Paired box protein Pax-1 (I)	ENSMUSG00000001497 Pax9 Paired box protein Pax-9 (I); ENSMUSG00000037034 Pax1 Paired box protein Pax-1 (I)
CG32016	CG32016	PAIN	FBgn0052016	CG32016 CG32016	ENSG00000184708 EIF4ENIF1 Eukaryotic translation initiation factor 4E transporter (OMCL_OG2_82543, COMP)	-	ENSMUSG00000020454 Eif4enif1 Eukaryotic translation initiation factor 4E transporter (OMCL_OG2_82543, COMP, I)	-	CG32491	mod(mdg4)	BP	FBgn0002781	mod(mdg4) modifier of mdg4 regulation of chromatin assembly or disassembly,establishment and/or maintenance of chromatin architecture,regulation of apoptosis,induction of apoptosis,germ cell migration,male meiosis I,male meiosis chromosome segregation,nuclear organization and biogenesis,oogenesis	-	ENSG00000181722 ZBTB20 Zinc finger and BTB domain-containing protein 20 (COMP); ENSG00000119574 ZBTB45 Zinc finger and BTB domain-containing protein 45 (COMP)	-	ENSMUSG00000022708 Zbtb20 zinc finger and BTB domain containing 20 (COMP); ENSMUSG00000049600 Zbtb45 zinc finger and BTB domain containing 45 (COMP)
CG32016	CG32016	PAIN	FBgn0052016	CG32016 CG32016	ENSG00000184708 EIF4ENIF1 Eukaryotic translation initiation factor 4E transporter (OMCL_OG2_82543, COMP)	-	ENSMUSG00000020454 Eif4enif1 Eukaryotic translation initiation factor 4E transporter (OMCL_OG2_82543, COMP, I)	-	CG17489	RpL5	BP	FBgn0064225	RpL5 Ribosomal protein L5 translation	ENSG00000122406 RPL5 60S ribosomal protein L5 (COMP, I, OMCL_OG2_71402)	ENSG00000183898 \N \N (I)	ENSMUSG00000058558 Rpl5 60S ribosomal protein L5 (COMP, I); ENSMUSG00000059478 (HOMG_90823)	MGI:3647110 EG665407 predicted gene, EG665407 (I); ENSMUSG00000059478 (OMCL_OG2_71402); ENSMUSG00000058558 Rpl5 60S ribosomal protein L5 (OMCL_OG2_71402); ENSMUSG00000062131 \N \N (OMCL_OG2_71402)
CG32016	CG32016	PAIN	FBgn0052016	CG32016 CG32016	ENSG00000184708 EIF4ENIF1 Eukaryotic translation initiation factor 4E transporter (OMCL_OG2_82543, COMP)	-	ENSMUSG00000020454 Eif4enif1 Eukaryotic translation initiation factor 4E transporter (OMCL_OG2_82543, COMP, I)	-	CG8854	CG8854	BP	FBgn0033702	CG8854 CG8854	-	-	-	-
CG32016	CG32016	PAIN	FBgn0052016	CG32016 CG32016	ENSG00000184708 EIF4ENIF1 Eukaryotic translation initiation factor 4E transporter (OMCL_OG2_82543, COMP)	-	ENSMUSG00000020454 Eif4enif1 Eukaryotic translation initiation factor 4E transporter (OMCL_OG2_82543, COMP, I)	-	CG3629	Dll	BP	FBgn0000157	Dll Distal-less imaginal disc-derived limb morphogenesis,proboscis development,specification of organ identity,proximal/distal pattern formation, imaginal disc,regulation of transcription, DNA-dependent,analia development,imaginal disc-derived male genitalia development,leg disc proximal/distal pattern formation,genital disc development,leg morphogenesis,proximal/distal pattern formation,antennal…	ENSG00000115844 DLX2 Homeobox protein DLX-2 (I, HOMG_3244); ENSG00000144355 DLX1 Homeobox protein DLX-1 (OMCL_OG2_78326)	ENSG00000064195 DLX3 Homeobox protein DLX-3 (I); ENSG00000105880 DLX5 Homeobox protein DLX-5 (I)	ENSMUSG00000023391 Dlx2 Homeobox protein DLX-2 (I, HOMG_3244); ENSMUSG00000041911 Dlx1 Homeobox protein DLX-1 (OMCL_OG2_78326, I)	ENSMUSG00000029755 Dlx5 Homeobox protein DLX-5 (I); ENSMUSG00000001510 Dlx3 Homeobox protein DLX-3 (I)
CG32016	CG32016	PAIN	FBgn0052016	CG32016 CG32016	ENSG00000184708 EIF4ENIF1 Eukaryotic translation initiation factor 4E transporter (OMCL_OG2_82543, COMP)	-	ENSMUSG00000020454 Eif4enif1 Eukaryotic translation initiation factor 4E transporter (OMCL_OG2_82543, COMP, I)	-	CG17420	RpL15	BP	FBgn0028697	RpL15 Ribosomal protein L15 translation	ENSG00000174748 RPL15 60S ribosomal protein L15 (HOMG_84709)	ENSG00000174748 RPL15 60S ribosomal protein L15 (OMCL_OG2_71226, COMP); ENSG00000174766 NP_0010830591 similar to ribosomal protein L15 , mRNA (OMCL_OG2_71226, COMP); ENSG00000212802 Q5T6E0_HUMAN Ribosomal protein L15 pseudogene 3 (COMP); ENSG00000215003 \N \N (COMP)	ENSMUSG00000061167 Rpl15 60S ribosomal protein L15 (I); ENSMUSG00000012405 Rpl15 60S ribosomal protein L15 (I); 100043209 LOC100043209 (HOMG_84709)	ENSMUSG00000073229 EG628994 Ribosomal protein L15 (OMCL_OG2_71226, I, COMP); ENSMUSG00000012405 Rpl15 60S ribosomal protein L15 (OMCL_OG2_71226, COMP); ENSMUSG00000059565 \N \N (I, COMP); ENSMUSG00000078377 \N \N (I, COMP); ENSMUSG00000057262 \N \N (OMCL_OG2_71226); ENSMUSG00000080020 \N \N (COMP); ENSMUSG00000061167 Rpl15 60S ribosomal protein L15 (COMP); ENSMUSG00000066834 (OMCL_OG2_71226)
CG32016	CG32016	PAIN	FBgn0052016	CG32016 CG32016	ENSG00000184708 EIF4ENIF1 Eukaryotic translation initiation factor 4E transporter (OMCL_OG2_82543, COMP)	-	ENSMUSG00000020454 Eif4enif1 Eukaryotic translation initiation factor 4E transporter (OMCL_OG2_82543, COMP, I)	-	CG7808	RpS8	BP	FBgn0039713	RpS8 Ribosomal protein S8 translation	ENSG00000142937 RPS8 40S ribosomal protein S8 (OMCL_OG2_71205, HOMG_100607, COMP, I)	-	MGI:98166 Rps8 ribosomal protein S8 (I); ENSMUSG00000060198 OTTMUSG00000000623 Novel protein similar to ribosomal protein S8 (I); ENSMUSG00000047675 Rps8 40S ribosomal protein S8 (I)	ENSMUSG00000071303 \N \N (OMCL_OG2_71205, I, COMP); ENSMUSG00000047675 Rps8 40S ribosomal protein S8 (OMCL_OG2_71205, HOMG_100607, COMP); ENSMUSG00000060198 OTTMUSG00000000623 Novel protein similar to ribosomal protein S8 (OMCL_OG2_71205, COMP); ENSMUSG00000066626 \N \N (I, COMP); ENSMUSG00000074547 \N \N (I, COMP); MGI:3647258 EG330948 predicted gene, EG330948 (I); 100040298 LOC100040298 (HOMG_1…
CG32016	CG32016	PAIN	FBgn0052016	CG32016 CG32016	ENSG00000184708 EIF4ENIF1 Eukaryotic translation initiation factor 4E transporter (OMCL_OG2_82543, COMP)	-	ENSMUSG00000020454 Eif4enif1 Eukaryotic translation initiation factor 4E transporter (OMCL_OG2_82543, COMP, I)	-	CG6046	Bin1	BP	FBgn0024491	Bin1 Bicoid interacting protein 1 negative regulation of transcription from RNA polymerase II promoter,negative regulation of transcription, DNA-dependent	ENSG00000150459 SAP18 Histone deacetylase complex subunit SAP18 (HOMG_4289, COMP, I)	ENSG00000150459 SAP18 Histone deacetylase complex subunit SAP18 (OMCL_OG2_74232)	ENSMUSG00000061104 Sap18 Histone deacetylase complex subunit SAP18 (I); ENSMUSG00000021963 Sap18 Histone deacetylase complex subunit SAP18 (I); MGI:1277978 Sap18 Sin3-associated polypeptide 18 (I)	ENSMUSG00000021963 Sap18 Histone deacetylase complex subunit SAP18 (OMCL_OG2_74232, HOMG_4289, COMP); ENSMUSG00000061104 Sap18 Histone deacetylase complex subunit SAP18 (OMCL_OG2_74232, COMP); 100041953 LOC100041953 (HOMG_4289)
CG32016	CG32016	PAIN	FBgn0052016	CG32016 CG32016	ENSG00000184708 EIF4ENIF1 Eukaryotic translation initiation factor 4E transporter (OMCL_OG2_82543, COMP)	-	ENSMUSG00000020454 Eif4enif1 Eukaryotic translation initiation factor 4E transporter (OMCL_OG2_82543, COMP, I)	-	CG13114	CG13114	BP	FBgn0032127	CG13114 CG13114	-	-	-	-
CG32016	CG32016	PAIN	FBgn0052016	CG32016 CG32016	ENSG00000184708 EIF4ENIF1 Eukaryotic translation initiation factor 4E transporter (OMCL_OG2_82543, COMP)	-	ENSMUSG00000020454 Eif4enif1 Eukaryotic translation initiation factor 4E transporter (OMCL_OG2_82543, COMP, I)	-	CG17166	mRpL39	BP	FBgn0036462	mRpL39 mitochondrial ribosomal protein L39 threonyl-tRNA aminoacylation,translation	ENSG00000154719 MRPL39 Mitochondrial 39S ribosomal protein L39 (OMCL_OG2_79838, COMP, I, HOMG_9679)	-	ENSMUSG00000022889 Mrpl39 Mitochondrial 39S ribosomal protein L39 (OMCL_OG2_79838, COMP, I, HOMG_9679)	-
CG32025	desert	PAIN	FBgn0040229	desert desert	-	-	-	-	CG2411	ptc	BP	FBgn0003892	ptc patched regulation of mitotic cell cycle,eye-antennal disc morphogenesis,smoothened signaling pathway,embryonic pattern specification,regulation of protein import into nucleus,imaginal disc-derived wing morphogenesis,proteolysis,anterior/posterior lineage restriction, imaginal disc,ovarian follicle cell development,anterior/posterior pattern formation,germ-line stem cell division,negative reg…	ENSG00000185920 PTCH1 Protein patched homolog 1 (HOMG_223, I)	ENSG00000117425 PTCH2 Protein patched homolog 2 (OMCL_OG2_74754, I, COMP); ENSG00000185920 PTCH1 Protein patched homolog 1 (OMCL_OG2_74754, COMP)	ENSMUSG00000021466 Ptch1 Protein patched homolog 1 (HOMG_223, I)	ENSMUSG00000028681 Ptch2 Protein patched homolog 2 (OMCL_OG2_74754, I, COMP); ENSMUSG00000021466 Ptch1 Protein patched homolog 1 (OMCL_OG2_74754, COMP)
CG3213	CG3213	PAIN	FBgn0031545	CG3213 CG3213 translation	-	-	-	-	CG10103	CG10103	BP	FBgn0035715	CG10103 CG10103	ENSG00000182149 KIAA0174 Uncharacterized protein KIAA0174 (OMCL_OG2_72950, COMP, I, HOMG_8849)	-	ENSMUSG00000031729 2400003C14Rik Uncharacterized protein KIAA0174 (OMCL_OG2_72950, COMP, I, HOMG_8849)	-
CG3213	CG3213	PAIN	FBgn0031545	CG3213 CG3213 translation	-	-	-	-	CG15580	CG15580	BP	FBgn0037398	CG15580 CG15580	-	ENSG00000146221 TCTE1 t-complex-associated testis expressed 1 (COMP)	-	ENSMUSG00000023949 Tcte1 t-complex-associated testis expressed 1 (COMP)
CG3213	CG3213	PAIN	FBgn0031545	CG3213 CG3213 translation	-	-	-	-	CG14540	CG14540	BP	FBgn0039398	CG14540 CG14540	-	-	-	-
CG3213	CG3213	PAIN	FBgn0031545	CG3213 CG3213 translation	-	-	-	-	CG34404	CG34404	BP	FBgn0085433	CG34404	ENSG00000171444 MCC Colorectal mutant cancer protein (HOMG_20539, I, OMCL_OG2_83801)	ENSG00000130307 USHBP1 USH1C-binding protein 1 (COMP); ENSG00000171444 MCC Colorectal mutant cancer protein (COMP)	ENSMUSG00000071856 Mcc mutated in colorectal cancers isoform 1 (I, OMCL_OG2_83801)	ENSMUSG00000034911 Ushbp1 USH1C-binding protein 1 (COMP); ENSMUSG00000071856 Mcc mutated in colorectal cancers isoform 1 (COMP)
CG3217	CkIIalpha-i3	BP	FBgn0025676	CkIIalpha-i3 CKII-Î± subunit interactor-3	-	-	-	-	CG2257	Ubc-E2H	PAIN	FBgn0029996	Ubc-E2H Ubc-E2H regulation of protein metabolic process,post-translational protein modification	ENSG00000186591 UBE2H Ubiquitin-conjugating enzyme E2 H (HOMG_103894, COMP, I, OMCL_OG2_72453)	-	ENSMUSG00000039159 Ube2h Ubiquitin-conjugating enzyme E2 H (HOMG_103894, I, OMCL_OG2_72453)	ENSMUSG00000039159 Ube2h Ubiquitin-conjugating enzyme E2 H (COMP); ENSMUSG00000074903 \N \N (COMP)
CG3217	CkIIalpha-i3	BP	FBgn0025676	CkIIalpha-i3 CKII-Î± subunit interactor-3	-	-	-	-	CG11893	CG11893	PAIN	FBgn0039316	CG11893 CG11893	-	-	-	-
CG3217	CkIIalpha-i3	BP	FBgn0025676	CkIIalpha-i3 CKII-Î± subunit interactor-3	-	-	-	-	CG15884	Cpr97Eb	PAIN	FBgn0039481	Cpr97Eb Cuticular protein 97Eb	-	-	-	-
CG3217	CkIIalpha-i3	BP	FBgn0025676	CkIIalpha-i3 CKII-Î± subunit interactor-3	-	-	-	-	CG2371	CG2371	PAIN	FBgn0030323	CG2371 CG2371	ENSG00000145781 COMMD10 COMM domain-containing protein 10 (OMCL_OG2_80120, COMP, I)	-	ENSMUSG00000042705 Commd10 COMM domain-containing protein 10 (OMCL_OG2_80120, COMP, I)	-
CG3217	CkIIalpha-i3	BP	FBgn0025676	CkIIalpha-i3 CKII-Î± subunit interactor-3	-	-	-	-	CG6972	CG6972	PAIN	FBgn0039008	CG6972 CG6972	ENSG00000100418 NP_0565191 DJ347H134 protein (COMP)	ENSG00000167280 NP_0010360381 endo-beta-N-acetylglucosaminidase (OMCL_OG2_71252); ENSG00000100418 NP_0565191 DJ347H134 protein (OMCL_OG2_71252)	ENSMUSG00000022472 D15Wsu75e Adult male testis cDNA, RIKEN full-length enriched library, clone:1700013M01 product:hypothetical protein, full insert sequence CRL-1722 L5178Y-R cDNA, RIKEN full-length enriched library, clone: (COMP)	ENSMUSG00000033857 D230014K01Rik endo-beta-N-acetylglucosaminidase (OMCL_OG2_71252); ENSMUSG00000022472 D15Wsu75e Adult male testis cDNA, RIKEN full-length enriched library, clone:1700013M01 product:hypothetical protein, full insert sequence CRL-1722 L5178Y-R cDNA, RIKEN full-length enriched library, clone: (OMCL_OG2_71252)
CG32176	CG32176	PAIN	FBgn0052176	CG32176 CG32176	-	-	-	-	CG8933	exd	BP	FBgn0000611	exd extradenticle brain development,leg disc proximal/distal pattern formation,regulation of transcription, DNA-dependent,salivary gland boundary specification,oenocyte development	ENSG00000185630 PBX1 Pre-B-cell leukemia transcription factor 1 (HOMG_20574, I)	ENSG00000167081 PBX3 Pre-B-cell leukemia transcription factor 3 (I, COMP, OMCL_OG2_74006); ENSG00000204304 PBX2 Pre-B-cell leukemia transcription factor 2 (I, COMP, OMCL_OG2_74006); ENSG00000185630 PBX1 Pre-B-cell leukemia transcription factor 1 (COMP, OMCL_OG2_74006); ENSG00000206247 PBX2_HUMAN Pre-B-cell leukemia transcription factor 2 (I, OMCL_OG2_74006); ENSG00000181814 \N \N (I, OMCL_OG2_740…	ENSMUSG00000052534 Pbx1 Pre-B-cell leukemia transcription factor 1 (HOMG_20574, I)	ENSMUSG00000038718 Pbx3 Pre-B-cell leukemia transcription factor 3 (I, COMP, OMCL_OG2_74006); ENSMUSG00000034673 Pbx2 Pre-B-cell leukemia transcription factor 2 (I, COMP, OMCL_OG2_74006); ENSMUSG00000052534 Pbx1 Pre-B-cell leukemia transcription factor 1 (COMP, OMCL_OG2_74006); ENSMUSG00000031860 Pbx4 Pre-B-cell leukemia transcription factor 4 (COMP)
CG32183	Ccn	BP	FBgn0052183	Ccn Ccn	ENSG00000118523 CTGF Connective tissue growth factor precursor (I, OMCL_OG2_81708)	ENSG00000112761 WISP3 WNT1-inducible-signaling pathway protein 3 precursor (I, COMP); ENSG00000104415 WISP1 WNT1-inducible-signaling pathway protein 1 precursor (I, COMP); ENSG00000142871 CYR61 Protein CYR61 precursor (I, COMP); ENSG00000136999 NOV Protein NOV homolog precursor (I, COMP); ENSG00000064205 WISP2 WNT1-inducible-signaling pathway protein 2 precursor (I, COMP); ENSG00000118523 CTGF Co…	ENSMUSG00000019997 Ctgf Connective tissue growth factor precursor (I, OMCL_OG2_81708)	ENSMUSG00000037362 Nov Protein NOV homolog precursor (I, COMP); ENSMUSG00000027656 Wisp2 WNT1-inducible-signaling pathway protein 2 precursor (I, COMP); ENSMUSG00000005124 Wisp1 WNT1-inducible-signaling pathway protein 1 precursor (I, COMP); ENSMUSG00000028195 Cyr61 Protein CYR61 precursor (I, COMP); ENSMUSG00000019997 Ctgf Connective tissue growth factor precursor (COMP); ENSMUSG00000062074 \N \…	CG4799	Pen	PAIN	FBgn0011823	Pen Pendulin protein import into nucleus, docking,sperm individualization,gravitaxis,cell proliferation,NLS-bearing substrate import into nucleus,lymph gland development,cytoplasmic transport,protein import into nucleus,cytoplasmic transport, nurse cell to oocyte,ovarian ring canal formation	ENSG00000182481 KPNA2 Importin subunit alpha-2 (OMCL_OG2_76621, I)	ENSG00000182481 KPNA2 Importin subunit alpha-2 (HOMG_1708, COMP); ENSG00000185467 A4D277_HUMAN Similar to importin alpha 1b (I, COMP); ENSG00000214180 \N \N (COMP); ENSG00000215769 IMA2_HUMAN Importin subunit alpha-2 (COMP); ENSG00000214035 NP_0010390111 similar to Importin alpha-2 subunit , mRNA (COMP); 728860 LOC728860 (HOMG_1708)	ENSMUSG00000018362 Kpna2 Importin subunit alpha-2 (I)	ENSMUSG00000018362 Kpna2 Importin subunit alpha-2 (OMCL_OG2_76621, HOMG_1708, COMP); ENSMUSG00000050278 (OMCL_OG2_76621); ENSMUSG00000069083 \N \N (OMCL_OG2_76621); ENSMUSG00000038770 AW146299 expressed sequence AW146299 , mRNA (COMP); 100043906 LOC100043906 (HOMG_1708); 100039592 LOC100039592 (HOMG_1708); ENSMUSG00000066878 \N \N (OMCL_OG2_76621)
CG32183	Ccn	BP	FBgn0052183	Ccn Ccn	ENSG00000118523 CTGF Connective tissue growth factor precursor (I, OMCL_OG2_81708)	ENSG00000112761 WISP3 WNT1-inducible-signaling pathway protein 3 precursor (I, COMP); ENSG00000104415 WISP1 WNT1-inducible-signaling pathway protein 1 precursor (I, COMP); ENSG00000142871 CYR61 Protein CYR61 precursor (I, COMP); ENSG00000136999 NOV Protein NOV homolog precursor (I, COMP); ENSG00000064205 WISP2 WNT1-inducible-signaling pathway protein 2 precursor (I, COMP); ENSG00000118523 CTGF Co…	ENSMUSG00000019997 Ctgf Connective tissue growth factor precursor (I, OMCL_OG2_81708)	ENSMUSG00000037362 Nov Protein NOV homolog precursor (I, COMP); ENSMUSG00000027656 Wisp2 WNT1-inducible-signaling pathway protein 2 precursor (I, COMP); ENSMUSG00000005124 Wisp1 WNT1-inducible-signaling pathway protein 1 precursor (I, COMP); ENSMUSG00000028195 Cyr61 Protein CYR61 precursor (I, COMP); ENSMUSG00000019997 Ctgf Connective tissue growth factor precursor (COMP); ENSMUSG00000062074 \N \…	CG2158	CG2158	PAIN	FBgn0033264	CG2158 CG2158 phagocytosis, engulfment,intracellular transport	ENSG00000093000 NUP50 Nucleoporin 50 kDa (HOMG_5190, COMP, I)	ENSG00000189235 \N \N (I, OMCL_OG2_76535); ENSG00000093000 NUP50 Nucleoporin 50 kDa (OMCL_OG2_76535)	ENSMUSG00000016619 Nup50 Nucleoporin 50 kDa (HOMG_5190, I, OMCL_OG2_76535)	ENSMUSG00000072878 1700123L14Rik RIKEN cDNA 1700123L14 gene on chromosome 6 (I, COMP); ENSMUSG00000016619 Nup50 Nucleoporin 50 kDa (COMP)
CG3225	CG3225	BP	FBgn0031631	CG3225 CG3225 nuclear mRNA splicing, via spliceosome	ENSG00000101452 DHX35 Probable ATP-dependent RNA helicase DHX35 (I, OMCL_OG2_75907, HOMG_6406)	-	ENSMUSG00000027655 Dhx35 DEAH box polypeptide 35 (I, OMCL_OG2_75907, HOMG_6406)	-	CG4799	Pen	PAIN	FBgn0011823	Pen Pendulin protein import into nucleus, docking,sperm individualization,gravitaxis,cell proliferation,NLS-bearing substrate import into nucleus,lymph gland development,cytoplasmic transport,protein import into nucleus,cytoplasmic transport, nurse cell to oocyte,ovarian ring canal formation	ENSG00000182481 KPNA2 Importin subunit alpha-2 (OMCL_OG2_76621, I)	ENSG00000182481 KPNA2 Importin subunit alpha-2 (HOMG_1708, COMP); ENSG00000185467 A4D277_HUMAN Similar to importin alpha 1b (I, COMP); ENSG00000214180 \N \N (COMP); ENSG00000215769 IMA2_HUMAN Importin subunit alpha-2 (COMP); ENSG00000214035 NP_0010390111 similar to Importin alpha-2 subunit , mRNA (COMP); 728860 LOC728860 (HOMG_1708)	ENSMUSG00000018362 Kpna2 Importin subunit alpha-2 (I)	ENSMUSG00000018362 Kpna2 Importin subunit alpha-2 (OMCL_OG2_76621, HOMG_1708, COMP); ENSMUSG00000050278 (OMCL_OG2_76621); ENSMUSG00000069083 \N \N (OMCL_OG2_76621); ENSMUSG00000038770 AW146299 expressed sequence AW146299 , mRNA (COMP); 100043906 LOC100043906 (HOMG_1708); 100039592 LOC100039592 (HOMG_1708); ENSMUSG00000066878 \N \N (OMCL_OG2_76621)
CG32381	unc-13-4A	PAIN	FBgn0035756	unc-13-4A unc-13-4A synaptic vesicle priming,neurotransmitter secretion	ENSG00000007516 BAIAP3 BAI1-associated protein 3 (I, HOMG_20844)	ENSG00000007516 BAIAP3 BAI1-associated protein 3 (COMP, OMCL_OG2_76911); ENSG00000092929 UNC13D Unc-13 homolog D (COMP, OMCL_OG2_76911)	ENSMUSG00000047507 Baiap3 BAI1-associated protein 3 (I); ENSMUSG00000057948 Unc13d unc-13 homolog D (I)	ENSMUSG00000047507 Baiap3 BAI1-associated protein 3 (COMP, OMCL_OG2_76911); ENSMUSG00000057948 Unc13d unc-13 homolog D (COMP, OMCL_OG2_76911)	CG7186	SAK	BP	FBgn0026371	SAK SAK centrosome duplication,protein amino acid phosphorylation,centriole replication,mitotic spindle organization and biogenesis,sperm axoneme assembly	ENSG00000142731 PLK4 Serine/threonine-protein kinase PLK4 (OMCL_OG2_78587, COMP, I, HOMG_7962)	-	ENSMUSG00000025758 Plk4 Serine/threonine-protein kinase PLK4 (OMCL_OG2_78587, COMP, I, HOMG_7962)	-
CG32381	unc-13-4A	PAIN	FBgn0035756	unc-13-4A unc-13-4A synaptic vesicle priming,neurotransmitter secretion	ENSG00000007516 BAIAP3 BAI1-associated protein 3 (I, HOMG_20844)	ENSG00000007516 BAIAP3 BAI1-associated protein 3 (COMP, OMCL_OG2_76911); ENSG00000092929 UNC13D Unc-13 homolog D (COMP, OMCL_OG2_76911)	ENSMUSG00000047507 Baiap3 BAI1-associated protein 3 (I); ENSMUSG00000057948 Unc13d unc-13 homolog D (I)	ENSMUSG00000047507 Baiap3 BAI1-associated protein 3 (COMP, OMCL_OG2_76911); ENSMUSG00000057948 Unc13d unc-13 homolog D (COMP, OMCL_OG2_76911)	CG8128	CG8128	BP	FBgn0030668	CG8128 CG8128	ENSG00000170917 NUDT6 Nucleoside diphosphate-linked moiety X motif 6 (HOMG_31425, OMCL_OG2_74481, COMP, I)	-	ENSMUSG00000050174 Nudt6 Nucleoside diphosphate-linked moiety X motif 6 (HOMG_31425, OMCL_OG2_74481, COMP, I)	MGI:3645967 EG628894 predicted gene, EG628894 (I)
CG32381	unc-13-4A	PAIN	FBgn0035756	unc-13-4A unc-13-4A synaptic vesicle priming,neurotransmitter secretion	ENSG00000007516 BAIAP3 BAI1-associated protein 3 (I, HOMG_20844)	ENSG00000007516 BAIAP3 BAI1-associated protein 3 (COMP, OMCL_OG2_76911); ENSG00000092929 UNC13D Unc-13 homolog D (COMP, OMCL_OG2_76911)	ENSMUSG00000047507 Baiap3 BAI1-associated protein 3 (I); ENSMUSG00000057948 Unc13d unc-13 homolog D (I)	ENSMUSG00000047507 Baiap3 BAI1-associated protein 3 (COMP, OMCL_OG2_76911); ENSMUSG00000057948 Unc13d unc-13 homolog D (COMP, OMCL_OG2_76911)	CG11525	CycG	BP	FBgn0039858	CycG Cyclin G	ENSG00000138764 CCNG2 Cyclin-G2 (OMCL_OG2_78751, HOMG_3208, I)	ENSG00000113328 CCNG1 Cyclin-G1 (I, COMP); ENSG00000138764 CCNG2 Cyclin-G2 (COMP)	ENSMUSG00000029385 Ccng2 Cyclin-G2 (OMCL_OG2_78751, HOMG_3208, I)	ENSMUSG00000020326 Ccng1 Cyclin-G1 (I, COMP); ENSMUSG00000029385 Ccng2 Cyclin-G2 (COMP)
CG32381	unc-13-4A	PAIN	FBgn0035756	unc-13-4A unc-13-4A synaptic vesicle priming,neurotransmitter secretion	ENSG00000007516 BAIAP3 BAI1-associated protein 3 (I, HOMG_20844)	ENSG00000007516 BAIAP3 BAI1-associated protein 3 (COMP, OMCL_OG2_76911); ENSG00000092929 UNC13D Unc-13 homolog D (COMP, OMCL_OG2_76911)	ENSMUSG00000047507 Baiap3 BAI1-associated protein 3 (I); ENSMUSG00000057948 Unc13d unc-13 homolog D (I)	ENSMUSG00000047507 Baiap3 BAI1-associated protein 3 (COMP, OMCL_OG2_76911); ENSMUSG00000057948 Unc13d unc-13 homolog D (COMP, OMCL_OG2_76911)	CG9183	plu	BP	FBgn0003114	plu plutonium regulation of mitotic cell cycle,negative regulation of DNA replication,single fertilization,egg activation	-	-	-	-
CG32703	CG32703	PAIN	FBgn0052703	CG32703 CG32703 protein amino acid phosphorylation	ENSG00000181085 MAPK15 Mitogen-activated protein kinase 15 (HOMG_16371, I, OMCL_OG2_71301)	-	ENSMUSG00000063704 Mapk15 Mitogen-activated protein kinase 15 (HOMG_16371, I, OMCL_OG2_71301)	-	CG4184	MED15	BP	FBgn0027592	MED15 Mediator complex subunit 15 transcription initiation from RNA polymerase II promoter	ENSG00000099917 MED15 Positive cofactor 2 glutamine/Q-rich-associated protein Trinucleotide repeat-containing gen (I, HOMG_32283, OMCL_OG2_76718)	-	ENSMUSG00000012114 Med15 Mediator of RNA polymerase II transcription subunit 15 (I, HOMG_32283, OMCL_OG2_76718)	-
CG32809	CG32809	BP	FBgn0023531	CG32809 CG32809	ENSG00000120549 KIAA1217 Sickle tail protein homolog (I)	ENSG00000017373 SNIP_HUMAN p130Cas-associated protein (I, COMP, OMCL_OG2_75323); ENSG00000120549 KIAA1217 Sickle tail protein homolog (COMP, OMCL_OG2_75323)	ENSMUSG00000038453 P140 p130Cas-associated protein (I)	ENSMUSG00000036617 Etl4 Sickle tail protein (I, COMP, OMCL_OG2_75323); ENSMUSG00000038453 P140 p130Cas-associated protein (COMP, OMCL_OG2_75323)	CG1968	CG1968	PAIN	FBgn0033401	CG1968 CG1968	ENSG00000133103 COG6 Conserved oligomeric Golgi complex component 6 (HOMG_10802, COMP, I, OMCL_OG2_73745)	-	ENSMUSG00000027742 Cog6 Conserved oligomeric Golgi complex component 6 (HOMG_10802, COMP, I, OMCL_OG2_73745)	-
CG32809	CG32809	BP	FBgn0023531	CG32809 CG32809	ENSG00000120549 KIAA1217 Sickle tail protein homolog (I)	ENSG00000017373 SNIP_HUMAN p130Cas-associated protein (I, COMP, OMCL_OG2_75323); ENSG00000120549 KIAA1217 Sickle tail protein homolog (COMP, OMCL_OG2_75323)	ENSMUSG00000038453 P140 p130Cas-associated protein (I)	ENSMUSG00000036617 Etl4 Sickle tail protein (I, COMP, OMCL_OG2_75323); ENSMUSG00000038453 P140 p130Cas-associated protein (COMP, OMCL_OG2_75323)	CG18069	CaMKII	PAIN	FBgn0004624	CaMKII Calcium/calmodulin-dependent protein kinase II neuromuscular junction development,courtship behavior,long-term memory,regulation of filopodium formation,protein amino acid phosphorylation,male courtship behavior,synaptic transmission,learning and/or memory	ENSG00000145349 CAMK2D Calcium/calmodulin-dependent protein kinase type II delta chain (HOMG_55561, I)	ENSG00000070808 CAMK2A Calcium/calmodulin-dependent protein kinase type II alpha chain (OMCL_OG2_70655, I); ENSG00000148660 CAMK2G Calcium/calmodulin-dependent protein kinase type II gamma chain (OMCL_OG2_70655, I); ENSG00000058404 CAMK2B Calcium/calmodulin-dependent protein kinase type II beta chain (OMCL_OG2_70655, I); ENSG00000008118 CAMK1G Calcium/calmodulin-dependent protein kinase type 1G (…	ENSMUSG00000053819 Camk2d Calcium/calmodulin-dependent protein kinase type II delta chain (HOMG_55561, I); ENSMUSG00000057897 Camk2b Calcium/calmodulin-dependent protein kinase type II beta chain (I)	ENSMUSG00000057897 Camk2b Calcium/calmodulin-dependent protein kinase type II beta chain (OMCL_OG2_70655, I); ENSMUSG00000021820 Camk2g Calcium/calmodulin-dependent protein kinase type II gamma chain (OMCL_OG2_70655, I); ENSMUSG00000024617 Camk2a Calcium/calmodulin-dependent protein kinase type II alpha chain (OMCL_OG2_70655, I); ENSMUSG00000053819 Camk2d Calcium/calmodulin-dependent protein kina…
CG3291	pcm	PAIN	FBgn0020261	pcm pacman RNA interference,RNA catabolic process,gastrulation,mRNA catabolic process, nonsense-mediated decay	ENSG00000114127 XRN1 5'-3' exoribonuclease 1 (OMCL_OG2_73144, COMP, I, HOMG_5894)	-	ENSMUSG00000032410 Xrn1 5'-3' exoribonuclease 1 (OMCL_OG2_73144, COMP, I, HOMG_5894)	-	CG2116	CG2116	BP	FBgn0030003	CG2116 CG2116	-	-	-	-
CG3298	JhI-1	PAIN	FBgn0028426	JhI-1 Juvenile hormone-inducible protein 1 tRNA splicing,removal of tRNA 3'-trailer sequence	ENSG00000006744 ELAC2 Zinc phosphodiesterase ELAC protein 2 (HOMG_6403, I, OMCL_OG2_71595)	ENSG00000141642 ELAC1 Zinc phosphodiesterase ELAC protein 1 (COMP); ENSG00000006744 ELAC2 Zinc phosphodiesterase ELAC protein 2 (COMP)	ENSMUSG00000020549 Elac2 Zinc phosphodiesterase ELAC protein 2 (HOMG_6403, I, OMCL_OG2_71595)	ENSMUSG00000020549 Elac2 Zinc phosphodiesterase ELAC protein 2 (COMP); ENSMUSG00000036941 Elac1 Zinc phosphodiesterase ELAC protein 1 (COMP)	CG15757	Cpr12A	BP	FBgn0030494	Cpr12A Cuticular protein 12A	-	-	-	-
CG33103	Ppn	BP	FBgn0003137	Ppn Papilin extracellular matrix organization and biogenesis	ENSG00000100767 PAPLN papilin (I, OMCL_OG2_77294, HOMG_71541)	-	ENSMUSG00000021223 Papln papilin (I, OMCL_OG2_77294, HOMG_71541)	-	CG10882	CG10882	PAIN	FBgn0031408	CG10882 CG10882 intracellular protein transport,G-protein coupled receptor protein signaling pathway,ER to Golgi vesicle-mediated transport	ENSG00000176986 SEC24C Protein transport protein Sec24C (HOMG_3615, I)	ENSG00000150961 SEC24D Protein transport protein Sec24D (I, COMP, OMCL_OG2_72998); ENSG00000176986 SEC24C Protein transport protein Sec24C (COMP, OMCL_OG2_72998)	ENSMUSG00000039367 Sec24c SEC24 related gene family, member C (HOMG_3615, I)	ENSMUSG00000039234 Sec24d SEC24 related gene family, member D (I, COMP, OMCL_OG2_72998); ENSMUSG00000039367 Sec24c SEC24 related gene family, member C (COMP, OMCL_OG2_72998)
CG33141	sns	BP	FBgn0024189	sns sticks and stones heterophilic cell adhesion,cell adhesion,larval visceral muscle development,myoblast fusion	ENSG00000161270 PRODH2 Nephrin precursor (I, HOMG_20974)	ENSG00000161270 PRODH2 Nephrin precursor (OMCL_OG2_78852)	ENSMUSG00000006649 Nphs1 Nephrin precursor (I, HOMG_20974); MGI:1859637 Nphs1 nephrosis 1 homolog, nephrin human (I)	ENSMUSG00000006649 Nphs1 Nephrin precursor (OMCL_OG2_78852)	CG14818	CG14818	PAIN	FBgn0026088	CG14818 CG14818 biological_process	ENSG00000171159 C9orf16 UPF0184 protein C9orf16 (COMP, OMCL_OG2_81379)	-	ENSMUSG00000039195 1110008P14Rik UPF0184 protein C9orf16 homolog (COMP, OMCL_OG2_81379)	-
CG33141	sns	BP	FBgn0024189	sns sticks and stones heterophilic cell adhesion,cell adhesion,larval visceral muscle development,myoblast fusion	ENSG00000161270 PRODH2 Nephrin precursor (I, HOMG_20974)	ENSG00000161270 PRODH2 Nephrin precursor (OMCL_OG2_78852)	ENSMUSG00000006649 Nphs1 Nephrin precursor (I, HOMG_20974); MGI:1859637 Nphs1 nephrosis 1 homolog, nephrin human (I)	ENSMUSG00000006649 Nphs1 Nephrin precursor (OMCL_OG2_78852)	CG12645	CG12645	PAIN	FBgn0030181	CG12645 CG12645	-	-	-	-
CG33330	CG33330	BP	FBgn0053330	CG33330 CG33330 biological_process	-	-	-	-	CG30404	Tango11	PAIN	FBgn0050404	Tango11 Transport and Golgi organization biological_process	ENSG00000168958 C2orf33 Uncharacterized protein C2orf33 (COMP, I)	-	ENSMUSG00000026150 5230400G24Rik Uncharacterized protein C2orf33 homolog (COMP, I)	MGI:3645666 EG628871 predicted gene, EG628871 (I)
CG33330	CG33330	BP	FBgn0053330	CG33330 CG33330 biological_process	-	-	-	-	CG2713	CG2713	PAIN	FBgn0250874	ttm50 tiny tim 50 mitosis,mitochondrion organization and biogenesis	ENSG00000105197 TIMM50 Import inner membrane translocase subunit TIM50, mitochondrial precursor (HOMG_57031, I)	ENSG00000105197 TIMM50 Import inner membrane translocase subunit TIM50, mitochondrial precursor (OMCL_OG2_72726, COMP)	ENSMUSG00000003438 Timm50 Import inner membrane translocase subunit TIM50, mitochondrial precursor (HOMG_57031, I)	ENSMUSG00000003438 Timm50 Import inner membrane translocase subunit TIM50, mitochondrial precursor (OMCL_OG2_72726, COMP)
CG33484	zormin	BP	FBgn0052311	zormin zormin	-	-	-	-	CG8849	mRpL24	PAIN	FBgn0031651	mRpL24 mitochondrial ribosomal protein L24 translation	ENSG00000143314 MRPL24 39S ribosomal protein L24, mitochondrial precursor (HOMG_12241, COMP, I, OMCL_OG2_71212)	-	ENSMUSG00000019710 Mrpl24 39S ribosomal protein L24, mitochondrial precursor (HOMG_12241, COMP, I, OMCL_OG2_71212)	-
CG33553	Doa	BP	FBgn0053553	Doa Darkener of apricot chitin-based embryonic cuticle biosynthetic process,compound eye photoreceptor development,photoreceptor cell maintenance,MAPKKK cascade,regulation of alternative nuclear mRNA splicing, via spliceosome,salivary gland cell autophagic cell death,bristle morphogenesis,compound eye development,protein amino acid autophosphorylation,blastoderm segmentation,protein amino acid ph…	ENSG00000176444 CLK2 Dual specificity protein kinase CLK2 (I)	ENSG00000178340 CLK2P CDC-like kinase 2, pseudogene on chromosome 7 (OMCL_OG2_71166, I, COMP); ENSG00000113240 CLK4 Dual specificity protein kinase CLK4 (OMCL_OG2_71166, I, COMP); ENSG00000013441 CLK1 Dual specificity protein kinase CLK1 (OMCL_OG2_71166, I, COMP); ENSG00000179335 CLK3 Dual specificity protein kinase CLK3 (OMCL_OG2_71166, I, COMP); ENSG00000176444 CLK2 Dual specificity protein kin…	ENSMUSG00000068917 Clk2 Dual specificity protein kinase CLK2 (I)	ENSMUSG00000026034 Clk1 Dual specificity protein kinase CLK1 (OMCL_OG2_71166, I, COMP); ENSMUSG00000020385 Clk4 Dual specificity protein kinase CLK4 (OMCL_OG2_71166, I, COMP); ENSMUSG00000032316 Clk3 Dual specificity protein kinase CLK3 (OMCL_OG2_71166, I, COMP); ENSMUSG00000068917 Clk2 Dual specificity protein kinase CLK2 (OMCL_OG2_71166, COMP)	CG11555	CG11555	PAIN	FBgn0086856	CG11555 CG11555	-	-	-	-
CG33670	stg1	BP	FBgn0064123	stg1 stargazin-like protein	ENSG00000006116 CACNG3 Voltage-dependent calcium channel gamma-3 subunit (I)	ENSG00000166862 CACNG2 Voltage-dependent calcium channel gamma-2 subunit (I, COMP); ENSG00000075461 CACNG4 Voltage-dependent calcium channel gamma-4 subunit (I, COMP); ENSG00000142408 CACNG8 Voltage-dependent calcium channel gamma-8 subunit (I, COMP); ENSG00000006116 CACNG3 Voltage-dependent calcium channel gamma-3 subunit (COMP)	ENSMUSG00000040373 Cacng5 Voltage-dependent calcium channel gamma-5 subunit (I)	ENSMUSG00000020723 Cacng4 Voltage-dependent calcium channel gamma-4 subunit (I, COMP); ENSMUSG00000019146 Cacng2 Voltage-dependent calcium channel gamma-2 subunit (I, COMP); ENSMUSG00000053395 Cacng8 Voltage-dependent calcium channel gamma-8 subunit (I, COMP); ENSMUSG00000066189 Cacng3 Voltage-dependent calcium channel gamma-3 subunit (I, COMP); ENSMUSG00000069806 Cacng7 Voltage-dependent calcium…	CG7109	mts	PAIN	FBgn0004177	mts microtubule star regulation of cell shape,phagocytosis, engulfment,protein amino acid dephosphorylation,mitosis,R7 cell fate commitment,actin filament organization,cell adhesion,spindle organization and biogenesis,oogenesis	ENSG00000104695 PPP2CB Serine/threonine-protein phosphatase 2A catalytic subunit beta isoform (I, HOMG_37889)	ENSG00000113575 PPP2CA Serine/threonine-protein phosphatase 2A catalytic subunit alpha isoform (I, COMP, OMCL_OG2_71286); ENSG00000104695 PPP2CB Serine/threonine-protein phosphatase 2A catalytic subunit beta isoform (COMP, OMCL_OG2_71286)	ENSMUSG00000009630 Ppp2cb Serine/threonine-protein phosphatase 2A catalytic subunit beta isoform (I, HOMG_37889)	ENSMUSG00000020349 Ppp2ca Serine/threonine-protein phosphatase 2A catalytic subunit alpha isoform (I, COMP, OMCL_OG2_71286); ENSMUSG00000009630 Ppp2cb Serine/threonine-protein phosphatase 2A catalytic subunit beta isoform (COMP, OMCL_OG2_71286)
CG33670	stg1	BP	FBgn0064123	stg1 stargazin-like protein	ENSG00000006116 CACNG3 Voltage-dependent calcium channel gamma-3 subunit (I)	ENSG00000166862 CACNG2 Voltage-dependent calcium channel gamma-2 subunit (I, COMP); ENSG00000075461 CACNG4 Voltage-dependent calcium channel gamma-4 subunit (I, COMP); ENSG00000142408 CACNG8 Voltage-dependent calcium channel gamma-8 subunit (I, COMP); ENSG00000006116 CACNG3 Voltage-dependent calcium channel gamma-3 subunit (COMP)	ENSMUSG00000040373 Cacng5 Voltage-dependent calcium channel gamma-5 subunit (I)	ENSMUSG00000020723 Cacng4 Voltage-dependent calcium channel gamma-4 subunit (I, COMP); ENSMUSG00000019146 Cacng2 Voltage-dependent calcium channel gamma-2 subunit (I, COMP); ENSMUSG00000053395 Cacng8 Voltage-dependent calcium channel gamma-8 subunit (I, COMP); ENSMUSG00000066189 Cacng3 Voltage-dependent calcium channel gamma-3 subunit (I, COMP); ENSMUSG00000069806 Cacng7 Voltage-dependent calcium…	CG7856	CG7856	PAIN	FBgn0033056	CG7856 CG7856	-	-	-	-
CG3395	RpS9	BP	FBgn0010408	RpS9 Ribosomal protein S9 mitotic spindle organization and biogenesis,translation,mitotic spindle elongation	ENSG00000170889 RPS9 40S ribosomal protein S9 (OMCL_OG2_71542, HOMG_68145, COMP, I)	ENSG00000172887 \N \N (I)	ENSMUSG00000006333 Rps9 40S ribosomal protein S9 (OMCL_OG2_71542, HOMG_68145, COMP, I)	-	CG14506	CG14506	PAIN	FBgn0039659	CG14506 CG14506	-	-	-	-
CG34157	Dys	BP	FBgn0024242	Dys dystrophin muscle development	ENSG00000198947 DMD Dystrophin (I, HOMG_20856)	ENSG00000152818 UTRN Utrophin (I, OMCL_OG2_73989); ENSG00000198947 DMD Dystrophin (OMCL_OG2_73989); ENSG00000102385 DRP2 Dystrophin-related protein 2 (OMCL_OG2_73989)	ENSMUSG00000045103 Dmd Dystrophin (I, HOMG_20856)	ENSMUSG00000045103 Dmd Dystrophin (OMCL_OG2_73989); ENSMUSG00000019820 Utrn utrophin (OMCL_OG2_73989); ENSMUSG00000000223 Drp2 dystrophin related protein 2 (OMCL_OG2_73989)	CG6637	CG6637	PAIN	FBgn0038908	CG6637 CG6637	ENSG00000159210 SNF8 Vacuolar sorting protein SNF8 (OMCL_OG2_73046, COMP, I, HOMG_5239)	-	ENSMUSG00000006058 Snf8 Vacuolar-sorting protein SNF8 (OMCL_OG2_73046, COMP, I, HOMG_5239)	-
CG34157	Dys	BP	FBgn0024242	Dys dystrophin muscle development	ENSG00000198947 DMD Dystrophin (I, HOMG_20856)	ENSG00000152818 UTRN Utrophin (I, OMCL_OG2_73989); ENSG00000198947 DMD Dystrophin (OMCL_OG2_73989); ENSG00000102385 DRP2 Dystrophin-related protein 2 (OMCL_OG2_73989)	ENSMUSG00000045103 Dmd Dystrophin (I, HOMG_20856)	ENSMUSG00000045103 Dmd Dystrophin (OMCL_OG2_73989); ENSMUSG00000019820 Utrn utrophin (OMCL_OG2_73989); ENSMUSG00000000223 Drp2 dystrophin related protein 2 (OMCL_OG2_73989)	CG4799	Pen	PAIN	FBgn0011823	Pen Pendulin protein import into nucleus, docking,sperm individualization,gravitaxis,cell proliferation,NLS-bearing substrate import into nucleus,lymph gland development,cytoplasmic transport,protein import into nucleus,cytoplasmic transport, nurse cell to oocyte,ovarian ring canal formation	ENSG00000182481 KPNA2 Importin subunit alpha-2 (OMCL_OG2_76621, I)	ENSG00000182481 KPNA2 Importin subunit alpha-2 (HOMG_1708, COMP); ENSG00000185467 A4D277_HUMAN Similar to importin alpha 1b (I, COMP); ENSG00000214180 \N \N (COMP); ENSG00000215769 IMA2_HUMAN Importin subunit alpha-2 (COMP); ENSG00000214035 NP_0010390111 similar to Importin alpha-2 subunit , mRNA (COMP); 728860 LOC728860 (HOMG_1708)	ENSMUSG00000018362 Kpna2 Importin subunit alpha-2 (I)	ENSMUSG00000018362 Kpna2 Importin subunit alpha-2 (OMCL_OG2_76621, HOMG_1708, COMP); ENSMUSG00000050278 (OMCL_OG2_76621); ENSMUSG00000069083 \N \N (OMCL_OG2_76621); ENSMUSG00000038770 AW146299 expressed sequence AW146299 , mRNA (COMP); 100043906 LOC100043906 (HOMG_1708); 100039592 LOC100039592 (HOMG_1708); ENSMUSG00000066878 \N \N (OMCL_OG2_76621)
CG3421	RhoGAP93B	PAIN	FBgn0038853	RhoGAP93B RhoGAP93B signal transduction,axon guidance	ENSG00000147799 K1688_HUMAN \N (OMCL_OG2_75030, I)	-	ENSMUSG00000033697 D15Wsu169e Protein KIAA1688 (OMCL_OG2_75030, I)	-	CG2248	Rac1	BP	FBgn0010333	Rac1 Rac1 open tracheal system development,border follicle cell migration,phagocytosis, engulfment,imaginal disc-derived wing hair site selection,dendrite morphogenesis,regulation of axonogenesis,axonogenesis,axon extension,rhabdomere development,hemocyte development,dorsal closure,hemocyte migration,intercellular junction assembly and maintenance,peripheral nervous system development,establishme…	ENSG00000169750 RAC3 Ras-related C3 botulinum toxin substrate 3 precursor (I, HOMG_68433); ENSG00000128340 RAC2 Ras-related C3 botulinum toxin substrate 2 precursor (I)	ENSG00000136238 RAC1 Ras-related C3 botulinum toxin substrate 1 precursor (COMP, I, OMCL_OG2_71737); ENSG00000169750 RAC3 Ras-related C3 botulinum toxin substrate 3 precursor (COMP, OMCL_OG2_71737); ENSG00000172895 \N \N (I, OMCL_OG2_71737); ENSG00000128340 RAC2 Ras-related C3 botulinum toxin substrate 2 precursor (COMP, OMCL_OG2_71737)	ENSMUSG00000018012 Rac3 Ras-related C3 botulinum toxin substrate 3 precursor (I, HOMG_68433); ENSMUSG00000001847 Rac1 Ras-related C3 botulinum toxin substrate 1 precursor (I)	ENSMUSG00000033220 Rac2 Ras-related C3 botulinum toxin substrate 2 precursor (COMP, I, OMCL_OG2_71737); ENSMUSG00000001847 Rac1 Ras-related C3 botulinum toxin substrate 1 precursor (COMP, I, OMCL_OG2_71737); ENSMUSG00000018012 Rac3 Ras-related C3 botulinum toxin substrate 3 precursor (COMP, I, OMCL_OG2_71737)
CG34376	CG34376	BP	FBgn0085405	CG34376	-	-	-	-	CG3619	Dl	PAIN	FBgn0000463	Dl Delta open tracheal system development,cell fate specification,lateral inhibition,compound eye cone cell fate commitment,oocyte anterior/posterior axis determination,apposition of dorsal and ventral imaginal disc-derived wing surfaces,R8 cell differentiation,actin filament organization,imaginal disc-derived leg morphogenesis,mesoderm development,establishment of ommatidial polarity,peripheral …	ENSG00000198719 DLL1 Delta-like protein 1 precursor (I, HOMG_4104)	ENSG00000128917 DLL4 Delta-like protein 4 precursor (I, COMP, OMCL_OG2_74825); ENSG00000198719 DLL1 Delta-like protein 1 precursor (COMP, OMCL_OG2_74825)	ENSMUSG00000014773 Dll1 Delta-like protein 1 precursor (I, HOMG_4104)	ENSMUSG00000027314 Dll4 Delta-like protein 4 precursor (I, COMP, OMCL_OG2_74825); ENSMUSG00000014773 Dll1 Delta-like protein 1 precursor (COMP, OMCL_OG2_74825)
CG34401	CG34401	PAIN	FBgn0085430	CG34401	ENSG00000214655 KIAA0913 \N (COMP); 23053 KIAA0913 (HOMG_34313); ENSG00000162415 ZSWIM5 Zinc finger SWIM domain-containing protein 5 (I)	ENSG00000130449 ZSWIM6 Zinc finger SWIM domain-containing protein 6 (I); ENSG00000132003 ZSWIM4 Zinc finger SWIM domain-containing protein 4 (I)	ENSMUSG00000021819 2310021P13Rik Zinc finger SWIM domain-containing protein KIAA0913 (HOMG_34313, COMP, I, OMCL_OG2_76846)	-	CG31626	CG31626	BP	FBgn0051626	CG31626 CG31626 biological_process	-	-	-	MGI:3644091 (I)
CG34401	CG34401	PAIN	FBgn0085430	CG34401	ENSG00000214655 KIAA0913 \N (COMP); 23053 KIAA0913 (HOMG_34313); ENSG00000162415 ZSWIM5 Zinc finger SWIM domain-containing protein 5 (I)	ENSG00000130449 ZSWIM6 Zinc finger SWIM domain-containing protein 6 (I); ENSG00000132003 ZSWIM4 Zinc finger SWIM domain-containing protein 4 (I)	ENSMUSG00000021819 2310021P13Rik Zinc finger SWIM domain-containing protein KIAA0913 (HOMG_34313, COMP, I, OMCL_OG2_76846)	-	CG17826	CG17826	BP	FBgn0036227	CG17826 CG17826 chitin metabolic process	-	-	-	-
CG34401	CG34401	PAIN	FBgn0085430	CG34401	ENSG00000214655 KIAA0913 \N (COMP); 23053 KIAA0913 (HOMG_34313); ENSG00000162415 ZSWIM5 Zinc finger SWIM domain-containing protein 5 (I)	ENSG00000130449 ZSWIM6 Zinc finger SWIM domain-containing protein 6 (I); ENSG00000132003 ZSWIM4 Zinc finger SWIM domain-containing protein 4 (I)	ENSMUSG00000021819 2310021P13Rik Zinc finger SWIM domain-containing protein KIAA0913 (HOMG_34313, COMP, I, OMCL_OG2_76846)	-	CG10650	CG10650	BP	FBgn0046302	CG10650 CG10650 metabolic process	-	-	-	-
CG34401	CG34401	PAIN	FBgn0085430	CG34401	ENSG00000214655 KIAA0913 \N (COMP); 23053 KIAA0913 (HOMG_34313); ENSG00000162415 ZSWIM5 Zinc finger SWIM domain-containing protein 5 (I)	ENSG00000130449 ZSWIM6 Zinc finger SWIM domain-containing protein 6 (I); ENSG00000132003 ZSWIM4 Zinc finger SWIM domain-containing protein 4 (I)	ENSMUSG00000021819 2310021P13Rik Zinc finger SWIM domain-containing protein KIAA0913 (HOMG_34313, COMP, I, OMCL_OG2_76846)	-	CG17946	Mst84Da	BP	FBgn0004172	Mst84Da Male-specific RNA 84Da	-	-	-	-
CG34401	CG34401	PAIN	FBgn0085430	CG34401	ENSG00000214655 KIAA0913 \N (COMP); 23053 KIAA0913 (HOMG_34313); ENSG00000162415 ZSWIM5 Zinc finger SWIM domain-containing protein 5 (I)	ENSG00000130449 ZSWIM6 Zinc finger SWIM domain-containing protein 6 (I); ENSG00000132003 ZSWIM4 Zinc finger SWIM domain-containing protein 4 (I)	ENSMUSG00000021819 2310021P13Rik Zinc finger SWIM domain-containing protein KIAA0913 (HOMG_34313, COMP, I, OMCL_OG2_76846)	-	CG7570	hale	BP	FBgn0036924	hale hale-bopp biological_process	-	-	-	-
CG34404	CG34404	BP	FBgn0085433	CG34404	ENSG00000171444 MCC Colorectal mutant cancer protein (HOMG_20539, I, OMCL_OG2_83801)	ENSG00000130307 USHBP1 USH1C-binding protein 1 (COMP); ENSG00000171444 MCC Colorectal mutant cancer protein (COMP)	ENSMUSG00000071856 Mcc mutated in colorectal cancers isoform 1 (I, OMCL_OG2_83801)	ENSMUSG00000034911 Ushbp1 USH1C-binding protein 1 (COMP); ENSMUSG00000071856 Mcc mutated in colorectal cancers isoform 1 (COMP)	CG14818	CG14818	PAIN	FBgn0026088	CG14818 CG14818 biological_process	ENSG00000171159 C9orf16 UPF0184 protein C9orf16 (COMP, OMCL_OG2_81379)	-	ENSMUSG00000039195 1110008P14Rik UPF0184 protein C9orf16 homolog (COMP, OMCL_OG2_81379)	-
CG34404	CG34404	BP	FBgn0085433	CG34404	ENSG00000171444 MCC Colorectal mutant cancer protein (HOMG_20539, I, OMCL_OG2_83801)	ENSG00000130307 USHBP1 USH1C-binding protein 1 (COMP); ENSG00000171444 MCC Colorectal mutant cancer protein (COMP)	ENSMUSG00000071856 Mcc mutated in colorectal cancers isoform 1 (I, OMCL_OG2_83801)	ENSMUSG00000034911 Ushbp1 USH1C-binding protein 1 (COMP); ENSMUSG00000071856 Mcc mutated in colorectal cancers isoform 1 (COMP)	CG15071	CG15071	PAIN	FBgn0034377	CG15071 CG15071	-	-	-	-
CG34405	NaCP60E	BP	FBgn0085434	NaCP60E Na channel protein 60E response to chemical stimulus,sodium ion transport,olfactory behavior	-	ENSG00000144285 SCN1A Sodium channel protein type 1 subunit alpha (OMCL_OG2_71074); ENSG00000153253 SCN3A Sodium channel protein type 3 subunit alpha (OMCL_OG2_71074); ENSG00000183873 SCN5A Sodium channel protein type 5 subunit alpha (OMCL_OG2_71074); ENSG00000169432 SCN9A Sodium channel protein type 9 subunit alpha (OMCL_OG2_71074); ENSG00000196876 SCN8A Sodium channel protein type 8 subunit alp…	-	ENSMUSG00000064329 Scn1a sodium channel, voltage-gated, type I, alpha (OMCL_OG2_71074); ENSMUSG00000075318 Scn2a1 sodium channel, voltage-gated, type II, alpha 1 (OMCL_OG2_71074); ENSMUSG00000034115 Scn11a Sodium channel protein type 11 subunit alpha (OMCL_OG2_71074); ENSMUSG00000032511 Scn5a voltage-gated sodium channel type V alpha (OMCL_OG2_71074); ENSMUSG00000034810 Scn7a sodium channel, volt…	CG2158	CG2158	PAIN	FBgn0033264	CG2158 CG2158 phagocytosis, engulfment,intracellular transport	ENSG00000093000 NUP50 Nucleoporin 50 kDa (HOMG_5190, COMP, I)	ENSG00000189235 \N \N (I, OMCL_OG2_76535); ENSG00000093000 NUP50 Nucleoporin 50 kDa (OMCL_OG2_76535)	ENSMUSG00000016619 Nup50 Nucleoporin 50 kDa (HOMG_5190, I, OMCL_OG2_76535)	ENSMUSG00000072878 1700123L14Rik RIKEN cDNA 1700123L14 gene on chromosome 6 (I, COMP); ENSMUSG00000016619 Nup50 Nucleoporin 50 kDa (COMP)
CG34416	Ank2	PAIN	FBgn0085445	Ank2 Ank2 signal transduction,axon extension,cytoskeletal anchoring	ENSG00000145362 ANK2 Ankyrin-2 (I)	ENSG00000151150 ANK3 Ankyrin-3 (OMCL_OG2_70756, I); ENSG00000029534 ANK1 Ankyrin-1 (OMCL_OG2_70756); ENSG00000145362 ANK2 Ankyrin-2 (OMCL_OG2_70756)	ENSMUSG00000069601 Ank3 ankyrin 3, epithelial isoform i (I)	ENSMUSG00000031543 Ank1 Ankyrin-1 (OMCL_OG2_70756, I); ENSMUSG00000032826 Ank2 ankyrin 2, brain isoform 2 (OMCL_OG2_70756); ENSMUSG00000069601 Ank3 ankyrin 3, epithelial isoform i (OMCL_OG2_70756)	CG1956	Dmel_CG3936	BP	FBgn0004636	R Roughened dorsal closure,regulation of cell shape,regulation of embryonic cell shape,hemocyte migration,small GTPase mediated signal transduction,compound eye photoreceptor fate commitment,substrate-bound cell migration, cell extension,ovarian follicle cell stalk formation,regulation of JNK cascade,cell adhesion	ENSG00000176276 NP_0010831731 \N (HOMG_2162); ENSG00000116473 RAP1A Ras-related protein Rap-1A precursor (I)	ENSG00000127314 RAP1B Ras-related protein Rap-1b precursor (OMCL_OG2_73778, I, COMP); ENSG00000176276 NP_0010831731 \N (I, COMP); ENSG00000116473 RAP1A Ras-related protein Rap-1A precursor (OMCL_OG2_73778, COMP); ENSG00000214405 \N \N (COMP)	ENSMUSG00000068798 Rap1a Ras-related protein Rap-1A precursor (I, HOMG_2162)	ENSMUSG00000052681 Rap1b Ras-related protein Rap-1b precursor (OMCL_OG2_73778, I, COMP); ENSMUSG00000068798 Rap1a Ras-related protein Rap-1A precursor (OMCL_OG2_73778, COMP); ENSMUSG00000063495 \N \N (OMCL_OG2_73778); MGI:3643262 EG668838 predicted gene, EG668838 (I)
[truncated: 483 more rows]
