# Supplementary material for: Construction of a Global Pain Systems Network Highlights Phospholipid Signaling as a Regulator of Heat Nociception
Source: PLoS Genet. 2012 Dec 6;8(12):e1003071. doi: 10.1371/journal.pgen.1003071 (PMC3516557; doi:10.1371/journal.pgen.1003071)
Supplement: Table S5 — Mammalian KEGG analysis. Enrichment of KEGG pathways for mouse and human orthologs corresponding to Drosophila candidate pain genes. The complete analysis for 202 mouse (top), and 209 human (bottom) KEGG pathways are shown. For each pathway, the KEGG database ID, pathway name, KEGG gene sets, CG/Entrez IDs for the mapped genes, numbers of genes assigned to each KEGG pathway, numbers of hits and their binding partners that map to the KEGG pathways, percentages of genes mapped among the total KEGG gene sets, and hypergeometric probabilities are listed. KEGG pathway ID numbers are presented and can be used to obtain complete list of genes included (see http://www.genome.jp/kegg/). Pathways that are over 90% enriched were manually annotated into functional groups and combined with C2 gene sets for visual representation in Figure 1 and Table S7. (XLS) [file pgen.1003071.s010.xls]

## Sheet: Sheet1
Table S5. KEGG analysis for Mammalian orthologs of Drosophila candidate pain genes and their binding partners
Mouse KEGG
KEGG Pathway id	Pathway Name	KEGG Gene Set	Genes Mapped	KEGG Gene Set Count	No. of Genes Mapped	%of Genes Mapped	Hypergeometeric Probability	Organism
mmu00982	Drug metabolism - cytochrome P450	100046051,107141,109731,11522,11529,11532,11670,11761,13077,13085,13086,13087,13088,13089,13090,13094,13095,13096,13097,13098,13099,13101,13105,13106,13112,13113,13114,14261,14262,14263,14857,14858,14859,14860,14862,14863,14864,14865,14866,14867,14869,14870,14871,14872,14873,14874,17161,22236,22238,226105,226143,226564,26876,337924,394430,394432,394433,394434,394435,394436,404195,53973,552899,559…	13112,13113,13114,14261,14262,14263,14871,14872,14873,22236,22238,226564,337924,394430,394432,394433,394434,394435,394436,53973,552899,55990,56388,68214,71773,72094,94215,94284	81	28	34.5679	1	Mouse
mmu00983	Drug metabolism - other enzymes	103149,104158,110006,13085,13086,13087,13112,13113,13114,13884,13897,13909,15452,16434,17960,17961,17962,21877,22017,22236,22238,22245,22247,22271,22436,229363,234673,23917,23918,337924,382053,394430,394432,394433,394434,394435,394436,436059,53973,552899,56388,57813,64705,68556,71773,72094,72269,72361,72962,76654,80914,94215,94284,99586	13112,13113,13114,22236,22238,337924,394430,394432,394433,394434,394435,394436,53973,552899,56388,68556,71773,72094,80914,94215,94284	54	21	38.8889	1	Mouse
mmu00040	Pentose and glucuronate interconversions	102448,110006,11677,11997,14187,216558,22235,22236,22238,394430,394432,394433,394434,394435,394436,552899,66646,67880,71773,72094,94215,94284	22236,22238,394430,394432,394433,394434,394435,394436,552899,71773,72094,94215,94284	22	13	59.0909	1	Mouse
mmu00980	Metabolism of xenobiotics by cytochrome P450	107141,11522,11529,11532,11670,13076,13077,13078,13088,13089,13090,13094,13095,13096,13097,13098,13099,13106,13107,13112,13113,13114,13849,14857,14858,14859,14860,14862,14863,14864,14865,14866,14867,14869,14870,14871,14872,14873,14874,22236,22238,226105,226143,26876,337924,394430,394432,394433,394434,394435,394436,404195,53973,552899,56388,56615,56847,66447,67689,68214,68312,69888,71755,71773,720…	13112,13113,13114,14871,14872,14873,22236,22238,337924,394430,394432,394433,394434,394435,394436,53973,552899,56388,68214,71773,72094,94215,94284	71	23	32.3944	1	Mouse
mmu00830	Retinol metabolism	107141,11522,11529,11532,11668,13076,13077,13082,13085,13086,13087,13088,13089,13090,13094,13095,13096,13097,13098,13099,13112,13113,13114,13117,13118,13119,13350,17252,19378,19682,19683,19892,20148,22236,22238,226105,226143,232174,235033,241452,245532,26358,26876,28200,337924,394430,394432,394433,394434,394435,394436,404195,53973,546726,552899,56388,63857,67442,67800,69888,71773,72082,72094,7230…	13112,13113,13114,13117,13118,13119,22236,22238,337924,394430,394432,394433,394434,394435,394436,53973,552899,56388,71773,72094,94215,94284	69	22	31.8841	1	Mouse
mmu04530	Tight junction	100044385,109711,110854,114141,11461,11465,11472,11474,11651,11652,11848,12361,12385,12386,12387,12540,12567,12695,12737,12738,12739,12740,12741,12995,13000,13001,13043,13821,13822,13823,140781,14677,14678,14679,14924,15163,15461,16456,16653,16897,17475,17532,17879,17880,17882,17883,17884,17885,17886,17888,17898,17906,17907,18176,18260,18417,18750,18751,18752,18753,18754,18755,18759,18761,18762,1…	11461,11465,11651,11652,12361,12567,13001,140781,17879,17880,17882,17883,17884,17885,17886,17888,19052,19053,20742,20779,22612,23797,30960,51792,544791,56513,58220,668940,71960,73699,77579,93737	136	32	23.5294	1	Mouse
mmu04110	Cell cycle	100039786,100045924,100046039,100046417,100046823,100047564,100048076,100048437,105988,107995,11350,11920,12235,12236,12237,12427,12428,12442,12443,12444,12445,12447,12448,12530,12531,12532,12534,12544,12545,12566,12567,12571,12572,12575,12576,12577,12578,12579,12580,12581,12649,12914,13197,13555,13557,140557,15182,17120,17126,17127,17128,17215,17216,17217,17218,17219,17220,17222,17246,17873,1839…	105988,12235,12427,12428,12442,12443,12444,12445,12447,12448,12534,12566,12567,12571,12914,13557,18392,18817,209091,21402,218294,229776,268697,328572,434175,56371,66671,68999,71890	124	29	23.3871	1	Mouse
mmu00860	Porphyrin and chlorophyll metabolism	107508,109778,110006,11655,11656,12870,12892,14151,14319,15159,15288,15368,15369,17025,19044,22236,22238,22275,22276,226139,233016,394430,394432,394433,394434,394435,394436,552899,67417,67634,70383,71773,72094,77697,94215,94284	14319,22236,22238,394430,394432,394433,394434,394435,394436,552899,71773,72094,94215,94284	36	14	38.8889	1	Mouse
mmu00500	Starch and sucrose metabolism	103988,110006,110078,110095,11722,11723,14377,14387,14751,14936,15275,15277,18605,19309,209558,212032,216558,22235,22236,22238,232493,394430,394432,394433,394434,394435,394436,552899,67883,69983,71773,72094,72157,74185,77559,94215,94284	22236,22238,394430,394432,394433,394434,394435,394436,552899,71773,72094,94215,94284	37	13	35.1351	1	Mouse
mmu04115	p53 signaling pathway	100043266,100045837,100045925,107831,107986,11783,11920,12028,12122,12367,12370,12371,12442,12443,12444,12445,12447,12448,12450,12452,12521,12534,12566,12567,12571,12575,12578,12649,13063,13067,13197,13663,140742,14102,16000,16009,170770,17246,17248,17873,18787,19211,20135,20437,20438,20724,209091,21825,22059,22062,22084,22401,230784,23882,26374,268697,29870,382985,434175,50883,53892,55948,57913,…	12442,12443,12444,12445,12447,12448,12450,12452,12534,12566,12567,12571,16009,20437,20438,209091,21825,268697,434175	73	19	26.0274	0.999999	Mouse
mmu00150	Androgen and estrogen metabolism	13072,13075,14979,15483,15484,15485,15486,15487,15490,15492,15493,15495,15496,15497,20860,20865,208665,20905,22236,22238,394430,394432,394433,394434,394435,394436,52686,54200,552899,56348,66138,67011,69536,71773,72094,78925,94215,94224,94284	22236,22238,394430,394432,394433,394434,394435,394436,552899,71773,72094,94215,94284	39	13	33.3333	0.999999	Mouse
mmu04310	Wnt signaling pathway	100044385,100045547,100046417,100048076,100048622,103583,106042,108058,11789,11848,12005,12006,12234,12301,12322,12323,12325,12387,12443,12444,12445,12622,12914,12995,13000,13001,13016,13017,13380,13542,13543,13544,14283,14296,14362,14365,14366,14367,14368,14369,14370,14371,16476,16842,16973,16974,170758,17126,17127,17128,17393,17869,18018,18019,18021,18099,18747,18749,18750,18751,18752,18795,187…	106042,108058,12322,12323,12325,12443,12444,12445,12914,13001,13016,13017,14362,14369,170758,19052,19053,19058,19353,19354,20437,20438,21402,216795,22412,243548,328572,51792,57265,73699	153	30	19.6078	0.999999	Mouse
mmu04350	TGF-beta signaling pathway	100044385,100046417,100046802,100047564,100048076,104394,110542,11477,11479,11480,11481,11482,11705,11848,12156,12159,12160,12161,12162,12163,12164,12166,12167,12168,12579,12667,12845,12914,13179,13559,13590,14313,14563,15901,15902,15903,15904,15978,16323,16324,16325,16326,17125,17126,17127,17128,17129,17130,17131,17869,18119,18121,18741,19052,19053,19650,19651,19877,19878,20683,21402,21781,21803…	104394,12845,12914,13559,17125,17129,17130,17131,19052,19053,21402,21825,21826,21827,21828,328572,51792,55994,58988,72508,73699	96	22	22.9167	0.999999	Mouse
mmu04330	Notch signaling pathway	100046039,100048437,103806,11491,12914,13016,13017,13388,13389,13542,13543,13544,14357,14534,15182,15205,15208,16449,16450,16848,17305,18128,18129,18131,18132,18222,18223,18519,19164,19165,19208,19664,19668,19719,20602,207521,209200,226548,328572,330129,433586,433759,54485,59287,634881,66340,66354,66935,675589,74198,80904	12914,13016,13017,13388,14357,18128,18129,18131,18132,207521,209200,328572,54485,74198	51	14	27.451	0.999994	Mouse
mmu05214	Glioma	100044675,100045547,108058,109880,110157,11651,11652,11836,12313,12314,12315,12322,12323,12325,12443,12567,12571,12575,12578,13555,13557,13645,13649,14784,15461,16000,16001,16653,17246,18176,18590,18591,18595,18596,18706,18707,18708,18709,18710,18750,18751,18752,18803,19211,19645,20416,20418,20662,20663,216148,21802,22059,234779,23797,242705,26395,26396,26413,26417,271849,30955,320207,433158,5671…	108058,11651,11652,12313,12314,12315,12322,12323,12325,12443,12567,12571,13557,23797,70405	68	15	22.0588	0.999933	Mouse
mmu00620	Pyruvate metabolism	100705,106557,107029,107476,109264,109801,110446,110460,110695,11669,11671,11677,11997,13382,14187,14651,16828,16832,16833,17436,17448,17449,18534,18563,18597,18598,18746,18770,235339,433229,52815,56752,60525,66204,68263,68738,68977,72535,74156,74551,75572,76238	107029,109264,110446,110460,13382,14651,17436,18597,18598,235339,68977	42	11	26.1905	0.999926	Mouse
mmu00190	Oxidative phosphorylation	100039281,100039636,100040287,100040340,100040778,100041273,100041785,100041835,100041926,100042503,100042918,100043160,100043472,100044492,100044600,100044706,100045109,100045602,100046079,100046199,100046900,100047065,100047429,100047450,100048426,100048480,100048613,108664,110323,110935,114143,11944,11945,11946,11947,11949,11950,11951,11957,11958,11964,11966,11972,11973,11974,11975,11984,12856…	114143,11945,11946,11975,12864,140494,21871,22272,22273,227197,239760,27060,27425,54411,621837,622178,66152,66335,67126,67130,67895,68349,68775,69875,70316,72900,74776,75406	171	28	16.3743	0.999923	Mouse
mmu05040	Huntington's disease	100044207,12028,12064,12313,12314,12315,12362,12367,12368,12370,12411,12757,12914,13191,14433,14784,15114,15194,20185,215114,21817,218397,22059,231999,328572,53323,67300,70405,73916,74325,80796	12313,12314,12315,12757,12914,328572,67300,70405,74325	31	9	29.0323	0.999904	Mouse
mmu05215	Prostate cancer	100044675,109880,110157,11651,11652,11835,11836,11911,12015,12043,12371,12387,12443,12447,12448,12566,12575,12576,12675,12912,12913,12914,13555,13557,13645,13649,13866,14182,14183,14784,14870,15461,15516,15519,16000,16001,16150,16151,16333,16334,16653,16842,17246,18033,18034,18035,18095,18176,18590,18591,18595,18596,18607,18706,18707,18708,18709,18710,19211,19645,19697,20662,20663,208647,208677,2…	11651,11652,12443,12447,12448,12566,12914,13557,14182,14183,15516,15519,18033,18034,19697,22027,23797,328572	92	18	19.5652	0.999903	Mouse
mmu00361	gamma-Hexachlorocyclohexane degradation	11431,11432,11433,11647,11648,11650,13112,13113,13114,18979,269823,330260,337924,53973,56318,56388,66659	13112,13113,13114,337924,53973,56388	17	6	35.2941	0.999802	Mouse
mmu00071	Fatty acid metabolism	110446,110460,110695,11363,11364,11370,113868,11409,11430,11522,11529,11532,11669,11671,12894,12895,12896,13117,13118,13119,13177,14081,15107,15108,15488,216739,231086,235674,23986,26876,270076,433256,50790,52538,56752,66885,72535,74147,74205,78070,80911,93747,97212	110446,110460,13117,13118,13119,15108,231086,50790,52538,74205	43	10	23.2558	0.999569	Mouse
mmu04720	Long-term potentiation	100044431,100045018,100045356,100045547,100048622,108058,108071,109880,109905,110157,110651,11514,11836,11911,12288,12313,12314,12315,12322,12323,12325,12326,12914,14682,14799,14800,14810,14811,14812,14813,14814,14816,15461,16438,16439,16440,16653,17931,18176,18747,18749,18750,18751,18752,18795,18796,18797,18798,19045,19046,19047,19055,19056,19057,19058,19059,19108,20111,20112,215449,223864,26395…	108058,109905,12313,12314,12315,12322,12323,12325,12326,12914,19058,215449,328572,70405	73	14	19.1781	0.999445	Mouse
mmu05212	Pancreatic cancer	100048076,109880,110157,11479,11651,11652,11836,12015,12048,12190,12371,12443,12540,12567,12571,12578,12675,13555,13557,13645,13649,13866,14205,16150,16151,16451,16653,170758,17126,17127,17128,18033,18034,18654,18706,18707,18708,18709,18710,18805,19353,19354,19361,19645,19697,19730,19765,20846,20848,21802,21803,21808,21809,21812,21813,22059,22339,22340,22341,23797,242705,26395,26413,26414,26417,2…	11651,11652,12443,12567,12571,13557,170758,18033,18034,19353,19354,19361,19697,23797	75	14	18.6667	0.99925	Mouse
mmu00252	Alanine and aspartate metabolism	108682,109900,11484,11564,11565,11566,11611,11898,12908,13382,14415,14417,14718,14719,18563,18597,18598,224805,226414,226539,229487,234734,235339,244141,268782,268860,27053,66514,68263,69719,70223,70503,71670,76282	13382,14415,14417,18597,18598,224805,234734,235339	34	8	23.5294	0.998901	Mouse
mmu04520	Adherens junction	100048076,108100,109711,11431,11461,11465,11472,11474,11479,11848,12385,12386,12387,12388,12540,12550,12914,12995,13000,13001,13649,13866,14158,14182,14360,15170,16001,16337,16842,170758,17126,17127,17128,17295,18099,19246,19263,19268,19271,19274,19294,19353,19354,20411,20583,20613,20779,21414,21415,21416,216033,21812,21813,21872,22330,22376,22612,227377,242687,245880,26409,26413,26417,269275,298…	11461,11465,12914,13001,14182,14360,170758,19353,19354,20583,20779,22612,328572	76	13	17.1053	0.997453	Mouse
mmu04916	Melanogenesis	100045547,104110,104111,108058,110157,11512,11513,11514,11515,12313,12314,12315,12322,12323,12325,12387,12912,12913,12914,13190,13542,13543,13544,13614,13618,14362,14365,14366,14367,14368,14369,14370,14371,14677,14678,14679,14681,14682,14683,15461,16590,16653,16842,17199,17311,17342,18176,18747,18749,18750,18751,18752,18795,18796,18797,18798,18976,19108,208647,208677,20890,210044,21414,21415,2141…	108058,12313,12314,12315,12322,12323,12325,12914,14362,14369,216795,22412,328572,57265,70405	100	15	15	0.994344	Mouse
mmu05221	Acute myeloid leukemia	109880,110157,11651,11652,11836,12015,12394,12395,12427,12443,12606,12675,13685,14255,14784,15461,16150,16151,16480,16590,16653,16842,17869,18033,18034,18176,18706,18707,18708,18709,18710,18712,18715,18854,19015,19401,19697,20375,20662,20663,20848,20850,20851,21414,21415,21416,235320,23797,26395,26396,26413,26417,30955,320207,56717,58988,72508,74769	11651,11652,12427,12443,18033,18034,19697,23797,58988,72508	58	10	17.2414	0.994295	Mouse
mmu00062	Fatty acid elongation in mitochondria	15107,15108,15488,19063,231086,26922,52538,54397,93747,97212	15108,231086,52538	10	3	30	0.994145	Mouse
mmu00430	Taurine and hypotaurine metabolism	12012,12583,14415,14417,14598,207182,211488,23887,246277,71522	14415,14417,246277	10	3	30	0.994145	Mouse
mmu04920	Adipocytokine signaling pathway	100705,105787,108079,108099,109648,11450,11604,11651,11652,12491,12675,12702,12894,12895,14081,14377,16150,16151,16367,16369,16370,16452,16846,16847,18033,18034,18035,18036,18037,18534,18761,18976,19013,19017,19079,19082,19247,19697,20181,20182,20183,20525,20528,207565,20848,20869,216739,21926,21937,21938,22030,23797,241113,26414,26419,26420,384783,433256,50790,55984,56717,68465,71609,72674,74205…	11651,11652,12491,18033,18034,19697,20525,20528,23797,50790,74205	67	11	16.4179	0.993606	Mouse
mmu00650	Butanoate metabolism	101502,110446,110460,110695,11409,11669,11671,117147,14415,14417,15107,15108,15356,15360,15488,18597,18598,208715,214579,217666,268860,27384,353371,56043,56752,64059,67041,68263,69772,71911,72535,74147,78894,83702,93747,97212	110446,110460,14415,14417,15108,18597,18598	36	7	19.4444	0.993358	Mouse
mmu00240	Pyrimidine metabolism	100043714,100046796,100048301,103149,103850,107569,110074,12495,12497,12499,13178,16434,171567,17749,18102,18103,18950,18968,18969,18971,18972,18973,18974,19075,19076,20016,20017,20018,20019,20020,20021,20022,20133,20135,215446,21877,218832,21915,22171,22245,22247,22271,230718,231329,23959,245841,26462,320685,382985,50493,50773,51797,54369,55936,56248,56520,56749,57813,59001,64424,64705,66136,664…	110074,18971,20018,21915,22171,26462,50493,51797,55936,66401,66588,68556,70408,80914	96	14	14.5833	0.990952	Mouse
mmu04080	Neuroactive ligand-receptor interaction	100044431,100044873,100045018,100045356,100047443,100047803,104443,108068,108069,108071,108073,110304,110637,110886,111174,114229,11517,11539,11540,11541,11542,11548,11549,11550,11551,11552,11553,11554,11555,11556,11607,11608,11609,12000,12061,12062,12209,12257,12267,12273,12311,12425,12426,12640,12669,12671,12672,12801,12802,12921,12922,13035,13488,13489,13490,13491,13492,13609,13610,13611,13617…	104443,11539,11540,11541,11542,12425,12426,12801,12802,13609,13610,13611,14427,14428,14429,14739,14745,18386,18387,18389,18390,193034,20605,20606,20607,20608,20609,226304,53978,65086,94226	264	31	11.7424	0.988571	Mouse
mmu05220	Chronic myeloid leukemia	100046039,100048076,100048437,109880,110157,110279,11350,11479,11651,11652,11836,12015,12048,12394,12402,12443,12567,12571,12575,12576,12578,12675,12928,12929,13016,13017,13555,13557,14013,14389,14784,15182,15461,16150,16151,16653,17127,17128,17246,17869,18033,18034,18035,18176,18706,18707,18708,18709,18710,19247,19645,19697,20416,20418,20662,20663,20850,20851,208650,216148,21803,21808,21809,2181…	11651,11652,12443,12567,12571,13016,13017,13557,18033,18034,19697,23797	82	12	14.6341	0.987018	Mouse
mmu05222	Small cell lung cancer	100043266,100045837,100045925,100047564,11651,11652,11783,11796,11797,11798,12043,12048,12371,12443,12447,12448,12566,12567,12571,12576,12579,12675,12826,12827,12829,13063,13067,13555,13557,14083,14198,14268,16150,16151,16398,16399,16400,16403,16410,16412,16772,16773,16774,16775,16776,16777,16779,16780,16782,17187,17344,17869,18033,18034,18035,18125,18126,18127,18706,18707,18708,18709,18710,19211…	11651,11652,12443,12447,12448,12566,12567,12571,13557,18033,18034,19697,23797	94	13	13.8298	0.982856	Mouse
mmu03440	Homologous recombination	114714,12144,12190,17535,18971,18972,19360,19361,19363,19364,19365,19366,19891,20422,21975,21976,268465,27354,381760,57434,623474,67967,68240,68275,69745,71711,74335	18971,19361,19366,623474,68275	27	5	18.5185	0.981944	Mouse
mmu04662	B cell receptor signaling pathway	100048622,108723,111507,11651,11652,12042,12229,12478,12483,12517,12518,12520,12675,12902,14130,14281,15170,15461,15985,16150,16151,16331,16476,16653,17060,170758,17096,18018,18019,18021,18033,18034,18035,18036,18037,18176,18706,18707,18708,18709,18710,18733,18751,19055,19056,19057,19058,19059,19353,19354,20963,22324,22325,234779,23797,240168,240354,30955,320207,380794,54446,56398,56637,57257,638…	11651,11652,12902,170758,18033,18034,19058,19353,19354,23797	69	10	14.4928	0.979389	Mouse
mmu00680	Methane metabolism	108037,11532,11758,12359,17769,20425,320769,76113	11758,320769	8	2	25	0.978694	Mouse
mmu00290	Valine, leucine and isoleucine biosynthesis	102436,105148,12035,12036,18597,18598,22321,381314,68263	18597,18598	9	2	22.2222	0.969915	Mouse
mmu03430	Mismatch repair	100046823,106344,16881,17350,17685,17686,17688,18538,18861,18971,18972,19687,19718,19891,217716,26909,381760,67967,68240,68275,69263,69745,72151	18861,18971,19687,68275	23	4	17.3913	0.967056	Mouse
mmu04510	Focal adhesion	100044675,104099,107589,107746,109700,109711,109880,109905,110157,11461,11465,11472,11474,11651,11652,11796,11797,11798,11848,11855,12015,12043,12334,12387,12389,12390,12391,12443,12444,12445,12540,12643,12814,12815,12824,12825,12826,12827,12829,12831,12832,12833,12834,12842,12843,12845,12927,12928,12929,13367,13645,13649,13712,13866,14083,14205,14254,14257,14268,14360,14784,15234,15461,15891,160…	109905,11461,11465,11651,11652,12334,12443,12444,12445,12845,14360,170758,19353,19354,20779,215449,21825,21826,21827,21828,23797	194	22	11.3402	0.963098	Mouse
mmu00072	Synthesis and degradation of ketone bodies	110446,110460,15356,15360,208715,353371,64059,67041,69772,71911	110446,110460	10	2	20	0.959531	Mouse
mmu00960	Alkaloid biosynthesis II	104158,114874,116939,11754,11758,13897,13909,225010,237940,320769,382053,56292,56441,67758,67877,72590,85031	11758,320769,85031	17	3	17.6471	0.957643	Mouse
mmu00591	Linoleic acid metabolism	101502,107141,11689,13077,13095,13096,13097,13098,13099,13106,13109,13110,13112,13113,13114,18778,18780,18781,18782,18783,18784,226105,226143,26565,26970,26971,27384,329502,337924,404195,53357,53973,56043,56388,66350,69836,69888,72082,72303,74519,83702	13112,13113,13114,337924,53973,56388	41	6	14.6341	0.957261	Mouse
mmu00281	Geraniol degradation	15107,15108,15488,229211,66948	15108	5	1	20	0.945182	Mouse
mmu00590	Arachidonic acid metabolism	106648,107141,109857,11684,11685,11686,11687,11688,11689,12408,12409,13088,13089,13090,13094,13095,13096,13097,13098,13099,13106,13109,13110,13117,13118,13119,13850,14598,14775,14776,14778,14780,16993,17001,170716,18778,18780,18781,18782,18783,18784,19215,19223,19224,19225,207182,21391,226105,226143,23887,26565,26970,26971,329502,404195,53357,54486,64292,64385,66350,67305,69836,69888,70101,71522,…	106648,13117,13118,13119,170716,21391,64385,70101,72054	71	9	12.6761	0.943925	Mouse
mmu05211	Renal cell carcinoma	100046417,107746,109880,109905,110157,112406,112407,11651,11652,11836,11863,11864,12540,12914,12928,12929,13819,14194,14205,14388,14784,15234,15251,15461,16476,16653,17295,18176,18479,18481,18590,18591,18654,18706,18707,18708,18709,18710,19247,19353,20525,20662,20663,214230,215449,216805,21802,21803,21808,21809,22339,22340,22341,22346,224105,23797,23871,241656,26395,26396,26413,26417,30955,320207…	109905,11651,11652,12914,19353,20525,215449,23797,328572	71	9	12.6761	0.943925	Mouse
mmu00280	Valine, leucine and isoleucine degradation	100048676,104776,110446,110460,110695,110821,11364,113868,11409,11669,11671,11761,11992,12035,12036,12039,12040,13171,13382,15107,15108,15356,15360,15488,17850,208715,227095,231086,235674,353371,52538,56357,56752,58875,64059,66904,67041,72039,72535,73724,74147,78038,93747,97212	110446,110460,13382,15108,231086,52538	44	6	13.6364	0.940653	Mouse
mmu05012	Parkinson's disease	100039281,100040287,100040340,100040390,100040778,100040961,100041273,100041785,100041835,100041926,100042355,100042503,100042918,100043160,100043266,100043472,100044492,100044600,100044706,100045109,100045251,100045602,100045837,100045890,100045925,100046079,100046199,100046394,100046900,100047065,100047214,100047342,100047429,100047450,100048426,100048480,100048613,110323,110877,11739,11740,117…	100040961,11946,12864,21823,22195,22272,22273,22333,22334,22335,227197,621837,622178,66152,67126,67130,68349,70316,72900,75406	186	20	10.7527	0.931104	Mouse
mmu00310	Lysine degradation	110446,110460,110695,11669,11671,15107,15108,15488,170442,18293,18822,19193,192289,231326,239017,23923,26432,26433,270076,30956,56752,66624,69019,72535,74147,78920,93747,97212	110446,110460,15108,192289	28	4	14.2857	0.930647	Mouse
mmu04370	VEGF signaling pathway	100048622,102626,110157,11651,11652,12015,12371,12540,14083,15461,15507,16542,16653,170758,17164,18018,18019,18021,18127,18176,18706,18707,18708,18709,18710,18750,18751,18752,18778,18780,18781,18782,18783,18784,18803,19055,19056,19057,19058,19059,19094,19225,19303,19353,19354,20698,20779,216148,22339,234779,23797,26395,26396,26413,26415,26416,26417,26565,26970,26971,27371,29857,30955,320207,32950…	11651,11652,15507,170758,19058,19353,19354,20779,23797	74	9	12.1622	0.929392	Mouse
mmu05223	Non-small cell lung cancer	109880,110157,11651,11652,11836,12015,12371,12443,12567,12571,12578,13555,13557,13645,13649,13866,14198,14784,15461,16653,18176,18607,18706,18707,18708,18709,18710,18750,18751,18752,18803,19645,20181,20182,20183,20662,20663,21802,218772,22059,234779,23797,242705,26395,26396,26413,26417,30955,320207,54354,56289,56484,58231,640611,74769	11651,11652,12443,12567,12571,13557,23797	55	7	12.7273	0.929183	Mouse
mmu00520	Nucleotide sugars metabolism	14430,216558,22235,67883,74246,76355	74246	6	1	16.6667	0.92207	Mouse
mmu00930	Caprolactam degradation	15107,15108,15488,74147,93747,97212	15108	6	1	16.6667	0.92207	Mouse
mmu05060	Prion disease	11803,12043,14580,14828,15510,16193,16772,16777,16785,18024,19122,21926,226519	15510,18024	13	2	15.3846	0.919336	Mouse
mmu04012	ErbB signaling pathway	100045547,108058,109880,110157,11350,11352,11651,11652,11836,11839,12015,12223,12322,12323,12325,12402,12575,12576,12928,12929,13645,13649,13685,13712,13866,13867,13869,13874,14083,14388,14784,15200,15461,16476,16653,17869,17973,17974,18176,18183,18479,18481,18706,18707,18708,18709,18710,18750,18751,18752,18803,20416,20418,20662,20663,20779,20850,20851,208650,211323,214230,216148,21802,224105,234…	108058,11651,11652,12322,12323,12325,20779,23797,58988,72508	88	10	11.3636	0.906767	Mouse
mmu00251	Glutamate metabolism	107508,108682,14415,14417,14583,14584,14629,14630,14645,14660,14661,14718,14719,14782,14854,212647,214579,216456,227231,229363,229487,231327,242669,268860,54342,630729,67417,69719,76282,78914,97541	14415,14417,14782,212647	31	4	12.9032	0.90127	Mouse
mmu00230	Purine metabolism	100043714,100046796,100048301,103850,104110,104111,105446,107569,108147,109674,110639,11486,11512,11513,11514,11515,11534,11564,11565,11566,11636,11637,11639,11717,11821,12495,12496,12497,12499,13178,14198,14450,14544,14917,14919,14923,15452,16434,171567,17749,18102,18103,18160,18573,18574,18575,18576,18577,18578,18582,18583,18584,18585,18588,18605,18746,18770,18950,18968,18969,18971,18972,18973,…	11636,18160,18573,18574,18575,18577,18578,18584,18971,20018,218461,230103,238871,66401,70408,74167	154	16	10.3896	0.889179	Mouse
mmu04150	mTOR signaling pathway	105787,108079,109880,110651,11651,11652,12283,13684,13685,14205,15251,16000,16333,16334,18607,18654,18706,18707,18708,18709,18710,19744,20104,20111,20112,20869,218268,22084,22241,22339,22340,22341,23797,26413,26417,26987,29869,30955,320207,56716,56717,58988,64930,67071,71742,72149,72508,74370,74747,74769,75705,78757	11651,11652,12283,23797,58988,72508	52	6	11.5385	0.879368	Mouse
mmu05210	Colorectal cancer	100043266,100045837,100045925,100048076,109880,110157,11479,11651,11652,11789,11799,11836,11848,12005,12006,12015,12028,12043,12367,12371,12387,12443,13063,13067,13176,13542,13543,13544,13649,14281,14362,14365,14366,14367,14368,14369,14370,14371,14784,16001,16476,16653,16842,170758,17126,17127,17128,17295,17350,17685,17686,17688,17869,18595,18596,18706,18707,18708,18709,18710,19353,19354,19730,20…	11651,11652,12443,14362,14369,170758,19353,19354,23797,57265	93	10	10.7527	0.875108	Mouse
mmu04020	Calcium signaling pathway	100039790,100042410,100042419,100042479,100043202,100043204,100044873,100045018,100045251,100045356,100045547,100047803,100048622,102093,104110,104111,107589,108058,108071,110094,110891,110893,111507,11441,114875,11513,11514,11515,11540,11541,11548,11549,11550,11554,11555,11556,11607,11608,11739,11740,11937,11938,11941,12061,12062,12182,12286,12287,12288,12289,12290,12291,12292,12313,12314,12315,…	108058,11540,11541,12313,12314,12315,12322,12323,12325,12326,12425,12426,18573,18574,18575,19058,22333,22334,22335,70405	201	20	9.95025	0.872718	Mouse
mmu03420	Nucleotide excision repair	100046417,100046823,106344,107986,12572,13194,13870,13871,13872,14884,14885,16881,17420,18538,18971,18972,18973,18974,19359,19687,19718,19891,209357,22590,22591,22592,23894,26370,319955,50505,56438,59001,66467,66671,66979,67967,68240,68275,69263,69745,71991,72151,72584	18971,19359,19687,66671,68275	43	5	11.6279	0.87251	Mouse
mmu05219	Bladder cancer	109880,110157,11836,12443,12550,12567,12575,12578,13143,13144,13555,13557,13645,13649,13866,14184,14205,15461,16653,17246,17390,17395,17869,18176,18654,19645,21825,22059,22339,22340,22341,242705,26395,26396,26413,26417,56289,640611,69635,72962,73086,83995,83996	12443,12567,13557,14184,21825	43	5	11.6279	0.87251	Mouse
mmu05218	Melanoma	100044675,109880,110157,11651,11652,11836,12015,12443,12550,12567,12571,12575,12578,13555,13557,13645,13649,14164,14165,14166,14167,14168,14169,14170,14171,14172,14173,14174,14175,14176,14177,14178,14179,14180,14182,15234,15461,16000,16001,16653,17246,17295,17342,18176,18590,18591,18595,18596,18706,18707,18708,18709,18710,19211,19645,22059,23797,242705,26395,26396,26413,26417,30955,320207,54635,5…	11651,11652,12443,12567,12571,13557,14182,23797	73	8	10.9589	0.870751	Mouse
mmu00632	Benzoate degradation via CoA ligation	110446,110460,116939,225010,226418,270076,329910,56292,56360,56441,66204,67877,74147,75572,93747,97212	110446,110460	16	2	12.5	0.867559	Mouse
mmu01061	Biosynthesis of phenylpropanoids	103988,11674,11676,11758,12183,13361,13806,13807,13808,14120,14121,14287,14433,14718,14719,14751,15275,15277,18641,18642,18648,18655,18663,18746,18770,212032,21351,230163,234724,320769,433182,56012,56421,76113	11758,18648,320769,56012	34	4	11.7647	0.866635	Mouse
mmu04950	Maturity onset diabetes of the young	11925,15205,15242,15285,15376,15377,15378,15379,15874,16333,16334,17341,18012,18088,18096,18506,18508,18609,18770,20526,21405,21410,26424,30942,378435	15379,20526,378435	25	3	12	0.863437	Mouse
mmu03320	PPAR signaling pathway	103968,104086,108078,11363,11364,113868,11430,11450,11770,11806,11807,11814,11832,12140,12491,12894,12895,12896,13117,13118,13119,13122,13124,13167,14077,14079,14080,14081,14626,14933,15360,16202,16204,16592,16956,17436,18534,18607,18830,19013,19015,19016,20181,20182,20183,20249,20250,20280,20411,216739,22190,22227,22259,225579,235674,26457,26458,26459,26569,30049,433256,50790,56473,57875,622384,…	12491,13117,13118,13119,16956,17436,50790,74205	75	8	10.6667	0.854254	Mouse
mmu00010	Glycolysis / Gluconeogenesis	103988,106557,110695,11522,11529,11532,11669,11670,11671,11674,11676,12183,13382,13806,13807,13808,14120,14121,14377,14433,14751,15275,15277,16828,16832,16833,18597,18598,18641,18642,18648,18655,18663,18746,18770,212032,21991,230163,235339,26876,319625,433182,433229,56012,56421,56752,56847,60525,66204,67689,68263,68738,72157,72535,75572	13382,18597,18598,18648,235339,56012	55	6	10.9091	0.850271	Mouse
mmu05217	Basal cell carcinoma	11789,12005,12006,12156,12159,12387,13542,13543,13544,14362,14365,14366,14367,14368,14369,14370,14371,14632,14633,14634,15245,16842,19206,19207,20423,20890,21414,21415,21416,216795,22059,22408,22409,22410,22411,22412,22413,22414,22415,22416,22417,22418,22419,22420,22421,22422,22423,23805,24069,269209,319757,56637,57265,93735,93897	14362,14369,216795,22412,269209,57265	55	6	10.9091	0.850271	Mouse
mmu03030	DNA replication	100046823,106344,14156,16881,17215,17216,17217,17218,17219,17220,18538,18968,18969,18971,18972,18973,18974,19075,19076,19687,19718,19819,19891,327762,381760,59001,66979,67153,67967,68209,68240,68275,69263,69724,69745,72151	18971,19687,67153,68275	36	4	11.1111	0.840924	Mouse
mmu04130	SNARE interactions in vesicular transport	100226,12068,13852,20333,20614,20619,20907,20908,20909,20955,22317,22318,22319,22320,228960,236954,53330,53331,53334,53611,53612,53620,54399,55943,56216,56389,56418,56494,58244,639554,67474,67727,67826,68159,71116,74732	100226,228960,53331,55943	36	4	11.1111	0.840924	Mouse
mmu00400	Phenylalanine, tyrosine and tryptophan biosynthesis	107271,14718,14719,18478,234724,23874,66590,69955,70120	18478	9	1	11.1111	0.840398	Mouse
mmu03010	Ribosome	100039110,100043752,110954,114641,11837,14109,16785,16898,19896,19899,19921,19933,19934,19941,19942,19943,19944,19946,19951,19981,19982,19983,19988,19989,20005,20042,20044,20054,20055,20068,20084,20085,20088,20090,20091,20102,20103,20104,20115,20116,22121,22186,225215,237433,243642,26451,267019,268449,269261,26961,270106,27050,27176,27207,27367,27370,319195,432502,434426,436081,54127,54217,544872…	110954,19983,20116,27050,27367,27370,56040,66211,67025,68537	109	11	10.0917	0.836105	Mouse
mmu04070	Phosphatidylinositol signaling system	104015,104418,107650,108083,110197,110524,114663,114875,117150,12313,12314,12315,13139,16329,16330,16331,16332,16438,16439,16440,170835,18704,18705,18706,18707,18708,18709,18710,18711,18717,18718,18719,18720,18750,18751,18752,18795,18796,18797,18798,18799,18802,18803,19062,19211,20975,212111,217480,217837,224020,225326,228550,234515,234779,269180,30955,320207,320404,320634,52858,55980,64436,70405…	114663,12313,12314,12315,212111,55980,70405	69	7	10.1449	0.812447	Mouse
mmu05322	Systemic lupus erythematosus	100039277,100039319,100039790,100041230,100041756,100042410,100042419,100042421,100042479,100042840,100042922,100042927,100042929,100042931,100042939,100042943,100042944,100042946,100043202,100043204,100044525,100045356,100045423,100045490,100045825,100046213,100046339,100046770,100048845,109711,109828,110382,111507,11472,11474,12259,12260,12262,12263,12266,12268,12274,12279,12487,12519,12524,130…	15077,15078,15081,238836,260423,319148,319150,319152,319153,319154,319165,360198,51788,666634,77605,97908	181	17	9.39227	0.797168	Mouse
mmu04210	Apoptosis	100043266,100044205,100045837,100045925,100048622,108960,11651,11652,11783,11796,11797,11798,11920,12015,12028,12043,12048,12122,12333,12334,12364,12367,12368,12369,12370,12371,12633,12675,12983,12984,13063,13067,13347,13368,13804,14082,14102,14103,16150,16151,16175,16176,16177,16179,16180,16187,16188,17874,18033,18034,18035,18049,18211,18706,18707,18708,18709,18710,18747,18749,19055,19056,19057,…	11651,11652,12333,12334,18033,18034,19058,19697,23797	93	9	9.67742	0.787869	Mouse
mmu04730	Long-term depression	100044385,100044431,100045018,108071,109880,110157,11836,12286,12918,12921,14672,14673,14674,14677,14678,14679,14681,14682,14683,14687,14799,14800,14804,14816,14917,14919,15461,16000,16001,16438,16439,16440,16653,17096,18125,18126,18127,18160,18176,18750,18751,18752,18778,18780,18781,18782,18783,18784,18795,18796,18797,18798,19051,19052,19053,19091,19092,20190,230103,234889,239134,245650,26395,26…	18160,19052,19053,19091,19092,230103,51792,73699	83	8	9.63855	0.778795	Mouse
mmu00360	Phenylalanine metabolism	109731,11670,116939,11754,11758,13195,14718,14719,15445,17161,17319,225010,234724,237940,320769,56292,56441,56847,67689,67877,76113	11758,320769	21	2	9.52381	0.764009	Mouse
mmu04912	GnRH signaling pathway	100045547,104110,104111,108058,110157,11512,11513,11514,11515,11911,12288,12289,12292,12313,12314,12315,12322,12323,12325,12540,12640,13649,13712,14308,14672,14682,14683,14714,14715,14784,15200,15461,16438,16439,16440,16476,16653,16866,17387,17390,18176,18747,18749,18750,18751,18753,18778,18780,18781,18782,18783,18784,18795,18796,18797,18798,18805,18806,19094,19108,19229,20662,20663,20779,210044,…	108058,12313,12314,12315,12322,12323,12325,20779,70405	96	9	9.375	0.75871	Mouse
mmu04360	Axon guidance	100048622,107448,107449,108151,11350,117600,11848,11854,12540,12568,12631,12632,12767,12934,13176,13636,13637,13639,13640,13641,13642,13643,13835,13836,13837,13838,13839,13840,13841,13842,13844,13845,13846,13848,140570,14083,14159,14270,14360,14677,14678,14679,15461,16412,16653,16728,16885,16886,170758,17295,17973,17974,18018,18019,18021,18176,18186,18208,18209,18479,18481,18844,18845,18846,19055…	12568,140570,14360,170758,18844,18845,18846,19058,19353,19354,235611,243743	130	12	9.23077	0.755548	Mouse
mmu00561	Glycerolipid metabolism	102247,104418,110197,110524,110695,11605,11669,11671,11677,116939,11997,12091,12613,13139,13350,14187,14626,14732,14933,15450,16891,16956,18947,19012,217480,225010,225913,226413,235582,245532,28169,50784,55979,56752,669888,67512,67717,67800,67916,68262,69923,72535	11605,15450,16891,16956	42	4	9.52381	0.753837	Mouse
mmu03060	Protein export	100101806,20813,217337,24067,27058,56529,66286,66384,665155,66661,67398,69089	67398	12	1	8.33333	0.749379	Mouse
mmu00480	Glutathione metabolism	110208,14380,14381,14598,14629,14630,14775,14776,14778,14780,14782,14854,14857,14858,14859,14860,14862,14863,14864,14865,14866,14867,14869,14870,14871,14872,14873,14874,15926,16790,18263,20133,20135,20603,207182,20810,23887,269951,382985,56615,625249,630729,66073,66447,66988,67305,68214,68252,68312,71522,75475,75512,76263	14782,14871,14872,14873,68214	53	5	9.43396	0.748857	Mouse
mmu04340	Hedgehog signaling pathway	103236,103583,104318,12156,12159,12160,12161,12162,12163,12164,12234,13363,14451,14632,14633,14634,14725,15245,16147,18747,18749,19108,19206,19207,19335,20423,20890,214897,216795,22408,22409,22410,22411,22412,22413,22414,22415,22416,22417,22418,22419,22420,22421,22422,22423,22772,24069,269209,27373,319757,56637,93687,93735	103236,214897,216795,22412,269209	53	5	9.43396	0.748857	Mouse
mmu00410	beta-Alanine metabolism	103149,110695,11364,11669,11671,11754,14415,14417,20603,20810,227095,237940,268860,338403,56690,56752,64705,72535,74147,93747,97212,99586	14415,14417	22	2	9.09091	0.741761	Mouse
mmu00380	Tryptophan metabolism	107766,109731,110446,110460,110695,11298,11669,11671,11761,12359,13076,13077,13078,13195,15107,15108,15488,15930,17161,18293,209176,216343,21990,22375,239017,23923,270076,52686,56720,56752,66138,67011,69536,70266,70560,70789,71562,72535,74147,76507,93747,97212,98256	110446,110460,15108,71562	43	4	9.30233	0.738222	Mouse
mmu00603	Glycosphingolipid biosynthesis - globoseries	11605,14343,14344,14348,15211,15212,20442,20444,20449,227671,239559,26879,93961	11605	13	1	7.69231	0.718477	Mouse
mmu04010	MAPK signaling pathway	100044675,100048622,102626,109689,109880,109905,110157,110651,114713,11479,11651,11652,11909,11911,12064,12286,12287,12288,12289,12290,12291,12292,12293,12294,12295,12296,12297,12298,12299,12300,12367,12475,12531,12540,12675,12928,12929,13163,13197,13198,13537,13645,13649,13712,13714,14013,140723,14102,14103,14164,14165,14166,14167,14168,14169,14170,14171,14172,14173,14174,14175,14176,14177,14178…	109689,109905,114713,11651,11652,12294,14182,14183,14184,14186,15507,170758,18033,18034,19058,19353,19354,215449,216869,216965,23797,30957,330177	263	23	8.74525	0.71458	Mouse
mmu04664	Fc epsilon RI signaling pathway	110157,111507,11651,11652,12229,12981,14125,14126,14127,14360,14389,14784,15461,16163,16187,16189,16191,16331,16653,16797,16822,170758,17096,18176,18706,18707,18708,18709,18710,18750,18751,18753,18754,18778,18780,18781,18782,18783,18784,18803,19094,19353,19354,20662,20663,20963,21926,22324,22325,228026,234779,23797,26395,26396,26397,26398,26399,26400,26413,26414,26415,26416,26417,26419,26420,2656…	11651,11652,14360,170758,19353,19354,23797	79	7	8.86076	0.698887	Mouse
mmu00052	Galactose metabolism	103988,11605,11677,11997,12091,14187,14377,14387,14430,14595,14635,15275,15277,16770,18641,18642,212032,216558,226413,53418,56421,69976,72157,74246	11605,74246	24	2	8.33333	0.696573	Mouse
mmu00710	Carbon fixation	108682,109264,11674,11676,14120,14121,14718,14719,17436,17448,17449,18655,18663,18746,18770,19895,21881,21991,230163,66646,74419,74637,76282,83553	109264,17436	24	2	8.33333	0.696573	Mouse
mmu04140	Regulation of autophagy	105787,108079,11793,15962,15964,15965,15967,15968,15969,15970,15972,15974,15978,16333,16334,22241,225326,230396,235040,242517,242519,242557,29869,404549,56208,56486,57436,66615,666468,67526,67841,71742,74244,75669,93739	56486,57436,93739	35	3	8.57143	0.690673	Mouse
mmu04512	ECM-receptor interaction	104099,109700,114249,11603,12491,12505,12643,12814,12815,12824,12825,12826,12827,12829,12831,12832,12833,12834,12842,12843,12845,13138,14268,14723,14724,14729,15366,15529,15891,16398,16399,16400,16401,16402,16403,16404,16410,16412,16416,16419,16420,16421,16423,16772,16773,16774,16775,16776,16777,16779,16780,16782,192897,19699,20750,20969,20970,20971,213119,21825,21826,21827,21828,21923,21960,2237…	12491,12845,21825,21826,21827,21828	81	7	8.64198	0.674378	Mouse
mmu04742	Taste transduction	104110,110326,112408,11418,11512,11514,12286,12287,14683,14688,14695,14704,16440,16500,18573,18747,18749,18796,19108,20276,20277,20278,242851,268934,353148,353165,353166,353167,353325,387339,387340,387341,387342,387343,387344,387345,387346,387347,387348,387349,387351,387352,387353,387354,387355,387356,387511,387512,387513,387514,387515,387616,56843,57252,57253,57254,574417,64337,83770,83771	11418,18573,20276,20278,83770	60	5	8.33333	0.648143	Mouse
mmu00630	Glyoxylate and dicarboxylate metabolism	108156,11428,11429,12974,15112,17448,17449,17768,235582,270685,56185,67078,68180,71562,71832,76238	71562	16	1	6.25	0.627137	Mouse
mmu00670	One carbon pool by folate	107747,107885,108037,108147,108156,13361,14317,14450,17768,17769,20425,22171,238505,270685,434437,69606	22171	16	1	6.25	0.627137	Mouse
mmu01510	Neurodegenerative Diseases	11803,11816,11820,12015,12028,12043,12048,12362,12367,12368,12369,12370,12914,13498,14433,14580,14784,14828,15194,17762,18053,18227,19122,19164,19165,20617,20655,22223,269254,319924,328572,380684,50754,50873,56491,57320,66725,68943,74018	12914,328572,56491	39	3	7.69231	0.615348	Mouse
mmu05213	Endometrial cancer	109880,110157,11651,11652,11789,11836,12005,12006,12015,12371,12385,12386,12387,12443,12550,13645,13649,13712,13866,14784,15461,16202,16653,16842,17350,17869,18176,18607,18706,18707,18708,18709,18710,19211,20662,20663,21414,21415,21416,216033,22059,23797,23805,26395,26396,26413,26417,30955,320207,56484,56637,74769	11651,11652,12443,23797	52	4	7.69231	0.591695	Mouse
mmu00120	Bile acid biosynthesis	101502,104086,110695,113868,11522,11529,11532,11669,11671,12012,12613,13122,16889,20652,208665,223920,229211,231086,235674,26459,26876,27384,52538,56043,56752,66948,72535,78925,83702,94224	231086,52538	30	2	6.66667	0.561561	Mouse
mmu00790	Folate biosynthesis	110391,11647,11648,11650,13206,13361,14287,14528,14590,19286,20751,320632,52513,53893,66387,66942,67755,69663,71586,71990,72198,72935,74351,75686,77987,78394,83456,93685,93762,94213	66942,93762	30	2	6.66667	0.561561	Mouse
mmu03020	RNA polymerase	100043714,100046796,100048301,17749,20016,20017,20018,20019,20020,20021,20022,218832,231329,245841,64424,66136,66420,66491,67005,67065,67486,67710,69241,69833,69870,69920,70408,70428,74414,78929	20018,70408	30	2	6.66667	0.561561	Mouse
mmu00640	Propanoate metabolism	100705,104776,106557,107476,110446,110460,110695,110821,11364,11669,11671,16828,16832,16833,17850,20916,20917,227095,268860,433229,56451,56690,56752,60525,66904,68738,72535,73724,74147,93747,97212	110446,110460	31	2	6.45161	0.539855	Mouse
mmu03050	Proteasome	17463,19166,19167,19170,19172,19173,19175,19177,19179,19181,19182,19184,19185,21762,22123,23996,23997,26440,26441,26442,26443,26444,26445,26446,57296,59029,66413,66997,67089,69077,70247	19173,66997	31	2	6.45161	0.539855	Mouse
mmu00510	N-Glycan biosynthesis	102580,103534,103963,107895,13135,13200,13478,13480,13481,140481,14376,14595,17155,17156,17158,17308,17309,20014,20440,207958,208211,208624,217664,223774,227619,230815,268510,269181,320302,320438,328370,380959,381903,53418,53618,56737,57170,57370,57377,66248,66789,67422,67574,68292,68563	13200,13478	45	3	6.66667	0.505031	Mouse
mmu04930	Type II diabetes mellitus	11450,12286,12287,12288,12289,12290,12291,12702,12703,16150,16333,16334,16337,16367,16369,16370,16514,18609,18706,18707,18708,18709,18710,18746,18753,18754,18762,18770,20526,20528,20927,216233,21926,26413,26414,26417,26419,26420,30955,320207,378435,384783,56717,67296,74769	20526,20528,378435	45	3	6.66667	0.505031	Mouse
mmu04660	T cell receptor signaling pathway	100039790,100042410,100042419,100042479,100043202,100043204,100048622,100048845,108723,11651,11652,11848,12042,12402,12477,12487,12500,12501,12502,12503,12504,12525,12526,12540,12567,12675,12981,14281,14360,14784,15170,15461,15978,16150,16151,16153,16183,16189,16191,16428,16476,16653,16797,16818,16822,17444,17973,17974,18018,18019,18021,18033,18034,18035,18036,18037,18176,18479,18481,18566,18706,…	11651,11652,12567,14360,18033,18034,19058,23797	108	8	7.40741	0.492704	Mouse
mmu00532	Chondroitin sulfate biosynthesis	117592,212898,217119,218271,233781,234356,269941,280645,338362,53374,58250,59031,60322,71797,72136,72727,74241,76898,77590,78752,78923	74241	21	1	4.7619	0.487194	Mouse
mmu04540	Gap junction	100044675,100045018,104110,104111,104318,108071,110157,11512,11513,11514,11515,11554,12534,13488,13489,13645,13649,14609,14617,14672,14677,14678,14679,14682,14683,14745,14784,14816,14917,14919,15461,15558,15559,15560,16438,16439,16440,16653,18160,18176,18590,18591,18595,18596,18747,18749,18750,18751,18752,18795,18796,18797,18798,19091,19092,19108,20662,20663,20779,210044,21872,22142,22143,22144,2…	12534,14745,18160,19091,19092,20779,230103	96	7	7.29167	0.487134	Mouse
mmu00562	Inositol phosphate metabolism	104015,107650,108083,114663,114875,117150,16329,16330,16332,170835,17330,18706,18707,18711,18717,18718,18719,18720,18795,18796,18797,18798,18799,18802,18803,19062,19211,20975,212111,217837,224020,225326,228550,234515,234779,269180,30955,320404,320634,55980,56727,64436,69718,72469,74055,74769,75678	114663,212111,55980	47	3	6.38298	0.47005	Mouse
mmu04810	Regulation of actin cytoskeleton	100044675,101314,104099,105855,107589,108083,108100,109700,109711,109880,110157,11461,11465,11472,11474,117150,11789,11836,11848,11867,12061,12062,12475,12540,12631,12632,12669,12671,12672,12927,12928,12929,12988,13367,13645,13649,13800,14061,14062,14083,14163,14164,14165,14166,14167,14168,14169,14170,14171,14172,14173,14174,14175,14176,14177,14178,14179,14180,14182,14183,14184,14186,14268,14673,…	11461,11465,13800,14182,14183,14184,14186,170758,17886,19353,19354,56378,71960,76709,77579	211	16	7.58294	0.464567	Mouse
mmu04910	Insulin signaling pathway	100705,102093,104215,105787,106628,107476,107746,108079,108099,109880,110078,110094,110095,110157,11651,11652,11836,12015,12313,12314,12315,12402,12702,12703,12928,12929,13684,13685,13712,140491,14104,14120,14121,14251,14252,14377,14784,14936,15461,16150,16331,16333,16334,16337,16367,16369,16370,16653,16890,17346,17347,18176,18534,18576,18607,18641,18642,18679,18682,18706,18707,18708,18709,18710,…	11651,11652,12313,12314,12315,20528,23797,58988,70405,72508	136	10	7.35294	0.460938	Mouse
mmu04612	Antigen processing and presentation	100039790,100042410,100042419,100042479,100043202,100043204,110557,110696,12010,12265,12317,12330,12504,12525,12526,12912,13030,13039,13040,14827,14828,14960,14961,14963,14964,14968,14969,14972,14985,14990,14991,14997,14998,14999,15000,15001,15002,15006,15007,15013,15018,15019,15024,15039,15040,15042,15043,15051,15481,15482,15512,15516,15519,15525,15962,15964,15965,15967,15968,15969,15970,15972,1…	13030,15516,15519,18044,19727,65972	99	7	7.07071	0.451147	Mouse
mmu05030	Amyotrophic lateral sclerosis (ALS)	100045304,12015,12028,12043,12048,12359,12460,14775,18039,18040,19055,19353,20511,20655,20832,22059,271457,380684,545845,631033,667310,74018,85305	19353	23	1	4.34783	0.437212	Mouse
mmu04620	Toll-like receptor signaling pathway	106759,11651,11652,117149,12370,12475,12519,12524,12675,14082,14281,142980,15945,15962,15964,15965,15967,15968,15969,15970,15972,15974,15975,15976,15977,16150,16151,16159,16160,16176,16179,16193,16476,16803,170743,170744,17087,17329,17874,18033,18034,18035,18706,18707,18708,18709,18710,19094,19353,19697,19766,20302,20303,20304,20750,20846,21897,21898,21899,21926,21939,22031,22034,225471,230396,23…	11651,11652,18033,18034,19353,19697,23797	101	7	6.93069	0.427763	Mouse
mmu04120	Ubiquitin mediated proteolysis	100040390,100040961,100042355,100045890,100046119,100046394,100046417,100047342,100763,103583,105193,106052,107568,107986,107995,109161,11634,117146,11796,11797,11798,12189,12211,12234,12402,12702,12703,13194,140499,140629,140630,14897,15204,16396,17222,17237,17246,17318,17344,17999,18854,19823,20437,20438,208650,21402,216080,216150,217232,217342,218793,22034,22192,22193,22194,22195,22196,22200,2…	100040961,20437,20438,21402,22195,22214,28000,56371,56424,68999	140	10	7.14286	0.42091	Mouse
mmu00600	Sphingolipid metabolism	11605,11883,11886,12091,13244,14420,14466,18010,19012,20597,20598,20698,20773,208449,22234,22239,223753,226413,230379,238011,23956,241159,268656,433323,50784,50877,53897,56386,56632,58994,66190,67916,70059,70750,74442,77626,81535	11605,22239	37	2	5.40541	0.418521	Mouse
mmu05340	Primary immunodeficiency	111507,11486,11628,11634,12229,12265,12478,12500,12501,12504,12518,12525,12526,16151,16186,16197,16453,16818,17060,170767,19264,19373,19374,19727,21354,21355,21939,21947,22256,22637,227525,380794,53970,54167,57916,72049,	19727	37	2	5.40541	0.418521	Mouse
mmu04670	Leukocyte transendothelial migration	109711,109905,114141,11461,11465,11472,11474,11848,11855,12385,12386,12387,12388,12540,12562,12737,12738,12739,12740,12741,12767,12927,13057,13058,14083,14677,14678,14679,15894,16401,16408,16409,16412,16414,16415,16428,16456,17390,17395,17698,17898,17906,17907,17969,17970,17972,18260,18417,18613,18706,18707,18708,18709,18710,18750,18751,18752,18803,19094,19229,19247,19303,19353,19354,19877,19878,…	109905,11461,11465,12562,17972,19353,19354,215449	115	8	6.95652	0.41464	Mouse
mmu00970	Aminoacyl-tRNA biosynthesis	102436,104458,105148,107271,107508,109093,110960,15115,20226,212679,216443,22321,22375,224805,226414,226539,230577,234734,23874,244141,272396,27267,353172,381314,631033,66590,67417,69606,69955,70120,70223,70560,70791,71807,71941,71984,85305,97541	224805,234734	38	2	5.26316	0.400035	Mouse
mmu00020	Citrate cycle (TCA cycle)	104112,11428,11429,12974,13382,14194,15926,15929,170718,17448,17449,18293,18534,18563,20916,20917,239017,269951,56451,66052,66925,66945,67680,67834,71832,74551,78920	13382	27	1	3.7037	0.348611	Mouse
mmu05010	Alzheimer's disease	11785,11816,11820,12259,12260,12262,12367,12369,14433,15925,16176,16956,16971,17380,17762,19164,19165,20617,21926,226548,232345,234664,23821,56175,56637,59287,66340,669888	16956	28	1	3.57143	0.328821	Mouse
mmu05216	Thyroid cancer	108989,109880,12387,12443,12550,15461,16653,16842,17869,18176,18211,18510,19016,19713,20181,20182,20183,21414,21415,21416,21787,22059,26395,26396,26413,26417,627557,76551	12443	28	1	3.57143	0.328821	Mouse
mmu00260	Glycine, serine and threonine metabolism	100678,101502,104174,107272,107869,108037,109731,110960,11611,11655,11656,11754,12116,12411,12651,12660,13142,13382,14431,14711,17161,18618,19193,192166,20226,20425,218865,231691,235582,236539,237940,268782,26912,272396,27384,320951,353172,434437,56043,58865,67092,71807,71984,74129,83702	13382,218865	45	2	4.44444	0.286146	Mouse
mmu00565	Ether lipid metabolism	100163,102247,18472,18475,18476,18606,18778,18780,18781,18782,18783,18784,18805,18806,19012,225010,228061,26565,26970,26971,27226,28169,320981,329502,50784,53357,55979,66350,67512,67916,68262,69836	18472	32	1	3.125	0.258639	Mouse
mmu00330	Arginine and proline metabolism	104458,107508,109093,109900,11846,11847,11898,12709,12715,12716,13142,14431,14661,14718,14719,18125,18126,18127,18242,18416,18451,18452,19125,209027,212647,227231,230577,320452,329504,56189,66988,67092,69051,76722	212647	34	1	2.94118	0.228607	Mouse
mmu01430	Cell Communication,	105866,107656,109052,110308,110310,114566,11461,11465,118446,118454,12643,12814,12815,12821,12824,12825,12826,12827,12829,12831,12832,12833,12834,12842,12843,12845,13346,13505,13506,13507,13510,13511,13512,14268,14609,14610,14611,14612,14613,14615,14616,14617,14618,14619,14620,14621,14622,14623,15891,16403,16660,16661,16663,16664,16665,16666,16667,16668,16669,16670,16671,16672,16675,16678,16679,1…	11461,11465,12845,21825,21826,21827,21828	130	7	5.38462	0.167173	Mouse
mmu00350	Tyrosine metabolism	109731,11522,11529,11532,11670,116939,11754,11761,12846,13166,13190,13195,14085,14718,14719,14874,15233,15445,17161,17319,18948,21823,22018,22173,22178,225010,234724,237940,26876,51798,52686,56292,56441,56847,66138,67011,67689,67877,69536	21823	39	1	2.5641	0.166498	Mouse
mmu04940	Type I diabetes mellitus	100039790,100042410,100042419,100042479,100043202,100043204,100048845,110557,110696,12487,12519,12524,12876,14102,14103,14415,14417,14939,14960,14961,14963,14964,14968,14969,14972,14985,14990,14991,14997,14998,14999,15000,15001,15002,15006,15007,15013,15018,15019,15024,15039,15040,15042,15043,15051,15510,15893,15978,16159,16160,16175,16176,16183,16333,16334,16992,18646,19275,19276,21926,224753,22…	14415,14417,15510	71	3	4.22535	0.165447	Mouse
mmu00051	Fructose and mannose metabolism	101502,103988,110119,11674,11676,11677,11997,14120,14121,14187,15275,15277,16548,170768,18640,18641,18642,20322,212032,218138,219135,21991,22122,230163,234730,270198,27384,29858,320011,331026,53332,54128,54384,56043,56421,66681,75454,75540,76429,77116,83702	20322	41	1	2.43902	0.146231	Mouse
mmu04630	Jak-STAT signaling pathway	100044793,101809,114715,114716,11651,11652,12048,12402,12443,12444,12445,12700,12702,12703,12803,12804,12914,12981,12982,12983,12984,12985,12986,13019,13856,13857,14599,14600,14784,15170,15962,15964,15965,15967,15968,15969,15970,15972,15974,15975,15976,15977,15978,15979,15980,16153,16154,16155,16156,16157,16158,16159,16160,16161,16162,16163,16164,16165,16168,16169,16183,16184,16185,16186,16187,16…	11651,11652,12443,12444,12445,12914,23797,328572	155	8	5.16129	0.112672	Mouse
mmu03410	Base excision repair	100038833,100039851,100041140,100041307,100042515,100044152,100045714,100045876,100046823,100046847,100048343,11545,11546,11792,14156,15289,16881,16882,17193,18207,18294,18538,18970,18971,18972,18973,18974,21665,22256,22594,234258,235587,268395,328417,382913,385454,432959,434174,545124,56626,59001,619937,624784,625781,634880,637733,638585,66979,67967,69745,70603,71726,72774,77622	18971	54	1	1.85185	0.060854	Mouse
mmu04650	Natural killer cell mediated cytotoxicity	100048622,109880,110157,111507,11836,12122,12367,12503,12506,12981,14102,14103,14127,14131,14360,14784,14939,14964,14972,15040,15101,15170,15461,15894,15896,15962,15964,15965,15967,15968,15969,15970,15972,15974,15975,15976,15977,15978,15979,15980,16408,16414,16415,16627,16634,16635,16638,16639,16640,16641,16642,16643,16653,16797,16818,16822,17059,170758,17086,18018,18019,18021,18106,18176,18479,1…	14360,170758,19058,19353,19354	129	5	3.87597	0.0453598	Mouse
mmu01030	Glycan structures - biosynthesis 1	102580,103534,103963,107895,108148,108150,108155,108760,108902,117592,13135,13200,13478,14042,14043,140481,14376,14423,14425,14426,14537,14595,15476,15478,15531,171212,17155,17156,17158,17308,17309,17423,195646,20014,20440,20441,20442,20443,20444,20445,207839,207958,208211,208624,212996,217119,217664,217734,218271,223774,227327,227619,230145,230815,231050,233733,233781,234356,23908,241391,268510,…	13200,13478,74241	116	4	3.44828	0.0372248	Mouse
mmu04640	Hematopoietic cell lineage	100044793,109700,111507,12475,12478,12479,12480,12481,12482,12483,12484,12489,12490,12491,12493,12494,12500,12501,12502,12504,12505,12507,12509,12516,12525,12526,12527,12902,12977,12978,12981,12982,12985,12986,13136,13137,13856,13857,14128,14129,14255,14256,14723,14724,14729,14968,14969,16156,16157,16158,16175,16176,16177,16178,16184,16187,16188,16189,16190,16191,16192,16193,16194,16196,16197,161…	12491,12902	86	2	2.32558	0.0260178	Mouse
mmu04610	Complement and coagulation cascades	109821,109828,110135,110382,11537,11905,12061,12062,12258,12259,12260,12262,12263,12266,12267,12268,12269,12273,12274,12279,12509,12628,12630,12902,12946,13136,13137,14058,14060,14061,14062,14066,14067,14068,14069,14071,14161,14962,15139,15160,16621,16644,17174,17175,17194,17195,17221,18787,18791,18792,18793,18815,18816,19123,19128,20700,20701,20703,20704,21788,21824,22371,230558,232345,268591,31…	12902	74	1	1.35135	0.014582	Mouse
mmu04514	Cell adhesion molecules (CAMs)	100039790,100042410,100042419,100042479,100043202,100043204,100048845,102657,104099,110557,110696,114141,11658,12477,12481,12483,12487,12490,12504,12511,12519,12524,12525,12526,12550,12555,12558,12560,12561,12562,12737,12738,12739,12740,12741,12805,13003,14663,14960,14961,14963,14964,14968,14969,14972,14985,14990,14991,14997,14998,14999,15000,15001,15002,15006,15007,15013,15018,15019,15024,15039,…	12558,12561,12562,225825	158	4	2.53165	0.00316835	Mouse
mmu04740	Olfactory transduction	100045547,104111,107477,108058,110511,117004,117005,12313,12314,12315,12322,12323,12325,12722,12790,14680,14913,170639,18307,18310,18312,18313,18314,18315,18316,18317,18322,18323,18324,18328,18329,18330,18331,18332,18341,18343,18344,18345,18346,18348,18349,18350,18352,18354,18356,18357,18359,18361,18362,18363,18365,18366,18367,18368,18369,18370,18372,18373,18575,18747,18749,19091,19092,19108,1930…	108058,12313,12314,12315,12322,12323,12325,18575,19091,19092,216869,70405	947	17	1.79514	1.51334e-19	Mouse
mmu00512	O-Glycan biosynthesis	108148,108150,108155,108760,14423,14425,14426,14537,171212,20442,20444,20445,207839,212996,230145,231050,233733,241391,271786,272411,56336,59048,67909,71685,72077,78754,94192		27	0	0	0	Mouse
mmu00100	Biosynthesis of steroids	110196,13115,13121,13360,13595,14137,14593,15357,15490,16987,17855,18104,18194,192156,20775,235293,27973,319554,56316,66234,68603,73166,74754		23	0	0	0	Mouse
mmu00592	alpha-Linolenic acid metabolism	11430,18778,18780,18781,18782,18783,18784,26565,26970,26971,329502,53357,56473,66350,69836,80911		16	0	0	0	Mouse
mmu00601	Glycosphingolipid biosynthesis - lactoseries	108105,14343,14344,14594,20441,20443,26877,26878,80908,93961		10	0	0	0	Mouse
mmu05050	Dentatorubropallidoluysian atrophy (DRPLA)	100044207,107568,108100,12362,12367,12369,12370,13498,14433,14924,16333,16334,16337,16396,66894,68703		16	0	0	0	Mouse
mmu00602	Glycosphingolipid biosynthesis - neo-lactoseries	108105,108902,14343,14344,14345,14347,14348,14538,14594,14595,20449,231727,53418,54613,56375,57370,72297,80908		18	0	0	0	Mouse
mmu00625	Tetrachloroethene degradation	101502,13850,27384,56043,83702		5	0	0	0	Mouse
mmu00130	Ubiquinone biosynthesis	12850,17716,17717,17718,17719,17720,17721,17722,217707,230027,52064,71883		12	0	0	0	Mouse
mmu00140	C21-Steroid hormone metabolism	105349,13070,13072,13074,13079,15483,15484,15492,15493,15495,15496,15497,208665		13	0	0	0	Mouse
mmu02010	ABC transporters	11303,11304,11305,11306,11307,11666,12638,12780,17250,18669,18670,18671,192663,19299,19300,20927,20928,21354,21355,217258,217262,217265,224814,244562,26357,26874,27403,27404,27405,27409,27410,27413,27416,27421,56199,56325,67470,74104,74610,76184,76408		41	0	0	0	Mouse
mmu00604	Glycosphingolipid biosynthesis - ganglioseries	11416,12091,14421,15211,15212,20442,20444,20447,20448,20449,20454,225742,226413,26938,50935,54218		16	0	0	0	Mouse
mmu00511	N-Glycan degradation	110173,11593,12091,15211,15212,17159,17160,18010,226413,23956,241159,50877,66848,71665,73744		15	0	0	0	Mouse
mmu00624	1- and 2-Methylnaphthalene degradation	11522,11529,11532,116939,225010,229211,26876,56292,56441,66948,67877		11	0	0	0	Mouse
mmu00460	Cyanoamino acid metabolism	108037,14598,20425,207182,23887,66514,71522		7	0	0	0	Mouse
mmu05310	Asthma	100039790,100042410,100042419,100042479,100043202,100043204,111507,13861,14125,14126,14127,14960,14961,14968,14969,14998,14999,15000,15001,15002,16153,16163,16187,16189,16191,16198,19074,20292,21926,21939,21947,380794,621968,667476,671652		35	0	0	0	Mouse
mmu05320	Autoimmune thyroid disease	100039790,100042410,100042419,100042479,100043202,100043204,100048845,110557,110696,111507,12477,12487,12519,12524,12640,14102,14103,14939,14960,14961,14963,14964,14968,14969,14972,14985,14990,14991,14997,14998,14999,15000,15001,15002,15006,15007,15013,15018,15019,15024,15039,15040,15042,15043,15051,15962,15964,15965,15967,15968,15969,15970,15972,15974,16153,16183,16189,16191,18646,21819,21939,21…		81	0	0	0	Mouse
mmu00030	Pentose phosphate pathway	100198,110208,110639,11674,11676,14120,14121,14380,14381,14751,18641,18642,19139,19895,21351,21881,230163,232449,328099,56421,66171,66646,71336,72157,74419,75456,83553		27	0	0	0	Mouse
mmu00550	Peptidoglycan biosynthesis	14645,21946,242100,57757		4	0	0	0	Mouse
mmu05332	Graft-versus-host disease	100039790,100042410,100042419,100042479,100043202,100043204,100048845,110557,110696,12487,12519,12524,14102,14103,14939,14960,14961,14963,14964,14968,14969,14972,14985,14990,14991,14997,14998,14999,15000,15001,15002,15006,15007,15013,15018,15019,15024,15039,15040,15042,15043,15051,15978,16175,16176,16183,16193,16627,16634,16638,16640,16641,16643,18646,21926,224753,224754,224756,224761,333715,3995…		66	0	0	0	Mouse
mmu00533	Keratan sulfate biosynthesis	108902,14595,20441,20442,20443,20444,227327,26887,53418,53618,54371,56375,56773,57370,76969		15	0	0	0	Mouse
mmu00534	Heparan sulfate biosynthesis	14042,14043,15476,15478,15531,17423,195646,23908,319415,50785,50786,50787,54616,54710,56219,58193,64580,83398,93683		19	0	0	0	Mouse
mmu05330	Allograft rejection	100039790,100042410,100042419,100042479,100043202,100043204,100048845,110557,110696,111507,12487,12519,12524,14102,14103,14939,14960,14961,14963,14964,14968,14969,14972,14985,14990,14991,14997,14998,14999,15000,15001,15002,15006,15007,15013,15018,15019,15024,15039,15040,15042,15043,15051,15978,16153,16159,16160,16183,16189,16191,18646,21926,21939,21947,224753,224754,224756,224761,333715,380794,39…		66	0	0	0	Mouse
mmu00053	Ascorbate and aldarate metabolism	110695,11669,11671,22235,268756,56727,56752,72535		8	0	0	0	Mouse
mmu03022	Basal transcription factors	102162,108143,14884,14885,14886,209357,21343,21374,216185,225895,226182,228980,229906,235459,237336,23894,24074,24075,270627,319944,407786,545600,57080,66464,68153,68705,68776,71828,72504,74197,74469,83602,98053,99730		34	0	0	0	Mouse
mmu00061	Fatty acid biosynthesis	100705,107476,14104,223722,71147,99035		6	0	0	0	Mouse
mmu00530	Aminosugars metabolism	103988,107652,109754,109785,12763,12764,14583,14584,15211,15212,15275,15277,19703,212032,219135,245847,26384,53332,54342,54384,67311,67980,71884,72017,74091,74245,75454,76429,77116,81600,94181		31	0	0	0	Mouse
mmu00531	Glycosaminoglycan degradation	110006,11881,12091,15211,15212,15442,15586,15587,15931,15932,20690,226413,50917,52120,545291		15	0	0	0	Mouse
mmu00031	Inositol metabolism	104776,21991		2	0	0	0	Mouse
mmu00564	Glycerophospholipid metabolism	102247,104418,110197,110524,11423,116939,12647,12651,12660,13026,13139,14555,14571,14712,14732,16816,18618,18777,18778,18780,18781,18782,18783,18784,18805,18806,19012,19210,192654,217480,225010,236899,237928,26394,26565,26970,26971,27388,28169,320951,329502,50784,52858,53357,55979,56292,56441,66350,66586,67512,67877,67916,68262,68671,69836,74596,75320		57	0	0	0	Mouse
mmu00563	Glycosylphosphatidylinositol(GPI)-anchor biosynthesis	110417,13481,14731,14755,14756,18700,18701,228812,230801,241062,27392,276846,327942,329777,55981,56176,56703,66268,67292,67556,70325,72084,78928		23	0	0	0	Mouse
mmu04060	Cytokine-cytokine receptor interaction	100044793,100047704,110542,11477,11479,11480,11481,11482,11705,12145,12156,12162,12166,12167,12168,12458,12765,12766,12767,12768,12769,12770,12771,12772,12773,12774,12775,12776,12777,12803,12804,12977,12978,12981,12982,12983,12984,12985,12986,13019,13051,13607,13608,13645,13649,13856,13857,140806,14102,14103,14205,14254,14255,14256,14257,14563,14600,14825,15234,15945,15962,15964,15965,15967,15968…		249	0	0	0	Mouse
mmu00910	Nitrogen metabolism	107869,12346,12349,12350,12351,12352,12353,12354,14645,14660,14661,15109,216456,227231,230099,23831,27053,434437,56078,66514,76459		21	0	0	0	Mouse
mmu00903	Limonene and pinene degradation	110695,11669,11671,116939,225010,226418,329910,56292,56360,56441,56752,67877,72535,74147,93747,97212		16	0	0	0	Mouse
mmu00920	Sulfur metabolism	20860,20865,20887,211389,23827,23971,23972,54200,58250,59031,71797		11	0	0	0	Mouse
mmu00300	Lysine biosynthesis	231326,23923,30956,631033,85305		5	0	0	0	Mouse
mmu00785	Lipoic acid metabolism	623661,67164,79464		3	0	0	0	Mouse
mmu00272	Cysteine metabolism	106557,107869,12583,14718,14719,16828,16832,16833,231691,246221,27267,433229,71941		13	0	0	0	Mouse
mmu00900	Terpenoid biosynthesis	110196,14137,14593,20775,319554		5	0	0	0	Mouse
mmu00791	Atrazine degradation	11810,11811,56417,80287		4	0	0	0	Mouse
mmu00363	Bisphenol A degradation	101502,18979,269823,27384,330260,56043,83702		7	0	0	0	Mouse
mmu01031	Glycan structures - biosynthesis 2	108105,108902,110417,13481,14343,14344,14345,14347,14348,14421,14538,14594,14595,14731,14755,18700,18701,20441,20442,20443,20444,20447,20448,20449,20454,22234,225742,227671,228812,230801,231727,239559,239827,26877,26878,26879,26938,27392,276846,327942,329777,433931,50935,53418,54218,54613,55981,56176,56375,56386,56703,57370,66268,67292,67556,72084,72297,78928,80908,93961		60	0	0	0	Mouse
mmu01040	Biosynthesis of unsaturated fatty acids	106529,111175,113868,11430,12012,14104,170439,170789,171210,171281,171282,20249,20250,217698,217700,226418,235674,26897,30049,329910,54326,56348,56360,56473,68801,70025,70757,76267,80911,97212		30	0	0	0	Mouse
mmu01032	Glycan structures - degradation	110006,110173,11593,11881,12091,14466,15211,15212,15442,15586,15587,15931,15932,17159,17160,18010,20690,226413,23956,241159,50877,50917,52120,545291,66848,71665,73744		27	0	0	0	Mouse
mmu00340	Histidine metabolism	109731,110695,11484,11669,11670,11671,13195,140483,14317,15109,15115,15186,17161,243537,338403,52686,56752,56847,66138,67011,67689,69536,70791,71670,71761,72535,76507		27	0	0	0	Mouse
mmu00440	Aminophosphonate metabolism	13026,236899,52686,66138,67011,68671,69536		7	0	0	0	Mouse
mmu00950	Alkaloid biosynthesis I	13195,14718,14719,22173,234724		5	0	0	0	Mouse
mmu00471	D-Glutamine and D-glutamate metabolism	14660,14661,216456		3	0	0	0	Mouse
mmu00271	Methionine metabolism	107869,11702,11720,12116,12411,13433,13434,13435,13436,20810,212679,216443,229709,232087,234724,238505,269378,54427,668932,66902,69606,74340		22	0	0	0	Mouse
mmu00643	Styrene degradation	14085,14874,15233		3	0	0	0	Mouse
mmu00641	3-Chloroacrylic acid degradation	110695,11522,11529,11532,11669,11671,26876,56752,72535		9	0	0	0	Mouse
mmu00472	D-Arginine and D-ornithine metabolism	13142		1	0	0	0	Mouse
mmu00450	Selenoamino acid metabolism	107869,109079,11720,12411,14598,207182,20768,212679,216443,229709,232087,23887,23971,23972,269378,50880,52686,66138,67011,69536,71522,74340		22	0	0	0	Mouse
mmu00232	Caffeine metabolism	13077,13085,13086,13087,17960,17961,17962,22262,22436		9	0	0	0	Mouse
mmu00220	Urea cycle and metabolism of amino groups	109652,109731,109900,110695,11669,11671,11702,11846,11847,11898,17161,18263,18416,20229,20603,20810,217214,227231,242669,56454,56752,67092,69215,72535,75986,76507		26	0	0	0	Mouse
mmu04710	Circadian rhythm	100048334,104318,11865,12753,12952,12953,18143,18626,18627,18628,20893,217166,27373,79362		14	0	0	0	Mouse
mmu03450	Non-homologous end-joining	100044170,14156,14375,17535,19090,19360,21673,22596,227525,319583,54125,56626,75570		13	0	0	0	Mouse
mmu00760	Nicotinate and nicotinamide metabolism	103850,107569,11761,12182,12494,18113,18115,18605,18950,192185,209558,225994,226518,230718,23959,50773,59027,66454,667034,67375,67993,70881,74080,76952,78914		25	0	0	0	Mouse
mmu04614	Renin-angiotensin system	11421,11606,11607,11608,11609,12873,13035,13809,16790,17171,17228,17380,19025,19701,19702,240028,50492,70008,75805		19	0	0	0	Mouse
mmu00780	Biotin metabolism	110948,26363,66624,69019		4	0	0	0	Mouse
mmu00770	Pantothenate and CoA biosynthesis	103149,106564,12035,12036,18605,209558,211347,22361,269614,64705,66812,71743,74450,75735,99586		15	0	0	0	Mouse
mmu00730	Thiamine metabolism	105663,18041,219135,53332,54384,75454,76429,77116		8	0	0	0	Mouse
mmu00720	Reductive carboxylate cycle (CO2 fixation)	104112,11428,11429,14194,15926,17448,17449,269951,60525,68738		10	0	0	0	Mouse
mmu00750	Vitamin B6 metabolism	103711,107272,11761,216134,57028		5	0	0	0	Mouse
mmu00740	Riboflavin metabolism	11431,11432,11433,18605,209558,219135,22173,319945,53332,54384,54391,56318,66659,75454,76429,77116		16	0	0	0	Mouse
Human KEGG
KEGG Pathway id	Pathway Name	KEGG Gene Set	Genes Mapped	KEGG Gene Set Count	No. of Genes Mapped	%of Genes Mapped	Hypergeometeric Probability	Organism
hsa00982	Drug metabolism - cytochrome P450	10720,10941,119391,124,125,126,127,128,130,131,1544,1548,1549,1551,1553,1555,1557,1558,1559,1562,1565,1571,1576,1577,218,220,221,221357,222,2326,2327,2328,2329,2330,2938,2939,2940,2941,2944,2946,2947,2948,2949,2950,2952,2953,2954,316,373156,4128,4129,4257,4258,4259,54490,54575,54576,54577,54578,54579,54600,54657,54658,54659,64816,7363,7364,7365,7366,7367,79799,9446	10720,10941,119391,1551,1576,1577,2326,2327,2328,2329,2330,2952,2953,54490,54575,54576,54577,54578,54579,54600,54657,54658,54659,64816,7363,7364,7366,7367,79799,9446	72	30	41.6667	1	Human
hsa00040	Pentose and glucuronate interconversions	10720,10941,231,2990,51181,54490,54575,54576,54577,54578,54579,54600,54657,54658,54659,6120,7358,7360,7363,7364,7365,7366,7367,79799,9942	10720,10941,54490,54575,54576,54577,54578,54579,54600,54657,54658,54659,7363,7364,7366,7367,79799	25	17	68	1	Human
hsa00983	Drug metabolism - other enzymes	10,1066,10720,10941,151531,1548,1549,1551,1553,1576,1577,1806,1807,1890,221223,2990,3251,3614,3615,3704,3988,51733,54490,54575,54576,54577,54578,54579,54600,54657,54658,54659,54963,64816,7083,7084,7172,7363,7364,7365,7366,7367,7371,7372,7378,7498,79799,83549,8824,8833,9,978	10720,10941,1551,1576,1577,54490,54575,54576,54577,54578,54579,54600,54657,54658,54659,54963,64816,7363,7364,7366,7367,7371,79799	52	23	44.2308	1	Human
hsa00980	Metabolism of xenobiotics by cytochrome P450	10720,10941,1109,119391,124,125,126,127,128,130,131,1543,1544,1545,1551,1555,1557,1558,1559,1562,1571,1572,1576,1577,1645,1646,2052,218,220,221,221357,222,27294,2938,2939,2940,2941,2944,2946,2947,2948,2949,2950,2952,2953,2954,29785,373156,4257,4258,4259,54490,54575,54576,54577,54578,54579,54600,54657,54658,54659,64816,7363,7364,7365,7366,7367,79799,8644,9446	10720,10941,119391,1551,1576,1577,2952,2953,54490,54575,54576,54577,54578,54579,54600,54657,54658,54659,64816,7363,7364,7366,7367,79799,9446	70	25	35.7143	1	Human
hsa00860	Porphyrin and chlorophyll metabolism	10720,10941,124454,1352,1355,1356,1371,2058,210,211,212,2235,2495,2990,3052,3145,3162,3163,326625,54490,54575,54576,54577,54578,54579,54600,54657,54658,54659,5498,644,645,7363,7364,7365,7366,7367,7389,7390,79799,94033	10720,10941,2495,54490,54575,54576,54577,54578,54579,54600,54657,54658,54659,7363,7364,7366,7367,79799	41	18	43.9024	1	Human
hsa00830	Retinol metabolism	10170,10720,10901,10941,124,125,126,127,128,130,131,145226,1543,1544,1548,1549,1551,1553,1555,1557,1558,1559,1562,157506,1576,1577,1579,158835,1592,216,284541,317749,340665,50700,51109,53630,54490,54575,54576,54577,54578,54579,54600,54657,54658,54659,54884,56603,5959,6121,64816,727765,7363,7364,7365,7366,7367,79799,8228,84649,8608,8694,8854,9227,9249	10720,10941,1551,1576,1577,1579,284541,54490,54575,54576,54577,54578,54579,54600,54657,54658,54659,64816,7363,7364,7366,7367,79799	65	23	35.3846	1	Human
hsa00150	Androgen and estrogen metabolism	10720,10941,1109,114049,131965,1584,1585,1588,3283,3284,3290,3291,3292,3293,3294,412,414,415,51144,51409,51451,51478,54490,54575,54576,54577,54578,54579,54600,54657,54658,54659,55798,60487,6715,6716,6718,6783,6820,6822,7363,7364,7365,7366,7367,7923,79799,9836	10720,10941,54490,54575,54576,54577,54578,54579,54600,54657,54658,54659,7363,7364,7366,7367,79799	48	17	35.4167	1	Human
hsa00500	Starch and sucrose metabolism	10720,10941,11181,178,2538,2548,2595,2629,2632,2645,276,277,278,279,280,2821,2990,2997,2998,3098,3099,3101,5167,5169,5236,5238,54490,54575,54576,54577,54578,54579,54600,54657,54658,54659,57733,57818,5834,5836,5837,6476,7358,7360,7363,7364,7365,7366,7367,79799,80146,84569,8972	10720,10941,54490,54575,54576,54577,54578,54579,54600,54657,54658,54659,7363,7364,7366,7367,79799,84569	53	18	33.9623	1	Human
hsa04530	Tight junction	10000,1019,10207,103910,10398,10627,10686,11336,1364,1365,1366,137075,1457,1459,1460,149461,1495,1496,1499,150084,154810,2017,2035,2036,2037,207,208,22800,22808,22989,23136,23562,24146,260425,26285,27134,2770,2771,2773,28227,29119,29895,3059,3265,333926,3845,387,3993,3996,4301,4619,4620,4621,4622,4624,4625,4626,4627,4628,4629,4633,4636,4893,4950,49861,5010,50848,50855,51208,51776,53842,5515,5516,…	10000,1019,1460,207,208,22989,4619,4620,4621,4622,4624,4625,4626,4627,4628,4629,50855,5515,5516,5518,5519,57644,60,6709,6714,71,7525,79784,84552,84612,8573,9218	138	32	23.1884	1	Human
hsa04110	Cell cycle	100131844,1017,1019,1021,1022,1026,1027,1028,1029,1030,1031,1032,10393,10459,10744,10912,10926,10971,1111,11200,1387,1647,1869,1870,1871,2033,23594,23595,246184,25,27127,2810,2932,29882,29945,3065,3066,4085,4087,4088,4089,4171,4172,4173,4174,4175,4176,4193,4616,472,4998,4999,5000,5001,5111,51343,51433,51434,51529,5347,545,5591,5925,5933,5934,595,64682,6500,6502,650621,651610,699,701,7027,7040,704…	1017,1019,1021,10393,10459,1387,1870,1871,2033,4998,51343,5347,595,6500,699,85417,8555,8556,890,8900,891,894,896,898,902,9133,9134,9700,983	119	29	24.3697	1	Human
hsa05110	Vibrio cholerae infection	10312,1080,109,10945,10952,11014,11015,115,127124,155066,23480,23545,245972,245973,2778,29927,30001,375,3784,4583,50617,51382,51606,523,525,526,527,528,529,533,5335,5336,534,535,537,55176,5566,5567,5568,5578,5579,5582,5613,5616,58,59,60,646048,646821,648921,6558,70,7082,71,72,8992,90423,9114,9296,9414,9550,9601	10312,10945,11014,11015,23480,23545,245973,50617,528,533,535,537,58,59,60,70,71,72	62	18	29.0323	0.999998	Human
hsa04330	Notch signaling pathway	10683,11317,113878,1387,1487,1488,151636,171558,182,1840,1855,1856,1857,196403,2033,22938,23220,23385,2648,28514,3065,3066,3280,3516,3714,3955,4242,4851,4853,4854,4855,51107,54567,55534,55851,5663,5664,5986,6868,84441,8650,8850,9253,9541,9612,9794	113878,1387,1487,1488,151636,1840,2033,23220,28514,4851,4853,4854,4855,54567	46	14	30.4348	0.999988	Human
hsa04350	TGF-beta signaling pathway	1030,10468,10637,130399,1311,1387,151449,1634,1874,1875,2033,268,269,3397,3398,3399,3400,3458,353500,3624,3625,3626,387,392255,4052,4086,4087,4088,4089,4090,4091,4092,4093,4609,4838,5308,5515,5516,5518,5519,5520,5521,5522,5594,5595,57154,5933,5934,6093,6198,6199,64750,650,6500,652,653,654,655,656,657,658,659,6667,7027,7040,7042,7043,7044,7046,7048,7057,7058,7059,7060,7124,728622,8200,83729,8454,8…	1311,1387,1874,1875,2033,4086,4090,4091,4092,4093,5515,5516,5518,5519,6198,6199,6500,7057,7058,7059,7060	90	21	23.3333	0.999977	Human
hsa00190	Oxidative phosphorylation	100128525,100133737,10063,10312,10476,10632,10975,125965,126328,127124,1327,1329,1337,1339,1340,1345,1346,1347,1349,1350,1351,1352,1355,1537,155066,170712,23545,245972,245973,27068,27089,29796,341947,374291,390424,440567,4508,4509,4512,4513,4514,4519,4535,4536,4537,4538,4539,4540,4541,4694,4695,4696,4697,4698,4700,4701,4702,4704,4705,4706,4707,4708,4709,4710,4711,4712,4713,4714,4715,4716,4717,471…	10312,10632,126328,1345,1346,1347,23545,245973,27068,27089,374291,4700,4706,4707,4719,4722,4729,496,498,50617,514,528,533,535,537,5464,7384,9167	137	28	20.438	0.999976	Human
hsa04115	p53 signaling pathway	1017,1019,1021,1026,1029,10912,1111,11200,143686,1643,1647,25898,27113,27244,2810,317,3479,3486,355,3732,4193,4194,4616,472,50484,5054,51246,51512,5268,5366,54205,545,55240,55367,56475,5728,575,581,595,6241,637,63970,64065,64326,64393,6477,651610,7057,7157,7161,7249,836,83667,841,842,8493,85417,8795,891,894,896,898,900,901,9133,9134,9538,9540,983	1017,1019,1021,3486,595,6477,7057,85417,891,894,896,898,900,901,9133,9134,983	69	17	24.6377	0.999949	Human
hsa04310	Wnt signaling pathway	10023,10297,10725,11197,11211,11261,122011,1387,144165,1452,1454,1457,1459,1460,1487,1488,1499,166336,1855,1856,1857,2033,22943,23002,23236,23291,23401,23500,2535,27101,27121,27123,2932,324,3725,387,4040,4041,4087,4088,4089,4316,4609,4772,4773,4775,4776,51176,51384,51701,5330,5331,5332,54361,5467,5515,5516,5518,5519,5520,5521,5522,5530,5532,5533,5534,5535,5566,5567,5568,5578,5579,5582,5599,5601,5…	1387,144165,1460,1487,1488,166336,2033,2535,5515,5516,5518,5519,5534,5879,5880,5881,595,6477,6500,7483,7484,815,816,817,818,8321,8324,894,896	150	29	19.3333	0.999947	Human
hsa05214	Glioma	10000,1019,1021,1026,1029,163688,1869,1870,1871,1950,1956,207,208,23533,2475,25759,2885,3265,3479,3480,369,3845,399694,4193,4893,5154,5155,5156,5159,51806,5290,5291,5293,5294,5295,5296,5335,53358,5336,5578,5579,5582,5594,5595,5604,5605,5728,5894,5925,595,6464,6654,6655,673,7039,7157,801,805,808,810,815,816,817,818,8503	10000,1019,1021,1870,1871,207,208,595,801,805,808,810,815,816,817,818	65	16	24.6154	0.999921	Human
hsa05215	Prostate cancer	10000,1017,1026,1027,10488,1147,1385,1387,148327,1499,1869,1870,1871,1950,1956,2033,2064,207,208,2260,2263,2308,23533,2475,2885,2932,2950,3265,3320,3326,3479,3480,354,3551,3630,3645,367,369,3845,4193,468,4790,4791,4792,4824,4893,51176,5154,5155,5156,5159,5170,5290,5291,5293,5294,5295,5296,5594,5595,56034,5604,5605,572,5728,5894,5925,595,596,5970,64764,6654,6655,6715,6716,673,6932,6934,7039,7157,7…	10000,1017,1387,1870,1871,2033,207,208,2260,2263,3320,3326,4790,4791,595,5970,7184,898,9134	91	19	20.8791	0.99974	Human
hsa00620	Pyruvate metabolism	10873,134526,160287,1737,1738,197257,217,218,219,220,223,224,231,2739,3029,31,32,38,39,3939,3945,3948,4190,4191,4199,4200,501,5091,5105,5106,5160,5161,5162,5313,5315,55902,84264,84532,92483,9380,97,98	10873,1737,1738,3029,38,39,4199,4200,5160,5161,84264	42	11	26.1905	0.999631	Human
hsa05040	Huntington's disease	1211,1212,1213,1387,163688,1639,2033,2597,2885,3064,3092,3093,51806,55081,581,5921,627,7052,7157,801,805,808,810,8218,834,836,839,841,84725,875,9001,9611	1211,1212,1213,1387,2033,801,805,808,810	32	9	28.125	0.999482	Human
hsa05212	Pancreatic cancer	10000,1019,1021,1029,10928,1147,130399,1869,1870,1871,1950,1956,2064,207,208,2277,23533,3551,369,3716,3845,4087,4088,4089,4790,4791,5228,5290,5291,5293,5294,5295,5296,5337,5594,5595,5599,5601,5602,5604,572,5879,5880,5881,5888,5894,5898,5899,5900,5925,595,5970,598,673,675,6772,6774,7039,7040,7042,7043,7046,7048,7157,7422,7423,7424,842,8503,8517,91,9459,998	10000,1019,1021,1870,1871,207,208,4790,4791,5879,5880,5881,5888,595,5970	73	15	20.5479	0.998904	Human
hsa04720	Long-term potentiation	10411,107,11261,114,1387,163688,2033,23236,27330,2776,2890,2891,2902,2903,2904,2905,2906,2911,2915,3265,369,3708,3709,3710,3845,4659,468,4893,51806,5330,5331,5332,5499,5500,5501,5502,5530,5532,5533,5534,5535,5566,5567,5568,5578,5579,5582,5594,5595,5604,5605,5613,5616,5894,5906,5908,6195,6196,6197,63928,673,775,801,805,808,810,814,815,816,817,818	1387,2033,5534,5906,5908,801,805,808,810,814,815,816,817,818	71	14	19.7183	0.997704	Human
hsa00252	Alanine and aspartate metabolism	122622,1384,158,159,16,1615,1737,1738,18,189,2571,2572,2805,2806,2875,435,440,443,445,4677,5091,5160,5161,5162,55157,57505,64902,790,79731,80150,84706,8528,91703	16,1737,1738,2571,2572,5160,5161,57505	33	8	24.2424	0.997149	Human
hsa05120	Epithelial cell signaling in Helicobacter pylori infection	102,10312,10392,1147,127124,1432,1445,150084,155066,1839,1956,23545,245972,245973,28964,2919,3551,3576,3577,3579,3725,4067,4233,4790,4791,4792,5058,50617,50848,51382,51606,523,525,526,527,528,529,533,5335,5336,534,535,537,5599,5600,5601,5602,5603,5781,5803,58494,5879,5970,6300,6352,6416,6714,6868,7082,836,83700,8517,8992,9020,90423,9114,9296,9550,998	10312,23545,245973,4790,4791,50617,528,533,535,537,5879,5970,6714	69	13	18.8406	0.99531	Human
hsa05012	Parkinson's disease	100128525,100133737,10476,10975,11315,118424,120892,125965,1327,1329,1337,1339,1340,1345,1346,1347,1349,1350,1351,1537,170712,27089,27429,2861,291,292,293,29796,317,341947,374291,390424,440567,4508,4509,4512,4513,4514,4519,4535,4536,4537,4538,4539,4540,4541,4694,4695,4696,4697,4698,4700,4701,4702,4704,4705,4706,4707,4708,4709,4710,4711,4712,4713,4714,4715,4716,4717,4718,4719,4720,4722,4723,4724,4…	1345,1346,1347,27089,374291,4700,4706,4707,4719,4722,4729,498,514,7054,729317,7332,7384,7416,7417,7419,9167	136	21	15.4412	0.991358	Human
hsa00071	Fatty acid metabolism	10449,10455,124,125,126,126129,127,128,130,131,1374,1375,1376,1579,1632,1892,1962,217,218,2180,2181,2182,219,220,223,224,23305,2639,284541,30,3028,3030,3032,3033,3295,33,34,35,36,37,38,39,501,51,51703,8310	10449,1579,2181,2182,284541,3028,3032,38,39	46	9	19.5652	0.990246	Human
hsa00770	Pantothenate and CoA biosynthesis	1806,1807,5167,5169,51733,53354,55229,586,587,60490,79646,79717,80025,80347,8876	53354,55229,79646,80025	15	4	26.6667	0.989749	Human
hsa00430	Taurine and hypotaurine metabolism	1036,124975,2571,2572,2678,2686,2687,51380,570,84890	2571,2572,51380	10	3	30	0.989317	Human
hsa00062	Fatty acid elongation in mitochondria	10449,1892,3028,3030,3032,3033,3295,51102,5538,9374	10449,3028,3032	10	3	30	0.989317	Human
hsa05220	Chronic myeloid leukemia	10000,1019,1021,1026,1027,1029,1147,130399,1398,1399,1487,1488,1869,1870,1871,207,208,2122,23533,23624,25,25759,2885,3065,3066,3265,3551,369,3845,399694,4088,4089,4193,4609,4790,4791,4792,4893,5290,5291,5293,5294,5295,5296,53358,5594,5595,5604,5605,572,5781,5894,5925,595,5970,598,613,6464,6654,6655,673,6776,6777,7040,7042,7043,7046,7048,7157,8503,8517,861,867,868,91,9846	10000,1019,1021,1487,1488,1870,1871,207,208,4790,4791,595,5970	76	13	17.1053	0.988737	Human
hsa04520	Adherens junction	10163,10458,10580,10810,117178,130399,1387,1457,1459,1460,1495,1496,1499,1500,1956,2033,2064,2241,2260,2534,25945,29119,3480,3643,387,4008,4087,4088,4089,4233,4301,51176,51701,52,5594,5595,56288,5770,5777,5787,5792,5795,5797,5818,5819,5879,5880,5881,60,646048,646821,648921,6591,6615,6714,6885,6932,6934,7046,7048,7082,71,7414,7454,7525,81,81607,83439,87,88,8826,89,8936,8976,91,9855,998,999	1387,1460,2033,2260,2534,5879,5880,5881,60,6591,6714,71,7525	78	13	16.6667	0.985922	Human
hsa00650	Butanoate metabolism	116285,18,1892,1962,217,218,219,220,223,224,2571,2572,3028,3030,3033,3155,3157,3158,3295,35,38,39,501,5019,5160,5161,5162,56898,57016,622,64064,65985,7915,79944,80270	2571,2572,3028,38,39,5160,5161	35	7	20	0.985142	Human
hsa05222	Small cell lung cancer	10000,1017,1019,1021,1027,1030,10319,10401,1147,1163,1282,1284,1286,1288,1869,1870,1871,207,208,2272,22798,2335,23533,284217,317,329,330,331,3551,3655,3673,3674,3675,3685,3688,3908,3909,3910,3911,3912,3913,3914,3915,3918,4149,4609,4790,4791,4792,4842,4843,4846,51588,5290,5291,5293,5294,5295,5296,54205,5728,5743,5747,5915,5925,595,596,5970,598,6256,6257,6258,6502,7157,7185,7186,7187,7188,7189,842,…	10000,1017,1019,1021,1870,1871,207,208,4790,4791,595,5970,898,9134	87	14	16.092	0.983927	Human
hsa05221	Acute myeloid leukemia	10000,1050,11040,1147,1978,207,208,2322,23533,2475,2885,3265,3551,369,3728,3815,3845,4609,4790,4791,4893,51176,5290,5291,5292,5293,5294,5295,5296,5371,5467,5594,5595,5604,5605,572,5894,5914,595,5970,6198,6199,6654,6655,6688,673,6774,6776,6777,6932,6934,7704,83439,8503,8517,861,862,8900	10000,207,208,4790,4791,595,5970,6198,6199,8900	58	10	17.2414	0.980968	Human
hsa00361	gamma-Hexachlorocyclohexane degradation	134147,1551,1576,1577,248,249,250,251,51205,52,53,54,5444,5445,5446,55,64816,93650	1551,1576,1577,64816	18	4	22.2222	0.976955	Human
hsa04920	Adipocytokine signaling pathway	10000,10645,10891,1147,126129,1374,1375,181,207,208,2180,2181,2182,23305,2475,2538,32,3551,3667,3717,3952,3953,4790,4791,4792,4793,4794,4852,5105,5106,51094,51422,51703,53632,5443,5465,5562,5563,5564,5565,5571,5588,5599,5601,5602,5781,57818,5970,6256,6257,6258,6513,6517,6774,6794,7124,7132,7133,7186,79602,84254,8471,8517,8660,8717,9021,9370,948	10000,207,208,2181,2182,4790,4791,5970,6513,6517,948	68	11	16.1765	0.974932	Human
hsa04916	Melanogenesis	10488,107,108,109,111,112,11211,113,114,115,1385,1387,148327,1499,163688,1638,1855,1856,1857,1906,1910,196883,2033,23236,2535,2770,2771,2773,2775,2776,2778,2932,3265,3815,3845,4157,4254,4286,434,4893,51176,51384,51806,5330,5331,5332,54361,5443,5566,5567,5568,5578,5579,5582,5594,5595,5604,5605,5613,5616,5894,64764,6932,6934,7299,7306,7471,7472,7473,7474,7475,7476,7477,7478,7479,7480,7481,7482,7483…	1387,2033,2535,7483,7484,801,805,808,810,815,816,817,818,8321,8324	102	15	14.7059	0.969765	Human
hsa03440	Homologous recombination	10111,10714,146956,25788,29935,4361,4683,5424,5425,57804,5888,5889,5890,5892,5893,6117,6118,6119,641,6742,675,7156,7516,7517,7979,80198,8438,8940	25788,5424,5888,6117,8438	28	5	17.8571	0.955525	Human
hsa00072	Synthesis and degradation of ketone bodies	3155,3157,3158,38,39,5019,56898,622,64064	38,39	9	2	22.2222	0.953395	Human
hsa00240	Pyrimidine metabolism	10201,10587,10622,10714,11128,124583,129607,139596,1503,151531,1633,1635,171568,1723,1806,1807,1841,1854,1890,22978,23649,25885,29922,30833,30834,318,3704,377841,4830,4831,4833,4860,4907,50484,50808,51082,51251,51727,51728,51733,54107,5422,5424,5425,5426,5427,5430,5431,5432,5433,5434,5435,5436,5437,5438,5439,5440,5441,54963,5557,5558,55703,56474,56655,56953,57804,6240,6241,64425,661,7083,7084,729…	10587,1503,1841,1854,318,51082,51727,5424,54963,56474,7296,7298,7371	91	13	14.2857	0.952714	Human
hsa03430	Mismatch repair	10714,27030,2956,29935,3978,4292,4436,4437,5111,5395,5424,5425,57804,5981,5982,5983,5984,5985,6117,6118,6119,6742,9156	5395,5424,5981,6117	23	4	17.3913	0.938867	Human
hsa04080	Neuroactive ligand-receptor interaction	10161,10203,10316,10800,1081,10886,10888,11255,1128,1129,1131,1132,1133,116443,116444,117,122042,1241,1268,1269,134,134860,134864,135,136,1394,1395,140,1442,146,147,148,150,151,1511,152,153,154,155,165829,1812,1813,1814,1815,1816,185,186,187,1901,1902,1903,1909,1910,2147,2149,2150,2151,22953,23566,2357,2358,2359,23620,2488,2492,2550,2554,2555,2556,2557,2558,2559,2560,2561,2562,2563,2564,2565,2566…	10886,1268,1269,134,135,136,1901,1902,1903,23566,2587,2831,2832,4985,4986,4987,4988,53637,6751,6752,6753,6754,6755,7442,8484,8698,8811,886,887,9170,9294	256	31	12.1094	0.937134	Human
hsa05223	Non-small cell lung cancer	10000,1019,1021,1029,11186,1869,1870,1871,1950,1956,2064,207,208,2272,2309,23533,2885,3265,369,3845,4893,5170,5290,5291,5293,5294,5295,5296,5335,5336,5578,5579,5582,5594,5595,5604,5605,572,5894,5915,5925,595,6256,6257,6258,6654,6655,673,6789,7039,7157,83593,842,8503	10000,1019,1021,1870,1871,207,208,595	54	8	14.8148	0.933553	Human
hsa00281	Geraniol degradation	27034,28976,3028,3033,3295	3028	5	1	20	0.925487	Human
hsa00290	Valine, leucine and isoleucine biosynthesis	23395,3376,51520,5160,5161,5162,55699,57176,586,587,7407	5160,5161	11	2	18.1818	0.920579	Human
hsa04662	B cell receptor signaling pathway	10000,10451,10725,10892,11025,11261,1147,1380,207,208,2213,2353,23533,25780,2932,29760,3265,3551,3635,3725,3845,4067,4772,4773,4775,4776,4790,4791,4792,4793,4794,4893,5290,5291,5293,5294,5295,5296,5336,5530,5532,5533,5534,5535,5579,5777,5879,5880,5881,63928,6850,695,7409,7410,84433,8503,8517,8519,8915,930,933,971,973,974,975	10000,207,208,4790,4791,5534,5879,5880,5881	65	9	13.8462	0.914616	Human
hsa05219	Bladder cancer	1019,1026,1029,11186,1612,1613,1869,1870,1871,1890,1950,1956,2064,2261,2277,23604,3265,3576,369,3845,4193,4312,4313,4318,4609,4893,5228,5594,5595,5604,5605,5894,5925,595,673,7057,7157,7422,7423,7424,9252,999	1019,1870,1871,2261,595,7057	42	6	14.2857	0.900994	Human
hsa00520	Nucleotide sugars metabolism	23483,2582,2592,7358,7360,80146	2582	6	1	16.6667	0.895118	Human
hsa05211	Renal cell carcinoma	10000,10298,112399,1387,1398,1399,201163,2033,2034,207,208,2113,2271,2277,23533,2549,2885,2889,3082,3091,3265,369,3725,3845,405,4233,4893,5058,5062,5063,5155,5228,5290,5291,5293,5294,5295,5296,54583,5594,5595,5604,5605,56924,57144,5781,5879,5894,5906,5908,6513,6654,6655,673,6921,6923,7039,7040,7042,7043,7422,7423,7424,7428,8453,8503,9915,9978,998	10000,1387,2033,207,208,5879,5906,5908,6513	69	9	13.0435	0.883855	Human
hsa00280	Valine, leucine and isoleucine degradation	10449,11112,1629,1738,18,1892,1962,217,218,219,220,223,224,26275,30,3028,3030,3032,3033,3155,3157,3158,316,3295,34,35,3712,38,39,4329,4594,501,5019,5095,5096,549,56922,586,587,593,594,64064,64087,84693	10449,1738,3028,3032,38,39	44	6	13.6364	0.880227	Human
hsa04020	Calcium signaling pathway	107,108,10800,109,11261,1128,1129,113,113026,1131,1133,1139,114,115,135,136,146,147,148,153,154,155,163688,1812,1816,185,1909,1910,1956,196883,2064,2065,2066,2149,2185,22953,23236,2767,2769,2774,2776,2778,2902,2903,2905,2906,291,2911,2915,292,2925,293,3269,3274,3356,3357,3358,3360,3361,3362,3363,3706,3707,3708,3709,3710,3973,4638,4842,4843,4846,487,488,489,490,491,492,4923,493,5021,5023,5024,5025…	135,136,5136,5137,5153,5534,729317,7416,7417,7419,801,805,808,810,814,815,816,817,818,886,887	179	21	11.7318	0.874968	Human
hsa05218	Melanoma	10000,1019,1021,1026,1029,1869,1870,1871,1950,1956,207,208,2246,2247,2248,2249,2250,2251,2252,2253,2254,2255,2256,2257,2258,2259,2260,23533,26281,26291,27006,3082,3265,3479,3480,369,3845,4193,4233,4286,4893,5154,5155,5156,5159,5290,5291,5293,5294,5295,5296,5594,5595,56034,5604,5605,572,5728,5894,5925,595,673,7157,80310,8074,8503,8817,8822,8823,9965,999	10000,1019,1021,1870,1871,207,208,2260,595	71	9	12.6761	0.866423	Human
hsa00591	Linoleic acid metabolism	100137049,1544,1551,1557,1558,1559,1562,1571,1573,1576,1577,240,246,26279,30814,50487,5319,5320,5321,5322,57016,64600,64816,80270,81579,8398,8399,84647,8681	1551,1576,1577,64816	29	4	13.7931	0.864105	Human
hsa00930	Caprolactam degradation	10327,1892,1962,3028,3030,3033,3295	3028	7	1	14.2857	0.862133	Human
hsa00680	Methane metabolism	128,4025,4524,6470,6472,847,9588	9588	7	1	14.2857	0.862133	Human
hsa05322	Systemic lupus erythematosus	121504,126961,128312,1511,158983,1991,2209,2212,2213,2214,2215,221613,255626,286436,2903,2904,3012,3013,3014,3015,3017,3018,3020,3021,3108,3109,3111,3112,3113,3115,3117,3118,3119,3122,3123,3125,3126,3127,317772,333932,340096,3458,3586,388177,391769,440093,440689,442461,474381,474382,554313,55506,55766,644914,644950,651868,652578,653604,6628,6632,6634,6737,6738,6741,712,7124,713,714,715,716,717,71…	126961,3015,3020,3021,653604,8329,8350,8351,8352,8353,8354,8355,8356,8357,8358,8968,94239	144	17	11.8056	0.861971	Human
hsa05060	Prion disease	2670,284217,3309,3329,333,3569,389672,3912,3915,3921,4780,5621,596,7124	3329,4780	14	2	14.2857	0.857973	Human
hsa00603	Glycosphingolipid biosynthesis - globoseries	10317,10690,2523,2524,26301,2717,3073,3074,4668,53947,6482,6483,6489,8706	2717,4668	14	2	14.2857	0.857973	Human
hsa04370	VEGF signaling pathway	10000,100137049,10725,11261,1432,207,208,23533,25759,26279,30814,3265,3315,3791,3845,4772,4773,4775,4776,4846,4893,50487,5290,5291,5293,5294,5295,5296,5319,5320,5321,5322,5335,5336,5530,5532,5533,5534,5535,5578,5579,5582,5594,5595,5600,5603,5604,5605,56848,572,5743,5747,5829,5879,5880,5881,5894,6300,63928,64600,6714,7422,7867,81579,8398,8399,842,84647,8503,8681,8877,9047,9261,998	10000,207,208,3315,5534,5879,5880,5881,6714	74	9	12.1622	0.837832	Human
hsa00960	Alkaloid biosynthesis II	1066,13,221223,24142,253558,314,3988,51126,51365,51400,80339,80821,8260,8639,9588	51365,9588	15	2	13.3333	0.834322	Human
hsa00632	Benzoate degradation via CoA ligation	1892,1962,24142,253558,26027,2639,3030,38,39,51126,55432,80339,8260,97,98	38,39	15	2	13.3333	0.834322	Human
hsa00251	Glutamate metabolism	113451,124454,1373,18,2058,2571,2572,2673,27165,2729,2730,2744,2746,2747,2752,2805,2806,2875,2936,2937,5471,55191,55577,5859,64841,790,7915,84706,8659,8833,9945	2571,2572,2936,8659	31	4	12.9032	0.832959	Human
hsa00310	Lysine degradation	10157,132949,1743,1892,1962,217,218,219,220,223,224,2639,28972,3028,3030,3033,3295,38,39,4967,501,51166,51268,5351,5352,55217,55753,60496,60559,8424,8985	3028,38,39,55217	31	4	12.9032	0.832959	Human
hsa05210	Colorectal cancer	10000,10297,11211,130399,1499,1630,1855,1856,1857,1956,207,208,2353,23533,2535,26060,2885,2932,2956,324,332,3480,369,3725,3845,387,4087,4088,4089,4233,4292,4436,4437,4609,51176,5156,5159,5290,5291,5293,5294,5295,5296,54205,5594,5595,5599,5601,5602,5604,572,581,5879,5880,5881,5894,5900,595,596,6654,6655,673,6932,6934,7040,7042,7043,7046,7048,7157,7855,7976,8312,8313,8321,8322,8323,8324,8325,8326,8…	10000,207,208,2535,5879,5880,5881,595,8321,8324	85	10	11.7647	0.818402	Human
hsa04950	Maturity onset diabetes of the young	168620,2494,3087,3110,3170,3171,3172,3174,3175,3280,3375,3630,3651,389692,4760,4821,4825,50674,5078,5080,5313,6514,6927,6928	3175,389692,6514	24	3	12.5	0.810385	Human
hsa01061	Biosynthesis of phenylpropanoids	1719,2023,2026,2027,2203,226,229,230,2356,2597,2645,2805,2806,2821,3098,3099,3101,4025,441531,5211,5213,5214,5223,5224,5230,5232,5313,5315,669,6888,6898,8789,9588	441531,5223,5224,9588	33	4	12.1212	0.79931	Human
hsa04012	ErbB signaling pathway	10000,1026,1027,10298,10718,1398,1399,145957,1839,1950,1956,1978,2002,2064,2065,2066,2069,207,208,23533,23624,2475,25,2549,25759,27,2885,2932,3084,3265,369,3725,374,3845,399694,4609,4690,4893,5058,5062,5063,5290,5291,5293,5294,5295,5296,5335,53358,5336,5578,5579,5582,5594,5595,5599,5601,5602,5604,5605,5609,56924,57144,572,5747,5894,6198,6199,6416,6464,6654,6655,6714,673,6776,6777,685,7039,815,816…	10000,207,208,6198,6199,6714,815,816,817,818	87	10	11.4943	0.798003	Human
hsa04150	mTOR signaling pathway	10000,1975,1977,1978,207,208,2277,23533,2475,253260,253314,25989,27330,3091,3479,3630,5170,51719,5228,5290,5291,5293,5294,5295,5296,54541,5562,5563,5594,5595,57521,6009,6194,6195,6196,6197,6198,6199,64223,673,6794,7248,7249,7422,7423,7424,8408,8503,92335,9470,9706	10000,207,208,51719,6198,6199	51	6	11.7647	0.792326	Human
hsa00400	Phenylalanine, tyrosine and tryptophan biosynthesis	10056,10667,2193,2805,2806,5053,51067,6898,8565	5053	9	1	11.1111	0.791278	Human
hsa03420	Nucleotide excision repair	1022,1069,10714,1161,1642,1643,2067,2068,2071,2072,2073,2074,2965,2966,2967,2968,29935,3978,404672,4331,5111,54107,5424,5425,5426,5427,56655,57804,5887,5981,5982,5983,5984,5985,6117,6118,6119,7507,7508,8450,8451,902,9978	5424,5887,5981,6117,902	43	5	11.6279	0.778533	Human
hsa00052	Galactose metabolism	231,2538,2548,2582,2584,2585,2592,2595,2645,2683,2717,2720,3098,3099,3101,3906,3938,5211,5213,5214,5236,5238,57818,7360,8704,8972	2582,2717,3906	26	3	11.5385	0.769055	Human
hsa04742	Taste transduction	112,114,196883,259285,259286,259287,259289,259290,259291,259292,259294,259295,259296,2778,2782,2784,2785,2914,29850,338398,346562,353164,3710,3745,40,50831,50832,50833,50834,50835,50836,50837,50838,50839,50840,5136,51764,5330,54429,5566,5567,5568,5613,5616,5726,6337,6338,6340,773,774,80834,80835,83756	40,5136,6337,6338,6340,80834	53	6	11.3208	0.763598	Human
hsa00230	Purine metabolism	100,10201,10606,10622,107,10714,108,10846,109,111,11128,11164,112,113,114,115,122481,122622,124583,132,158,159,1633,171568,1716,1890,196883,203,204,205,221823,2272,22978,23649,25885,2618,26289,270,271,27115,272,2766,2977,2982,2983,2984,2986,2987,29922,3000,30833,30834,318,3251,353,3614,3615,3704,377841,471,4830,4831,4833,4860,4881,4882,4907,50484,50940,51082,51251,51292,5136,5137,5138,5139,5140,5…	203,26289,318,4881,4882,51082,5136,5137,5141,5142,5143,5151,5153,53343,5424,8622	148	16	10.8108	0.759539	Human
hsa00010	Glycolysis / Gluconeogenesis	10327,124,125,126,127,128,130,130589,131,160287,1737,1738,2023,2026,2027,217,218,219,220,2203,221,222,223,224,226,229,230,2538,2597,2645,2821,3098,3099,3101,3939,3945,3948,441531,501,5160,5161,5162,5211,5213,5214,5223,5224,5230,5232,5236,5238,5313,5315,55902,57818,669,7167,728188,84532,8789,92483,97,98	1737,1738,441531,5160,5161,5223,5224	63	7	11.1111	0.752403	Human
hsa03030	DNA replication	10535,10714,1763,2237,23649,246243,29935,3978,4171,4172,4173,4174,4175,4176,5111,54107,5422,5424,5425,5426,5427,5557,5558,56655,57804,5981,5982,5983,5984,5985,6117,6118,6119,6742,79621,84153	5424,5981,6117,79621	36	4	11.1111	0.745129	Human
hsa05217	Basal cell carcinoma	10297,11211,1499,1855,1856,1857,2535,27148,2735,2736,2737,2932,324,51176,51384,51684,54361,5727,64399,6469,650,652,6608,6932,6934,7157,7471,7472,7473,7474,7475,7476,7477,7478,7479,7480,7481,7482,7483,7484,7855,7976,80326,81029,8312,8313,8321,8322,8323,8324,8325,8326,83439,8643,89780	2535,27148,7483,7484,8321,8324	55	6	10.9091	0.733663	Human
hsa04510	Focal adhesion	10000,10298,10319,103910,10398,10451,10627,1101,1277,1278,1280,1281,1282,1284,1286,1288,1289,1290,1291,1292,1293,1301,1302,1311,131873,1398,1399,1499,1729,1793,1950,1956,2002,2064,207,208,2277,22798,22801,2316,2317,2318,2321,2324,2335,23396,23533,2534,25759,284217,2885,2889,2909,2932,29780,29895,3082,3265,329,330,331,3371,3381,3479,3480,3611,3655,3672,3673,3674,3675,3676,3678,3679,3680,3685,3688,…	10000,1311,207,208,2534,5879,5880,5881,5906,5908,595,60,6714,7057,7058,7059,7060,71,824,894,896	203	21	10.3448	0.70971	Human
hsa04130	SNARE interactions in vesicular transport	10228,10282,10490,10652,10791,112755,116841,143187,203062,2054,23673,415117,51272,53407,55014,55850,6616,662,6804,6809,6810,6811,6843,6844,6845,8417,8673,8674,8675,8676,8677,8773,9341,9342,9482,9527,9554,9570	23673,8417,8675,9482	38	4	10.5263	0.70722	Human
hsa04340	Hedgehog signaling pathway	122011,1452,1453,1454,1455,1456,23291,2619,27148,2735,2736,2737,2932,353500,3549,4036,50846,51384,51684,51715,53944,54361,5566,5567,5568,5613,5616,5727,64399,6469,650,652,653,654,655,656,6608,7471,7472,7473,7474,7475,7476,7477,7478,7479,7480,7481,7482,7483,7484,7546,80326,81029,8643,8945,89780	1455,1456,27148,53944,7483,7484	57	6	10.5263	0.70276	Human
hsa04070	Phosphatidylinositol signaling system	1040,10423,113026,114971,1606,1607,1608,160851,1609,163688,200576,23236,23396,23533,27124,3612,3613,3628,3631,3632,3633,3635,3636,3705,3706,3707,3708,3709,3710,4952,51196,51763,51806,5286,5287,5288,5289,5290,5291,5293,5294,5295,5296,5297,5298,5305,5330,5331,5332,5333,5335,5336,5578,5579,5582,56623,5728,64768,79837,801,805,808,810,8394,8395,8396,84812,8503,8525,8526,8527,8760,8821,8867,8871,89869,…	114971,3612,3613,3632,801,805,808,810	77	8	10.3896	0.690563	Human
hsa03060	Protein export	157708,23478,5018,653226,6726,6727,6728,6729,6730,6731,6734,90701	6734	12	1	8.33333	0.680993	Human
hsa04730	Long-term depression	100137049,10672,10842,1392,1394,23236,26279,2767,2768,2770,2771,2773,2775,2776,2778,2781,2890,2891,2892,2895,2911,2915,2977,2982,2983,2984,2986,3000,30814,3265,3479,3480,369,3708,3709,3710,3845,4067,4842,4843,4846,4881,4882,4893,50487,5319,5320,5321,5322,5330,5331,5332,5515,5516,5518,5519,5520,5521,5522,5578,5579,5582,5592,5593,5594,5595,5604,5605,5894,6261,64600,673,773,81579,8398,8399,84647,8681	4881,4882,5515,5516,5518,5519,5592,5593	78	8	10.2564	0.676873	Human
hsa03320	PPAR signaling pathway	10062,10580,10998,10999,11001,116519,126129,1374,1375,1376,1579,1581,1582,1593,1622,1962,2167,2168,2169,2170,2171,2172,2173,2180,2181,2182,23305,2710,2712,284541,28965,30,3158,33,335,336,34,345,3611,364,376497,4023,4199,4312,4973,51,5105,5106,51129,5170,51703,5346,5360,5465,5467,5468,6256,6257,6258,6319,6342,642956,7316,7350,8309,8310,9370,9415,948	1579,2181,2182,284541,4023,4199,948	69	7	10.1449	0.666417	Human
hsa00480	Glutathione metabolism	119391,124975,221357,2539,257202,2678,2686,2687,26873,2729,2730,2876,2877,2878,2879,2880,2882,290,2936,2937,2938,2939,2940,2941,2944,2946,2947,2948,2949,2950,2952,2953,2954,3417,3418,373156,4257,4258,4259,4953,50484,51056,51060,5226,6240,6241,6611,6723,79017,9446	119391,2936,2952,2953,9446	50	5	10	0.6604	Human
hsa00532	Chondroitin sulfate biosynthesis	10090,11285,113189,126792,135152,166012,22856,26229,27087,29940,337876,50515,51363,54480,55454,55501,55790,56548,64131,64132,79586,9469	54480,79586	22	2	9.09091	0.649882	Human
hsa00710	Carbon fixation	10873,2203,226,229,22934,230,23729,2805,2806,2875,4190,4191,4199,5230,5232,5313,5315,6120,7086,7167,8277,84076,84706,8789	10873,4199	24	2	8.33333	0.596062	Human
hsa03050	Proteasome	5682,5683,5684,5685,5686,5687,5688,5689,5690,5691,5692,5693,5694,5695,5701,5702,5705,5707,5708,5710,5717,5718,5719,9861	5693,5718	24	2	8.33333	0.596062	Human
hsa00410	beta-Alanine metabolism	18,1806,1807,1892,1962,217,218,219,220,223,224,23417,2571,2572,26275,3030,314,34,501,51733,6611,6723,84735,8639	2571,2572	24	2	8.33333	0.596062	Human
hsa00630	Glyoxylate and dicarboxylate metabolism	10797,125061,132158,1431,25902,283871,4190,4191,4522,48,50,51179,54363,81888,9380	125061	15	1	6.66667	0.574571	Human
hsa04140	Regulation of autophagy	10533,11337,11345,115201,23192,23710,25989,30849,3439,3440,3441,3442,3443,3444,3445,3446,3447,3448,3449,3451,3452,3458,3630,441925,5289,5562,5563,64422,8408,84938,84971,8678,9140,9474,9706	11337,11345,23710	35	3	8.57143	0.569256	Human
hsa00590	Arachidonic acid metabolism	100137049,113612,124975,1555,1557,1558,1559,1562,1571,1573,1579,2053,239,240,242,246,247,257202,26279,2678,2686,2687,27306,284541,2876,2877,2878,2879,2880,2882,30814,4048,4051,4056,50487,5319,5320,5321,5322,5730,5740,5742,5743,64600,6916,80142,81579,8398,8399,84647,8529,8644,8681,873,874,9536	1579,284541,4051,6916,8529	56	5	8.92857	0.554681	Human
hsa04360	Axon guidance	10154,1020,10298,10371,10500,10501,10505,10507,10509,10512,1072,10725,1073,11261,137970,1630,1808,1942,1943,1944,1945,1946,1947,1948,1949,1969,2041,2042,2043,2044,2045,2046,2047,2048,2049,2050,2051,219699,223117,2242,22854,22885,23365,23380,23654,25,2534,25791,27289,2770,2771,2773,285220,2932,29984,3265,3688,3845,387,3897,3983,3984,3985,4233,4690,4772,4773,4775,4776,4893,4917,5058,5062,5063,5361,…	1020,23654,2534,5361,5362,5364,5365,5534,55558,5879,5880,5881	129	12	9.30233	0.54158	Human
hsa00670	One carbon pool by folate	10588,10797,10840,10841,123263,1719,25902,2618,275,4522,4524,4548,471,6470,6472,7298	7298	16	1	6.25	0.540993	Human
hsa00511	N-Glycan degradation	10825,129807,175,23324,2517,2519,2720,3073,3074,3938,4123,4125,4126,4758,4759,64772	64772	16	1	6.25	0.540993	Human
hsa04664	Fc epsilon RI signaling pathway	10000,100137049,10451,1432,1437,207,208,2205,2206,2207,23533,2534,26279,27040,2885,30814,3265,3562,3565,3567,3596,3635,3845,3937,4067,4893,50487,5163,5290,5291,5293,5294,5295,5296,5319,5320,5321,5322,5335,5336,5578,5579,5580,5581,5594,5595,5599,5600,5601,5602,5603,5604,5605,5606,5608,5609,5879,5880,5881,5894,6300,6416,64600,650832,6654,6655,6850,695,7124,7409,7410,81579,8398,8399,84647,8503,8681,…	10000,207,208,2534,5879,5880,5881	78	7	8.97436	0.531675	Human
hsa04210	Apoptosis	10000,11213,11261,1147,1439,1676,1677,2021,207,208,23052,23533,317,329,330,331,355,3551,3552,3553,3554,3556,356,3562,3563,3654,3656,4615,472,4790,4791,4792,4803,4914,51135,5290,5291,5293,5294,5295,5296,54205,5530,5532,5533,5534,5535,5566,5567,5568,5573,5575,5576,5577,5613,5616,572,581,596,5970,598,637,63928,651610,7124,7132,7157,7186,823,824,836,839,840,841,842,843,8503,8517,8717,8737,8743,8772,8…	10000,207,208,4790,4791,5534,5970,824	90	8	8.88889	0.508828	Human
hsa04912	GnRH signaling pathway	100137049,107,10746,108,1081,109,111,112,113,114,115,1432,163688,1839,1956,196883,2002,2185,23236,2488,26279,2767,2776,2778,2796,2797,2798,2885,30814,3265,3708,3709,3710,3725,3845,3972,4214,4215,4216,4313,4323,468,4893,50487,51806,5319,5320,5321,5322,5330,5331,5332,5337,5338,5566,5567,5568,5578,5579,5580,5594,5595,5598,5599,5600,5601,5602,5603,5604,5605,5606,5608,5609,5613,5616,5894,6300,6416,646…	6714,801,805,808,810,815,816,817,818	101	9	8.91089	0.501721	Human
hsa00562	Inositol phosphate metabolism	113026,114971,200576,23236,23396,253430,27124,3612,3613,3628,3631,3632,3633,3636,3705,3706,3707,4952,51196,51477,51763,5289,5290,5291,5293,5294,5297,5298,5305,5330,5331,5332,5333,5335,5336,55586,56623,5728,64768,79837,8394,8395,8396,84812,8821,8867,8871,89869,9562	114971,3612,3613,3632	49	4	8.16327	0.494056	Human
hsa05010	Alzheimer's disease	2,23385,23621,25825,2597,2932,3028,322,3416,348,351,3553,4023,4035,4137,4311,51107,55851,5663,5664,6622,712,7124,713,714,836,840,8883	3028,4023	28	2	7.14286	0.493177	Human
hsa01510	Neurodegenerative Diseases	11315,120892,1387,1822,2033,23064,2597,2670,2885,3064,320,3309,333,348,351,4137,4744,4804,4929,5071,55294,5621,5663,5664,572,57679,581,596,598,65018,6622,6647,7345,834,836,839,840,841,9217	1387,2033,9217	39	3	7.69231	0.483205	Human
hsa03010	Ribosome	100130562,11224,140801,200916,2197,23521,283412,284064,284230,284288,284393,285053,28998,342994,347292,388720,389342,389435,389672,390876,391656,3921,392447,392979,402057,439992,440589,440733,440737,441377,441876,4736,51187,6122,6123,6128,6129,6132,6133,6135,6136,6137,6141,6142,6143,6144,6147,6152,6154,6155,6156,6157,6158,6159,6160,6161,6164,6165,6166,6167,6168,6169,6170,6171,6173,6187,6188,6189,…	140801,28998,6122,6123,6135,6188,6202,6231	93	8	8.60215	0.467836	Human
hsa00380	Tryptophan metabolism	10352,11185,114049,121278,125061,130013,131965,15,1543,1544,1545,1644,169355,1892,1962,217,218,219,220,223,224,23498,26,2639,3028,3030,3033,316,3295,3620,38,39,4128,4129,438,4799,4967,501,51166,51409,51451,55753,55798,60487,6999,7166,7453,847,8564,8942,9836	125061,3028,38,39	51	4	7.84314	0.457396	Human
hsa00561	Glycerolipid metabolism	10327,10554,10555,1056,11343,132158,137964,158835,1606,1607,1608,160851,1609,217,218,219,220,223,224,231,253558,26007,2710,2712,2717,2720,3938,3988,3990,4023,501,5406,5407,5408,55750,56894,56895,57678,727765,80339,84649,8513,8525,8526,8527,8611,8612,8613,8694,9162,9388	2717,3990,4023,9388	51	4	7.84314	0.457396	Human
hsa04660	T cell receptor signaling pathway	10000,10125,1019,10298,10451,10725,10892,11261,1147,1326,1437,1493,207,208,2353,23533,23624,2534,27040,2885,29851,3265,3458,3551,3558,3565,3567,3586,3702,3725,3845,387,3932,3937,4690,4772,4773,4775,4776,4790,4791,4792,4793,4794,4893,5058,5062,5063,5133,5163,5290,5291,5293,5294,5295,5296,5335,5530,5532,5533,5534,5535,5588,56924,57144,5777,5788,63928,6654,6655,7006,7124,7409,7410,7535,8440,84433,85…	10000,1019,207,208,2534,4790,4791,5534	94	8	8.51064	0.454427	Human
hsa05030	Amyotrophic lateral sclerosis (ALS)	2876,3735,4741,4744,4747,5530,572,57679,581,5868,5879,596,598,6506,6647,6748,7157,847,9973	5879	19	1	5.26316	0.44757	Human
hsa05213	Endometrial cancer	10000,10297,1495,1496,1499,1950,1956,2002,2064,207,208,2309,23533,2885,29119,2932,324,3265,3611,369,3845,4292,4609,4893,51176,5170,5290,5291,5293,5294,5295,5296,5594,5595,5604,5605,572,5728,5894,595,6654,6655,673,6932,6934,7157,8312,8313,83439,842,8503,999	10000,207,208,595	52	4	7.69231	0.439549	Human
hsa04010	MAPK signaling pathway	10000,100137049,10125,10235,10368,10369,10454,10746,10912,11072,11184,11221,11261,1147,115727,130399,1326,1386,1398,1399,1432,1616,1647,1649,1843,1844,1845,1846,1847,1848,1849,1850,1852,1950,1956,2002,2005,207,208,2122,2246,2247,2248,2249,2250,2251,2252,2253,2254,2255,2256,2257,2258,2259,2260,2261,2263,2264,22800,22808,23118,2316,23162,2317,2318,2353,23542,25780,26279,26281,26291,27006,27091,2709…	10000,207,208,2260,2261,2263,2264,23162,3315,408,409,4790,4791,51347,5534,55799,57551,5879,5880,5881,5906,5908,5922,9344	267	24	8.98876	0.430765	Human
hsa04930	Type II diabetes mellitus	122809,23533,2475,3551,3630,3643,3651,3667,3767,389692,5290,5291,5293,5294,5295,5296,5313,5315,5580,5581,5590,5594,5595,5599,5601,5602,6514,6517,6833,7124,773,774,775,776,777,8471,8503,8651,8660,8835,8913,9021,9370	389692,6514,6517	43	3	6.97674	0.403693	Human
hsa00360	Phenylalanine metabolism	1644,218,220,221,222,24142,253558,2805,2806,314,3242,4025,4128,4129,4282,51126,6898,80339,8260,8639,9588	9588	21	1	4.7619	0.391902	Human
hsa04940	Type I diabetes mellitus	1363,2571,2572,3002,3105,3106,3107,3108,3109,3111,3112,3113,3115,3117,3118,3119,3122,3123,3125,3126,3127,3133,3134,3135,3329,3382,3458,355,3552,3553,3558,356,3592,3593,3630,4049,5551,5798,5799,649853,7124,940,941,942	2571,2572,3329	44	3	6.81818	0.385068	Human
hsa00120	Bile acid biosynthesis	10449,1056,10998,1109,124,125,126,127,128,130,131,1581,1593,217,218,219,220,223,224,27034,28976,30,3032,3988,501,570,57016,6646,6715,6716,6718,80270,8435	10449,3032	33	2	6.06061	0.378925	Human
hsa00640	Propanoate metabolism	160287,18,1892,1962,217,218,219,220,223,224,23417,26275,283398,3030,31,32,34,38,39,3939,3945,3948,4329,4594,501,5095,5096,55902,84532,84693,8801,8802,8803,92483	38,39	34	2	5.88235	0.358357	Human
hsa00790	Folate biosynthesis	10973,11056,11164,1719,23020,23400,23517,2356,248,249,250,251,254552,2643,317781,51202,51428,54456,54514,54606,55308,57089,57696,5805,5860,64135,6595,6697,79009,79039,79132,8467,8836,8886,9416	8467,8886	35	2	5.71429	0.338585	Human
hsa04512	ECM-receptor interaction	10319,1101,1277,1278,1280,1281,1282,1284,1286,1288,1289,1290,1291,1292,1293,1301,1302,1311,131873,1605,22798,22801,22987,2335,2811,2812,2814,2815,284217,3161,3339,3371,3381,3655,3672,3673,3674,3675,3676,3678,3679,3680,3685,3688,3690,3691,3693,3694,3695,3696,375790,3908,3909,3910,3911,3912,3913,3914,3915,3918,50509,51206,5649,6382,6383,6385,63923,6696,7057,7058,7059,7060,7143,7148,7448,7450,8515,8…	1311,7057,7058,7059,7060,948	84	6	7.14286	0.298856	Human
hsa03020	RNA polymerase	10622,11128,171568,25885,30834,51082,51728,5430,5431,5432,5433,5434,5435,5436,5437,5438,5439,5440,5441,55703,64425,661,84172,84265,9533	51082	25	1	4	0.29669	Human
hsa04540	Gap junction	10376,10381,10382,10383,107,10746,108,109,111,112,112714,113,113457,114,115,1453,153,1812,1813,1902,1950,1956,196883,203068,23236,2697,2767,2770,2771,2773,2776,2778,2885,2911,2915,2977,2982,2983,2984,2986,3000,3265,3356,3357,3358,347688,347733,3708,3709,3710,3845,4881,4882,4893,5154,5155,5156,5159,51807,5330,5331,5332,5566,5567,5568,5578,5579,5582,5592,5593,5594,5595,5598,56034,5604,5605,5607,561…	1902,4881,4882,5592,5593,6714,983	96	7	7.29167	0.292654	Human
hsa00970	Aminoacyl-tRNA biosynthesis	10056,10352,10667,123263,123283,124454,16,1615,2058,2193,23395,23438,25973,2617,3035,3376,3735,4141,4677,51067,51520,54938,55157,55699,57038,57176,57505,5859,5917,6301,6897,7407,7453,79587,79731,80222,833,8565,92935	16,57505	39	2	5.12821	0.267466	Human
hsa00600	Sphingolipid metabolism	10558,10825,123099,129807,130367,166929,2531,2581,259230,2629,2717,2720,339221,340485,3938,410,414,415,427,4758,4759,55331,55512,55627,56848,64781,6609,6610,7357,7368,81537,8560,8611,8612,8613,8877,9331,9514,9517	2717,7368	39	2	5.12821	0.267466	Human
hsa05131	EPEC	10092,10376,10381,10382,10383,10971,112714,113457,1499,2017,203068,23643,25,2534,3059,347688,347733,3688,387,3875,4690,4691,4950,51807,5578,56604,60,6093,646048,646821,648921,7099,71,7100,7277,7278,7280,7430,7454,7534,7846,79861,81027,81873,8440,84617,84790,8976,9076,9181,929,9475,998,999	2534,60,71	54	3	5.55556	0.229765	Human
hsa05130	Pathogenic Escherichia coli infection	10092,10376,10381,10382,10383,10971,112714,113457,1499,2017,203068,23643,25,2534,3059,347688,347733,3688,387,3875,4690,4691,4950,51807,5578,56604,60,6093,646048,646821,648921,7099,71,7100,7277,7278,7280,7430,7454,7534,7846,79861,81027,81873,8440,84617,84790,8976,9076,9181,929,9475,998,999	2534,60,71	54	3	5.55556	0.229765	Human
hsa04910	Insulin signaling pathway	10000,10211,10580,10603,10891,122809,1398,1399,163688,1977,1978,2002,207,208,2194,2203,2308,2319,23265,23433,23533,23624,2475,253314,2538,25759,2872,2885,2889,2932,2997,2998,31,32,3265,3551,3630,3635,3643,3667,369,3845,3991,399694,4893,5105,5106,5139,5140,51422,5170,51763,51806,5211,5213,5214,5255,5256,5257,5260,5261,5290,5291,5293,5294,5295,5296,5313,5315,53358,53632,5499,5500,5501,5506,5507,550…	10000,207,208,6198,6199,6517,801,805,808,810	138	10	7.24638	0.222503	Human
hsa00260	Glycine, serine and threonine metabolism	10400,10993,1119,1120,123283,132158,1491,1610,1738,1757,189,211,212,23464,23761,2593,2617,26227,2628,27232,2731,275,29958,29968,314,4128,4129,51268,54938,55349,57016,5723,6301,635,6470,6472,64902,6897,80222,80270,8639,875	1738,55349	42	2	4.7619	0.222247	Human
hsa05216	Thyroid cancer	10342,1499,3265,3845,4609,4893,4914,51176,5468,5594,5595,5604,5605,595,5979,6256,6257,6258,673,6932,6934,7157,7170,7175,7849,8030,8031,83439,999	595	29	1	3.44828	0.221508	Human
hsa00020	Citrate cycle (TCA cycle)	1431,1738,1743,2271,283398,3417,3418,3419,3420,3421,4190,4191,47,48,4967,50,5091,5105,5106,55753,6389,6390,6391,6392,642502,651820,8801,8802,8803	1738	29	1	3.44828	0.221508	Human
hsa04620	Toll-like receptor signaling pathway	10000,10333,10454,114609,1147,1326,1432,148022,207,208,23118,2353,23533,23643,29110,3439,3440,3441,3442,3443,3444,3445,3446,3447,3448,3449,3451,3452,3454,3455,3456,353376,3551,3553,3569,3576,3592,3593,3627,3654,3661,3663,3665,3725,3929,4283,4615,4790,4791,4792,51135,51284,51311,5290,5291,5293,5294,5295,5296,54106,54472,5594,5595,5599,5600,5601,5602,5603,5604,5605,5606,5608,5609,5879,5970,6300,634…	10000,207,208,4790,4791,5879,5970	103	7	6.79612	0.221441	Human
hsa01032	Glycan structures - degradation	10825,10855,129807,138050,175,23324,2517,2519,2588,2629,2720,2799,2990,3073,3074,3373,3423,3425,3938,411,4123,4125,4126,4669,4758,4759,60495,64772,6677,8692	64772	30	1	3.33333	0.205523	Human
hsa00510	N-Glycan biosynthesis	10195,10905,11253,11282,11320,144245,146664,1603,1650,1798,199857,201595,23193,2530,2683,29880,29929,4121,4124,4245,4247,4248,4249,440138,54344,56052,57134,57171,6184,6185,6480,7841,79053,79087,79796,79868,79947,84920,85365,8703,8704,8813,8818,91869	1650,1798	44	2	4.54545	0.195729	Human
hsa00565	Ether lipid metabolism	100137049,10554,10555,133121,137964,253558,26279,30814,5048,50487,5049,5050,5051,5168,5319,5320,5321,5322,5337,5338,56894,56895,56994,64600,81579,8398,8399,84647,8540,8611,8612,8613,8681	5048	33	1	3.0303	0.16353	Human
hsa04612	Antigen processing and presentation	10197,10437,115653,1385,1508,1514,1520,2923,3105,3106,3107,3108,3109,3111,3112,3113,3115,3117,3118,3119,3122,3123,3125,3126,3127,3133,3134,3135,3303,3304,3305,3306,3308,3309,3312,3320,3326,3439,3440,3441,3442,3443,3444,3445,3446,3447,3448,3449,3451,3452,3802,3803,3804,3805,3806,3808,3809,3810,3811,3812,3821,3822,3823,3824,4049,4261,4800,4801,4802,5641,567,5720,5721,57292,5993,5994,649853,6890,689…	1508,3320,3326,4800,8625	88	5	5.68182	0.143054	Human
hsa00330	Arginine and proline metabolism	1152,1158,1159,1160,1373,1610,2058,2593,25973,2628,2746,2747,2805,2806,283208,29920,383,384,435,445,4842,4843,4846,4942,5009,5033,51056,548596,5625,57038,5831,58510,5917,65263,8659,8974	8659	36	1	2.77778	0.129441	Human
hsa05340	Primary immunodeficiency	100,115650,23495,29760,29851,326,3543,3561,3575,3718,3932,4261,57379,5788,5896,5897,5993,5994,64421,6890,6891,695,7374,7535,8517,8625,915,916,920,925,926,930,958,959,973,	8625	36	1	2.77778	0.129441	Human
hsa03410	Base excision repair	100130561,10038,10039,10357,10714,142,143,2237,23583,252969,27301,27343,3146,328,3978,3980,4350,4595,4913,4968,5111,54107,5423,5424,5425,5426,5427,55247,56655,57804,645490,6996,7374,7515,79661,8930	5424	36	1	2.77778	0.129441	Human
hsa04670	Leukocyte transendothelial migration	1003,103910,10398,10411,10451,10627,10686,11069,1364,1365,1366,137075,1432,149461,1495,1496,1499,1500,1535,1536,2185,23533,23562,24146,26285,27035,2770,2771,2773,2909,29119,29895,3383,3676,3683,3684,3688,3689,3702,387,394,399,4267,4301,4313,4318,4478,4633,4636,4688,4689,4950,49861,5010,50508,50848,51208,5175,5290,5291,5293,5294,5295,5296,5335,5336,53842,5578,5579,5582,5600,5603,5747,5781,5829,584…	4689,5879,5880,5906,5908,60,71	119	7	5.88235	0.107642	Human
hsa04810	Regulation of actin cytoskeleton	10092,10093,10094,10095,10109,10152,10163,10297,10298,103910,10398,10451,10458,10552,10627,10672,1072,1073,10787,10788,1128,1129,1131,1132,1133,128239,1398,1399,1445,1729,1730,1793,1950,1956,200576,2147,2149,2245,2246,2247,2248,2249,2250,2251,2252,2253,2254,2255,2256,2257,2258,2259,2260,2261,2263,2264,22800,22801,22808,23191,2335,23365,23396,23533,26230,26281,26291,26999,27006,2768,28964,2909,293…	10094,10109,2260,2261,2263,2264,4627,4628,55740,5879,5880,5881,60,71,79784	217	15	6.91244	0.106885	Human
hsa00051	Fructose and mannose metabolism	197258,2203,226,229,230,231,2645,2762,29085,29925,29926,3098,3099,3101,3795,4351,5207,5208,5209,5210,5211,5213,5214,5372,5373,55276,55757,56886,57016,64077,6652,7167,7264,80270,8776,8789,8790,8898,9107	6652	39	1	2.5641	0.101991	Human
hsa04120	Ubiquitin mediated proteolysis	100131844,10054,10055,10075,10273,10277,10393,10401,10477,11059,11060,11065,1161,118424,140739,148581,1642,1643,22888,22954,23221,23291,23295,23327,23624,23759,246184,25898,26232,26259,26272,27338,27339,29882,29945,3093,326,329,330,331,378884,389898,4193,4214,4281,4591,4734,5071,51343,51366,51433,51434,51465,51529,51588,51619,5371,54926,55070,55120,55236,55284,55294,55585,55958,57154,57448,63893,…	10273,10393,27339,51343,6477,6500,7328,7332	136	8	5.88235	0.0873384	Human
hsa00350	Tyrosine metabolism	114049,124,125,126,127,128,130,131,1312,131965,1621,1638,1644,1891,218,2184,220,221,222,24142,253558,2805,2806,2954,3081,314,316,3242,4128,4129,4282,51126,51409,51451,5409,55798,60487,6898,7054,7173,7299,7306,80339,8260,8639,9836	7054	46	1	2.17391	0.0576117	Human
hsa01430	Cell Communication	10052,10319,10763,10804,1101,112802,121391,125111,125115,127534,1277,1278,1280,1281,1282,1284,1286,1288,1289,1290,1291,1292,1293,1301,1302,1308,1311,131873,140807,147183,147409,162605,1674,1823,1824,1825,1828,1829,1830,192666,196374,219770,22798,2335,25984,2697,2700,2701,2702,2703,2705,2706,2707,2709,284217,286887,319101,3371,3381,338785,342574,349149,3655,3691,374454,375519,3848,3849,3850,3851,3…	1311,60,7057,7058,7059,7060,71	138	7	5.07246	0.0401536	Human
hsa04630	Jak-STAT signaling pathway	10000,10251,10252,10253,10254,10379,10401,11009,1154,116379,122809,1270,1271,1387,1437,1438,1439,1440,1441,1442,1489,149233,161742,163702,200734,2033,2056,2057,207,208,23529,23533,23624,2688,2689,2690,282616,282617,282618,2885,29949,30837,338376,3439,3440,3441,3442,3443,3444,3445,3446,3447,3448,3449,3451,3452,3454,3455,3456,3458,3459,3460,3467,3558,3559,3560,3561,3562,3563,3565,3566,3567,3568,356…	10000,1387,2033,207,208,595,894,896	155	8	5.16129	0.0330896	Human
hsa04650	Natural killer cell mediated cytotoxicity	10451,10725,10870,11261,117157,1437,2185,2207,2214,2215,22914,23533,2534,25759,259197,27040,2885,3002,3105,3106,3107,3133,3135,3265,3383,3384,3439,3440,3441,3442,3443,3444,3445,3446,3447,3448,3449,3451,3452,3454,3455,3456,3458,3459,3460,355,356,3683,3689,369,3802,3803,3804,3805,3806,3808,3809,3810,3811,3812,3821,3822,3823,3824,3845,3932,3937,399694,4068,4276,4277,4772,4773,4775,4776,4893,5058,517…	2534,5534,5879,5880,5881	135	5	3.7037	0.00830953	Human
hsa04610	Complement and coagulation cascades	10747,1361,1378,1380,1604,1675,2,2147,2149,2152,2153,2155,2157,2158,2159,2160,2161,2162,2165,2243,2244,2266,3053,3075,3426,3818,3827,4153,4179,462,5054,5104,5265,5327,5328,5329,5340,5345,5624,5627,5648,623,624,629,7035,7056,710,712,713,714,715,716,717,718,719,720,721,722,725,727,728,729,730,731,732,733,735,7450,966	462	69	1	1.44928	0.00794338	Human
hsa01030	Glycan structures - biosynthesis 1	10090,10164,10195,10585,10678,10905,11041,11226,11227,11253,11282,11285,113189,11320,114805,117248,126792,135152,144245,146664,1603,1650,166012,168391,1798,192134,199857,201595,2131,2132,2134,2135,2137,222537,22856,23193,2530,2589,2590,2591,26229,26290,2650,266722,2683,27087,29071,29929,29954,3340,337876,374378,4121,4124,4166,4245,4247,4248,4249,440138,442117,50515,50614,51146,51301,51363,51809,5…	1650,1798,54480,79586	122	4	3.27869	0.00697165	Human
hsa04640	Hematopoietic cell lineage	1378,1380,1435,1436,1437,1438,1440,1441,1604,1791,2056,2057,2208,2209,2322,2323,2811,2812,2814,2815,290,2993,3122,3123,3125,3126,3127,3552,3553,3554,3559,3562,3563,3565,3566,3567,3568,3569,3570,3574,3575,3581,3589,3590,3655,3672,3673,3674,3675,3676,3678,3684,3690,3815,4254,4311,7037,7066,7124,7173,7850,909,910,911,912,913,914,915,916,917,920,921,924,925,926,928,929,930,931,933,945,947,948,951,952…	948	87	1	1.14943	0.00156457	Human
hsa04514	Cell adhesion molecules (CAMs)	1000,1001,1002,1003,1013,10666,10686,1272,1364,1365,1366,137075,1462,1493,149461,214,22871,23114,23308,23562,23705,24146,257194,25945,26047,26285,2734,29126,29851,3105,3106,3107,3108,3109,3111,3112,3113,3115,3117,3118,3119,3122,3123,3125,3126,3127,3133,3134,3135,3383,3384,3385,3655,3676,3680,3683,3684,3685,3688,3689,3695,3696,3897,4099,4267,4359,4684,4685,4756,4897,4950,49861,5010,50848,51208,513…	10666	133	1	0.75188	2.06605e-05	Human
hsa04740	Olfactory transduction	10798,109,1179,119678,119679,119682,119687,119692,119694,119695,119749,119764,119765,119772,119774,120065,120066,120586,120775,120776,120787,120793,120796,121130,121275,121364,122740,122742,122748,124538,1258,125958,125962,125963,1261,1262,126370,126541,127059,127062,127064,127066,127068,127069,127074,127077,127385,127623,128360,128367,128368,128371,128372,130075,134083,135924,135941,135946,13594…	409,5137,5592,5593,801,805,808,810,815,816,817,818	382	12	3.14136	4.68153e-07	Human
hsa00624	1- and 2-Methylnaphthalene degradation	124,125,126,127,128,130,131,24142,253558,27034,28976,51126,80339,8260		14	0	0	0	Human
hsa05330	Allograft rejection	3002,3105,3106,3107,3108,3109,3111,3112,3113,3115,3117,3118,3119,3122,3123,3125,3126,3127,3133,3134,3135,3458,355,3558,356,3565,3567,3586,3592,3593,5551,649853,7124,940,941,942,958,959		38	0	0	0	Human
hsa00730	Thiamine metabolism	27010,29085,64077,79178,8776,8898,9054,9107		8	0	0	0	Human
hsa00720	Reductive carboxylate cycle (CO2 fixation)	2271,3417,3418,4190,4191,47,48,50,55902,84532		10	0	0	0	Human
hsa00627	1,4-Dichlorobenzene degradation	134147		1	0	0	0	Human
hsa05320	Autoimmune thyroid disease	1081,1493,3002,3105,3106,3107,3108,3109,3111,3112,3113,3115,3117,3118,3119,3122,3123,3125,3126,3127,3133,3134,3135,3439,3440,3441,3442,3443,3444,3445,3446,3447,3448,3449,3451,3452,355,3558,356,3565,3567,3586,5551,649853,7038,7173,7252,7253,940,941,942,958,959		53	0	0	0	Human
hsa05332	Graft-versus-host disease	3002,3105,3106,3107,3108,3109,3111,3112,3113,3115,3117,3118,3119,3122,3123,3125,3126,3127,3133,3134,3135,3458,355,3552,3553,3558,356,3569,3802,3803,3804,3811,3812,3821,3824,5551,57292,649853,7124,940,941,942		42	0	0	0	Human
hsa00604	Glycosphingolipid biosynthesis - ganglioseries	256435,2583,27090,2720,29906,3073,3074,30815,3938,6482,6483,6489,81849,8705,8869,9197		16	0	0	0	Human
hsa00641	3-Chloroacrylic acid degradation	124,125,126,127,128,130,131,217,218,219,220,223,224,501		14	0	0	0	Human
hsa00592	alpha-Linolenic acid metabolism	100137049,26279,30814,50487,51,5319,5320,5321,5322,64600,81579,8310,8398,8399,84647,8681,9415		17	0	0	0	Human
hsa00601	Glycosphingolipid biosynthesis - lactoseries	10317,2523,2524,2525,28,6484,6487,84002,8707,8708		10	0	0	0	Human
hsa00460	Cyanoamino acid metabolism	124975,2629,2678,2686,2687,57733,6470,6472,80150		9	0	0	0	Human
hsa00750	Vitamin B6 metabolism	29968,316,55163,57026,8566		5	0	0	0	Human
hsa00740	Riboflavin metabolism	29085,51205,5167,5169,52,53,54,55,55312,64077,7299,80308,8776,8898,9107,93650		16	0	0	0	Human
hsa00220	Urea cycle and metabolism of amino groups	112483,113451,1373,162417,217,218,219,220,223,224,26,262,2628,383,384,4128,4129,435,445,4953,5009,501,5832,6303,6611,6723,79814,95		28	0	0	0	Human
hsa00643	Styrene degradation	2184,2954,3081		3	0	0	0	Human
hsa00232	Caffeine metabolism	10,1544,1548,1549,1553,7498,9		7	0	0	0	Human
hsa00910	Nitrogen metabolism	11238,1373,1491,23632,27165,2744,2746,2747,275,2752,3034,377677,440,759,760,761,762,763,765,766,767,768,771,80150		24	0	0	0	Human
hsa00920	Sulfur metabolism	10380,166012,445329,50515,55501,6783,6799,6817,6818,6820,6821,6822,9060,9061		14	0	0	0	Human
hsa00271	Methionine metabolism	10768,123263,1491,1786,1787,1788,1789,191,23382,262,27430,29947,4141,4143,4507,4548,635,6723,6898,875,92935		21	0	0	0	Human
hsa00780	Biotin metabolism	28972,3141,60559,686		4	0	0	0	Human
hsa00760	Nicotinate and nicotinamide metabolism	10135,22978,23057,23475,23530,30833,316,349565,4837,4860,4907,51251,5167,5169,54981,55191,56953,64802,65220,683,83594,84618,93034,952		24	0	0	0	Human
hsa00791	Atrazine degradation	103,10930,200315,200316,27350,339,403314,60489,9582		9	0	0	0	Human
hsa00785	Lipoic acid metabolism	11019,51601		2	0	0	0	Human
hsa00903	Limonene and pinene degradation	1557,1559,1892,1962,217,218,219,220,223,224,24142,253558,26027,3030,501,51126,55432,80339,8260		19	0	0	0	Human
hsa00625	Tetrachloroethene degradation	2053,57016,80270		3	0	0	0	Human
hsa05310	Asthma	2205,2206,2207,3108,3109,3111,3112,3113,3115,3117,3118,3119,3122,3123,3125,3126,3127,3562,3565,3567,3578,3586,3596,5553,6037,6356,7124,8288,958,959		30	0	0	0	Human
hsa00602	Glycosphingolipid biosynthesis - neo-lactoseries	10331,10402,10678,10690,11041,2523,2524,2525,2526,2527,2528,2529,2651,2683,28,6489,79369,84002,8702,8703,8704		21	0	0	0	Human
hsa00272	Cysteine metabolism	1036,10993,1491,160287,2805,2806,3939,3945,3948,4357,79587,833,92483		13	0	0	0	Human
hsa05050	Dentatorubropallidoluysian atrophy (DRPLA)	10458,11059,11060,1822,2597,3630,3643,473,834,836,83737,840,841,9223,9863		15	0	0	0	Human
hsa00900	Terpenoid biosynthesis	2222,2224,3422,6713,91734,9453		6	0	0	0	Human
hsa00902	Monoterpenoid biosynthesis	1557,1559		2	0	0	0	Human
hsa00564	Glycerophospholipid metabolism	100137049,1040,10400,10423,10434,10554,10555,1103,1119,1120,11313,137964,1606,1607,1608,160851,1609,162466,23171,23659,23761,24142,253558,26279,2819,2820,30814,3931,43,50487,51126,5130,51573,5319,5320,5321,5322,5337,5338,54675,55224,55500,56894,56895,56994,57678,64600,80339,81490,81579,8260,8398,8399,8443,84647,8525,8526,8527,8611,8612,8613,8681,8760,9162,9468,9791		66	0	0	0	Human
hsa00950	Alkaloid biosynthesis I	1644,2805,2806,6898,7299		5	0	0	0	Human
hsa00030	Pentose phosphate pathway	2203,221823,226,229,22934,230,2539,25796,2821,51071,5211,5213,5214,5226,5236,5238,5631,5634,6120,64080,6888,7086,8277,84076,8789,9563		26	0	0	0	Human
hsa00563	Glycosylphosphatidylinositol(GPI)-anchor biosynthesis	10026,128869,23556,2822,284098,51227,51604,5277,5279,5281,5283,54965,55650,80055,84720,84992,8733,8818,9091,93183,94005,9487,9488		23	0	0	0	Human
hsa01031	Glycan structures - biosynthesis 2	10026,10317,10331,10402,10678,10690,11041,128869,23556,2523,2524,2525,2526,2527,2528,2529,256435,2583,26301,2651,2683,27090,28,29906,30815,51227,51604,5277,5279,5281,5283,53947,54872,54965,55650,6482,6483,6484,6487,6489,7357,79369,80235,81849,84002,84720,84992,8702,8703,8704,8705,8706,8707,8708,8733,8818,8869,9091,93183,9331,94005,9487,9488		63	0	0	0	Human
hsa00300	Lysine biosynthesis	10157,132949,3735,51166,60496		5	0	0	0	Human
hsa00031	Inositol metabolism	4329,7167		2	0	0	0	Human
hsa04710	Circadian rhythm	1407,1408,1453,1454,406,4862,5187,79365,8553,8863,8864,9572,9575		13	0	0	0	Human
hsa01040	Biosynthesis of unsaturated fatty acids	10005,10965,11332,122970,201562,2194,26027,30,3030,3992,51,51144,54898,55432,55825,570,60481,6319,79071,79966,8310,9415,9524		23	0	0	0	Human
hsa00550	Peptidoglycan biosynthesis	114770,114771,2752,57115,8993		5	0	0	0	Human
hsa00100	Biosynthesis of steroids	10654,10682,1594,1595,1717,1718,1728,2222,2224,2677,3156,3422,4047,4597,4598,50814,51478,6307,6309,6713,7108,79001,91734,9453		24	0	0	0	Human
hsa00140	C21-Steroid hormone metabolism	1109,1583,1584,1585,1586,1589,3283,3284,3290,3291,6718		11	0	0	0	Human
hsa00340	Histidine metabolism	10841,114049,131669,131965,144193,1644,217,218,219,220,221,222,223,224,23438,26,3034,3035,3067,3176,4128,4129,443,501,51409,51451,55798,5631,5634,60487,84735,91703,9836		33	0	0	0	Human
hsa00053	Ascorbate and aldarate metabolism	217,218,219,220,223,224,501,55586,7358		9	0	0	0	Human
hsa00130	Ubiquinone biosynthesis	10229,27235,4535,4536,4537,4538,4539,4540,4541,51004,51805,84274		12	0	0	0	Human
hsa04614	Renin-angiotensin system	1215,1359,1511,1636,183,185,186,2028,290,4012,4142,4311,5476,57486,59272,5972,7064		17	0	0	0	Human
hsa00534	Heparan sulfate biosynthesis	2131,2132,2134,2135,2137,222537,26035,266722,3340,64579,728969,8509,90161,9348,9394,9653,9953,9955,9956,9957		20	0	0	0	Human
hsa00061	Fatty acid biosynthesis	2194,27349,31,32,54995,55301		6	0	0	0	Human
hsa00533	Keratan sulfate biosynthesis	10164,10678,11041,2530,2683,4166,6482,6483,6484,6487,8534,8702,8703,8704,93010,9435		16	0	0	0	Human
hsa02010	ABC transporters	10057,10058,10060,10257,10347,10349,10350,10351,1080,11194,1244,154664,19,20,21,215,22,225,23456,23457,23460,23461,24,26154,340273,368,4363,5243,5244,5825,5826,64137,64240,64241,6833,6890,6891,85320,8647,8714,89845,94160,9429,9619		44	0	0	0	Human
hsa00363	Bisphenol A degradation	5444,5445,5446,57016,80270		5	0	0	0	Human
hsa00531	Glycosaminoglycan degradation	10855,138050,2588,2720,2799,2990,3073,3074,3373,3423,3425,3938,411,4669,60495,6677,8692		17	0	0	0	Human
hsa03022	Basal transcription factors	10629,11036,11037,138474,27097,2957,2958,2959,2960,2961,2962,2963,2965,2966,2967,2968,2969,387332,391764,51616,54457,6872,6873,6874,6875,6877,6878,6879,6880,6881,6883,6884,6908,728198,9519,9569		36	0	0	0	Human
hsa00364	Fluorobenzoate degradation	134147		1	0	0	0	Human
hsa00512	O-Glycan biosynthesis	11226,11227,114805,117248,168391,192134,2589,2590,2591,26290,2650,29071,374378,442117,50614,51301,51809,55568,55808,56913,57452,63917,64409,6482,6483,79623,79695,8473,8693,9245,9334		31	0	0	0	Human
hsa00530	Aminosugars metabolism	10007,10020,1118,132789,140838,1486,1727,2645,2673,27159,29085,3073,3074,3098,3099,3101,51005,51706,54187,55577,55907,5973,64077,64841,6675,80896,8776,8898,9107,9945		30	0	0	0	Human
hsa00472	D-Arginine and D-ornithine metabolism	1610		1	0	0	0	Human
hsa03450	Non-homologous end-joining	10111,1791,2237,2547,27343,27434,3981,4361,5591,64421,731751,7518,7520,79840		14	0	0	0	Human
hsa00440	Aminophosphonate metabolism	114049,131965,5130,51409,51451,55798,56994,60487,9468,9836		10	0	0	0	Human
hsa04060	Cytokine-cytokine receptor interaction	10344,10563,10663,10673,10803,10850,10913,11009,115650,116379,1230,1231,1232,1233,1234,1235,1236,1237,1270,1271,1435,1436,1437,1438,1439,1440,1441,1489,149233,1524,163702,1896,1950,1956,2056,2057,2277,2321,2322,2323,2324,23495,23529,23765,268,2688,2689,269,2690,27190,27242,2826,282616,282617,282618,2829,2833,2919,2920,2921,29949,3082,338376,3439,3440,3441,3442,3443,3444,3445,3446,3447,3448,3449,3…		263	0	0	0	Human
hsa00450	Selenoamino acid metabolism	10768,114049,124975,131965,1491,191,22928,22929,23382,2678,2686,2687,27430,4141,4143,51409,51451,51540,55798,60487,875,9060,9061,92935,9836		25	0	0	0	Human
hsa00471	D-Glutamine and D-glutamate metabolism	27165,2744,2746,2747		4	0	0	0	Human
